# Supplementary material for: One-step synthesis of azepino[3,4-b]indoles by cooperative aza-[4 + 3] cycloaddition from readily available feedstocks
Source: Royal Society of Chemistry journal article supplement (doi:10.1039/d2qo00816e), 2022-01-01
Supplement: d2qo00816e1.pdf [file d2qo00816e1.pdf]

## Supplementary Information

### One-Step Synthesis of Azepino[3,4-b]indoles by Cooperative Aza-[4+3] Cycloaddition from Readily Available Feedstocks

Jin-Tian Ma<sup>a</sup>, Ting Chen<sup>a</sup>, Xiang-Long Chen<sup>a</sup>, You Zhou<sup>a</sup>, Zhi-Cheng Yu<sup>a</sup>, Shi-Yi Zhuang<sup>a</sup>,

Maierhaba Alimu<sup>a</sup>, Yan-Dong Wu<sup>a</sup>, Jia-Chen Xiang<sup>\*b</sup> and An-Xin Wu<sup>\*a</sup>

<sup>a</sup>Key Laboratory of Pesticide & Chemical Biology, Ministry of Education, College of Chemistry, Central China Normal University, Wuhan 430079, P. R. China.

<sup>b</sup>School of Chemistry and Chemical Engineering, Southeast University, Nanjing 211189, China.

E-mail: xiangjiachen@seu.edu.cn

E-mail: chwuax@mail.ccnu.edu.cn

| <b>Table of Contents</b>                                                                              | <b>page</b> |
|-------------------------------------------------------------------------------------------------------|-------------|
| 1. General.....                                                                                       | S2          |
| 2. General procedure for the synthesis of <b>4</b> , <b>5</b> and <b>6</b> .....                      | S2          |
| 3. Optimization of the reaction conditions.....                                                       | S3          |
| 4. Mechanism studies.....                                                                             | S5          |
| 5. Characterization data for compounds <b>4</b> , <b>5</b> and <b>6</b> .....                         | S12         |
| 6. Crystallographic data and molecular structure of <b>4b</b> , <b>4r</b> and <b>8d</b> .....         | S49         |
| 7. <sup>1</sup> H and <sup>13</sup> C NMR spectra of compounds <b>4</b> , <b>5</b> and <b>6</b> ..... | S53         |
| 8. References.....                                                                                    | S133        |

## 1. General

All other substrates and reagents were commercially available and used without further purification. TLC analysis was performed using pre-coated glass plates. Column chromatography was performed using silica gel (200–300 mesh).  $^1\text{H}$  spectra were recorded in  $\text{CDCl}_3/\text{DMSO-}d_6$  on 600/400 MHz NMR spectrometers and resonances ( $\delta$ ) are given in parts per million relatives to tetramethylsilane. Data are reported as follows: chemical shift, multiplicity (s = singlet, d = doublet, t = triplet, m = multiplet), coupling constants (Hz) and integration.  $^{13}\text{C}$  spectra were recorded in  $\text{CDCl}_3/\text{DMSO-}d_6$  on 150/100 MHz NMR spectrometers and resonances ( $\delta$ ) are given in ppm. HRMS were obtained on a Bruker 7-tesla FT-ICR MS equipped with an electrospray source. The X-ray crystal-structure determinations of **4b**, **4r** and **8d** were obtained on a Bruker SMART APEX CCD system. Melting points were determined using XT-4 apparatus and not corrected.

## 2. General procedure for the synthesis of 4, 5 and 6(4a as an example)

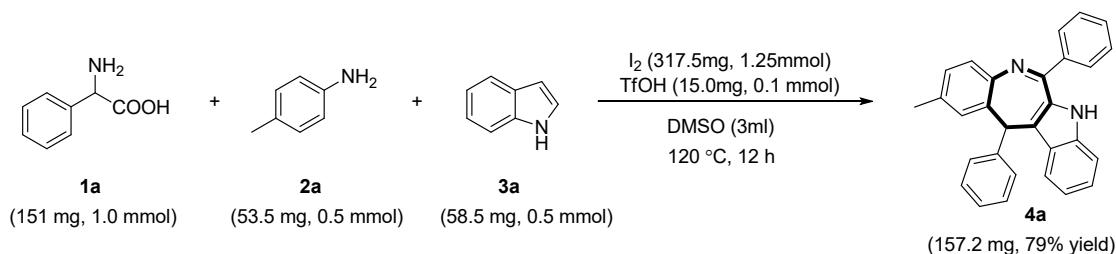

A sealed tube was charged with phenylglycine (**1a**) (151 mg, 1.0 mmol), p-toluidine (**2a**) (53.5 mg, 0.5 mmol), indole (**3a**) (58.5 mg, 0.5 mmol),  $\text{I}_2$  (317.5 mg, 1.25 mmol), TfOH (15.0 mg, 0.1 mmol) and DMSO (3.0 mL, *c* 0.17 M) at  $120\text{ }^\circ\text{C}$  (heating block) for 12 h till almost completed conversion of the substrates by TLC analysis, the mixture was quenched with saturation  $\text{Na}_2\text{S}_2\text{O}_3$  solution (50 mL), extracted with EtOAc ( $3 \times 50$  mL). The combined organic layers were washed with brine, dried over anhydrous  $\text{Na}_2\text{SO}_4$  and concentrated under reduced pressure. The crude product was purified by column chromatography on silica gel (eluent: petroleum ether/EtOAc = 12:1) to afford the product **4a** (157.2 mg, 79% yield).

### 3. Optimization of the reaction conditions

Our study commenced with the reaction of benzaldehyde (**1-1**), p-toluidine (**2a**), and indole (**3a**) in present of Lewis or Bronsted acid (Supplementary Table 1). Unfortunately, after several varied conditions were tried, we did not obtain any aza-seven-membered ring adducts (Supplementary Table 1, entry 1). Attempts to use *in situ* generated benzaldehyde species from either phenylmethanol (**1-2**) or benzyl halide (**1-3**) in I<sub>2</sub>-DMSO system in present of TfOH turns out to be a failure (Supplementary Table 1, entries 2-3). Phenylglycine (**1a**) was then tested as a substrate under similar conditions since it was reported by our previous work<sup>[1]</sup> that amino acid could be converted to corresponding aldehyde by I<sub>2</sub> mediated Strecker degradation<sup>[2]</sup>. Delightfully, desired azepino[3,4-b]indole product **4a** could be formed in 40% yield (Supplementary Table 1, entry 4). Encouraged by this result, we turn to optimize the reaction conditions by increased the dose of iodine. A much higher yield (75%) was detected when 2.5 equiv of I<sub>2</sub> was used (Supplementary Table 1, entries 5–11). Changing the amount of TfOH did not increase the yield (Supplementary Table 1, entries 12–15), and only a trace of **4a** could be observed when TfOH was not present (Supplementary Table 1, entry 16). Next, we tried a variety of different Brønsted and Lewis acids, but none improved yield was obtained (Supplementary Table 1, entries 17–24). We also found that the yield of **4a** is better when the reaction is performed at 120 °C and the amount of by-products is significantly reduced (Supplementary Table 1, entries 25–30). Upon optimizing the type and amount of acid, the temperature, and the iodine loading, we derived the following conditions: I<sub>2</sub> (2.5 equiv), TfOH (0.2 equiv), at 120 °C for 12 h under air. More importantly, in the whole process of carefully screening, we did not isolate any competitive aza-[3+2] or aza-[4+2] products under our conditions (Supplementary Table 1, **8a** and **8b** were not detected), although some other unwanted by-products were found (Supplementary Table 1, **8c** see reference 1d, **8d** was unambiguously conformed by X-ray crystallographic analysis ).

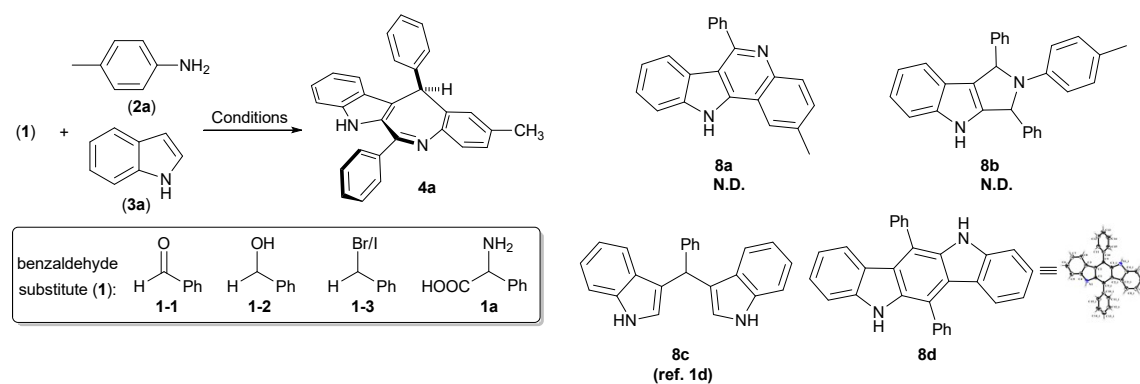

| entry           | <b>1</b>   | catalyst (equiv)           | I <sub>2</sub> (equiv) | temp(°C) | yield <sup>a</sup> (%) |
|-----------------|------------|----------------------------|------------------------|----------|------------------------|
| 1               | <b>1-1</b> | TfOH(0.2)                  | -                      | 100      | N.D.                   |
| 2               | <b>1-2</b> | TfOH(0.2)                  | I <sub>2</sub> (1.0)   | 100      | N.D.                   |
| 3               | <b>1-3</b> | TfOH(0.2)                  | I <sub>2</sub> (1.0)   | 100      | N.D.                   |
| 4               | <b>1a</b>  | TfOH(0.2)                  | I <sub>2</sub> (1.0)   | 100      | 40                     |
| 5 <sup>b</sup>  | <b>1a</b>  | TfOH(0.2)                  | I <sub>2</sub> (0.1)   | 100      | 8                      |
| 6 <sup>b</sup>  | <b>1a</b>  | TfOH(0.2)                  | I <sub>2</sub> (0.2)   | 100      | 11                     |
| 7               | <b>1a</b>  | TfOH(0.2)                  | I <sub>2</sub> (0.5)   | 100      | 16                     |
| 8               | <b>1a</b>  | TfOH(0.2)                  | I <sub>2</sub> (1.5)   | 100      | 56                     |
| 9               | <b>1a</b>  | TfOH(0.2)                  | I <sub>2</sub> (2.0)   | 100      | 68                     |
| 10              | <b>1a</b>  | TfOH(0.2)                  | I <sub>2</sub> (2.5)   | 100      | 75                     |
| 11              | <b>1a</b>  | TfOH(0.2)                  | I <sub>2</sub> (3.0)   | 100      | 71                     |
| 12              | <b>1a</b>  | TfOH(0.02)                 | I <sub>2</sub> (2.5)   | 100      | 16                     |
| 13              | <b>1a</b>  | TfOH(0.1)                  | I <sub>2</sub> (2.5)   | 100      | 42                     |
| 14              | <b>1a</b>  | TfOH(0.3)                  | I <sub>2</sub> (2.5)   | 100      | 71                     |
| 15              | <b>1a</b>  | TfOH(0.4)                  | I <sub>2</sub> (2.5)   | 100      | 69                     |
| 16 <sup>b</sup> | <b>1a</b>  | -                          | I <sub>2</sub> (2.5)   | 100      | trace                  |
| 17              | <b>1a</b>  | TsOH(0.2)                  | I <sub>2</sub> (2.5)   | 100      | 66                     |
| 18              | <b>1a</b>  | TFA(0.2)                   | I <sub>2</sub> (2.5)   | 100      | 8                      |
| 19 <sup>c</sup> | <b>1a</b>  | HI(2.0)                    | I <sub>2</sub> (2.5)   | 100      | trace                  |
| 20              | <b>1a</b>  | CuCl <sub>2</sub> (0.2)    | I <sub>2</sub> (2.5)   | 100      | 14                     |
| 21              | <b>1a</b>  | FeCl <sub>3</sub> (0.2)    | I <sub>2</sub> (2.5)   | 100      | 20                     |
| 22              | <b>1a</b>  | InBr <sub>3</sub> (0.2)    | I <sub>2</sub> (2.5)   | 100      | 49                     |
| 23              | <b>1a</b>  | GaBr <sub>3</sub> (0.2)    | I <sub>2</sub> (2.5)   | 100      | 58                     |
| 24              | <b>1a</b>  | Ga(OTf) <sub>3</sub> (0.2) | I <sub>2</sub> (2.5)   | 100      | 68                     |
| 25              | <b>1a</b>  | TfOH(0.2)                  | I <sub>2</sub> (2.5)   | r.t.     | n.d.                   |
| 26              | <b>1a</b>  | TfOH(0.2)                  | I <sub>2</sub> (2.5)   | 40       | n.d.                   |



|    |           |           |                      |     |       |
|----|-----------|-----------|----------------------|-----|-------|
| 27 | <b>1a</b> | TfOH(0.2) | I <sub>2</sub> (2.5) | 60  | trace |
| 28 | <b>1a</b> | TfOH(0.2) | I <sub>2</sub> (2.5) | 80  | 52    |
| 29 | <b>1a</b> | TfOH(0.2) | I <sub>2</sub> (2.5) | 120 | 79    |
| 30 | <b>1a</b> | TfOH(0.2) | I <sub>2</sub> (2.5) | 140 | 73    |

### Supplementary Table 1. Optimization of Reaction Conditions<sup>a,b</sup>

<sup>a</sup>Reaction conditions: **1a** (1.0 mmol), **2a** (0.5 mmol), **3a** (0.5 mmol), I<sub>2</sub>, catalyst, and DMSO (3.0 mL, *c* 0.17 M) were added to a pressure vessel and stirred for 12 h. N. D. refers to not detected. Yields refer to isolated product. <sup>b</sup>The reaction time was extended to 48 h. <sup>c</sup>Using HI, 50 wt % solution in H<sub>2</sub>O.

## 4. Mechanistic studies

### 4.1 Studies of Different Additives

Based on the experimental observation that benzaldehyde is not converted into **4a** under our reaction conditions while its amino acid precursor is, we speculated that the by-products in I<sub>2</sub>-mediated Strecker degradation, i.e., ammonia and HI, would somehow participate in and promote the whole transformation. Indeed, when *p*-methoxybenzaldehyde **7h** instead of an amino acid was reacted with **2a** and **3a** under standard conditions, **4h** was obtained in less than 5% yield (Supplementary Table 2, entry 1). However, when ammonium iodide was added to the reaction mixture, azepino[3,4-*b*]indole **4h** was generated in 62% yield (Supplementary Table 2, entry 2). Tetramethylammonium iodide (TMAI) and tetrabutylammonium iodide (TBAI) were also found to promote the reaction, but with a lower yield (Supplementary Table 2, entries 3-4). We also tried other iodine anion compounds (Supplementary Table 2, entries 5-6), inorganic ammonium salts (Supplementary Table 2, entries 7-9), ammonia spirit (Supplementary Table 2, entry 10) and alkyl amines (Supplementary Table 2, entries 11-13), but other additives with different ion-pair combinations showed much lower reactivities.

Because of the high catalytic reactivity and metal-free nature of ion-pairs, numerous new organic ion-pair species have been reported for various transformations, especially asymmetric catalysis.<sup>[3]</sup> We speculated that when benzaldehyde **7h** was used to replace amino acid, the process of iodine-promoted amino acid catabolism would be absent, so that a large amount of iodine anions couldn't be produced in the solvent. Therefore, the above ammonium source couldn't have a good effect. The above process implied that the *in-situ* generated endogenous by-product ammonium iodide acted as ion-pair promoters.

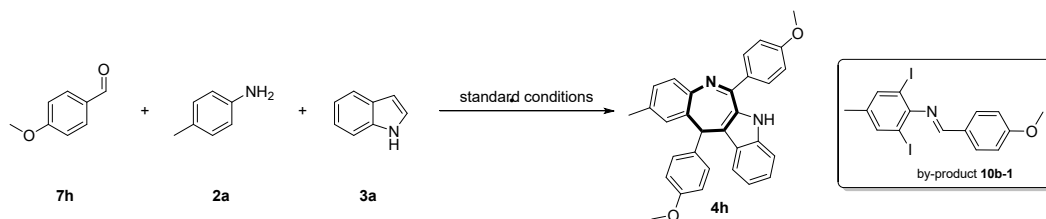

| entry | additive (equiv)                        | yield <sup>a</sup> (%) |
|-------|-----------------------------------------|------------------------|
| 1     | -                                       | 5                      |
| 2     | NH <sub>4</sub> I(1.0)                  | 62                     |
| 3     | (CH <sub>3</sub> ) <sub>4</sub> Ni(1.0) | 56                     |
| 4     | ( <i>n</i> -Bu) <sub>4</sub> Ni(1.0)    | 52                     |
| 5     | NaI(1.0)                                | 18                     |
| 6     | KI(1.0)                                 | 19                     |
| 7     | (Et) <sub>3</sub> N(1.0)                | trace                  |
| 8     | DIPEA(1.0)                              | trace                  |
| 9     | ( <i>n</i> -Pr) <sub>3</sub> N(1.0)     | trace                  |
| 10    | NH <sub>3</sub> ·H <sub>2</sub> O(1.0)  | 15                     |
| 11    | NH <sub>4</sub> Cl(1.0)                 | 13                     |
| 12    | NH <sub>4</sub> Br(1.0)                 | 11                     |
| 13    | NH <sub>4</sub> OAc(1.0)                | 18                     |

### Supplementary Table 2. Optimization of additives <sup>a,b</sup>

<sup>a</sup>Reaction conditions: **7h** (1.0 mmol), **2a** (0.5 mmol), **3a** (0.5 mmol), I<sub>2</sub> (1.25 mmol), TfOH (0.1 mmol), additives and DMSO (3.0 mL, *c* 0.17 M) were added to a pressure vessel and stirred at 120 °C for 12 h. Yields refer to isolated product.

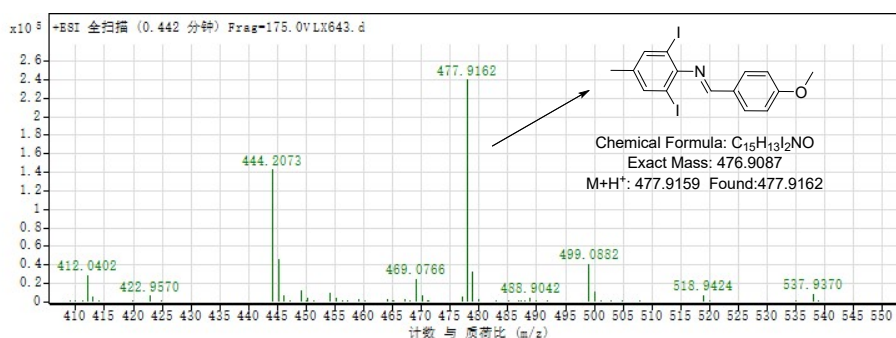

Supplementary Figure 1. Detection for the generation of **10b-1**

After monitoring the reaction in Supplementary Table 2, we found that most of attempts gave relative messy results. We found that in Supplementary Table 2 entry 1, the main product is the iodinated imine **10b-1** in around 40% yield. This by-product was also detected in other entries in Table 2. We believe that due to the lack of ammonium iodide, the indole cation cannot be stably produced in the reaction, resulting in the continuous formation of imines that are continuously oxidized by iodine. It is notable that the 3,3'-(phenylmethylene)bis(1H-indole) product was also not detected in those experiments.

#### 4.2 Studies of intermediates **8b** and **9b**

**1a** (1.0 mmol), **2a** (0.5 mmol), **3a** (0.5 mmol), I<sub>2</sub> (1.25 mmol), TfOH (0.1 mmol) and DMSO (3.0 mL, *c* 0.17 M) reacted at 120 °C for 0.5 h, obtained the intermediates **8b** and **9b**(detected by LC-MS), then could converted to **4a** after 12h under standard conditions. Obviously, **8b** and **9b** are possible intermediates for this protocol.

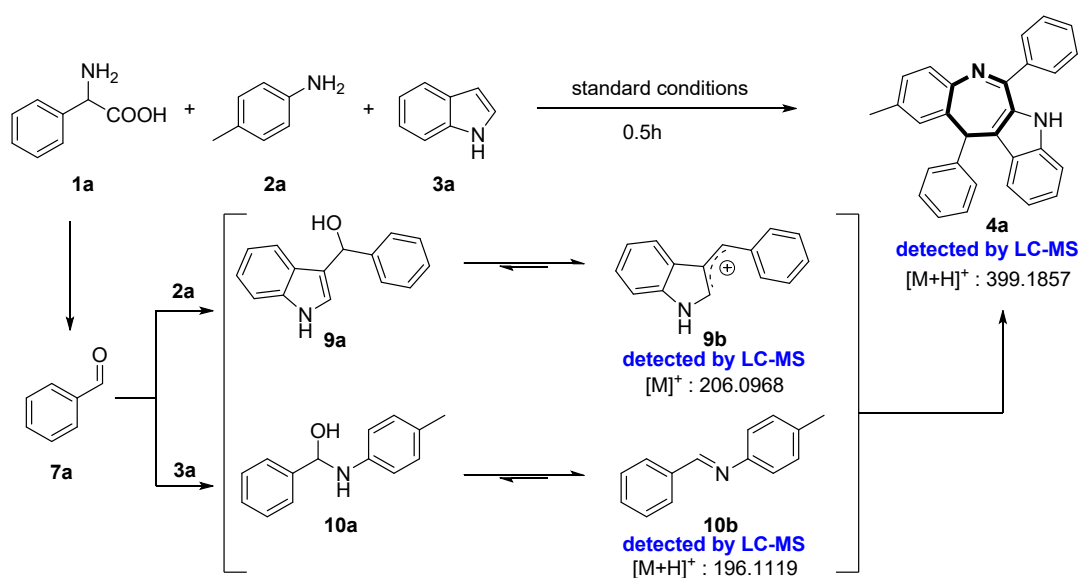

The LC-MS Spectra is listed below:

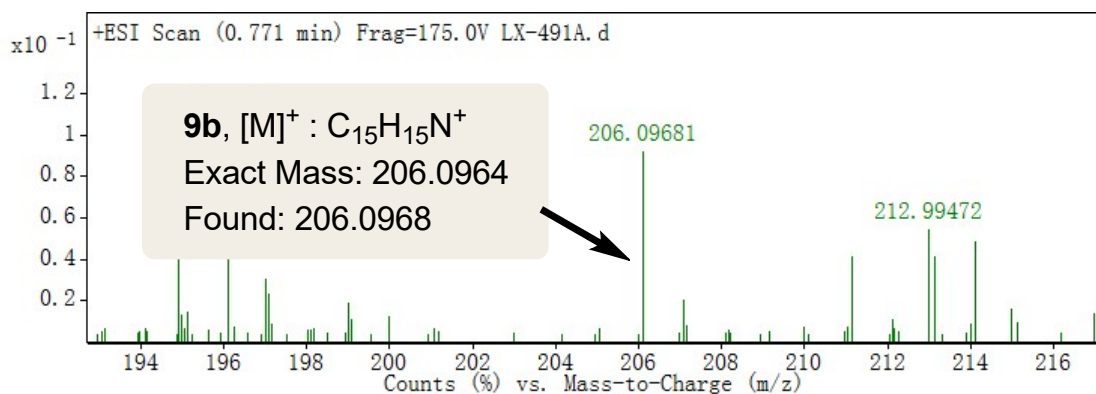

Supplementary Figure 2. Detection for the generation of **9b**

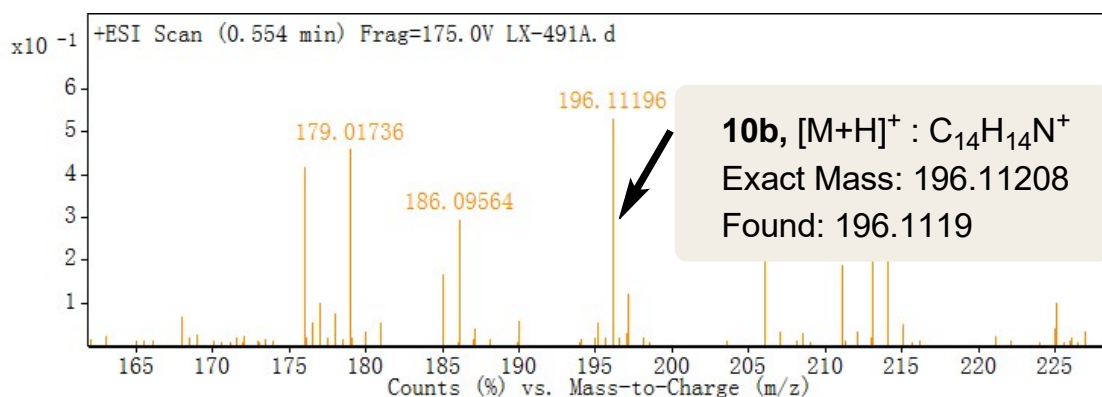

**Supplementary Figure 3. Detection for the generation of 10b**

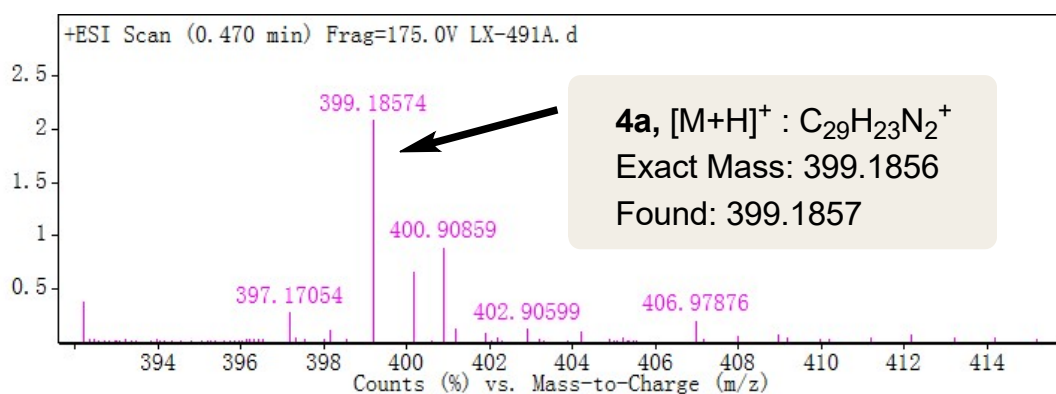

**Supplementary Figure 4. Detection for the generation of 4a**

## 4.2 Studies of cross-coupling reaction

We investigated the cross-coupling reaction using **1a** (0.5 mmol), **7b** (0.5 mmol), **2a** (0.5 mmol) and **3a** (0.5 mmol) under the standard conditions. All the products were successfully identified by LC-MS analysis of the crude reaction extract, including the crossed products **4ab** and **4ba**.

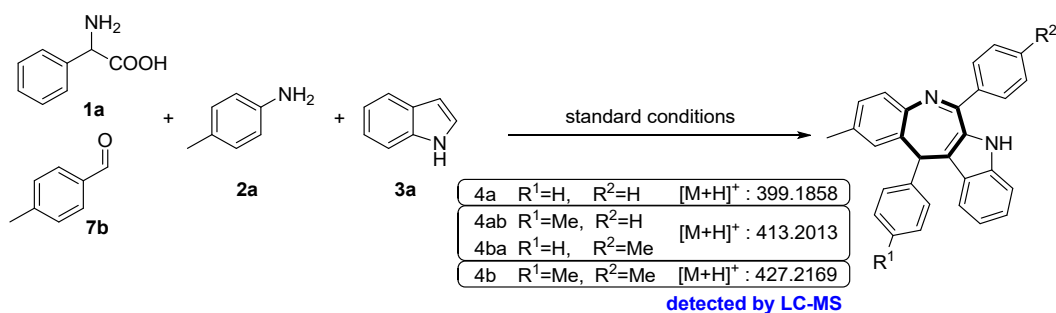

The LC-MS Spectra is listed below:

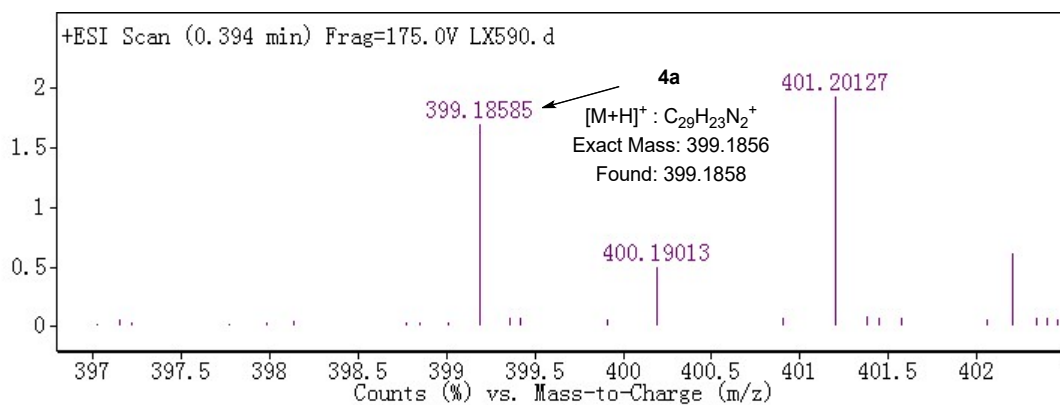

**Supplementary Figure 5. Detection for the generation of 4a**

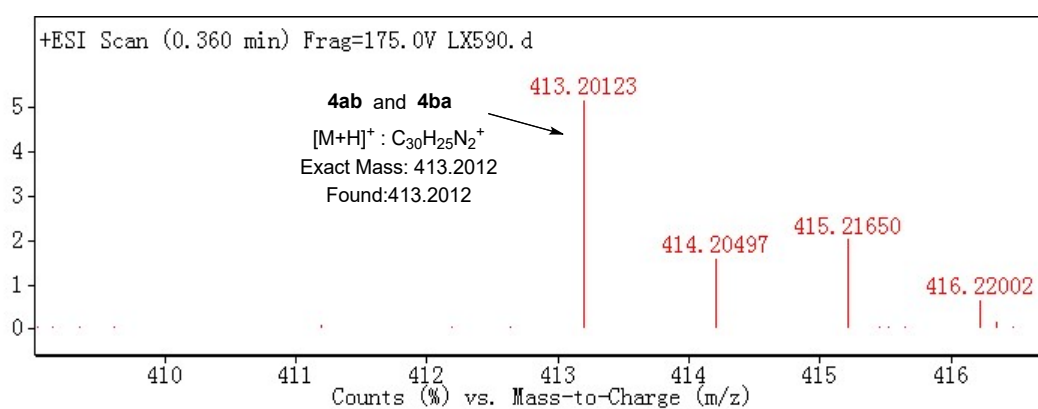

**Supplementary Figure 6. Detection for the generation of 4ab and 4ba**

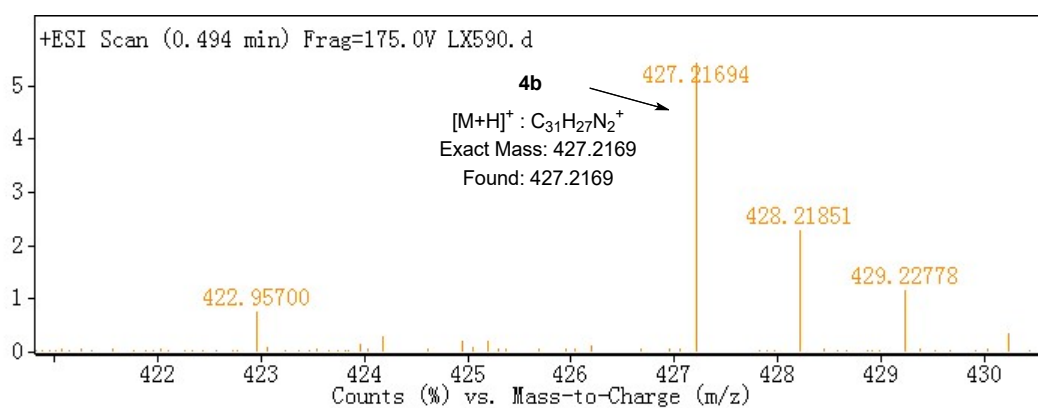

**Supplementary Figure 7. Detection for the generation of 4b**

Then we investigated the cross-coupling reaction using **1a** (0.5 mmol), **7h** (0.5 mmol), **2a** (0.5 mmol) and **3a** (0.5 mmol) under the standard conditions. All the products were successfully identified by LC-MS analysis of the crude reaction extract, including the crossed products **4ah** and **4ha**.

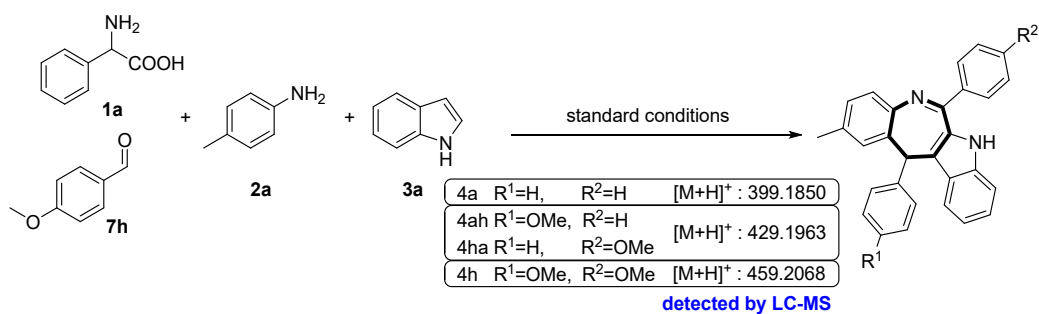

The LC-MS Spectra is listed below:

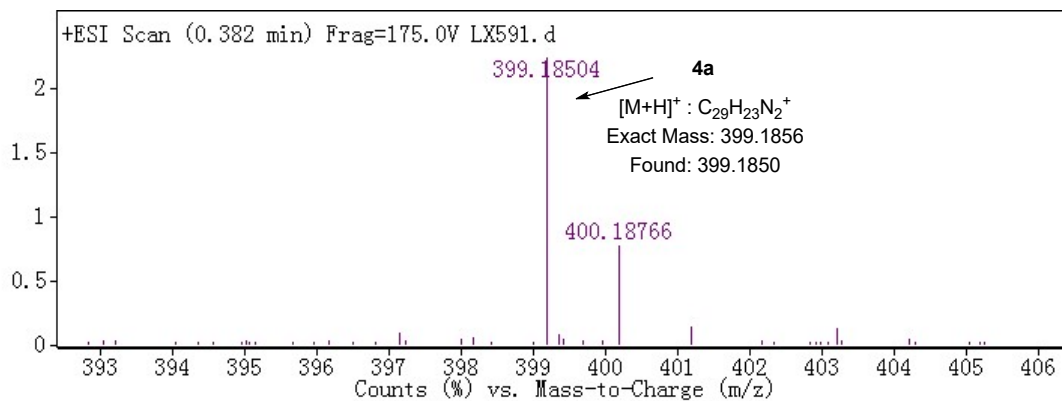

Supplementary Figure 8. Detection for the generation of 4a

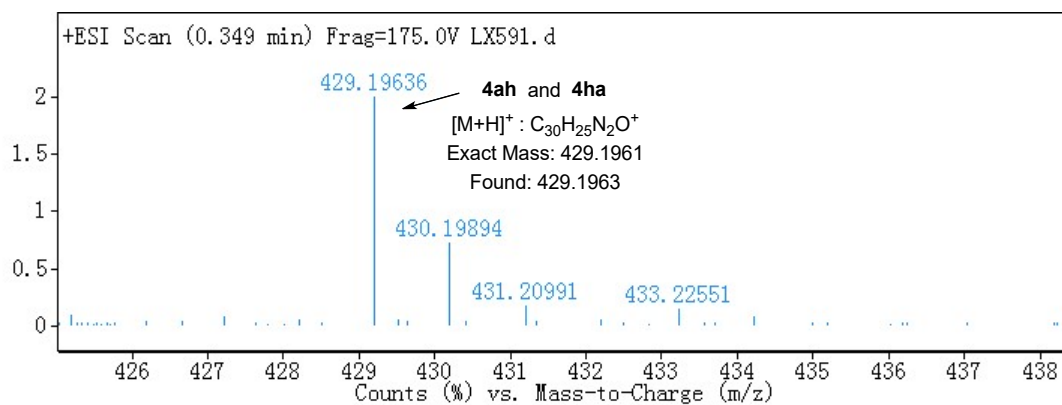

Supplementary Figure 9. Detection for the generation of 4ah and 4ha

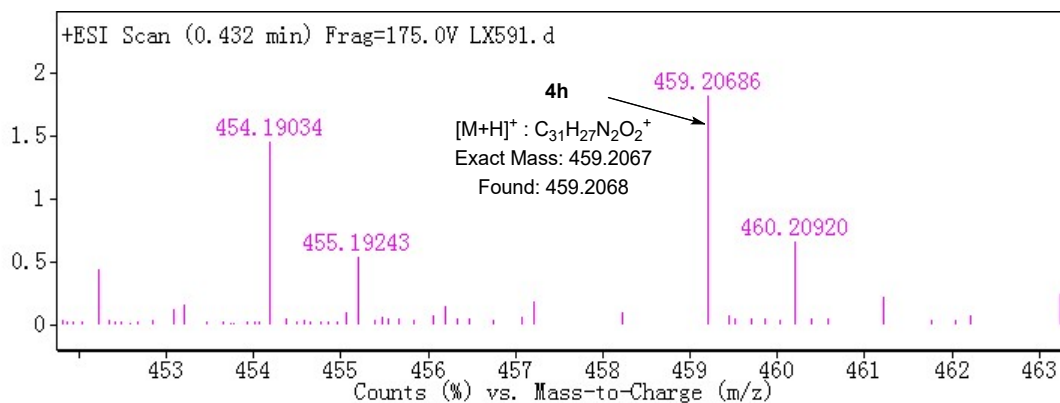

**Supplementary Figure 10. Detection for the generation of 4h**

Next we investigated the cross-coupling reaction using **1a** (0.5 mmol), **1m** (0.5 mmol), **2a** (0.5 mmol) and **3a** (0.5 mmol) under the standard conditions. All the products were successfully identified by LC-MS analysis of the crude reaction extract, including the crossed products **4am** and **4ma**.

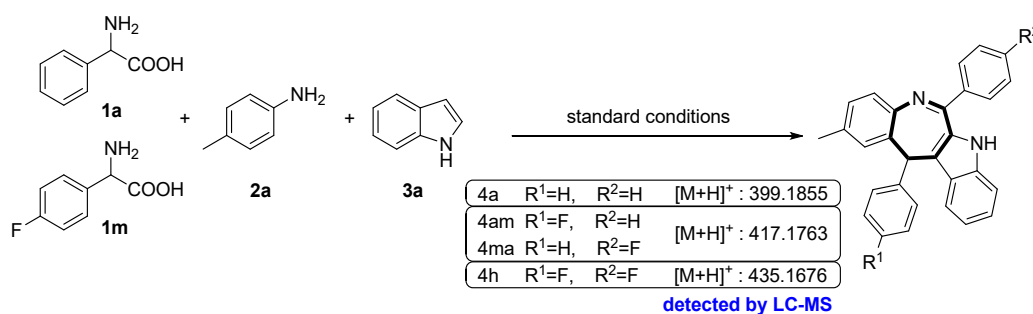

The LC-MS Spectra is listed below:

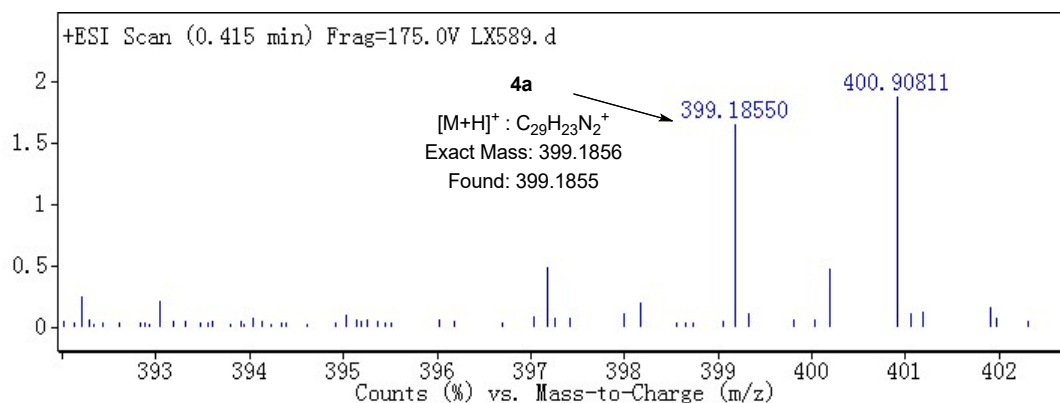

**Supplementary Figure 11. Detection for the generation of 4a**

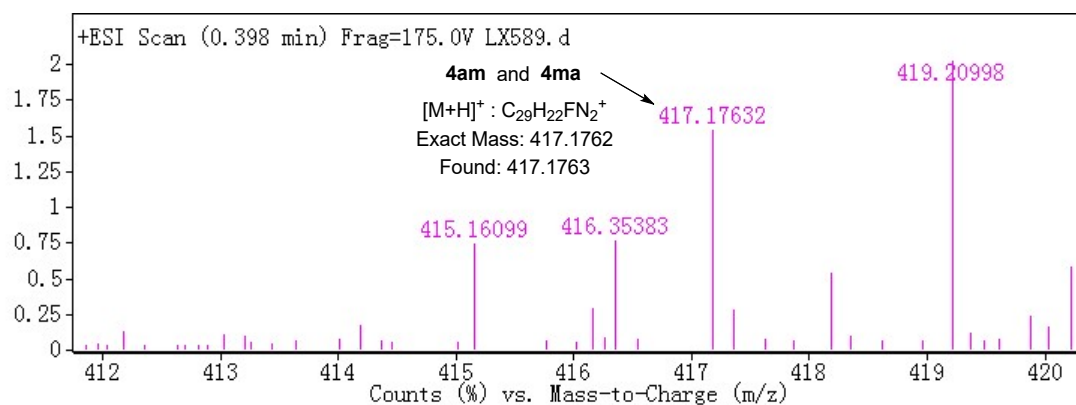

**Supplementary Figure 12. Detection for the generation of 4am and 4ma**

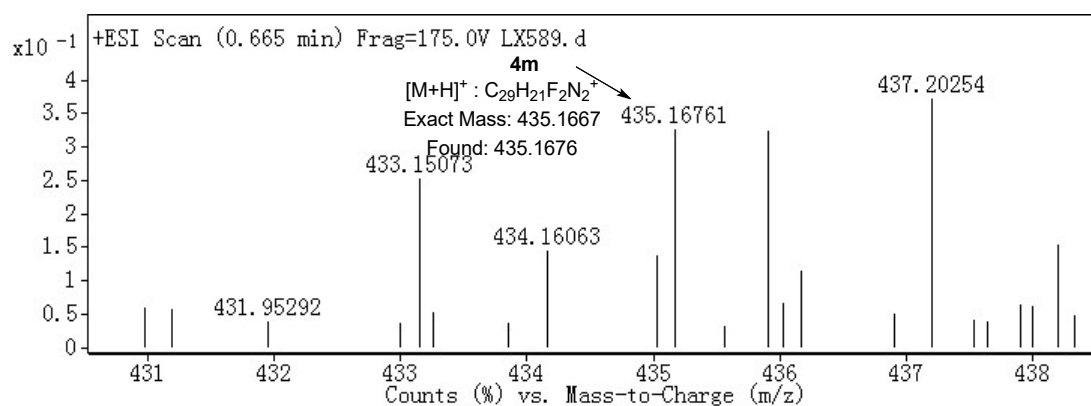

**Supplementary Figure 13. Detection for the generation of 4m**

Obviously, the above three sets of cross-coupling reactions clearly confirms our proposed mechanism by LC-MS analysis. In the presence of iodine-mediated amino acid catabolism, endogenous ammonium iodide can be obtained in the system, and aldehyde can participate in the consecutive reaction. On the one hand, it shows that amino acid is first catabolized into aldehyde and then participate in the subsequent process. On the other hand, it proves that endogenous ammonium iodide is indispensable to the reaction system.

## 5. Characterization data for compounds 4, 5 and 6.



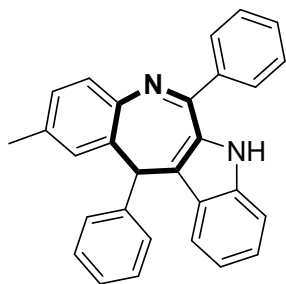

**10-methyl-6,12-di-p-tolyl-5,12-dihydrobenzo[6,7]azepino[3,4-b]indole (4a)**

Yield 79%; 157.2 mg; yellow solid; column chromatography, silica gel (PE/EA, 12:1); mp 113-115 °C;

<sup>1</sup>H NMR (400 MHz, CDCl<sub>3</sub>) δ 8.09 (s, 1H), 7.96 (d, *J* = 8.0 Hz, 1H), 7.76–7.70 (m, 2H), 7.52 (d, *J* = 8.0 Hz, 1H), 7.42 (d, *J* = 6.8 Hz, 3H), 7.33 (d, *J* = 3.6 Hz, 2H), 7.28 (s, 1H), 7.25 (d, *J* = 2.8 Hz, 1H), 7.19 (d, *J* = 8.0 Hz, 1H), 7.06–6.93 (m, 5H), 5.73 (s, 1H), 2.42 (s, 3H).

<sup>13</sup>C NMR (100 MHz, CDCl<sub>3</sub>) δ 156.0, 143.6, 141.8, 139.2, 137.6, 136.8, 134.7, 130.4, 130.2, 129.5, 129.1, 128.5, 127.9, 127.8, 126.9, 126.8, 126.5, 126.3, 126.0, 125.0, 120.5, 119.2, 111.6, 45.2, 21.0.

HRMS (ESI) *m/z* calcd for C<sub>29</sub>H<sub>23</sub>N<sub>2</sub><sup>+</sup> (M+H)<sup>+</sup> 399.1856, found: 399.1858.

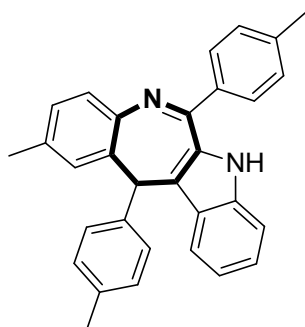

**10-methyl-6,12-di-p-tolyl-5,12-dihydrobenzo[6,7]azepino[3,4-b]indole (4b)**

Yield 77%; 164.0 mg; yellow solid; column chromatography, silica gel (PE/EA, 12:1); mp 245-247 °C;

<sup>1</sup>H NMR (400 MHz, CDCl<sub>3</sub>) δ 8.11 (s, 1H), 7.89 (d, *J* = 8.0 Hz, 1H), 7.63 (d, *J* = 8.0 Hz, 2H), 7.43 (d, *J* = 8.0 Hz, 1H), 7.26–7.12 (m, 7H), 6.82 (s, 4H), 5.65 (s, 1H), 2.40 (s, 3H), 2.35 (s, 3H), 2.12 (s, 3H);

<sup>13</sup>C NMR (100 MHz, CDCl<sub>3</sub>) δ 156.0, 143.6, 140.3, 138.7, 137.2, 136.6, 136.4, 135.4, 135.2, 130.2, 129.3, 129.1, 128.5, 127.7, 126.8, 126.7, 126.2, 124.7, 120.3, 119.0, 111.6, 44.9, 21.4, 20.9, 20.8;

HRMS (ESI) *m/z* calcd for C<sub>31</sub>H<sub>27</sub>N<sub>2</sub><sup>+</sup> (M+H)<sup>+</sup> 427.2168, found 427.2169

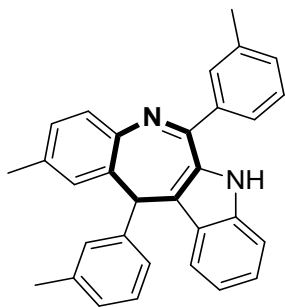

**10-methyl-6,12-di-m-tolyl-5,12-dihydrobenzo[6,7]azepino[3,4-b]indole (4c)**

Yield 76%, 161.9 mg; yellow solid; column chromatography, silica gel (PE/EA, 12:1); mp 103-104°C;

<sup>1</sup>H NMR (400 MHz, CDCl<sub>3</sub>) δ 8.09 (s, 1H), 7.94 (d, *J* = 8.0 Hz, 1H), 7.61 (s, 1H), 7.49 (t, *J* = 7.6 Hz, 2H), 7.35–7.26 (m, 5H), 7.25 (s, 1H), 7.18 (d, *J* = 8.0 Hz, 1H), 6.93 (t, *J* = 8.0 Hz, 1H), 6.82–6.75 (m, 3H), 5.68 (s, 1H), 2.42 (s, 3H), 2.39 (s, 3H), 2.10 (s, 3H).

<sup>13</sup>C NMR (100 MHz, CDCl<sub>3</sub>) δ 156.2, 143.6, 141.6, 139.2, 138.4, 137.4, 137.2, 136.7, 135.1, 131.0, 130.3, 129.6, 129.4, 128.3, 127.8, 127.7, 127.5, 126.9, 126.8, 126.4, 126.3, 126.0, 124.9, 124.2, 120.4, 119.2, 111.6, 45.2, 21.45, 21.38, 21.0;

HRMS (ESI) *m/z* calcd for C<sub>31</sub>H<sub>27</sub>N<sub>2</sub><sup>+</sup> (M+H)<sup>+</sup> 427.2168, found 427.2168

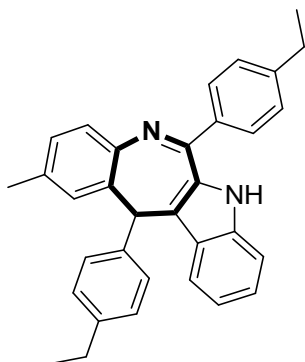

**6,12-bis(4-ethylphenyl)-10-methyl-5,12-dihydrobenzo[6,7]azepino[3,4-b]indole (4d)**

Yield 78%; 177.1 mg; yellow oil; column chromatography, silica gel (PE/EA, 12:1); mp 141-143°C;

<sup>1</sup>H NMR (400 MHz, CDCl<sub>3</sub>) δ 8.10 (s, 1H), 7.90 (d, *J* = 8.0 Hz, 1H), 7.66 (d, *J* = 8.0 Hz, 2H), 7.47 (d, *J* = 8.0 Hz, 1H), 7.25 (dd, *J* = 15.6, 9.6 Hz, 6H), 7.15 (d, *J* = 8.0 Hz, 1H), 6.86 (s, 4H), 5.67 (s, 1H), 2.67 (q, *J* = 7.6 Hz, 2H), 2.43 (d, *J* = 7.6 Hz, 2H), 2.40 (s, 3H), 1.24 (t, *J* = 7.6 Hz, 3H), 1.05 (t, *J* = 7.6 Hz, 3H);

<sup>13</sup>C NMR (100 MHz, CDCl<sub>3</sub>) δ 156.0, 146.7, 143.6, 141.8, 139.0, 137.3, 136.7, 135.1, 130.3, 129.5, 129.3, 128.0, 127.7, 127.3, 126.9, 126.8, 126.3, 126.1, 124.8, 120.3, 119.1, 111.6, 45.0, 28.8, 28.2, 20.9, 15.4;

HRMS (ESI) *m/z* calcd for C<sub>33</sub>H<sub>31</sub>N<sub>2</sub><sup>+</sup> (M+H)<sup>+</sup> 455.2481, found 455.2482.

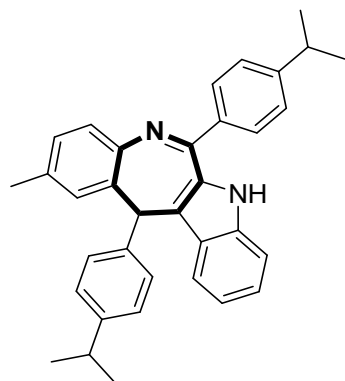

**6,12-bis(4-isopropylphenyl)-10-methyl-5,12-dihydrobenzo[6,7]azepino[3,4-b]indole (4e)**

Yield 72%; 173.5 mg; yellow solid; column chromatography, silica gel (PE/EA, 12:1); mp 212-214 °C;

<sup>1</sup>H NMR (400 MHz, CDCl<sub>3</sub>) δ 8.08 (s, 1H), 7.90 (d, *J* = 8.0 Hz, 1H), 7.68 (d, *J* = 8.0 Hz, 2H), 7.48 (d, *J* = 8.0 Hz, 1H), 7.27 (d, *J* = 7.6 Hz, 5H), 7.22 (t, *J* = 4.0 Hz, 1H), 7.15 (d, *J* = 8.0 Hz, 1H), 6.89 (s, 4H), 5.68 (s, 1H), 2.94 (m, *J* = 13.6, 6.8 Hz, 1H), 2.69 (m, *J* = 13.6, 6.8 Hz, 1H), 2.40 (s, 3H), 1.26 (d, *J* = 6.8 Hz, 6H), 1.07 (d, *J* = 6.8 Hz, 6H).

<sup>13</sup>C NMR (100 MHz, CDCl<sub>3</sub>) δ 156.0, 151.2, 146.4, 143.7, 139.2, 137.3, 137.0, 136.7, 135.0, 130.4, 129.6, 129.3, 127.8, 127.0, 126.8, 126.6, 126.3, 125.9, 124.8, 120.3, 119.2, 111.6, 45.1, 34.1, 33.5, 24.0, 23.9, 23.8, 21.0.

HRMS (ESI) *m/z* calcd for C<sub>35</sub>H<sub>35</sub>N<sub>2</sub><sup>+</sup> (M+H)<sup>+</sup> 483.2794, found 483.2793.

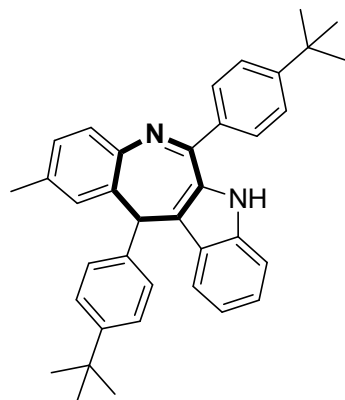

**6,12-bis(4-(tert-butyl)phenyl)-10-methyl-5,12-dihydrobenzo[6,7]azepino[3,4-b]indole (4f)**

Yield 65%; 165.8 mg; yellow solid; column chromatography, silica gel (PE/EA, 12:1); mp 158-160 °C;

<sup>1</sup>H NMR (400 MHz, CDCl<sub>3</sub>) δ 8.13 (s, 1H), 7.91 (d, *J* = 8.0 Hz, 1H), 7.70 (d, *J* = 8.4 Hz, 2H), 7.52 (d, *J* = 8.0 Hz, 1H), 7.45 (d, *J* = 8.4 Hz, 2H), 7.32 (d, *J* = 3.6 Hz, 2H), 7.24 (dd, *J* = 9.6, 6.0 Hz, 2H), 7.16 (d, *J* = 8.0 Hz, 1H), 7.06 (d, *J* = 8.4 Hz, 2H), 6.90 (d, *J* = 8.4 Hz, 2H), 5.70 (s, 1H), 2.41 (s, 3H), 1.34 (s, 9H), 1.14 (s, 9H);

$^{13}\text{C}$  NMR (100 MHz,  $\text{CDCl}_3$ )  $\delta$  156.0, 153.6, 148.7, 143.4, 138.7, 137.5, 136.8, 136.4, 134.9, 130.4, 129.6, 129.0, 127.8, 127.0, 126.5, 126.3, 125.9, 125.5, 125.0, 124.8, 120.4, 119.2, 111.6, 45.0, 34.8, 34.1, 31.2, 21.0;  
HRMS (ESI)  $m/z$  calcd for  $\text{C}_{37}\text{H}_{39}\text{N}_2^+$  ( $\text{M}+\text{H}$ ) $^+$  511.3107, found 511.3111.

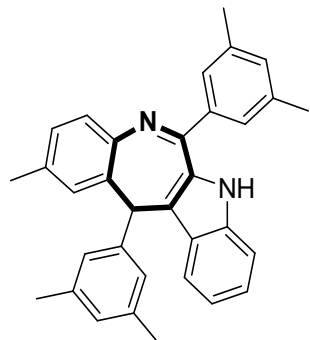

**6,12-bis(3,5-dimethylphenyl)-10-methyl-5,12-dihydrobenzo[6,7]azepino[3,4-b]indole (4g)**

Yield 73%; 165.7 mg; yellow solid; column chromatography, silica gel (PE/EA, 12:1); mp 122-124  $^{\circ}\text{C}$ ;

$^1\text{H}$  NMR (400 MHz,  $\text{CDCl}_3$ )  $\delta$  8.07 (s, 1H), 7.90 (d,  $J = 8.0$  Hz, 1H), 7.45 (d,  $J = 8.0$  Hz, 1H), 7.35 (s, 2H), 7.31 (d,  $J = 4.0$  Hz, 2H), 7.26–7.20 (m, 2H), 7.14 (d,  $J = 8.0$  Hz, 1H), 7.07 (s, 1H), 6.59 (d,  $J = 17.6$  Hz, 3H), 5.63 (s, 1H), 2.41 (s, 3H), 2.34 (s, 6H), 2.05 (s, 6H).

$^{13}\text{C}$  NMR (100 MHz,  $\text{CDCl}_3$ )  $\delta$  156.5, 143.5, 141.5, 139.2, 138.1, 137.2, 137.1, 136.7, 135.6, 131.9, 130.2, 129.2, 127.8, 127.6, 127.0, 126.9, 126.2, 125.8, 124.9, 124.7, 120.3, 119.2, 111.6, 45.0, 21.3, 21.2, 21.0;

HRMS (ESI)  $m/z$  calcd for  $\text{C}_{33}\text{H}_{31}\text{N}_2^+$  ( $\text{M}+\text{H}$ ) $^+$  455.2481, found 455.2482.

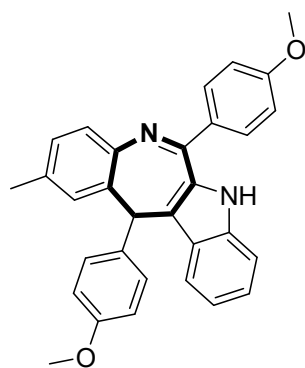

**6,12-bis(4-methoxyphenyl)-10-methyl-5,12-dihydrobenzo[6,7]azepino[3,4-b]indole (4h)**

Yield 81%; 185.5 mg; yellow solid; column chromatography, silica gel (PE/EA, 8:1); mp 158-160  $^{\circ}\text{C}$ ;

$^1\text{H}$  NMR (400 MHz,  $\text{CDCl}_3$ )  $\delta$  8.17 (s, 1H), 7.94 (d,  $J = 8.0$  Hz, 1H), 7.71 (d,  $J = 8.8$  Hz, 2H), 7.48 (d,  $J = 8.0$  Hz, 1H), 7.32 (d,  $J = 3.6$  Hz, 2H), 7.25 (s, 2H),

7.16 (d,  $J = 8.0$  Hz, 1H), 6.91 (d,  $J = 8.8$  Hz, 2H), 6.85 (d,  $J = 8.8$  Hz, 2H), 6.56 (d,  $J = 8.8$  Hz, 2H), 5.65 (s, 1H), 3.82 (s, 3H), 3.61 (s, 3H), 2.41 (s, 3H);  
 $^{13}\text{C}$  NMR (100 MHz,  $\text{CDCl}_3$ )  $\delta$  161.4, 157.7, 155.6, 143.4, 137.2, 136.7, 135.2, 133.9, 131.6, 130.8, 130.2, 129.2, 127.84, 127.77, 126.8, 126.6, 126.2, 124.9, 120.4, 119.1, 113.9, 113.2, 111.6, 55.4, 55.1, 44.5, 21.0;  
HRMS (ESI)  $m/z$  calcd for  $\text{C}_{31}\text{H}_{27}\text{N}_2\text{O}_2^+$  ( $\text{M}+\text{H}$ ) $^+$  459.2067, found 459.2067.

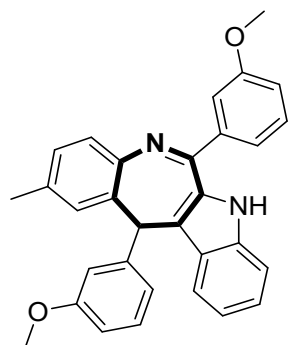

**6,12-bis(3-methoxyphenyl)-10-methyl-5,12-dihydrobenzo[6,7]azepino[3,4-b]indole (4i)**

Yield 78%; 178.6 mg; yellow solid; column chromatography, silica gel (PE/EA, 8:1);

mp 228-230 °C;

$^1\text{H}$  NMR (400 MHz,  $\text{CDCl}_3$ )  $\delta$  8.15 (s, 1H), 7.91 (d,  $J = 8.0$  Hz, 1H), 7.49 (d,  $J = 7.6$  Hz, 1H), 7.35–7.16 (m, 8H), 7.01–6.91 (m, 2H), 6.59–6.48 (m, 3H), 5.68 (s, 1H), 3.82 (s, 3H), 3.55 (s, 3H), 2.41 (s, 3H);

$^{13}\text{C}$  NMR (100 MHz,  $\text{CDCl}_3$ )  $\delta$  159.7, 159.1, 155.8, 143.5, 143.4, 140.6, 137.6, 136.8, 134.8, 130.3, 129.53, 129.46, 128.7, 127.8, 126.8, 126.2, 125.8, 125.0, 121.7, 120.5, 119.5, 119.1, 116.2, 114.0, 113.5, 111.6, 110.9, 55.4, 55.0, 45.2, 21.0;

HRMS (ESI)  $m/z$  calcd for  $\text{C}_{31}\text{H}_{27}\text{N}_2\text{O}_2^+$  ( $\text{M}+\text{H}$ ) $^+$  459.2067, found 459.2068.

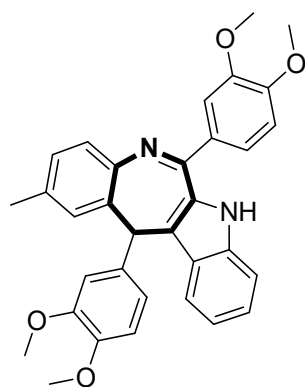

**6,12-bis(3,4-dimethoxyphenyl)-10-methyl-5,12-dihydrobenzo[6,7]azepino[3,4-b]indole (4j)**

Yield 70%; 181.3 mg; yellow solid; column chromatography, silica gel (PE/EA, 5:1);

mp 261-263 °C;

**<sup>1</sup>H NMR (400 MHz, CDCl<sub>3</sub>)** δ 8.60 (s, 1H), 7.94 (d, *J* = 8.0 Hz, 1H), 7.48 (d, *J* = 7.2 Hz, 2H), 7.37 (dd, *J* = 15.6, 7.6 Hz, 2H), 7.26 (d, *J* = 8.4 Hz, 2H), 7.23–7.15 (m, 2H), 6.79 (d, *J* = 8.4 Hz, 1H), 6.53 (d, *J* = 7.2 Hz, 3H), 5.67 (s, 1H), 3.90 (s, 3H), 3.85 (s, 3H), 3.67 (s, 3H), 3.54 (s, 3H), 2.41 (s, 3H);

**<sup>13</sup>C NMR (100 MHz, CDCl<sub>3</sub>)** δ 155.7, 150.8, 148.9, 148.3, 147.3, 143.3, 137.2, 136.7, 135.4, 134.5, 131.9, 130.1, 129.2, 127.7, 126.7, 126.1, 125.8, 124.8, 122.7, 120.3, 119.2, 119.0, 111.7, 111.4, 110.7, 110.6, 110.2, 55.82, 55.79, 55.76, 55.7, 45.0, 20.9;

HRMS (ESI) *m/z* calcd for C<sub>33</sub>H<sub>31</sub>N<sub>2</sub>O<sub>4</sub><sup>+</sup> (M+H)<sup>+</sup> 519.2278, found 519.2280.

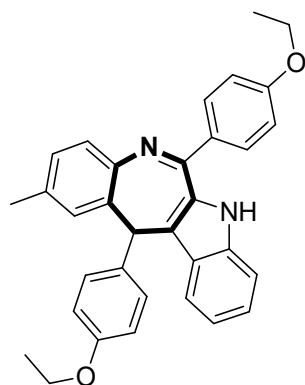

**6,12-bis(4-ethoxyphenyl)-10-methyl-5,12-dihydrobenzo[6,7]azepino[3,4-b]indole (4k)**

Yield 74%; 179.8 mg; yellow solid; column chromatography, silica gel (PE/EA, 8:1);

mp 154-156 °C;

**<sup>1</sup>H NMR (400 MHz, CDCl<sub>3</sub>)** δ 8.16 (s, 1H), 7.91 (d, *J* = 8.0 Hz, 1H), 7.68 (d, *J* = 8.8 Hz, 2H), 7.43 (d, *J* = 8.0 Hz, 1H), 7.29–7.21 (m, 4H), 7.14 (d, *J* = 8.0 Hz, 1H), 6.85 (dd, *J* = 17.6, 8.8 Hz, 4H), 6.54 (d, *J* = 8.8 Hz, 2H), 5.63 (s, 1H), 4.02 (d, *J* = 7.2 Hz, 2H), 3.80 (dd, *J* = 7.2, 3.2 Hz, 2H), 2.39 (s, 3H), 1.40 (t, *J* = 7.2 Hz, 3H), 1.25 (t, *J* = 7.2 Hz, 3H);

**<sup>13</sup>C NMR (100 MHz, CDCl<sub>3</sub>)** δ 160.7, 157.0, 155.6, 143.6, 137.0, 136.6, 135.2, 133.8, 131.6, 130.7, 130.2, 129.2, 127.8, 127.7, 126.8, 126.4, 126.2, 124.8, 120.3, 119.0, 114.4, 113.8, 111.6, 63.6, 63.2, 44.5, 21.0, 14.8;

HRMS (ESI) *m/z* calcd for C<sub>33</sub>H<sub>31</sub>N<sub>2</sub>O<sub>2</sub><sup>+</sup> (M+H)<sup>+</sup> 487.2380, found 487.2376.

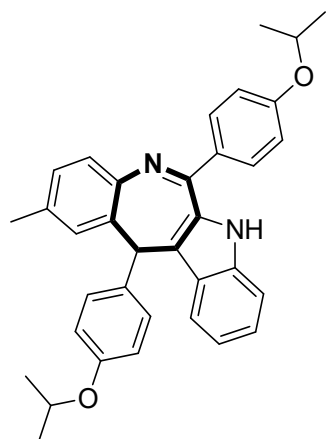

**6,12-bis(4-isopropoxyphenyl)-10-methyl-5,12-dihydrobenzo[6,7]azepino[3,4-b]indole (4l)**

Yield 65%; 167.1 mg; yellow solid; column chromatography, silica gel (PE/EA, 8:1);

mp 141-143 °C;

**<sup>1</sup>H NMR (400 MHz, CDCl<sub>3</sub>)** δ 8.14 (s, 1H), 7.93 (d, *J* = 8.0 Hz, 1H), 7.68 (d, *J* = 8.8 Hz, 2H), 7.46 (d, *J* = 8.0 Hz, 1H), 7.30 (d, *J* = 3.6 Hz, 2H), 7.24 (s, 2H), 7.15 (d, *J* = 8.0 Hz, 1H), 6.89 (d, *J* = 8.8 Hz, 2H), 6.83 (d, *J* = 8.4 Hz, 2H), 6.55 (d, *J* = 8.8 Hz, 2H), 5.64 (s, 1H), 4.60 (dd, *J* = 12.0, 6.0 Hz, 1H), 4.32 (m, *J* = 12.0, 6.0 Hz, 1H), 2.40 (s, 3H), 1.35 (dd, *J* = 6.0, 3.6 Hz, 6H), 1.17 (dd, *J* = 6.0, 1.6 Hz, 6H);

**<sup>13</sup>C NMR (100 MHz, CDCl<sub>3</sub>)** δ 159.8, 156.0, 155.7, 143.6, 137.1, 136.6, 135.2, 133.8, 131.5, 130.7, 130.2, 129.3, 127.9, 127.8, 126.9, 126.4, 126.2, 124.8, 120.4, 119.1, 115.6, 115.3, 111.6, 70.0, 69.7, 44.5, 22.04, 21.96, 21.0;

HRMS (ESI) *m/z* calcd for C<sub>35</sub>H<sub>35</sub>N<sub>2</sub>O<sub>2</sub><sup>+</sup> (M+H)<sup>+</sup> 515.2693, found 515.2694.

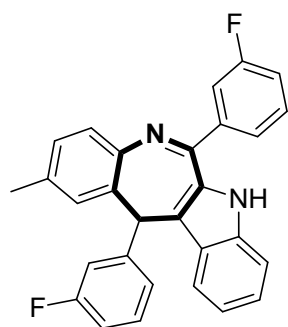

**6,12-bis(3-fluorophenyl)-10-methyl-5,12-dihydrobenzo[6,7]azepino[3,4-b]indole (4m)**

Yield 77%; 167.1 mg; yellow solid; column chromatography, silica gel (PE/EA, 12:1); mp 123-125 °C;

**<sup>1</sup>H NMR (400 MHz, CDCl<sub>3</sub>)** δ 8.12 (s, 1H), 7.94 (d, *J* = 8.0 Hz, 1H), 7.55–7.47 (m, 3H), 7.39 (dd, *J* = 14.4, 6.0 Hz, 3H), 7.29–7.21 (m, 3H), 7.15 (dd, *J* = 12.0, 4.8 Hz, 1H), 7.00 (d, *J* = 6.4 Hz, 1H), 6.77–6.55 (m, 3H), 5.69 (s, 1H), 2.43 (s, 3H);

**<sup>13</sup>C NMR (100 MHz, CDCl<sub>3</sub>)** δ 162.9(d, *J* = 246.0 Hz, <sup>1</sup>*J*<sub>CF</sub>), 162.5(d, *J* = 244.0 Hz, <sup>1</sup>*J*<sub>CF</sub>), 154.5, 144.5, 144.4(d, *J* = 7.0 Hz, <sup>3</sup>*J*<sub>CF</sub>), 141.3(d, *J* = 7.0 Hz, <sup>3</sup>*J*<sub>CF</sub>), 138.1, 136.8,

134.1, 130.3, 130.1(d,  $J = 8.0$  Hz,  $^3J_{CF}$ ), 129.6, 129.2(d,  $J = 8.0$  Hz,  $^3J_{CF}$ ), 128.2, 126.3, 126.0, 125.4, 124.8(d,  $J = 3.0$  Hz,  $^4J_{CF}$ ), 122.5(d,  $J = 2.0$  Hz,  $^4J_{CF}$ ), 120.8, 119.0, 117.2(d,  $J = 22.0$  Hz,  $^2J_{CF}$ ), 115.9(d,  $J = 23.0$  Hz,  $^2J_{CF}$ ), 114.0(d,  $J = 22.0$  Hz,  $^2J_{CF}$ ), 113.1(d,  $J = 21.0$  Hz,  $^2J_{CF}$ ), 111.8, 44.8, 21.0;

$^{19}\text{F}$  NMR (376 MHz,  $\text{CDCl}_3$ )  $\delta$  -112.20, -113.59.

HRMS (ESI)  $m/z$  calcd for  $\text{C}_{29}\text{H}_{21}\text{F}_2\text{N}_2^+$  ( $\text{M}+\text{H}$ ) $^+$  435.1667, found 435.1668.

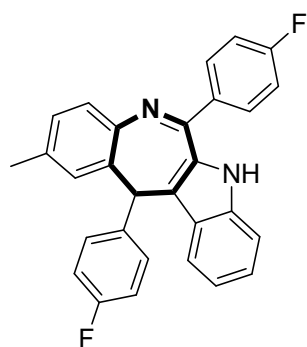

**6,12-bis(4-fluorophenyl)-10-methyl-5,12-dihydrobenzo[6,7]azepino[3,4-b]indole (4n)**

Yield 80%; 173.6 mg; yellow solid; column chromatography, silica gel (PE/EA, 12:1); mp 228-230 °C;

$^1\text{H}$  NMR (400 MHz,  $\text{CDCl}_3$ )  $\delta$  8.14 (s, 1H), 7.94 (d,  $J = 8.0$  Hz, 1H), 7.72 (dd,  $J = 8.8, 5.6$  Hz, 2H), 7.49 (d,  $J = 8.0$  Hz, 1H), 7.37–7.32 (m, 2H), 7.27 (dd,  $J = 10.4, 4.8$  Hz, 2H), 7.19 (d,  $J = 8.0$  Hz, 1H), 7.09 (t,  $J = 8.8$  Hz, 2H), 6.87 (dd,  $J = 8.0, 5.6$  Hz, 2H), 6.71 (t,  $J = 8.8$  Hz, 2H), 5.66 (s, 1H), 2.42 (s, 3H);

$^{13}\text{C}$  NMR (100 MHz,  $\text{CDCl}_3$ )  $\delta$  164.2(d,  $J = 249.0$  Hz,  $^1J_{CF}$ ), 161.2(d,  $J = 243.0$  Hz,  $^1J_{CF}$ ), 155.0, 143.2, 137.9, 137.4, 137.3, 136.9, 135.0, 134.6, 131.2(d,  $J = 9.0$  Hz,  $^3J_{CF}$ ), 130.2, 129.3, 128.4, 128.2(d,  $J = 8.0$  Hz,  $^3J_{CF}$ ), 126.9, 126.4, 126.1, 125.4, 120.8, 119.1, 115.7(d,  $J = 22.0$  Hz,  $^2J_{CF}$ ), 114.6(d,  $J = 22.0$  Hz,  $^2J_{CF}$ ), 111.8, 44.5, 21.0;

$^{19}\text{F}$  NMR (376 MHz,  $\text{CDCl}_3$ )  $\delta$  -110.07, -117.32.

HRMS (ESI)  $m/z$  calcd for  $\text{C}_{29}\text{H}_{21}\text{F}_2\text{N}_2^+$  ( $\text{M}+\text{H}$ ) $^+$  435.1667, found 435.1667.

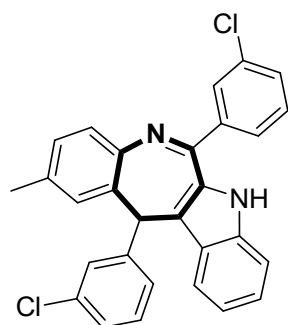

**6,12-bis(3-chlorophenyl)-10-methyl-5,12-dihydrobenzo[6,7]azepino[3,4-b]indole (4o)**



Yield 69%; 161.1 mg; yellow solid; column chromatography, silica gel (PE/EA, 12:1); mp 149-151 °C;

**<sup>1</sup>H NMR (400 MHz, CDCl<sub>3</sub>)** δ 8.13 (s, 1H), 7.93 (d, *J* = 8.0 Hz, 1H), 7.80 (s, 1H), 7.59 (d, *J* = 7.6 Hz, 1H), 7.50 (d, *J* = 8.0 Hz, 1H), 7.41 (dd, *J* = 22.4, 9.6 Hz, 4H), 7.29 (d, *J* = 11.2 Hz, 2H), 7.21 (d, *J* = 8.0 Hz, 1H), 6.98 (d, *J* = 4.8 Hz, 2H), 6.85 (d, *J* = 42.4 Hz, 2H), 5.67 (s, 1H), 2.44 (s, 3H);

**<sup>13</sup>C NMR (100 MHz, CDCl<sub>3</sub>)** δ 154.5, 143.8, 143.2, 140.8, 138.1, 136.9, 134.8, 134.2, 133.8, 130.4, 130.2, 129.8, 129.6, 129.1, 129.0, 128.2, 127.3, 127.1, 126.43, 126.36, 126.0, 125.9, 125.4, 125.2, 120.8, 119.1, 111.8, 44.8, 21.0;

HRMS (ESI) *m/z* calcd for C<sub>29</sub>H<sub>21</sub>Cl<sub>2</sub>N<sub>2</sub><sup>+</sup> (M+H)<sup>+</sup> 467.1076, found 467.1080.

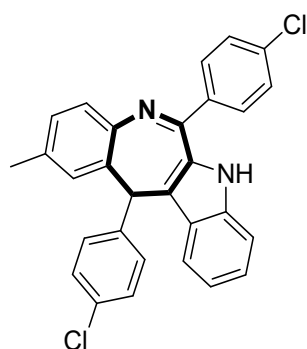

**6,12-bis(4-chlorophenyl)-10-methyl-5,12-dihydrobenzo[6,7]azepino[3,4-b]indole (4p)**

Yield 62%; 144.8 mg; yellow solid; column chromatography, silica gel (PE/EA, 12:1); mp 296-298 °C;

**<sup>1</sup>H NMR (400 MHz, DMSO-*d*<sub>6</sub>)** δ 11.44 (s, 1H), 8.04 (d, *J* = 8.0 Hz, 1H), 7.77 (d, *J* = 8.4 Hz, 2H), 7.56 (d, *J* = 8.4 Hz, 2H), 7.44 (d, *J* = 10.0 Hz, 2H), 7.37–7.28 (m, 2H), 7.21–7.10 (m, 4H), 6.83 (d, *J* = 8.4 Hz, 2H), 5.89 (s, 1H), 2.38 (s, 3H);

**<sup>13</sup>C NMR (100 MHz, DMSO-*d*<sub>6</sub>)** δ 154.9, 143.1, 141.3, 137.9, 137.4, 136.9, 135.2, 135.1, 130.8, 130.5, 130.2, 128.7, 128.6, 128.5, 127.8, 127.7, 126.3, 125.5, 124.8, 124.6, 119.9, 119.2, 112.5, 43.2, 20.6;

HRMS (ESI) *m/z* calcd for C<sub>29</sub>H<sub>21</sub>Cl<sub>2</sub>N<sub>2</sub><sup>+</sup> (M+H)<sup>+</sup> 467.1076, found 467.1078.

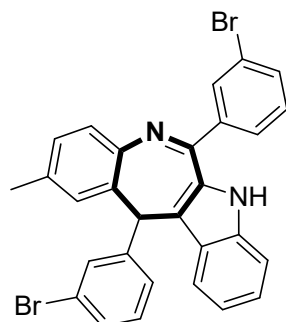

**6,12-bis(3-bromophenyl)-10-methyl-5,12-dihydrobenzo[6,7]azepino[3,4-b]indole (4q)**

Yield 57%; 158.5 mg; yellow solid; column chromatography, silica gel (PE/EA, 12:1); mp 137-139 °C;

**<sup>1</sup>H NMR (400 MHz, CDCl<sub>3</sub>)** δ 8.11 (s, 1H), 7.96 (t, *J* = 1.6 Hz, 1H), 7.92 (d, *J* = 8.0 Hz, 1H), 7.65–7.57 (m, 2H), 7.48 (d, *J* = 8.0 Hz, 1H), 7.37 (d, *J* = 4.0 Hz, 2H), 7.30–7.25 (m, 3H), 7.21 (d, *J* = 8.0 Hz, 1H), 7.13 (d, *J* = 8.0 Hz, 1H), 7.05 (s, 1H), 6.91 (t, *J* = 8.0 Hz, 1H), 6.84 (d, *J* = 8.0 Hz, 1H), 5.67 (s, 1H), 2.43 (s, 3H);

**<sup>13</sup>C NMR (100 MHz, CDCl<sub>3</sub>)** δ 154.4, 144.0, 143.1, 141.0, 138.1, 136.9, 134.3, 133.3, 131.9, 130.2, 130.1, 129.9, 129.5, 129.39, 129.36, 128.2, 127.7, 126.3, 125.9, 125.8, 125.7, 125.4, 123.0, 122.2, 120.8, 119.1, 111.8, 44.7, 21.0;

HRMS (ESI) *m/z* calcd for C<sub>29</sub>H<sub>21</sub>Br<sub>2</sub>N<sub>2</sub><sup>+</sup> (M+H)<sup>+</sup> 557.0045, found 557.0048.

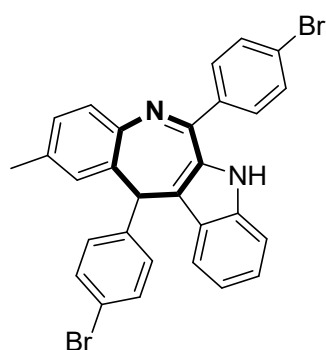

**6,12-bis(4-bromophenyl)-10-methyl-5,12-dihydrobenzo[6,7]azepino[3,4-b]indole (4r)**

Yield 51%; 141.8 mg; yellow solid; column chromatography, silica gel (PE/EA, 12:1); mp 320-322 °C;

**<sup>1</sup>H NMR (400 MHz, DMSO-*d*<sub>6</sub>)** δ 11.47 (s, 1H), 8.04 (d, *J* = 8.0 Hz, 1H), 7.71 (s, 4H), 7.47–7.43 (m, 2H), 7.36 (d, *J* = 8.0 Hz, 1H), 7.31 (t, *J* = 7.6 Hz, 1H), 7.25 (d, *J* = 8.4 Hz, 2H), 7.20 (dd, *J* = 7.6, 4.4 Hz, 2H), 6.77 (d, *J* = 8.4 Hz, 2H), 5.89 (s, 1H), 2.38 (s, 3H);

**<sup>13</sup>C NMR (100 MHz, DMSO-*d*<sub>6</sub>)** δ 155.3, 142.8, 141.7, 138.0, 137.6, 137.1, 135.3, 131.6, 131.2, 130.7, 130.2, 129.0, 128.6, 127.9, 126.2, 125.5, 125.1, 124.8, 124.2, 120.0, 119.3, 119.1, 112.6, 43.2, 20.7;

HRMS (ESI) *m/z* calcd for C<sub>29</sub>H<sub>21</sub>Br<sub>2</sub>N<sub>2</sub><sup>+</sup> (M+H)<sup>+</sup> 557.0045, found 557.0048.

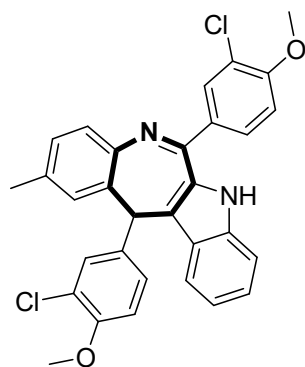

**6,12-bis(3-chloro-4-methoxyphenyl)-10-methyl-5,12-dihydrobenzo[6,7]azepino[3,4-b]indole (4s)**

Yield 70%; 184.5 mg; yellow solid; column chromatography, silica gel (PE/EA, 8:1);

mp 173-175 °C;

**<sup>1</sup>H NMR (400 MHz, CDCl<sub>3</sub>)** δ 8.44 (s, 1H), 7.94–7.85 (m, 2H), 7.58 (d, *J* = 8.4 Hz, 1H), 7.42 (d, *J* = 8.0 Hz, 1H), 7.31 (s, 2H), 7.24 (d, *J* = 7.6 Hz, 2H), 7.16 (d, *J* = 8.0 Hz, 1H), 6.92 (s, 1H), 6.83 (d, *J* = 8.4 Hz, 1H), 6.73 (d, *J* = 8.4 Hz, 1H), 6.54 (d, *J* = 8.8 Hz, 1H), 5.60 (s, 1H), 3.82 (s, 3H), 3.66 (s, 3H), 2.41 (s, 3H);

**<sup>13</sup>C NMR (100 MHz, CDCl<sub>3</sub>)** δ 156.3, 154.3, 153.0, 143.1, 137.5, 136.8, 134.80, 134.76, 132.3, 130.6, 130.0, 129.1, 128.8, 128.6, 128.0, 126.2, 126.1, 125.9, 125.1, 122.7, 121.6, 120.6, 118.9, 111.8, 111.5, 111.2, 56.1, 55.9, 44.0, 20.9;

HRMS (ESI) *m/z* calcd for C<sub>31</sub>H<sub>25</sub>Cl<sub>2</sub>N<sub>2</sub>O<sub>2</sub><sup>+</sup> (M+H)<sup>+</sup> 527.1287, found 527.1289.

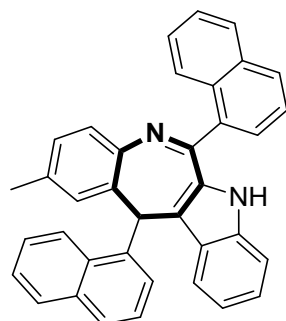

**10-methyl-6,12-di(naphthalen-1-yl)-5,12-dihydrobenzo[6,7]azepino[3,4-b]indole (4t)**

Yield 62%; 154.4 mg; yellow solid; column chromatography; silica gel (PE/EA, 12:1); mp 287-289 °C;

**<sup>1</sup>H NMR (400 MHz, CDCl<sub>3</sub>)** δ 8.62 (d, *J* = 8.4 Hz, 1H), 8.30 (d, *J* = 8.0 Hz, 1H), 7.89–7.81 (m, 2H), 7.71 (t, *J* = 8.0 Hz, 2H), 7.67–7.59 (m, 2H), 7.53 (s, 1H), 7.50–7.46 (m, 1H), 7.40 (t, *J* = 7.2 Hz, 2H), 7.36–7.31 (m, 2H), 7.27–7.18 (m, 3H), 7.13 (d, *J* = 6.0 Hz, 2H), 7.06 (d, *J* = 8.4 Hz, 1H), 6.48 (s, 3H), 2.44 (s, 3H);

**<sup>13</sup>C NMR (100 MHz, CDCl<sub>3</sub>)** δ 156.6, 144.6, 138.6, 136.8, 136.3, 134.6, 134.2, 134.1, 133.5, 131.3, 131.0, 130.1, 129.9, 129.7, 129.0, 128.8, 127.94, 127.89, 127.4, 127.3, 126.2, 125.89, 125.86, 125.7, 125.5, 125.22, 125.16, 125.1, 124.8, 124.7, 124.3, 120.6, 119.4, 111.9, 43.7, 21.1;

HRMS (ESI)  $m/z$  calcd for  $C_{37}H_{27}N_2^+$  ( $M+H$ ) $^+$  499.2168, found 499.2170.

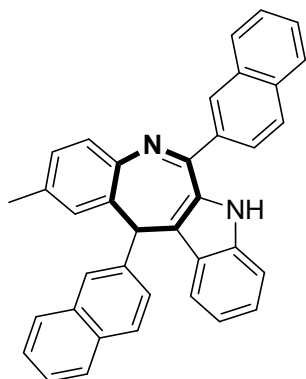

**10-methyl-6,12-di(naphthalen-2-yl)-5,12-dihydrobenzo[6,7]azepino[3,4-b]indole (4u)**

Yield 68%; 169.3 mg; yellow solid; column chromatography, silica gel (PE/EA, 12:1); mp 181-183 °C;

$^1H$  NMR (400 MHz,  $CDCl_3$ )  $\delta$  8.14 (d,  $J$  = 11.2 Hz, 2H), 8.00 (d,  $J$  = 8.0 Hz, 1H), 7.92 (d,  $J$  = 8.4 Hz, 1H), 7.80 (t,  $J$  = 7.2 Hz, 3H), 7.60–7.45 (m, 6H), 7.34 (d,  $J$  = 2.4 Hz, 2H), 7.29–7.18 (m, 7H), 5.88 (s, 1H), 2.44 (s, 3H);

$^{13}C$  NMR (100 MHz,  $CDCl_3$ )  $\delta$  155.9, 143.6, 138.8, 137.7, 136.8, 136.3, 134.7, 134.2, 132.9, 132.8, 132.0, 130.4, 129.6, 129.4, 128.7, 128.3, 128.0, 127.8, 127.7, 127.6, 127.2, 127.1, 127.0, 126.4, 126.2, 126.0, 125.8, 125.6, 125.2, 125.0, 120.6, 119.2, 111.7, 45.5, 21.0;

HRMS (ESI)  $m/z$  calcd for  $C_{37}H_{27}N_2^+$  ( $M+H$ ) $^+$  499.2168, found 499.2166.

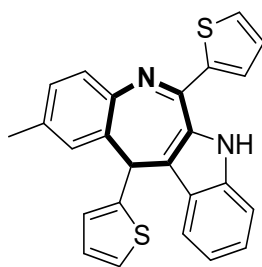

**10-methyl-6,12-di(thiophen-2-yl)-5,12-dihydrobenzo[6,7]azepino[3,4-b]indole (4v)**

Yield 72%; 147.6 mg; yellow solid; column chromatography, silica gel (PE/EA, 10:1); mp 168-170 °C;

$^1H$  NMR (400 MHz,  $CDCl_3$ )  $\delta$  8.36 (s, 1H), 7.87 (d,  $J$  = 8.0 Hz, 1H), 7.49 (dd,  $J$  = 16.0, 4.0 Hz, 2H), 7.40 (d,  $J$  = 8.0 Hz, 1H), 7.32 (d,  $J$  = 5.6 Hz, 2H), 7.24 (d,  $J$  = 11.2 Hz, 2H), 7.16–7.08 (m, 2H), 6.89 (d,  $J$  = 4.8 Hz, 1H), 6.68–6.62 (m, 1H), 6.48 (s, 1H), 5.81 (s, 1H), 2.39 (s, 3H);

$^{13}\text{C}$  NMR (100 MHz,  $\text{CDCl}_3$ )  $\delta$  149.5, 146.2, 145.2, 142.9, 137.6, 136.5, 134.8, 129.7, 129.40, 129.36, 128.2, 127.8, 126.4, 126.2, 125.3, 125.1, 124.8, 124.3, 123.7, 120.6, 119.0, 111.7, 41.7, 21.0;  
HRMS (ESI)  $m/z$  calcd for  $\text{C}_{25}\text{H}_{19}\text{N}_2\text{S}_2^+$  ( $\text{M}+\text{H}$ ) $^+$  411.0984, found 411.0986.

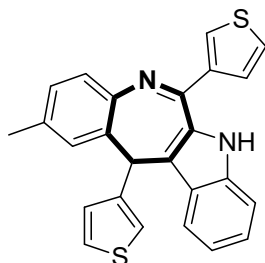

**10-methyl-6,12-di(thiophen-3-yl)-5,12-dihydrobenzo[6,7]azepino[3,4-b]indole (4w)**

Yield 73%; 149.7 mg; yellow solid; column chromatography, silica gel (PE/EA, 10:1); mp 152-154  $^{\circ}\text{C}$ ;

$^1\text{H}$  NMR (400 MHz,  $\text{CDCl}_3$ )  $\delta$  8.17 (s, 1H), 7.88 (d,  $J = 8.0$  Hz, 1H), 7.70 (s, 1H), 7.59 (d,  $J = 4.8$  Hz, 1H), 7.41 (d,  $J = 8.0$  Hz, 1H), 7.34–7.20 (m, 5H), 7.14 (d,  $J = 8.0$  Hz, 1H), 7.01–6.96 (m, 1H), 6.66 (d,  $J = 4.8$  Hz, 1H), 6.54 (s, 1H), 5.61 (s, 1H), 2.39 (s, 3H);

$^{13}\text{C}$  NMR (100 MHz,  $\text{CDCl}_3$ )  $\delta$  150.8, 143.3, 142.3, 142.2, 137.5, 136.5, 134.8, 129.63, 129.57, 128.1, 127.9, 127.6, 127.2, 126.9, 126.1, 125.5, 125.4, 125.1, 124.9, 120.5, 119.0, 111.6, 42.0, 21.0;

HRMS (ESI)  $m/z$  calcd for  $\text{C}_{25}\text{H}_{19}\text{N}_2\text{S}_2^+$  ( $\text{M}+\text{H}$ ) $^+$  411.0984, found 411.0990.

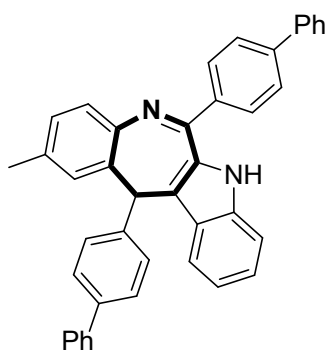

**6,12-di([1,1'-biphenyl]-4-yl)-10-methyl-5,12-dihydrobenzo[6,7]azepino[3,4-b]indole (4x)**

Yield 63%; 173.3 mg; yellow solid; column chromatography, silica gel (PE/EA, 12:1); mp 208-210  $^{\circ}\text{C}$ ;

$^1\text{H}$  NMR (400 MHz,  $\text{CDCl}_3$ )  $\delta$  8.14 (s, 1H), 7.94 (d,  $J = 7.6$  Hz, 1H), 7.81 (d,  $J = 8.0$  Hz, 2H), 7.58 (t,  $J = 7.6$  Hz, 4H), 7.51 (d,  $J = 8.0$  Hz, 1H), 7.45–7.33 (m, 5H), 7.33–7.14 (m, 10H), 7.03 (d,  $J = 6.8$  Hz, 2H), 5.74 (s, 1H);

$^{13}\text{C}$  NMR (100 MHz,  $\text{CDCl}_3$ )  $\delta$  155.7, 143.6, 143.0, 140.9, 140.3, 138.9, 137.9, 137.6, 136.8, 134.8, 130.3, 129.6, 129.5, 128.8, 128.5, 128.0, 127.7, 127.3, 127.2, 127.1, 126.9, 126.8, 126.6, 126.2, 125.0, 120.5, 119.1, 111.7, 44.9, 21.0;  
HRMS (ESI)  $m/z$  calcd for  $\text{C}_{41}\text{H}_{31}\text{N}_2^+$  ( $\text{M}+\text{H}$ ) $^+$  551.2481, found 551.2484.

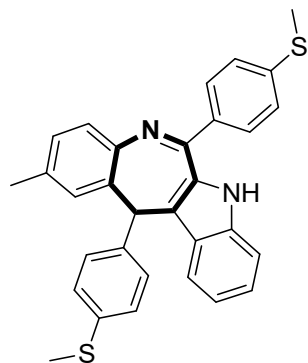

**10-methyl-6,12-bis(4-(methylthio)phenyl)-5,12-dihydrobenzo[6,7]azepino[3,4-b]indole (4y)**

Yield 69%; 169.1 mg; yellow solid; column chromatography, silica gel (PE/EA, 10:1); mp 142-144 °C;

$^1\text{H}$  NMR (400 MHz,  $\text{CDCl}_3$ )  $\delta$  8.13 (s, 1H), 7.92 (d,  $J$  = 8.0 Hz, 1H), 7.66 (d,  $J$  = 8.4 Hz, 2H), 7.46 (d,  $J$  = 8.0 Hz, 1H), 7.33–7.28 (m, 2H), 7.27–7.23 (m, 4H), 7.17 (d,  $J$  = 8.0 Hz, 1H), 6.89 (dd,  $J$  = 30.8, 8.4 Hz, 4H), 5.65 (s, 1H), 2.49 (s, 3H), 2.41 (s, 3H), 2.29 (s, 3H);

$^{13}\text{C}$  NMR (100 MHz,  $\text{CDCl}_3$ )  $\delta$  155.4, 143.5, 141.8, 138.9, 137.5, 136.7, 135.6, 135.5, 134.7, 130.3, 129.5, 129.4, 128.0, 127.4, 126.6, 126.5, 126.2, 126.1, 125.8, 125.0, 120.5, 119.1, 111.7, 44.7, 21.0, 16.0, 15.3;

HRMS (ESI)  $m/z$  calcd for  $\text{C}_{31}\text{H}_{27}\text{N}_2\text{S}_2^+$  ( $\text{M}+\text{H}$ ) $^+$  491.1610, found 491.1610.

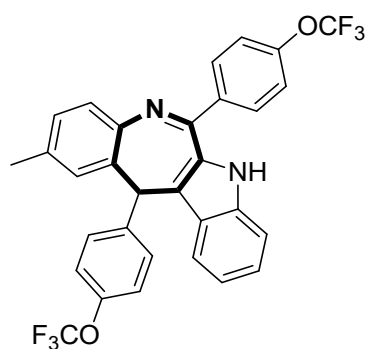

**10-methyl-6,12-bis(4-(trifluoromethoxy)phenyl)-5,12-dihydrobenzo[6,7]azepino[3,4-b]indole (4z)**

Yield 61%; 172.6 mg; yellow solid; column chromatography, silica gel (PE/EA, 8:1); mp 119-120 °C;

**<sup>1</sup>H NMR (400 MHz, CDCl<sub>3</sub>)** δ 8.07 (s, 1H), 7.94 (d, *J* = 8.0 Hz, 1H), 7.75 (d, *J* = 8.4 Hz, 2H), 7.50 (d, *J* = 8.0 Hz, 1H), 7.35 (s, 2H), 7.24 (dd, *J* = 18.4, 8.8 Hz, 5H), 6.91 (dd, *J* = 21.6, 8.8 Hz, 4H), 5.69 (s, 1H), 2.43 (s, 3H);

**<sup>13</sup>C NMR (100 MHz, CDCl<sub>3</sub>)** δ 154.6, 150.7, 147.5, 143.3, 140.4, 138.2, 137.5, 136.9, 134.1, 130.6, 130.3, 129.6, 128.3, 128.1, 126.5, 126.3, 126.0, 125.5, 120.93, 120.89, 120.4(q, *J* = 256.0 Hz, <sup>1</sup>*J*<sub>CF</sub>), 120.34, 120.32(q, *J* = 255.0 Hz, <sup>1</sup>*J*<sub>CF</sub>), 111.8, 44.6, 21.0;

**<sup>19</sup>F NMR (376 MHz, CDCl<sub>3</sub>)** δ -57.64, -57.97.

HRMS (ESI) *m/z* calcd for C<sub>31</sub>H<sub>21</sub>F<sub>6</sub>N<sub>2</sub>O<sub>2</sub><sup>+</sup> (M+H)<sup>+</sup> 567.1501, found 567.1508.

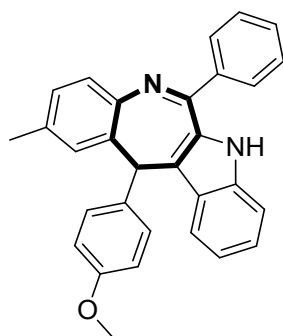

**12-(4-methoxyphenyl)-10-methyl-6-phenyl-5,12-dihydrobenzo[6,7]azepino[3,4-b]indole (4ah)**

Yield 29%; 62.2 mg; yellow solid; column chromatography, silica gel (PE/EA, 10:1);

mp 203-205 °C;

**<sup>1</sup>H NMR (400 MHz, CDCl<sub>3</sub>)** δ 8.12 (s, 1H), 7.94 (d, *J* = 8.0 Hz, 1H), 7.75–7.69 (m, 2H), 7.51 (d, *J* = 8.0 Hz, 1H), 7.41 (d, *J* = 6.4 Hz, 3H), 7.31 (s, 2H), 7.25 (d, *J* = 8.4 Hz, 2H), 7.18 (d, *J* = 8.0 Hz, 1H), 6.85 (d, *J* = 8.4 Hz, 2H), 6.57 (d, *J* = 8.8 Hz, 2H), 5.67 (s, 1H), 3.60 (s, 3H), 2.41 (s, 3H).

**<sup>13</sup>C NMR (100 MHz, CDCl<sub>3</sub>)** δ 157.7, 156.1, 143.4, 139.1, 137.6, 136.8, 135.1, 133.9, 130.2, 129.5, 129.2, 128.6, 127.9, 127.8, 126.8, 126.7, 126.2, 125.0, 120.5, 119.1, 113.2, 111.7, 55.1, 44.5, 21.0.

HRMS (ESI) *m/z* calcd for C<sub>30</sub>H<sub>25</sub>N<sub>2</sub>O<sup>+</sup> (M+H)<sup>+</sup> 429.1961, found 429.1963.

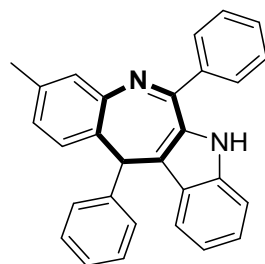

**9-methyl-6,12-diphenyl-5,12-dihydrobenzo[6,7]azepino[3,4-b]indole (5a)**

Yield 61%; 121.4 mg; yellow solid; column chromatography, silica gel (PE/EA,

12:1); mp 146-148 °C;

**<sup>1</sup>H NMR (400 MHz, CDCl<sub>3</sub>)** δ 8.03 (s, 1H), 7.93 (d, *J* = 8.0 Hz, 1H), 7.72 (d, *J* = 7.2 Hz, 2H), 7.42 (t, *J* = 6.0 Hz, 4H), 7.37–7.28 (m, 3H), 7.24 (d, *J* = 8.8 Hz, 1H), 7.15 (d, *J* = 7.6 Hz, 1H), 7.06–6.92 (m, 5H), 5.74 (s, 1H), 2.40 (s, 3H).

**<sup>13</sup>C NMR (100 MHz, CDCl<sub>3</sub>)** δ 156.6, 145.7, 141.8, 139.2, 136.8, 132.4, 130.3, 129.8, 129.7, 129.2, 128.5, 128.3, 127.8, 126.9, 126.7, 126.2, 126.0, 125.0, 120.5, 119.2, 111.6, 44.8, 20.9.

HRMS (ESI) *m/z* calcd for C<sub>29</sub>H<sub>23</sub>N<sub>2</sub><sup>+</sup> (M+H)<sup>+</sup> 399.1855, found 399.1858.

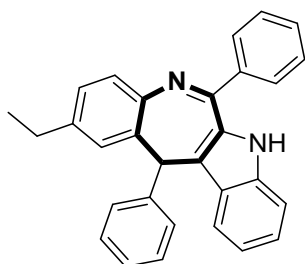

**10-ethyl-6,12-diphenyl-5,12-dihydrobenzo[6,7]azepino[3,4-b]indole (5b)**

Yield 75%; 154.5 mg; white solid; column chromatography, silica gel (PE/EA, 12:1);

mp 131-133 °C;

**<sup>1</sup>H NMR (600 MHz, CDCl<sub>3</sub>)** δ 8.11 (s, 1H), 7.97 (d, *J* = 7.8 Hz, 1H), 7.72 (d, *J* = 6.0 Hz, 2H), 7.56 (s, 1H), 7.42 (d, *J* = 7.2 Hz, 3H), 7.35–7.22 (m, 4H), 7.10–6.94 (m, 4H), 5.75 (s, 1H), 2.73 (d, *J* = 7.2 Hz, 2H), 1.29 (t, *J* = 7.2 Hz, 3H).

**<sup>13</sup>C NMR (150 MHz, CDCl<sub>3</sub>)** δ 156.1, 143.9, 143.6, 141.8, 139.1, 136.8, 134.7, 130.2, 129.5, 129.2, 128.5, 127.8, 126.84, 126.78, 126.6, 126.2, 126.0, 125.0, 120.5, 119.2, 111.7, 45.3, 28.4, 15.6.

HRMS (ESI) *m/z* calcd for C<sub>30</sub>H<sub>25</sub>N<sub>2</sub><sup>+</sup> (M+H)<sup>+</sup> 413.2012, found 413.2014.

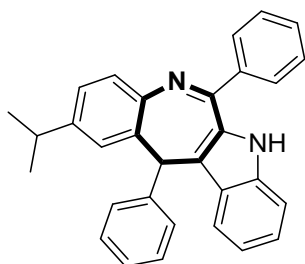

**10-isopropyl-6,12-diphenyl-5,12-dihydrobenzo[6,7]azepino[3,4-b]indole (5c)**

Yield 72%; 153.4 mg; yellow solid; column chromatography, silica gel (PE/EA,

12:1); mp 105-107 °C;

**<sup>1</sup>H NMR (600 MHz, CDCl<sub>3</sub>)** δ 8.14 (s, 1H), 7.97 (d, *J* = 7.8 Hz, 1H), 7.72 (d, *J* = 7.2 Hz, 2H), 7.56 (d, *J* = 7.8 Hz, 1H), 7.42 (t, *J* = 7.2 Hz, 3H), 7.30 (m, *J* = 33.0, 14.4, 7.8 Hz, 4H), 7.00 (m, *J* = 37.8, 22.8, 7.2 Hz, 4H), 5.75 (s, 1H), 1.42–1.25 (m, 6H), 1.20 (d, *J* = 7.2 Hz, 1H).



$^{13}\text{C}$  NMR (150 MHz,  $\text{CDCl}_3$ )  $\delta$  156.0, 148.5, 143.7, 141.8, 139.2, 136.8, 134.6, 130.2, 129.6, 129.2, 128.5, 127.8, 127.1, 126.8, 126.5, 126.3, 126.0, 125.1, 125.0, 120.4, 119.2, 115.2, 111.7, 45.4, 33.7, 24.1.

HRMS (ESI)  $m/z$  calcd for  $\text{C}_{31}\text{H}_{27}\text{N}_2^+$  ( $\text{M}+\text{H}$ ) $^+$  427.2168, found 427.2170.

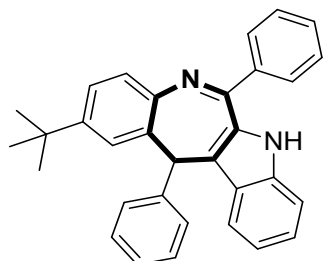

**10-(tert-butyl)-6,12-diphenyl-5,12-dihydrobenzo[6,7]azepino[3,4-b]indole (5d)**

Yield 62%; 136.4 mg; yellow solid; column chromatography, silica gel (PE/EA, 12:1); mp 125-127  $^{\circ}\text{C}$ ;

$^1\text{H}$  NMR (600 MHz,  $\text{CDCl}_3$ )  $\delta$  8.15 (s, 1H), 7.99 (d,  $J=7.8$  Hz, 1H), 7.72 (d,  $J=6.6$  Hz, 2H), 7.59 (s, 1H), 7.52–7.24 (m, 9H), 7.07–6.91 (m, 4H), 5.77 (s, 1H), 1.38 (s, 9H).

$^{13}\text{C}$  NMR (150 MHz,  $\text{CDCl}_3$ )  $\delta$  156.2, 151.0, 143.6, 143.2, 141.8, 139.0, 136.9, 134.2, 130.9, 130.3, 129.2, 128.5, 127.8, 126.8, 126.6, 126.3, 126.0, 125.1, 124.3, 120.5, 119.3, 114.9, 111.7, 45.6, 34.6, 31.4.

HRMS (ESI)  $m/z$  calcd for  $\text{C}_{32}\text{H}_{29}\text{N}_2^+$  ( $\text{M}+\text{H}$ ) $^+$  441.2325, found 441.2328.

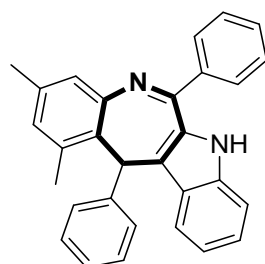

**9,11-dimethyl-6,12-diphenyl-5,12-dihydrobenzo[6,7]azepino[3,4-b]indole (5e)**

Yield 58 %; 119.5 mg; yellow solid; column chromatography, silica gel (PE/EA, 12:1); mp 119-121  $^{\circ}\text{C}$ ;

$^1\text{H}$  NMR (600 MHz,  $\text{CDCl}_3$ )  $\delta$  8.04 (s, 1H), 7.92 (d,  $J=7.8$  Hz, 1H), 7.71 (d,  $J=6.6$  Hz, 2H), 7.40 (d,  $J=7.2$  Hz, 3H), 7.36–7.18 (m, 4H), 6.98 (m,  $J=48.6$ , 36.6, 16.2 Hz, 6H), 6.18 (s, 1H), 2.64 (s, 3H), 2.35 (s, 3H);

$^{13}\text{C}$  NMR (150 MHz,  $\text{CDCl}_3$ )  $\delta$  156.0, 146.2, 141.4, 138.9, 136.7, 135.8, 135.0, 132.1, 130.2, 130.1, 129.1, 128.5, 127.7, 127.5, 127.1, 126.7, 126.4, 125.9, 124.9, 120.5, 119.1, 111.7, 38.0, 20.8, 20.6;

HRMS (ESI)  $m/z$  calcd for  $\text{C}_{30}\text{H}_{25}\text{N}_2^+$  ( $\text{M}+\text{H}$ ) $^+$  413.2012, found 413.2013.

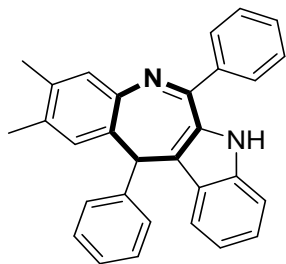

**9,10-dimethyl-6,12-diphenyl-5,12-dihydrobenzo[6,7]azepino[3,4-b]indole (5f)**

Yield 67%; 138.0 mg; yellow solid; column chromatography, silica gel (PE/EA, 12:1); mp 282-284 °C;

<sup>1</sup>H NMR (400 MHz, CDCl<sub>3</sub>) δ 8.00 (s, 1H), 7.93 (d, *J* = 8.0 Hz, 1H), 7.74–7.69 (m, 2H), 7.40 (d, *J* = 4.8 Hz, 4H), 7.31–7.21 (m, 4H), 7.04–6.94 (m, 5H), 5.70 (s, 1H), 2.31 (d, *J* = 7.2 Hz, 6H).

<sup>13</sup>C NMR (100 MHz, CDCl<sub>3</sub>) δ 156.0, 143.7, 142.0, 139.3, 136.7, 136.3, 135.3, 132.4, 130.9, 130.5, 130.1, 129.1, 128.5, 127.8, 126.84, 126.75, 126.5, 126.2, 125.9, 124.9, 120.4, 119.1, 111.6, 44.7, 19.27, 19.25.

HRMS (ESI) *m/z* calcd for C<sub>30</sub>H<sub>25</sub>N<sub>2</sub><sup>+</sup> (M+H)<sup>+</sup> 413.2012, found 413.2014.

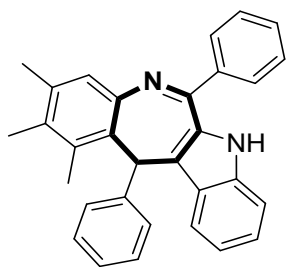

**9,10,11-trimethyl-6,12-diphenyl-5,12-dihydrobenzo[6,7]azepino[3,4-b]indole (5g)**

Yield 52%; 111.8 mg; white solid; column chromatography, silica gel (PE/EA, 12:1); mp 267-269 °C;

<sup>1</sup>H NMR (400 MHz, CDCl<sub>3</sub>) δ 8.04 (s, 1H), 7.95 (d, *J* = 8.0 Hz, 1H), 7.72 (d, *J* = 8.0 Hz, 2H), 7.41 (d, *J* = 6.4 Hz, 3H), 7.33 (d, *J* = 4.8 Hz, 2H), 7.29 (s, 1H), 7.08–6.88 (m, 6H), 6.32 (s, 1H), 2.61 (s, 3H), 2.34 (s, 3H), 2.30 (s, 3H).

<sup>13</sup>C NMR (100 MHz, CDCl<sub>3</sub>) δ 155.3, 143.9, 141.7, 139.0, 136.7, 134.8, 134.5, 133.3, 132.7, 130.1, 129.1, 128.5, 127.9, 127.7, 127.3, 126.8, 126.6, 125.9, 124.8, 120.4, 119.1, 111.7, 38.7, 20.9, 16.7, 16.4.

HRMS (ESI) *m/z* calcd for C<sub>31</sub>H<sub>27</sub>N<sub>2</sub><sup>+</sup> (M+H)<sup>+</sup> 427.2168, found 427.2171.

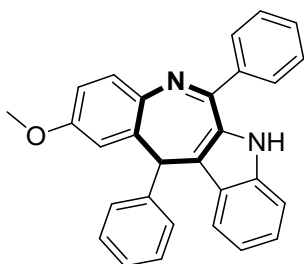

**10-methoxy-6,12-diphenyl-5,12-dihydrobenzo[6,7]azepino[3,4-b]indole (5h)**

Yield 73%; 151.1 mg; yellow solid; column chromatography, silica gel (PE/EA, 8:1);

mp 269-271 °C;

<sup>1</sup>H NMR (400 MHz, CDCl<sub>3</sub>) δ 8.07 (s, 1H), 7.94 (d, *J* = 8.0 Hz, 1H), 7.71 (d, *J* = 5.6 Hz, 2H), 7.56 (d, *J* = 8.4 Hz, 1H), 7.39 (d, *J* = 6.0 Hz, 3H), 7.27 (dd, *J* = 19.2, 9.2 Hz, 3H), 6.97 (m, *J* = 16.8, 12.8, 4.8 Hz, 7H), 5.70 (s, 1H), 3.86 (s, 3H).

<sup>13</sup>C NMR (100 MHz, CDCl<sub>3</sub>) δ 159.4, 154.9, 141.6, 139.7, 139.2, 136.7, 135.9, 131.3, 130.0, 129.0, 128.5, 127.8, 126.9, 126.8, 126.2, 126.1, 125.5, 124.9, 120.5, 119.0, 114.5, 112.7, 111.6, 55.5, 45.4.

HRMS (ESI) *m/z* calcd for C<sub>29</sub>H<sub>23</sub>N<sub>2</sub>O<sup>+</sup> (M+H)<sup>+</sup> 415.1804, found 415.1805.

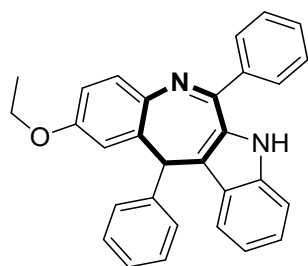

**10-ethoxy-6,12-diphenyl-5,12-dihydrobenzo[6,7]azepino[3,4-b]indole (5i)**

Yield 71%; 151.9 mg; yellow solid; column chromatography, silica gel (PE/EA, 8:1);

mp 207-209 °C;

<sup>1</sup>H NMR (400 MHz, CDCl<sub>3</sub>) δ 8.09 (s, 1H), 7.93 (d, *J* = 8.0 Hz, 1H), 7.74–7.70 (m, 2H), 7.57 (d, *J* = 8.4 Hz, 1H), 7.41 (d, *J* = 6.4 Hz, 3H), 7.32 (s, 2H), 7.25 (d, *J* = 7.2 Hz, 1H), 7.05–6.92 (m, 7H), 5.70 (s, 1H), 4.10 (q, *J* = 7.2 Hz, 2H), 1.44 (t, *J* = 7.2 Hz, 3H).

<sup>13</sup>C NMR (100 MHz, CDCl<sub>3</sub>) δ 158.9, 154.8, 141.6, 139.3, 136.7, 135.9, 131.3, 130.1, 129.1, 128.5, 127.8, 126.9, 126.8, 126.3, 126.1, 125.0, 120.5, 119.0, 115.2, 113.1, 111.6, 63.7, 45.4, 14.9.

HRMS (ESI) *m/z* calcd for C<sub>30</sub>H<sub>25</sub>N<sub>2</sub>O<sup>+</sup> (M+H)<sup>+</sup> 429.1961, found 429.1963.

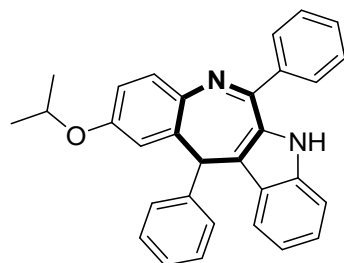

**10-isopropoxy-6,12-diphenyl-5,12-dihydrobenzo[6,7]azepino[3,4-b]indole (5j)**

Yield 66%; 145.9 mg; yellow solid; column chromatography; silica gel (PE/EA, 8:1);

mp 132-134 °C;

**<sup>1</sup>H NMR (400 MHz, CDCl<sub>3</sub>)** δ 8.11 (s, 1H), 7.93 (d, *J* = 8.0 Hz, 1H), 7.72 (d, *J* = 5.2 Hz, 2H), 7.59 (s, 1H), 7.41 (d, *J* = 5.6 Hz, 3H), 7.34 (d, *J* = 3.6 Hz, 2H), 7.25 (d, *J* = 6.0 Hz, 1H), 7.07–6.91 (m, 7H), 5.69 (s, 1H), 4.63 (m, *J* = 12.0, 6.0 Hz, 1H), 1.37 (dd, *J* = 8.4, 6.4 Hz, 6H);

**<sup>13</sup>C NMR (100 MHz, CDCl<sub>3</sub>)** δ 157.9, 141.7, 136.1, 131.2, 130.1, 129.35, 129.29, 129.1, 128.7, 128.5, 128.2, 127.8, 127.0, 126.8, 126.3, 126.1, 125.0, 120.5, 119.1, 116.7, 114.0, 111.6, 70.1, 45.4, 22.2, 22.1.

HRMS (ESI) *m/z* calcd for C<sub>31</sub>H<sub>27</sub>N<sub>2</sub>O<sup>+</sup> (M+H)<sup>+</sup> 443.2117, found 443.2121.

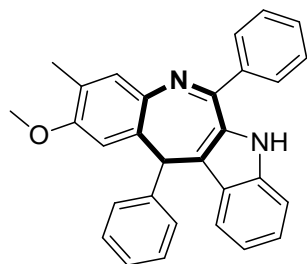

**10-methoxy-9-methyl-6,12-diphenyl-5,12-dihydrobenzo[6,7]azepino[3,4-b]indole (5k)**

Yield 75%; 160.5 mg; yellow solid; column chromatography, silica gel (PE/EA, 8:1);

mp 285-287 °C;

**<sup>1</sup>H NMR (400 MHz, CDCl<sub>3</sub>)** δ 10.85 (s, 1H), 7.90 (d, *J* = 8.0 Hz, 1H), 7.79 (dd, *J* = 6.4, 2.8 Hz, 2H), 7.43 (dd, *J* = 9.6, 6.4 Hz, 4H), 7.32 (s, 1H), 7.26 (t, *J* = 7.2 Hz, 1H), 7.18 (d, *J* = 7.2 Hz, 1H), 7.05–7.00 (m, 2H), 6.95 (d, *J* = 8.8 Hz, 4H), 5.70 (s, 1H), 3.92 (s, 3H), 2.24 (s, 3H);

**<sup>13</sup>C NMR (100 MHz, CDCl<sub>3</sub>)** δ 156.1, 154.0, 141.2, 138.7, 137.7, 136.4, 132.4, 130.4, 128.6, 128.1, 127.1, 126.5, 125.8, 125.7, 124.73, 124.65, 123.6, 123.3, 123.0, 118.6, 117.4, 111.4, 109.5, 54.5, 43.8, 14.7;

HRMS (ESI) *m/z* calcd for C<sub>30</sub>H<sub>25</sub>N<sub>2</sub>O<sup>+</sup> (M+H)<sup>+</sup> 429.1961, found 429.1964.

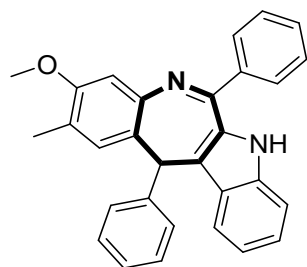

**9-methoxy-10-methyl-6,12-diphenyl-5,12-dihydrobenzo[6,7]azepino[3,4-b]indole (5l)**

Yield 76%; 162.6 mg; yellow solid; column chromatography, silica gel (PE/EA, 12:1);

mp 300-302 °C;

**<sup>1</sup>H NMR (400 MHz, CDCl<sub>3</sub>)** δ 7.99 (s, 1H), 7.93 (d, *J* = 8.0 Hz, 1H), 7.73–7.69 (m, 2H), 7.42–7.37 (m, 3H), 7.29–7.20 (m, 4H), 7.09 (s, 1H), 7.04–6.99 (m, 2H), 6.95 (d, *J* = 7.6 Hz, 3H), 5.68 (s, 1H), 3.87 (s, 3H), 2.28 (s, 3H);

**<sup>13</sup>C NMR (100 MHz, CDCl<sub>3</sub>)** δ 156.5, 156.2, 144.7, 142.2, 139.3, 136.7, 131.7, 130.1, 129.1, 128.5, 127.7, 127.0, 126.9, 126.8, 126.7, 126.3, 126.1, 125.9, 125.0, 120.4, 119.2, 111.6, 110.8, 55.5, 44.3, 15.9;

HRMS (ESI) *m/z* calcd for C<sub>30</sub>H<sub>25</sub>N<sub>2</sub>O<sup>+</sup> (M+H)<sup>+</sup> 429.1961, found 429.1963.

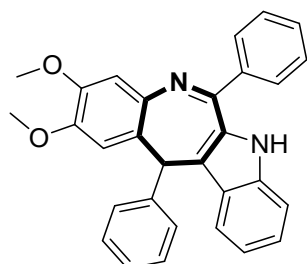

**9,10-dimethoxy-6,12-diphenyl-5,12-dihydrobenzo[6,7]azepino[3,4-b]indole (5m)**

Yield 73%; 162.1 mg; yellow solid; column chromatography, silica gel (PE/EA, 5:1);

mp 280-282 °C;

**<sup>1</sup>H NMR (400 MHz, CDCl<sub>3</sub>)** δ 8.10 (s, 1H), 7.98 (d, *J* = 8.0 Hz, 1H), 7.72 (d, *J* = 4.4 Hz, 2H), 7.41 (d, *J* = 4.8 Hz, 3H), 7.35 (d, *J* = 3.6 Hz, 2H), 7.27 (dd, *J* = 8.0, 4.0 Hz, 1H), 7.19 (s, 1H), 7.06–6.94 (m, 6H), 5.70 (s, 1H), 3.96 (d, *J* = 6.0 Hz, 6H);

**<sup>13</sup>C NMR (100 MHz, CDCl<sub>3</sub>)** δ 155.4, 148.8, 147.6, 142.0, 139.6, 139.3, 136.8, 130.1, 129.0, 128.6, 127.9, 126.9, 126.83, 126.78, 126.2, 126.1, 125.1, 120.5, 119.1, 112.8, 112.1, 111.7, 56.1, 56.0, 44.9;

HRMS (ESI) *m/z* calcd for C<sub>30</sub>H<sub>25</sub>N<sub>2</sub>O<sub>2</sub><sup>+</sup> (M+H)<sup>+</sup> 445.1910, found 445.1910.

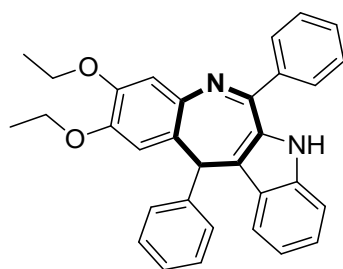

**9,10-diethoxy-6,12-diphenyl-5,12-dihydrobenzo[6,7]azepino[3,4-b]indole (5n)**

Yield 73%; 172.3 mg; yellow solid; column chromatography, silica gel (PE/EA, 5:1);

mp 263-265 °C;

**<sup>1</sup>H NMR (400 MHz, CDCl<sub>3</sub>)** δ 8.17 (s, 1H), 7.94 (d, *J* = 7.6 Hz, 1H), 7.67 (d, *J* = 3.6 Hz, 2H), 7.33 (d, *J* = 4.4 Hz, 3H), 7.27–7.16 (m, 4H), 7.01 (d, *J* = 7.2 Hz, 2H), 6.97–6.91 (m, 4H), 5.65 (s, 1H), 4.12 (dd, *J* = 9.6, 4.8 Hz, 4H), 1.45–1.40 (m, 6H);

$^{13}\text{C}$  NMR (100 MHz,  $\text{CDCl}_3$ )  $\delta$  155.2, 148.3, 147.2, 142.1, 139.4, 139.2, 136.7, 129.9, 128.9, 128.4, 127.7, 127.0, 126.8, 126.7, 126.0, 125.9, 124.8, 120.3, 118.9, 114.5, 114.0, 111.7, 64.6, 64.4, 44.7, 14.8, 14.7;  
HRMS (ESI)  $m/z$  calcd for  $\text{C}_{32}\text{H}_{29}\text{N}_2\text{O}_2^+$  ( $\text{M}+\text{H}$ ) $^+$  473.2223, found 473.2222.

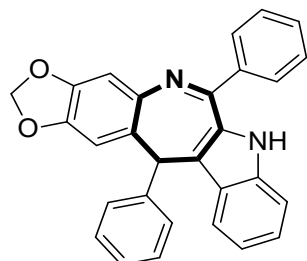

**6,12-diphenyl-7,12-dihydro-[1,3]dioxolo[4'',5'':4',5']benzo[1',2':6,7]azepino[3,4-b]indole (5o)**

Yield 72%; 154.1 mg; yellow solid; column chromatography, silica gel (PE/EA, 5:1);

mp 191-193  $^{\circ}\text{C}$ ;

$^1\text{H}$  NMR (400 MHz,  $\text{CDCl}_3$ )  $\delta$  8.05 (s, 1H), 7.92 (d,  $J = 8.0$  Hz, 1H), 7.69 (d,  $J = 6.4$  Hz, 2H), 7.40 (d,  $J = 6.4$  Hz, 3H), 7.35–7.29 (m, 2H), 7.24 (d,  $J = 4.4$  Hz, 1H), 7.01 (ddd,  $J = 24.4, 18.4, 10.8$  Hz, 7H), 6.04 (s, 1H), 5.95 (s, 1H), 5.64 (s, 1H);

$^{13}\text{C}$  NMR (100 MHz,  $\text{CDCl}_3$ )  $\delta$  155.3, 147.6, 146.7, 141.6, 140.7, 139.1, 136.8, 130.2, 129.1, 128.5, 128.4, 127.8, 126.84, 126.75, 126.09, 126.06, 125.1, 120.5, 119.1, 111.7, 109.5, 109.0, 101.6, 44.9;

HRMS (ESI)  $m/z$  calcd for  $\text{C}_{29}\text{H}_{21}\text{N}_2\text{O}_2^+$  ( $\text{M}+\text{H}$ ) $^+$  429.1597, found 429.1599.

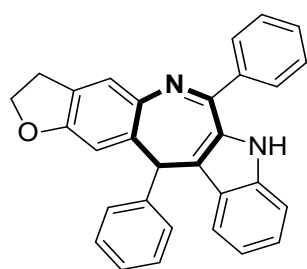

**6,12-diphenyl-2,3,7,12-tetrahydrobenzofuro[6',5':6,7]azepino[3,4-b]indole (5p)**

Yield 73%; 155.5 mg; yellow solid; column chromatography, silica gel (PE/EA, 8:1);

mp 184-186  $^{\circ}\text{C}$ ;

$^1\text{H}$  NMR (400 MHz,  $\text{CDCl}_3$ )  $\delta$  10.83 (s, 1H), 7.80 (dd,  $J = 64.4, 25.2$  Hz, 3H), 7.54–7.11 (m, 7H), 7.07–6.79 (m, 6H), 5.68 (s, 1H), 4.71–4.48 (m, 2H), 3.26 (dd,  $J = 37.6, 7.6$  Hz, 2H);

$^{13}\text{C}$  NMR (100 MHz,  $\text{CDCl}_3$ )  $\delta$  159.1, 154.1, 140.8, 137.6, 137.3, 136.9, 134.4, 129.0, 128.2, 127.2, 126.5, 125.6, 125.5, 125.1, 124.8, 124.5, 124.3, 123.9, 123.5, 118.8, 117.5, 111.5, 108.3, 70.8, 28.0;

HRMS (ESI)  $m/z$  calcd for  $\text{C}_{30}\text{H}_{23}\text{N}_2\text{O}^+$  ( $\text{M}+\text{H}$ ) $^+$  427.1804, found 427.1806.

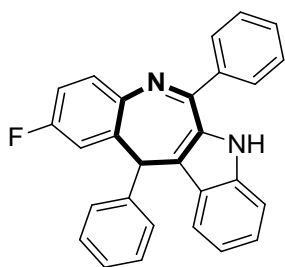

**10-fluoro-6,12-diphenyl-5,12-dihydrobenzo[6,7]azepino[3,4-b]indole (5q)**

Yield 66%; 132.7 mg; yellow solid; column chromatography, silica gel (PE/EA, 12:1);

mp 291-293 °C;

<sup>1</sup>H NMR (400 MHz, CDCl<sub>3</sub>) δ 8.13 (s, 1H), 7.94 (d, *J* = 8.0 Hz, 1H), 7.72 (d, *J* = 6.4 Hz, 2H), 7.58 (dd, *J* = 8.4, 6.0 Hz, 1H), 7.49–7.41 (m, 3H), 7.36 (d, *J* = 3.6 Hz, 2H), 7.28 (dd, *J* = 8.4, 4.0 Hz, 1H), 7.20 (dd, *J* = 8.8, 2.8 Hz, 1H), 7.06 (m, *J* = 21.6, 11.2, 4.8 Hz, 4H), 6.94 (d, *J* = 7.6 Hz, 2H), 5.71 (s, 1H).

<sup>13</sup>C NMR (100 MHz, CDCl<sub>3</sub>) δ 162.2(d, *J* = 246.0 Hz, <sup>1</sup>*J*<sub>CF</sub>), 156.3, 142.3, 140.9, 138.9, 136.8, 136.5(d, *J* = 7.0 Hz, <sup>3</sup>*J*<sub>CF</sub>), 131.2(d, *J* = 9.0 Hz, <sup>3</sup>*J*<sub>CF</sub>), 130.4, 129.1, 128.6, 127.9, 126.8, 126.6, 126.3, 126.1, 125.7, 125.3, 120.7, 119.1, 116.0(d, *J* = 22.0 Hz, <sup>2</sup>*J*<sub>CF</sub>), 114.0(d, *J* = 22.0 Hz, <sup>2</sup>*J*<sub>CF</sub>), 111.7, 45.0;

<sup>19</sup>F NMR (376 MHz, CDCl<sub>3</sub>) δ -116.29.

HRMS (ESI) *m/z* calcd for C<sub>28</sub>H<sub>20</sub>FN<sub>2</sub><sup>+</sup> (M+H)<sup>+</sup> 403.1605, found 403.1604.

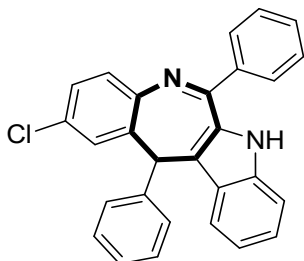

**10-chloro-6,12-diphenyl-5,12-dihydrobenzo[6,7]azepino[3,4-b]indole (5r)**

Yield 59%; 123.6 mg; white solid; column chromatography, silica gel (PE/EA, 12:1);

mp 166-168 °C;

<sup>1</sup>H NMR (600 MHz, CDCl<sub>3</sub>) δ 8.16 (s, 1H), 7.94 (d, *J* = 7.2 Hz, 1H), 7.72 (d, *J* = 5.4 Hz, 2H), 7.49 (dd, *J* = 46.2, 19.2 Hz, 6H), 7.35 (s, 3H), 7.05 (t, *J* = 20.4 Hz, 3H), 6.94 (s, 2H), 5.71 (s, 1H);

<sup>13</sup>C NMR (150 MHz, CDCl<sub>3</sub>) δ 157.0, 144.5, 140.8, 138.8, 136.8, 136.3, 132.8, 130.7, 130.5, 129.7, 129.3, 129.2, 128.6, 127.9, 127.1, 126.8, 126.3, 126.1, 125.8, 125.3, 120.8, 119.1, 111.8, 44.9;

HRMS (ESI) *m/z* calcd for C<sub>28</sub>H<sub>20</sub>ClN<sub>2</sub><sup>+</sup> (M+H)<sup>+</sup> 419.1309, found 419.1312.

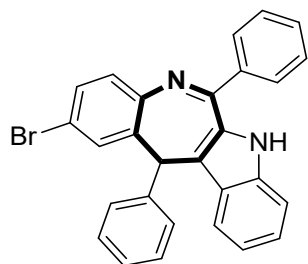

**10-bromo-6,12-diphenyl-5,12-dihydrobenzo[6,7]azepino[3,4-b]indole (5s)**

Yield 49%; 113.4 mg; yellow solid; column chromatography, silica gel (PE/EA, 12:1);

mp 124-126 °C;

**<sup>1</sup>H NMR (600 MHz, CDCl<sub>3</sub>)** δ 8.17 (s, 1H), 7.95 (d, *J* = 7.8 Hz, 1H), 7.72 (d, *J* = 6.6 Hz, 2H), 7.63 (s, 1H), 7.45 (dd, *J* = 19.8, 9.6 Hz, 5H), 7.37 (s, 2H), 7.28 (s, 1H), 7.03 (dd, *J* = 22.2, 6.6 Hz, 3H), 6.94 (d, *J* = 6.6 Hz, 2H), 5.72 (s, 1H).

**<sup>13</sup>C NMR (150 MHz, CDCl<sub>3</sub>)** δ 157.2, 144.9, 140.8, 138.8, 136.8, 136.7, 132.2, 130.9, 130.6, 130.1, 129.2, 128.6, 127.9, 126.8, 126.6, 126.3, 126.2, 126.0, 125.4, 120.9, 120.8, 119.2, 111.8, 44.8.

HRMS (ESI) *m/z* calcd for C<sub>28</sub>H<sub>20</sub>BrN<sub>2</sub><sup>+</sup> (M+H)<sup>+</sup> 463.0804, found 463.0807.

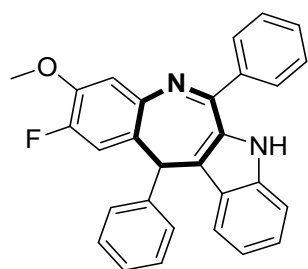

**10-fluoro-9-methoxy-6,12-diphenyl-5,12-dihydrobenzo[6,7]azepino[3,4-b]indole (5t)**

Yield 72%; 155.5 mg; yellow solid; column chromatography, silica gel (PE/EA, 8:1); mp 259-261 °C;

**<sup>1</sup>H NMR (400 MHz, CDCl<sub>3</sub>)** δ 8.03 (s, 1H), 7.89 (d, *J* = 8.0 Hz, 1H), 7.70–7.65 (m, 2H), 7.37 (d, *J* = 6.4 Hz, 3H), 7.21 (m, *J* = 29.6, 16.8, 10.4 Hz, 5H), 7.03–6.91 (m, 5H), 5.61 (s, 1H), 3.88 (s, 3H);

**<sup>13</sup>C NMR (100 MHz, CDCl<sub>3</sub>)** δ 156.6, 151.5(d, *J* = 246.0 Hz, <sup>1</sup>*J*<sub>CF</sub>), 146.0(d, *J* = 21.0 Hz, <sup>2</sup>*J*<sub>CF</sub>), 142.4, 141.4, 138.9, 136.7, 130.3, 129.0, 128.5, 127.8, 127.6(d, *J* = 5.0 Hz, <sup>3</sup>*J*<sub>CF</sub>), 126.7, 126.5, 126.2, 126.1, 125.9, 125.2, 120.6, 119.1, 116.7(d, *J* = 20.0 Hz, <sup>2</sup>*J*<sub>CF</sub>), 114.2, 111.7, 56.2, 44.1;

**<sup>19</sup>F NMR (376 MHz, CDCl<sub>3</sub>)** δ -137.28.

HRMS (ESI) *m/z* calcd for C<sub>29</sub>H<sub>22</sub>FN<sub>2</sub>O<sup>+</sup> (M+H)<sup>+</sup> 433.1710, found 433.1713.



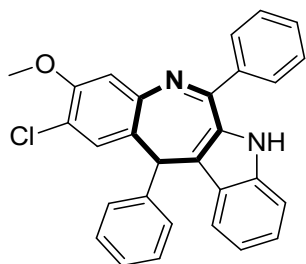

**10-chloro-9-methoxy-6,12-diphenyl-5,12-dihydrobenzo[6,7]azepino[3,4-b]indole (5u)**

Yield 62 %; 139.2 mg; yellow solid; column chromatography, silica gel (PE/EA, 8:1);

mp 248-250 °C;

<sup>1</sup>H NMR (400 MHz, CDCl<sub>3</sub>) δ 8.11 (s, 1H), 7.93 (d, *J* = 8.0 Hz, 1H), 7.71 (d, *J* = 6.8 Hz, 2H), 7.43 (dd, *J* = 15.6, 8.8 Hz, 4H), 7.34 (d, *J* = 5.2 Hz, 2H), 7.27 (d, *J* = 7.2 Hz, 1H), 7.18 (s, 1H), 7.08–6.97 (m, 3H), 6.94 (d, *J* = 7.6 Hz, 2H), 5.67 (s, 1H), 3.94 (s, 3H);

<sup>13</sup>C NMR (100 MHz, CDCl<sub>3</sub>) δ 157.4, 153.6, 145.5, 141.3, 138.8, 136.8, 130.7, 130.5, 129.1, 128.6, 128.3, 127.9, 126.8, 126.6, 126.2, 126.0, 125.4, 121.1, 120.8, 119.2, 112.6, 111.7, 56.3, 44.0;

HRMS (ESI) *m/z* calcd for C<sub>29</sub>H<sub>22</sub>ClN<sub>2</sub>O<sup>+</sup> (M+H)<sup>+</sup> 449.1415, found 449.1418.

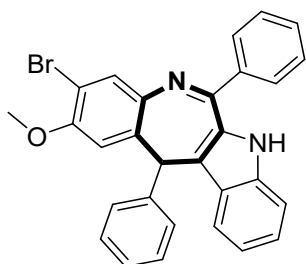

**9-bromo-10-methoxy-6,12-diphenyl-5,12-dihydrobenzo[6,7]azepino[3,4-b]indole (5v)**

Yield 57%; 140.5 mg; yellow solid; column chromatography, silica gel (PE/EA, 8:1);

mp 291-293 °C;

<sup>1</sup>H NMR (400 MHz, CDCl<sub>3</sub>) δ 7.97 (d, *J* = 8.4 Hz, 2H), 7.72 (d, *J* = 2.4 Hz, 4H), 7.43 (dd, *J* = 17.6, 10.0 Hz, 5H), 7.09–6.92 (m, 6H), 5.74 (s, 1H), 3.99 (s, 3H).

<sup>13</sup>C NMR (100 MHz, CDCl<sub>3</sub>) δ 155.9, 153.9, 140.4, 138.9, 138.0, 136.9, 134.8, 132.3, 129.3, 129.1, 128.4, 127.4, 126.8, 125.8, 125.2, 124.7, 123.7, 119.1, 117.7, 111.7, 111.5, 108.0, 55.6, 43.9.

HRMS (ESI) *m/z* calcd for C<sub>29</sub>H<sub>22</sub>BrN<sub>2</sub>O<sup>+</sup> (M+H)<sup>+</sup> 493.0910, found 493.0911.

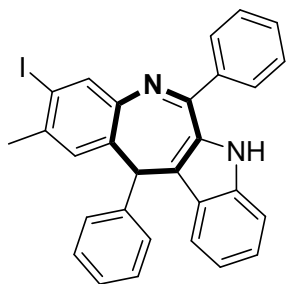

**9-iodo-10-methyl-6,12-diphenyl-5,12-dihydrobenzo[6,7]azepino[3,4-b]indole (5w)**

Yield 33%; 86.5 mg; white solid; column chromatography, silica gel (PE/EA, 12:1);

mp 318-320 °C;

**<sup>1</sup>H NMR (400 MHz, CDCl<sub>3</sub>)** δ 8.10 (d, *J* = 11.2 Hz, 2H), 7.94 (d, *J* = 8.0 Hz, 1H), 7.73 (d, *J* = 6.4 Hz, 2H), 7.45 (t, *J* = 7.6 Hz, 3H), 7.39–7.33 (m, 3H), 7.29 (d, *J* = 3.2 Hz, 1H), 7.04 (m, *J* = 14.0, 6.8 Hz, 3H), 6.94 (d, *J* = 7.2 Hz, 2H), 5.70 (s, 1H), 2.49 (s, 3H).

**<sup>13</sup>C NMR (100 MHz, CDCl<sub>3</sub>)** δ 157.1, 145.0, 141.1, 140.4, 139.5, 139.2, 138.9, 136.8, 135.0, 130.5, 130.4, 129.2, 128.6, 127.9, 126.8, 126.7, 126.2, 126.1, 125.3, 120.7, 119.2, 111.7, 98.2, 44.8, 27.3.

HRMS (ESI) *m/z* calcd for C<sub>29</sub>H<sub>22</sub>IN<sub>2</sub><sup>+</sup> (M+H)<sup>+</sup> 525.0822, found 525.0824.

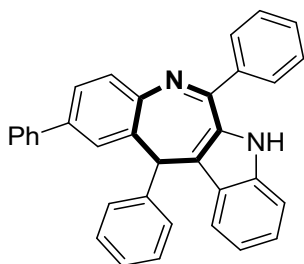

**6,10,12-triphenyl-5,12-dihydrobenzo[6,7]azepino[3,4-b]indole (5x)**

Yield 65%; 149.5 mg; yellow solid; column chromatography, silica gel (PE/EA, 12:1);

mp 274-276 °C;

**<sup>1</sup>H NMR (600 MHz, CDCl<sub>3</sub>)** δ 8.15 (s, 1H), 7.95 (d, *J* = 7.8 Hz, 1H), 7.73 (d, *J* = 7.2 Hz, 2H), 7.70 (s, 1H), 7.69–7.65 (m, 3H), 7.61 (d, *J* = 8.4 Hz, 1H), 7.46–7.39 (m, 5H), 7.35–7.21 (m, 5H), 7.05–7.02 (m, 2H), 6.98 (d, *J* = 7.8 Hz, 2H), 5.84 (s, 1H).

**<sup>13</sup>C NMR (150 MHz, CDCl<sub>3</sub>)** δ 156.7, 145.1, 141.5, 140.3, 140.2, 139.0, 136.8, 135.4, 130.3, 130.0, 129.2, 128.8, 128.5, 128.3, 127.8, 127.3, 127.0, 126.9, 126.8, 126.4, 126.13, 126.11, 125.7, 125.1, 120.5, 119.2, 111.7, 45.4.

HRMS (ESI) *m/z* calcd for C<sub>34</sub>H<sub>25</sub>N<sub>2</sub><sup>+</sup> (M+H)<sup>+</sup> 461.2012, found 461.2010.

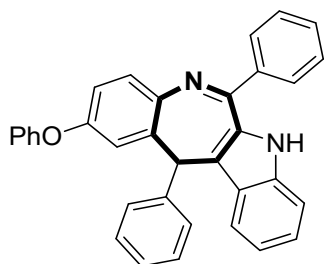

**10-phenoxy-6,12-diphenyl-5,12-dihydrobenzo[6,7]azepino[3,4-b]indole (5y)**

Yield 60%; 142.8 mg; yellow solid; column chromatography, silica gel (PE/EA, 10:1);

mp 150-152 °C;

<sup>1</sup>H NMR (400 MHz, CDCl<sub>3</sub>) δ 8.15 (s, 1H), 7.92 (d, *J* = 8.0 Hz, 1H), 7.76–7.72 (m, 2H), 7.61 (d, *J* = 8.4 Hz, 1H), 7.44 (t, *J* = 6.0 Hz, 3H), 7.36 (t, *J* = 8.0 Hz, 4H), 7.29–7.26 (m, 1H), 7.13 (s, 2H), 7.09–7.00 (m, 6H), 6.95 (d, *J* = 7.6 Hz, 2H), 5.68 (s, 1H).

<sup>13</sup>C NMR (100 MHz, CDCl<sub>3</sub>) δ 157.0, 156.9, 155.8, 141.3, 136.8, 136.3, 131.2, 130.3, 129.8, 129.2, 128.6, 127.9, 126.8, 126.2, 125.2, 123.5, 120.6, 119.24, 119.22, 119.17, 117.2, 111.7, 45.2.

HRMS (ESI) *m/z* calcd for C<sub>34</sub>H<sub>25</sub>N<sub>2</sub>O<sup>+</sup> (M+H)<sup>+</sup> 477.1961, found 477.1962.

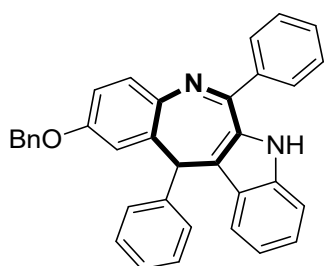

**10-(benzyloxy)-6,12-diphenyl-5,12-dihydrobenzo[6,7]azepino[3,4-b]indole (5z)**

Yield 61%; 149.5 mg; yellow solid; column chromatography; silica gel (PE/EA, 10:1);

mp 149-151 °C;

<sup>1</sup>H NMR (400 MHz, CDCl<sub>3</sub>) δ 8.12 (s, 1H), 7.94 (d, *J* = 8.0 Hz, 1H), 7.74–7.70 (m, 2H), 7.58 (d, *J* = 8.0 Hz, 1H), 7.42 (m, *J* = 12.0, 7.6 Hz, 9H), 7.34 (d, *J* = 4.0 Hz, 3H), 7.29–7.25 (m, 1H), 7.11 (d, *J* = 2.4 Hz, 1H), 7.02 (m, *J* = 6.0, 5.2 Hz, 4H), 6.95 (d, *J* = 7.6 Hz, 2H), 5.71 (s, 1H), 5.12 (s, 2H);

<sup>13</sup>C NMR (100 MHz, CDCl<sub>3</sub>) δ 158.7, 155.0, 141.5, 136.7, 136.0, 131.2, 130.1, 129.1, 128.6, 128.5, 128.0, 127.9, 127.6, 126.9, 126.8, 126.2, 126.1, 125.0, 120.5, 119.1, 115.6, 113.4, 111.7, 70.3, 45.4;

HRMS (ESI) *m/z* calcd for C<sub>35</sub>H<sub>27</sub>N<sub>2</sub>O<sup>+</sup> (M+H)<sup>+</sup> 491.2117, found 491.2118.

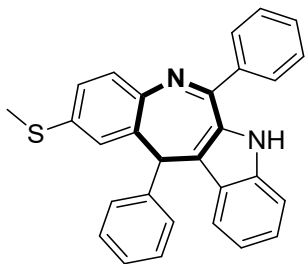

**10-(methylthio)-6,12-diphenyl-5,12-dihydrobenzo[6,7]azepino[3,4-b]indole (5aa)**

Yield 68%; 146.2 mg; yellow solid; column chromatography, silica gel (PE/EA, 10:1);

mp 190-192 °C;

**<sup>1</sup>H NMR (400 MHz, CDCl<sub>3</sub>)** δ 8.15 (s, 1H), 7.94 (d, *J* = 8.0 Hz, 1H), 7.71 (dd, *J* = 7.6, 1.6 Hz, 2H), 7.53 (d, *J* = 8.4 Hz, 1H), 7.41 (dd, *J* = 8.8, 4.8 Hz, 3H), 7.33 (dd, *J* = 8.4, 4.4 Hz, 3H), 7.27–7.23 (m, 2H), 7.06–6.93 (m, 5H), 5.72 (s, 1H), 2.53 (s, 3H);

**<sup>13</sup>C NMR (100 MHz, CDCl<sub>3</sub>)** δ 156.3, 143.3, 141.3, 139.0, 137.8, 136.8, 135.3, 130.3, 130.1, 129.1, 128.5, 127.8, 127.3, 126.8, 126.2, 126.1, 125.1, 125.0, 120.6, 119.1, 111.7, 45.2, 15.9;

HRMS (ESI) *m/z* calcd for C<sub>29</sub>H<sub>23</sub>N<sub>2</sub>S<sup>+</sup> (M+H)<sup>+</sup> 431.1576, found 431.1579.

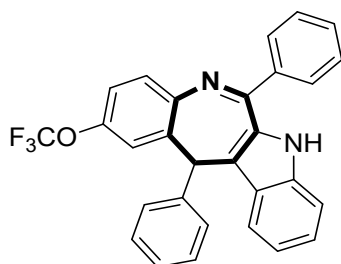

**6,12-diphenyl-10-(trifluoromethoxy)-5,12-dihydrobenzo[6,7]azepino[3,4-b]indole (5ab)**

Yield 59%; 138.1 mg; yellow solid; column chromatography, silica gel (PE/EA, 8:1);

mp 153-155 °C;

**<sup>1</sup>H NMR (400 MHz, CDCl<sub>3</sub>)** δ 8.15 (s, 1H), 7.96 (d, *J* = 8.0 Hz, 1H), 7.73 (d, *J* = 6.8 Hz, 2H), 7.62 (d, *J* = 8.8 Hz, 1H), 7.48–7.41 (m, 3H), 7.38 (d, *J* = 3.6 Hz, 2H), 7.34 (s, 1H), 7.30 (dd, *J* = 8.0, 4.0 Hz, 1H), 7.23 (s, 1H), 7.09–6.99 (m, 3H), 6.92 (d, *J* = 7.6 Hz, 2H), 5.74 (s, 1H);

**<sup>13</sup>C NMR (100 MHz, CDCl<sub>3</sub>)** δ 157.2, 148.3, 144.5, 140.7, 138.8, 136.8, 136.3, 130.8, 130.6, 129.2, 128.6, 128.0, 126.8, 126.6, 126.4, 126.1, 125.4, 120.8, 120.5(q, *J* = 239.0 Hz, <sup>1</sup>*J*<sub>CF</sub>), 119.2, 111.8, 45.0;

**<sup>19</sup>F NMR (376 MHz, CDCl<sub>3</sub>)** δ -57.65.

HRMS (ESI) *m/z* calcd for C<sub>29</sub>H<sub>20</sub>F<sub>3</sub>N<sub>2</sub>O<sup>+</sup> (M+H)<sup>+</sup> 469.1522, found 469.1523.

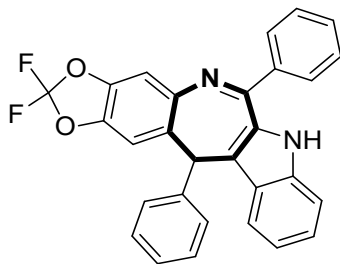

**2,2-difluoro-6,12-diphenyl-7,12-dihydro-  
[1,3]dioxolo[4'',5'':4',5']benzo[1',2':6,7]azepino[3,4-b]indole (5ac)**

Yield 52%; 120.6 mg; yellow solid; column chromatography, silica gel (PE/EA, 5:1);

mp 319-321 °C;

<sup>1</sup>H NMR (400 MHz, CDCl<sub>3</sub>) δ 8.06 (s, 1H), 7.90 (d, *J* = 8.0 Hz, 1H), 7.68 (d, *J* = 7.2 Hz, 2H), 7.45–7.37 (m, 3H), 7.35–7.30 (m, 1H), 7.25 (t, *J* = 6.8 Hz, 3H), 7.14 (s, 1H), 7.01 (dq, *J* = 13.6, 6.8 Hz, 3H), 6.89 (d, *J* = 7.6 Hz, 2H), 5.68 (s, 1H);

<sup>13</sup>C NMR (100 MHz, CDCl<sub>3</sub>) δ 156.8, 143.1, 142.7, 142.3, 140.7, 138.5, 136.9, 130.6, 130.5, 129.2, 128.6, 128.1 (dd, *J* = 252.0 Hz, <sup>1</sup>*J*<sub>CF</sub>), 127.9, 126.7, 126.4, 126.2, 125.8, 125.4, 120.8, 119.0, 111.8, 110.0, 109.7, 44.9;

<sup>19</sup>F NMR (376 MHz, CDCl<sub>3</sub>) δ -49.43, -49.69, -49.97, -50.22.

HRMS (ESI) *m/z* calcd for C<sub>29</sub>H<sub>19</sub>F<sub>2</sub>N<sub>2</sub>O<sub>2</sub><sup>+</sup> (M+H)<sup>+</sup> 465.1409, found 465.1412.

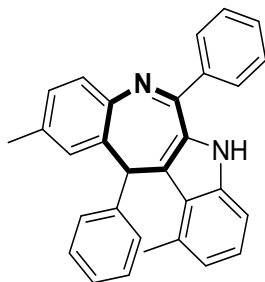

**1,10-dimethyl-6,12-diphenyl-5,12-dihydrobenzo[6,7]azepino[3,4-b]indole (6a)**

Yield 41%; 76.8 mg; yellow solid; column chromatography, silica gel (PE/EA, 12:1);

mp 185-187 °C;

<sup>1</sup>H NMR (400 MHz, CDCl<sub>3</sub>) δ 8.03 (s, 1H), 7.65 (d, *J* = 6.8 Hz, 2H), 7.48 (d, *J* = 8.0 Hz, 1H), 7.39 (t, *J* = 6.8 Hz, 3H), 7.25 (s, 1H), 7.17 (dd, *J* = 14.4, 6.8 Hz, 3H), 7.06–6.92 (m, 6H), 6.13 (s, 1H), 2.93 (s, 3H), 2.43 (s, 3H).

<sup>13</sup>C NMR (100 MHz, CDCl<sub>3</sub>) δ 156.3, 143.6, 142.2, 139.3, 137.2, 136.9, 135.5, 131.8, 130.3, 130.1, 129.1, 129.0, 128.4, 127.9, 127.64, 127.56, 126.9, 126.8, 125.9, 124.7, 122.3, 109.7, 46.5, 21.0.

HRMS (ESI) *m/z* calcd for C<sub>30</sub>H<sub>25</sub>N<sub>2</sub><sup>+</sup> (M+H)<sup>+</sup> 413.2012, found 413.2013.

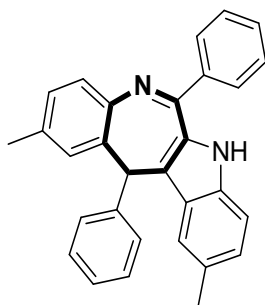

**2,10-dimethyl-6,12-diphenyl-5,12-dihydrobenzo[6,7]azepino[3,4-b]indole (6b)**

Yield 75%; 88.5 mg; yellow solid; column chromatography, silica gel (PE/EA, 12:1);

mp 211-213 °C;

<sup>1</sup>H NMR (400 MHz, CDCl<sub>3</sub>) δ 7.89 (s, 1H), 7.69 (s, 3H), 7.46 (d, *J* = 8.0 Hz, 1H), 7.37 (d, *J* = 6.4 Hz, 3H), 7.22–7.05 (m, 4H), 7.03–6.92 (m, 5H), 5.67 (s, 1H), 2.49 (s, 3H), 2.40 (s, 3H).

<sup>13</sup>C NMR (100 MHz, CDCl<sub>3</sub>) δ 156.1, 143.6, 141.8, 139.3, 137.4, 135.1, 134.8, 130.3, 130.1, 129.8, 129.4, 129.1, 128.4, 127.8, 126.9, 126.83, 126.77, 126.4, 125.9, 118.4, 111.3, 45.1, 21.6, 21.0.

HRMS (ESI) *m/z* calcd for C<sub>30</sub>H<sub>25</sub>N<sub>2</sub><sup>+</sup> (M+H)<sup>+</sup> 413.2012, found 413.2017.

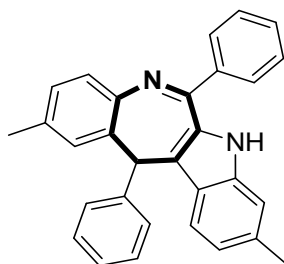

**3,10-dimethyl-6,12-diphenyl-5,12-dihydrobenzo[6,7]azepino[3,4-b]indole (6c)**

Yield 73%; 91.2 mg; yellow solid; column chromatography, silica gel (PE/EA, 12:1);

mp 170-172 °C;

<sup>1</sup>H NMR (400 MHz, CDCl<sub>3</sub>) δ 7.90 (s, 1H), 7.81 (d, *J* = 8.4 Hz, 1H), 7.70 (d, *J* = 6.4 Hz, 2H), 7.50 (d, *J* = 8.0 Hz, 1H), 7.39 (d, *J* = 6.8 Hz, 3H), 7.26 (s, 1H), 7.17 (d, *J* = 8.0 Hz, 1H), 7.07 (d, *J* = 6.4 Hz, 2H), 7.03–6.92 (m, 5H), 5.68 (s, 1H), 2.46 (s, 3H), 2.41 (s, 3H).

<sup>13</sup>C NMR (100 MHz, CDCl<sub>3</sub>) δ 156.0, 143.6, 141.8, 139.3, 137.4, 137.2, 135.3, 134.7, 130.3, 130.1, 129.4, 129.1, 128.5, 127.81, 127.76, 126.8, 126.5, 126.3, 126.0, 124.2, 122.5, 118.8, 111.4, 45.3, 22.0, 21.0.

HRMS (ESI) *m/z* calcd for C<sub>30</sub>H<sub>25</sub>N<sub>2</sub><sup>+</sup> (M+H)<sup>+</sup> 413.2012, found 413.2014.

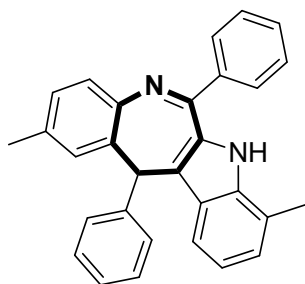

**4,10-dimethyl-6,12-diphenyl-5,12-dihydrobenzo[6,7]azepino[3,4-b]indole (6d)**

Yield 52%; 91.0 mg; yellow solid; column chromatography, silica gel (PE/EA, 12:1);

mp 264-266 °C;

<sup>1</sup>H NMR (600 MHz, CDCl<sub>3</sub>) δ 7.99 (s, 1H), 7.79 (dd, *J* = 30.6, 7.2 Hz, 3H), 7.52 (d, *J* = 7.8 Hz, 1H), 7.44 (t, *J* = 7.2 Hz, 3H), 7.27 (s, 1H), 7.22–7.12 (m, 3H), 7.07–6.93 (m, 5H), 5.71 (s, 1H), 2.41 (d, *J* = 8.4 Hz, 6H).

<sup>13</sup>C NMR (150 MHz, CDCl<sub>3</sub>) δ 156.1, 143.5, 141.7, 139.2, 137.5, 136.5, 134.8, 130.3, 130.2, 129.3, 129.2, 128.6, 127.8, 127.2, 126.8, 126.5, 126.0, 125.8, 125.4, 120.9, 120.8, 116.8, 115.3, 45.3, 21.0, 16.6.

HRMS (ESI) *m/z* calcd for C<sub>30</sub>H<sub>25</sub>N<sub>2</sub><sup>+</sup> (M+H)<sup>+</sup> 413.2012, found 413.2019.

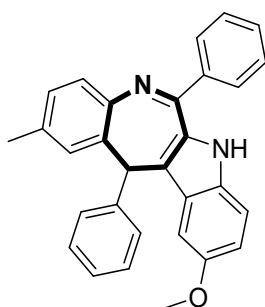

**2-methoxy-10-methyl-6,12-diphenyl-5,12-dihydrobenzo[6,7]azepino[3,4-b]indole (6e)**

Yield 76%; 70.5 mg; white solid; column chromatography, silica gel (PE/EA, 8:1);

mp 291-293 °C;

<sup>1</sup>H NMR (600 MHz, CDCl<sub>3</sub>) δ 8.00 (s, 1H), 7.72 (s, 2H), 7.51 (s, 1H), 7.42 (s, 3H), 7.31 (s, 2H), 7.25–7.18 (m, 2H), 7.09–6.94 (m, 6H), 5.66 (s, 1H), 3.93 (s, 3H), 2.44 (s, 3H).

<sup>13</sup>C NMR (150 MHz, CDCl<sub>3</sub>) δ 156.0, 154.7, 143.6, 141.8, 139.3, 137.4, 134.8, 132.1, 130.3, 130.1, 129.5, 129.1, 128.5, 127.9, 127.8, 127.6, 126.8, 126.5, 126.0, 125.9, 116.1, 112.6, 99.6, 55.8, 45.3, 21.0.

HRMS (ESI) *m/z* calcd for C<sub>30</sub>H<sub>25</sub>N<sub>2</sub>O<sup>+</sup> (M+H)<sup>+</sup> 429.1961, found 429.1965.

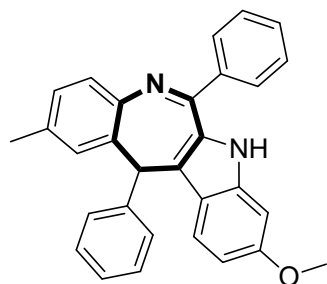

**3-methoxy-10-methyl-6,12-diphenyl-5,12-dihydrobenzo[6,7]azepino[3,4-b]indole (6f)**

Yield 75%; 83.9 mg; yellow solid; column chromatography, silica gel (PE/EA, 8:1);

mp 136-138 °C

<sup>1</sup>H NMR (400 MHz, CDCl<sub>3</sub>) δ 7.83 (d, *J* = 8.8 Hz, 1H), 7.73 (s, 2H), 7.46 (t, *J* = 19.6 Hz, 5H), 7.21 (d, *J* = 8.0 Hz, 1H), 7.09–6.90 (m, 7H), 6.81 (s, 1H), 5.68 (s, 1H), 3.86 (s, 3H), 2.43 (s, 3H).

<sup>13</sup>C NMR (100 MHz, CDCl<sub>3</sub>) δ 158.7, 155.8, 143.8, 141.8, 139.4, 137.8, 137.4, 134.6, 130.4, 130.1, 129.6, 129.2, 128.5, 127.9, 127.8, 126.8, 126.7, 126.02, 126.00, 120.8, 120.1, 111.4, 94.0, 55.6, 45.4, 21.0.

HRMS (ESI) *m/z* calcd for C<sub>30</sub>H<sub>25</sub>N<sub>2</sub>O<sup>+</sup> (M+H)<sup>+</sup> 429.1961, found 429.1963.

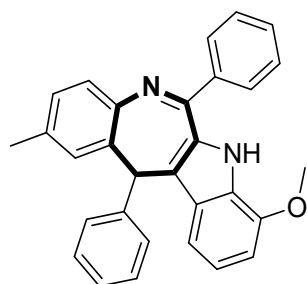

**4-methoxy-10-methyl-6,12-diphenyl-5,12-dihydrobenzo[6,7]azepino[3,4-b]indole (6g)**

Yield 34%; 82.6 mg; yellow solid; column chromatography, silica gel (PE/EA, 8:1);

mp 234-236 °C;

<sup>1</sup>H NMR (400 MHz, CDCl<sub>3</sub>) δ 8.28 (s, 1H), 7.73 (d, *J* = 6.4 Hz, 2H), 7.53 (t, *J* = 8.4 Hz, 2H), 7.40 (d, *J* = 6.4 Hz, 3H), 7.27 (s, 1H), 7.17 (dd, *J* = 14.8, 7.2 Hz, 2H), 7.05–7.01 (m, 2H), 6.96 (t, *J* = 9.2 Hz, 3H), 6.75 (d, *J* = 7.6 Hz, 1H), 5.69 (s, 1H), 3.89 (s, 3H), 2.41 (s, 3H).

<sup>13</sup>C NMR (100 MHz, CDCl<sub>3</sub>) δ 156.0, 146.4, 143.6, 141.8, 139.2, 137.4, 134.7, 130.4, 130.1, 129.4, 129.1, 128.5, 127.84, 127.77, 127.4, 126.9, 126.7, 126.5, 126.0, 120.9, 111.6, 104.2, 55.3, 45.5, 21.0.

HRMS (ESI) *m/z* calcd for C<sub>30</sub>H<sub>25</sub>N<sub>2</sub>O<sup>+</sup> (M+H)<sup>+</sup> 429.1961, found 429.1966.



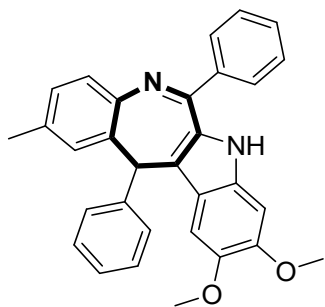

**2,3-dimethoxy-10-methyl-6,12-diphenyl-5,12-dihydrobenzo[6,7]azepino[3,4-b]indole (6h)**

Yield 41%; 91.3 mg; yellow solid; column chromatography, silica gel (PE/EA, 5:1);

mp 126-128 °C;

<sup>1</sup>H NMR (400 MHz, CDCl<sub>3</sub>) δ 7.94 (s, 1H), 7.73 (d, *J* = 7.6 Hz, 2H), 7.52 (d, *J* = 7.6 Hz, 1H), 7.42 (d, *J* = 6.4 Hz, 3H), 7.29 (d, *J* = 6.4 Hz, 2H), 7.20 (d, *J* = 8.0 Hz, 1H), 7.07–6.99 (m, 3H), 6.95 (d, *J* = 7.6 Hz, 2H), 6.82 (s, 1H), 5.64 (s, 1H), 4.02 (s, 3H), 3.92 (s, 3H), 2.44 (s, 3H).

<sup>13</sup>C NMR (100 MHz, CDCl<sub>3</sub>) δ 155.7, 149.8, 146.1, 141.9, 139.6, 137.3, 134.6, 131.9, 130.4, 130.1, 129.6, 129.3, 128.6, 128.5, 128.1, 127.9, 126.8, 126.0, 119.2, 99.7, 94.0, 56.4, 56.1, 45.5, 29.7, 21.0.

HRMS (ESI) *m/z* calcd for C<sub>31</sub>H<sub>27</sub>N<sub>2</sub>O<sub>2</sub><sup>+</sup> (M+H)<sup>+</sup> 459.2067, found 459.2067.

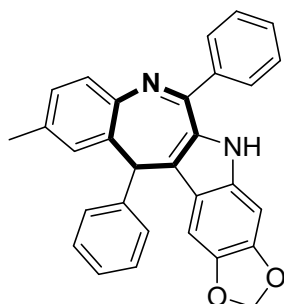

**10-methyl-6,12-diphenyl-5,12-dihydrobenzo[6,7]azepino[3,4-b][1,3]dioxolo[4,5-f]indole (6i)**

Yield 39%; 86.9 mg; yellow solid; column chromatography, silica gel (PE/EA, 5:1);

mp 157-159 °C;

<sup>1</sup>H NMR (400 MHz, CDCl<sub>3</sub>) δ 7.93 (s, 1H), 7.71 (d, *J* = 5.6 Hz, 2H), 7.50 (d, *J* = 8.0 Hz, 1H), 7.42 (d, *J* = 6.4 Hz, 3H), 7.19 (d, *J* = 8.0 Hz, 1H), 7.05 (t, *J* = 7.2 Hz, 2H), 7.00 (d, *J* = 6.8 Hz, 1H), 6.94 (d, *J* = 7.6 Hz, 2H), 6.76 (s, 1H), 6.00 (d, *J* = 8.4 Hz, 2H), 5.56 (s, 1H), 2.43 (s, 3H).

<sup>13</sup>C NMR (100 MHz, CDCl<sub>3</sub>) δ 155.6, 147.6, 143.9, 143.8, 141.8, 139.5, 137.3, 134.5, 132.6, 130.4, 130.1, 129.6, 129.2, 128.5, 127.8, 126.8, 126.6, 126.3, 126.0, 120.4, 101.1, 97.1, 92.0, 45.6, 21.0.

HRMS (ESI) *m/z* calcd for C<sub>30</sub>H<sub>23</sub>N<sub>2</sub>O<sub>2</sub><sup>+</sup> (M+H)<sup>+</sup> 443.1754, found 443.1756.

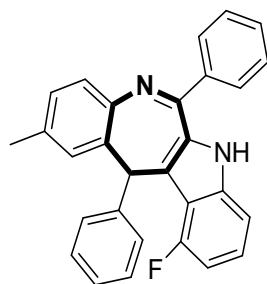

**1-fluoro-10-methyl-6,12-diphenyl-5,12-dihydrobenzo[6,7]azepino[3,4-b]indole (6j)**

Yield 43%; 72.2 mg; white solid; column chromatography, silica gel (PE/EA, 12:1);

mp 135-137 °C;

**<sup>1</sup>H NMR (400 MHz, CDCl<sub>3</sub>)** δ 8.11 (s, 1H), 7.69 (d, *J* = 7.2 Hz, 2H), 7.50 (d, *J* = 8.0 Hz, 1H), 7.42 (q, *J* = 6.0 Hz, 3H), 7.31 (s, 1H), 7.20 (d, *J* = 6.4 Hz, 2H), 7.08–7.03 (m, 3H), 6.98 (d, *J* = 7.6 Hz, 3H), 6.87 (dd, *J* = 11.2, 8.0 Hz, 1H), 6.04 (s, 1H), 2.43 (s, 3H).

**<sup>13</sup>C NMR (100 MHz, CDCl<sub>3</sub>)** δ 157.8(d, *J* = 247.0 Hz, <sup>1</sup>*J*<sub>CF</sub>), 155.5, 143.5, 141.9, 139.1, 138.8(d, *J* = 11.0 Hz, <sup>2</sup>*J*<sub>CF</sub>), 137.8, 135.0, 130.6, 130.3, 129.4, 129.0, 128.6, 128.0, 127.8, 127.0, 126.8, 126.0, 125.2(d, *J* = 8.0 Hz, <sup>3</sup>*J*<sub>CF</sub>), 124.4, 115.4(d, *J* = 19.0 Hz, <sup>2</sup>*J*<sub>CF</sub>), 107.7, 105.5(d, *J* = 19.0 Hz, <sup>2</sup>*J*<sub>CF</sub>), 46.3, 21.0.

**<sup>19</sup>F NMR (376 MHz, CDCl<sub>3</sub>)** δ -122.37.

HRMS (ESI) *m/z* calcd for C<sub>29</sub>H<sub>22</sub>FN<sub>2</sub><sup>+</sup> (M+H)<sup>+</sup> 417.1761, found 417.1762.

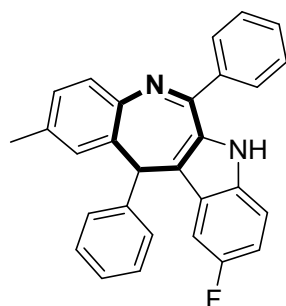

**2-fluoro-10-methyl-6,12-diphenyl-5,12-dihydrobenzo[6,7]azepino[3,4-b]indole (6k)**

Yield 68%; 77.5 mg; yellow solid; column chromatography, silica gel (PE/EA, 12:1);

mp 147-149 °C;

**<sup>1</sup>H NMR (400 MHz, CDCl<sub>3</sub>)** δ 8.05 (s, 1H), 7.71 (d, *J* = 6.4 Hz, 2H), 7.56 (d, *J* = 9.2 Hz, 1H), 7.49 (d, *J* = 8.0 Hz, 1H), 7.41 (q, *J* = 6.0 Hz, 3H), 7.25–7.19 (m, 3H), 7.09–6.98 (m, 4H), 6.93 (d, *J* = 7.6 Hz, 2H), 5.60 (s, 1H), 2.43 (s, 3H).

**<sup>13</sup>C NMR (100 MHz, CDCl<sub>3</sub>)** δ 158.2(d, *J* = 236.0 Hz, <sup>1</sup>*J*<sub>CF</sub>), 155.8, 143.4, 141.5, 139.0, 137.8, 134.6, 133.2, 130.4, 130.3, 129.6, 129.1, 128.6, 128.4, 128.0, 127.9, 126.8, 126.5(d, *J* = 10.0 Hz, <sup>3</sup>*J*<sub>CF</sub>), 126.2, 113.8(d, *J* = 26.0 Hz, <sup>2</sup>*J*<sub>CF</sub>), 112.5 (d, *J* = 9.0 Hz, <sup>3</sup>*J*<sub>CF</sub>), 103.7(d, *J* = 23.0 Hz, <sup>3</sup>*J*<sub>CF</sub>), 45.3, 21.0.

**<sup>19</sup>F NMR (376 MHz, CDCl<sub>3</sub>)** δ -122.68.

HRMS (ESI) *m/z* calcd for C<sub>29</sub>H<sub>22</sub>FN<sub>2</sub><sup>+</sup> (M+H)<sup>+</sup> 417.1761, found 417.1765.

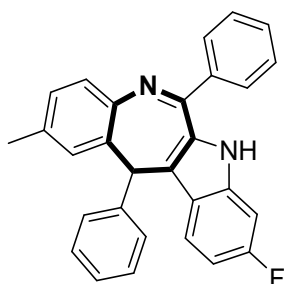

**3-fluoro-10-methyl-6,12-diphenyl-5,12-dihydrobenzo[6,7]azepino[3,4-b]indole (6l)**

Yield 63%; 72.5 mg; yellow solid; column chromatography, silica gel (PE/EA, 12:1);

mp 252-254 °C;

<sup>1</sup>H NMR (400 MHz, CDCl<sub>3</sub>) δ 8.04 (s, 1H), 7.86 (dd, *J* = 8.4, 5.6 Hz, 1H), 7.71 (d, *J* = 6.4 Hz, 2H), 7.46 (dd, *J* = 30.0, 7.2 Hz, 4H), 7.27 (s, 1H), 7.20 (d, *J* = 8.0 Hz, 1H), 7.02 (m, *J* = 21.6, 7.6 Hz, 5H), 6.93 (d, *J* = 7.6 Hz, 2H), 5.66 (s, 1H), 2.43 (s, 3H).

<sup>13</sup>C NMR (100 MHz, CDCl<sub>3</sub>) δ 161.6(d, *J* = 240.0 Hz, <sup>1</sup>*J*<sub>CF</sub>), 155.6, 143.6, 141.5, 139.1, 137.7, 136.7(d, *J* = 13.0 Hz, <sup>3</sup>*J*<sub>CF</sub>), 134.5, 130.34, 130.26, 129.6, 129.1, 128.6, 128.0, 127.9, 127.3, 126.8, 126.3, 126.1, 123.0, 120.3(d, *J* = 10.0 Hz, <sup>3</sup>*J*<sub>CF</sub>), 109.8(d, *J* = 25.0 Hz, <sup>2</sup>*J*<sub>CF</sub>), 97.8(d, *J* = 26.0 Hz, <sup>2</sup>*J*<sub>CF</sub>), 45.2, 21.0.

<sup>19</sup>F NMR (376 MHz, CDCl<sub>3</sub>) δ -116.00.

HRMS (ESI) *m/z* calcd for C<sub>29</sub>H<sub>22</sub>FN<sub>2</sub><sup>+</sup> (M+H)<sup>+</sup> 417.1761, found 417.1765.

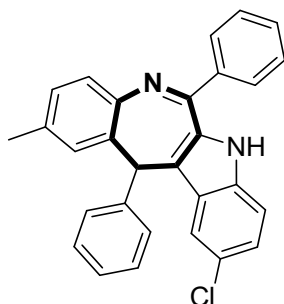

**2-chloro-10-methyl-6,12-diphenyl-5,12-dihydrobenzo[6,7]azepino[3,4-b]indole (6m)**

Yield 56%; 92.4 mg; yellow solid; column chromatography; silica gel (PE/EA, 12:1);

mp 152-154 °C;

<sup>1</sup>H NMR (400 MHz, CDCl<sub>3</sub>) δ 8.15 (s, 1H), 7.91 (s, 1H), 7.70 (d, *J* = 6.4 Hz, 2H), 7.50 (d, *J* = 8.0 Hz, 1H), 7.42 (d, *J* = 6.8 Hz, 3H), 7.29–7.25 (m, 3H), 7.20 (d, *J* = 8.0 Hz, 1H), 7.07–6.98 (m, 3H), 6.92 (d, *J* = 7.2 Hz, 2H), 5.63 (s, 1H), 2.43 (s, 3H).

<sup>13</sup>C NMR (100 MHz, CDCl<sub>3</sub>) δ 155.6, 143.4, 141.4, 139.0, 137.9, 134.9, 134.5, 130.4, 130.3, 129.6, 129.1, 128.6, 128.0, 127.9, 127.2, 126.8, 126.3, 126.2, 125.6, 125.3, 118.5, 112.8, 45.2, 21.0.

HRMS (ESI) *m/z* calcd for C<sub>29</sub>H<sub>22</sub>ClN<sub>2</sub><sup>+</sup> (M+H)<sup>+</sup> 433.1466, found 433.1467.

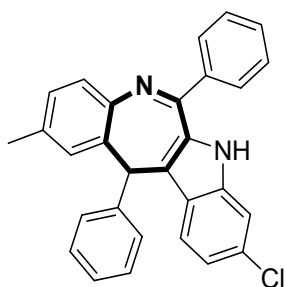

**3-chloro-10-methyl-6,12-diphenyl-5,12-dihydrobenzo[6,7]azepino[3,4-b]indole (6n)**

Yield 48%; 90.5 mg; yellow solid; column chromatography, silica gel (PE/EA, 12:1);

mp 153-155 °C;

<sup>1</sup>H NMR (400 MHz, CDCl<sub>3</sub>) δ 8.08 (s, 1H), 7.84 (d, *J* = 8.4 Hz, 1H), 7.69 (d, *J* = 6.4 Hz, 2H), 7.50 (d, *J* = 7.2 Hz, 1H), 7.41 (d, *J* = 6.4 Hz, 3H), 7.30 (s, 1H), 7.23 (dd, *J* = 16.0, 2.8 Hz, 3H), 7.01 (dd, *J* = 14.4, 6.0 Hz, 3H), 6.90 (d, *J* = 7.2 Hz, 2H), 5.65 (s, 1H), 2.43 (s, 3H).

<sup>13</sup>C NMR (100 MHz, CDCl<sub>3</sub>) δ 155.7, 143.4, 141.4, 138.8, 137.8, 136.9, 134.5, 130.9, 130.4, 129.5, 129.1, 128.6, 128.1, 127.9, 127.3, 126.8, 126.3, 126.2, 124.8, 121.5, 120.1, 111.5, 45.1, 21.0.

HRMS (ESI) *m/z* calcd for C<sub>29</sub>H<sub>22</sub>ClN<sub>2</sub><sup>+</sup> (M+H)<sup>+</sup> 433.1466, found 433.1468.

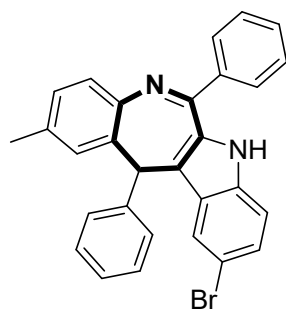

**2-bromo-10-methyl-6,12-diphenyl-5,12-dihydrobenzo[6,7]azepino[3,4-b]indole (6o)**

Yield 51%; 72.0 mg; yellow solid; column chromatography, silica gel (PE/EA, 12:1);

mp 188-190 °C

<sup>1</sup>H NMR (400 MHz, CDCl<sub>3</sub>) δ 8.10 (s, 1H), 8.06 (s, 1H), 7.69 (d, *J* = 7.2 Hz, 2H), 7.48 (d, *J* = 8.0 Hz, 1H), 7.40 (dd, *J* = 12.0, 8.0 Hz, 4H), 7.28 (s, 1H), 7.18 (t, *J* = 10.0 Hz, 2H), 7.07–6.99 (m, 3H), 6.92 (d, *J* = 7.6 Hz, 2H), 5.62 (s, 1H), 2.43 (s, 3H).

<sup>13</sup>C NMR (100 MHz, CDCl<sub>3</sub>) δ 155.6, 143.4, 141.3, 138.9, 137.9, 135.1, 134.5, 130.4, 130.3, 129.6, 129.0, 128.6, 128.1, 127.89, 127.86, 127.8, 126.8, 126.2, 125.4, 121.7, 113.7, 113.2, 45.1, 21.0.

HRMS (ESI) *m/z* calcd for C<sub>29</sub>H<sub>22</sub>BrN<sub>2</sub><sup>+</sup> (M+H)<sup>+</sup> 477.0960, found 477.0968.

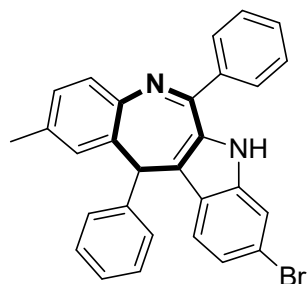

**3-bromo-10-methyl-6,12-diphenyl-5,12-dihydrobenzo[6,7]azepino[3,4-b]indole (6p)**

Yield 43%; 61.9 mg; yellow solid; column chromatography, silica gel (PE/EA, 12:1);

mp 109-111 °C;

<sup>1</sup>H NMR (600 MHz, CDCl<sub>3</sub>) δ 8.12 (s, 1H), 7.80 (d, *J* = 8.4 Hz, 1H), 7.69 (d, *J* = 7.8 Hz, 2H), 7.50 (d, *J* = 6.0 Hz, 2H), 7.44–7.42 (m, 2H), 7.35 (d, *J* = 8.4 Hz, 1H), 7.27 (d, *J* = 10.2 Hz, 2H), 7.21 (d, *J* = 7.8 Hz, 1H), 7.05–7.02 (m, 2H), 6.99 (d, *J* = 6.0 Hz, 1H), 6.91 (d, *J* = 7.8 Hz, 2H), 5.66 (s, 1H), 2.43 (s, 3H).

<sup>13</sup>C NMR (150 MHz, CDCl<sub>3</sub>) δ 155.6, 143.4, 141.4, 138.9, 137.8, 137.2, 134.5, 130.4, 129.7, 129.6, 129.1, 128.6, 128.1, 127.9, 127.2, 126.8, 126.2, 125.1, 124.0, 120.4, 118.5, 115.3, 114.6, 45.1, 21.0.

HRMS (ESI) *m/z* calcd for C<sub>29</sub>H<sub>22</sub>BrN<sub>2</sub><sup>+</sup> (M+H)<sup>+</sup> 477.0960, found 477.0965.

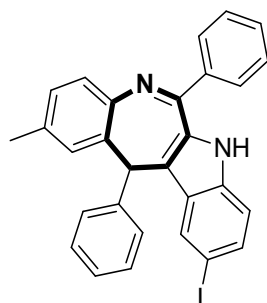

**2-iodo-10-methyl-6,12-diphenyl-5,12-dihydrobenzo[6,7]azepino[3,4-b]indole (6q)**

Yield 73%; 91.2 mg; yellow solid; column chromatography, silica gel (PE/EA, 12:1);

mp 255-257 °C;

<sup>1</sup>H NMR (400 MHz, CDCl<sub>3</sub>) δ 8.28 (s, 1H), 8.12 (s, 1H), 7.70 (d, *J* = 6.8 Hz, 2H), 7.56 (d, *J* = 8.8 Hz, 1H), 7.49 (d, *J* = 8.0 Hz, 1H), 7.42 (d, *J* = 6.4 Hz, 3H), 7.29 (s, 1H), 7.20 (d, *J* = 8.0 Hz, 1H), 7.11 (d, *J* = 8.8 Hz, 1H), 7.07–6.98 (m, 3H), 6.92 (d, *J* = 7.2 Hz, 2H), 5.62 (s, 1H), 2.44 (s, 3H).

<sup>13</sup>C NMR (100 MHz, CDCl<sub>3</sub>) δ 155.5, 143.4, 141.3, 139.0, 137.9, 135.6, 134.5, 133.2, 130.4, 130.3, 129.6, 129.1, 128.7, 128.6, 128.0, 127.9, 127.4, 126.8, 126.2, 125.1, 113.6, 83.7, 45.1, 21.0.

HRMS (ESI) *m/z* calcd for C<sub>29</sub>H<sub>22</sub>IN<sub>2</sub><sup>+</sup> (M+H)<sup>+</sup> 525.0822, found 525.0826.

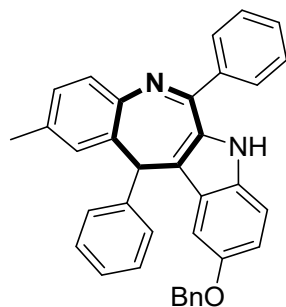

**2-(benzyloxy)-10-methyl-6,12-diphenyl-5,12-dihydrobenzo[6,7]azepino[3,4-b]indole (6r)**

Yield 53%; 76.8 mg; yellow solid; column chromatography, silica gel (PE/EA, 8:1);

mp 88-90 °C;

<sup>1</sup>H NMR (400 MHz, CDCl<sub>3</sub>) δ 7.96 (s, 1H), 7.73–7.69 (m, 2H), 7.50 (d, *J* = 7.2 Hz, 3H), 7.44–7.32 (m, 7H), 7.20 (dd, *J* = 16.4, 8.0 Hz, 3H), 7.09–6.97 (m, 4H), 6.94 (d, *J* = 7.6 Hz, 2H), 5.64 (s, 1H), 5.17 (s, 2H), 2.43 (s, 3H).

<sup>13</sup>C NMR (100 MHz, CDCl<sub>3</sub>) δ 156.0, 153.8, 143.6, 141.8, 139.2, 137.5, 137.2, 134.7, 132.3, 130.4, 130.2, 129.5, 129.2, 128.6, 128.5, 127.92, 127.88, 127.8, 127.7, 127.6, 126.8, 126.5, 126.0, 116.7, 112.6, 101.4, 70.8, 45.3, 21.0.

HRMS (ESI) *m/z* calcd for C<sub>36</sub>H<sub>29</sub>N<sub>2</sub>O<sup>+</sup> (M+H)<sup>+</sup> 505.2274, found 505.2276.

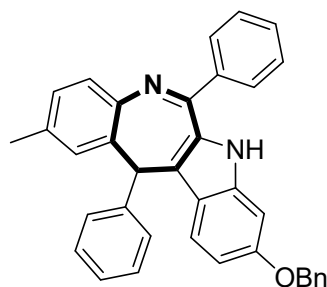

**3-(benzyloxy)-10-methyl-6,12-diphenyl-5,12-dihydrobenzo[6,7]azepino[3,4-b]indole (6s)**

Yield 49%; 88.5 mg; yellow solid; column chromatography, silica gel (PE/EA, 8:1);

mp 128-130 °C;

<sup>1</sup>H NMR (400 MHz, CDCl<sub>3</sub>) δ 7.92 (s, 1H), 7.82 (d, *J* = 8.8 Hz, 1H), 7.71 (d, *J* = 6.8 Hz, 2H), 7.50 (d, *J* = 8.0 Hz, 1H), 7.41 (m, *J* = 15.6, 7.6 Hz, 7H), 7.32 (d, *J* = 7.2 Hz, 1H), 7.18 (d, *J* = 8.0 Hz, 1H), 7.06–6.97 (m, 4H), 6.94 (d, *J* = 7.6 Hz, 2H), 6.82 (s, 1H), 5.65 (s, 1H), 5.11 (s, 2H), 2.42 (s, 3H).

<sup>13</sup>C NMR (100 MHz, CDCl<sub>3</sub>) δ 157.8, 155.7, 143.8, 141.8, 139.4, 137.7, 137.4, 137.0, 134.5, 130.4, 130.1, 129.6, 129.2, 128.6, 128.5, 128.0, 127.9, 127.8, 127.4, 126.8, 126.6, 126.1, 126.0, 121.0, 120.1, 112.0, 95.5, 70.4, 45.4, 26.9, 21.0.

HRMS (ESI) *m/z* calcd for C<sub>36</sub>H<sub>29</sub>N<sub>2</sub>O<sup>+</sup> (M+H)<sup>+</sup> 505.2274, found 505.2275.

## 6. Crystallographic data and molecular structure of 4b, 4r and 8d

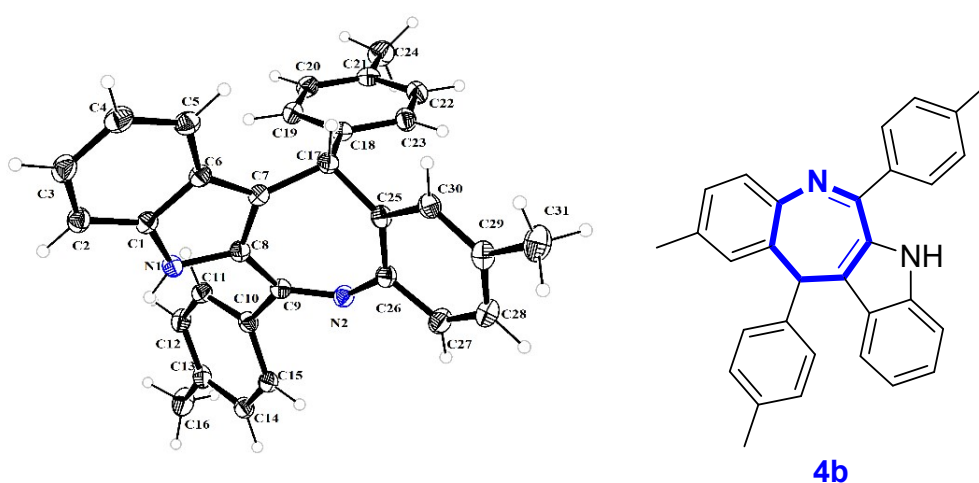

**Figure S1.** X-ray crystal structure of **4b**, thermal ellipsoids shown at 50% probability level. Sample preparation: 35 mg of **4b** was dissolved in 6 ml  $\text{CH}_2\text{Cl}_2$  and 1 ml  $\text{CH}_3\text{OH}$  at room temperature for slow evaporation about a week. The crystals were mounted on a glass fiber for diffraction experiments. Intensity data were collected on a Bruker SMART APEX CCD diffractometer with Mo  $K\alpha$  radiation (0.71073 Å) at room temperature. Crystal Data for Compound **4b**: CCDC 2131536 contains the supplementary crystallographic data for this paper. These data could be obtained free of charge from The Cambridge Crystallographic.

Bond precision: C-C = 0.0028 Å      Wavelength=1.34139

Cell:                    a=28.4438 (13)      b=28.4438 (13)      c=15.374 (1)  
                               alpha=90                beta=90                gamma=120

Temperature:            200 K

|                        | Calculated             | Reported     |
|------------------------|------------------------|--------------|
| Volume                 | 10771.9(12)            | 10771.9(12)  |
| Space group            | R -3                   | R -3         |
| Hall group             | -R 3                   | -R 3         |
| Moiety formula         | C31 H26 N2 [+ solvent] | C31 H26 N2   |
| Sum formula            | C31 H26 N2 [+ solvent] | C31 H26 N2   |
| Mr                     | 426.54                 | 426.54       |
| Dx, g cm <sup>-3</sup> | 1.184                  | 1.184        |
| Z                      | 18                     | 18           |
| Mu (mm <sup>-1</sup> ) | 0.335                  | 0.335        |
| F000                   | 4068.0                 | 4068.0       |
| F000'                  | 4075.85                |              |
| h, k, lmax             | 35, 35, 19             | 35, 35, 19   |
| Nref                   | 4932                   | 4926         |
| Tmin, Tmax             | 0.961, 0.967           | 0.697, 0.751 |
| Tmin'                  | 0.961                  |              |

Correction method= # Reported T Limits: Tmin=0.697 Tmax=0.751  
 AbsCorr = NONE

Data completeness= 0.999      Theta(max)= 57.061

R(reflections)= 0.0551( 4024)      wR2(reflections)=  
 0.1712( 4926)

S = 1.082      Npar= 301

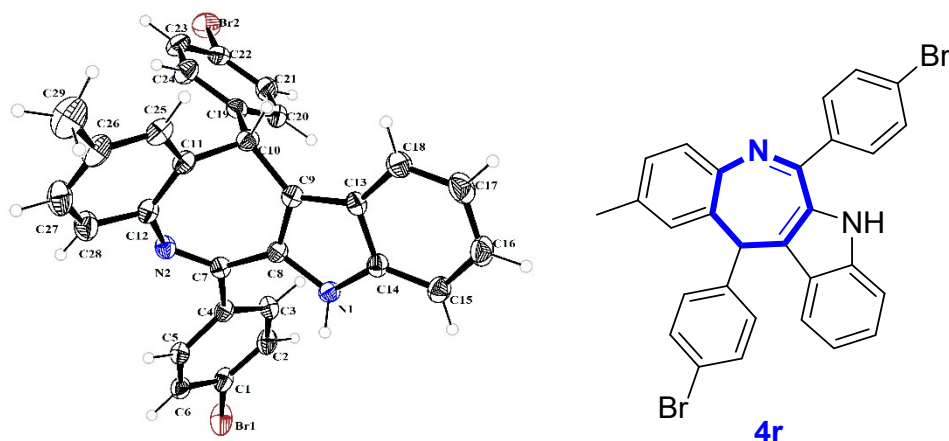

**Figure S2.** X-ray crystal structure of **4r**, thermal ellipsoids shown at 50% probability level. Sample preparation: 20 mg of **4r** was dissolved in 4 ml CH<sub>2</sub>Cl<sub>2</sub> and 1 ml CH<sub>3</sub>OH at room temperature for slow evaporation about a week. The crystals were mounted on a glass fiber for diffraction experiments. Intensity data were collected on a Bruker SMART APEX CCD diffractometer with Mo K $\alpha$  radiation (0.71073 Å) at room temperature. Crystal Data for Compound **4r**: CCDC 2143004 contains the



supplementary crystallographic data for this paper. These data could be obtained free of charge from The Cambridge Crystallographic.

Bond precision: C-C = 0.0058 Å Wavelength=0.71073  
Cell: a=28.250 (5) b=28.250 (5) c=15.849 (3)  
alpha=90 beta=90 gamma=120  
Temperature: 296 K

|                                     | Calculated                                                                 | Reported                                                       |
|-------------------------------------|----------------------------------------------------------------------------|----------------------------------------------------------------|
| Volume                              | 10954 (4)                                                                  | 10953 (5)                                                      |
| Space group                         | R -3                                                                       | R -3                                                           |
| Hall group                          | -R 3                                                                       | -R 3                                                           |
| Moiety formula                      | C <sub>29</sub> H <sub>20</sub> Br <sub>2</sub> N <sub>2</sub> [+ solvent] | C <sub>29</sub> H <sub>20</sub> Br <sub>2</sub> N <sub>2</sub> |
| Sum formula                         | C <sub>29</sub> H <sub>20</sub> Br <sub>2</sub> N <sub>2</sub> [+ solvent] | C <sub>29</sub> H <sub>20</sub> Br <sub>2</sub> N <sub>2</sub> |
| Mr                                  | 556.27                                                                     | 556.29                                                         |
| D <sub>x</sub> , g cm <sup>-3</sup> | 1.518                                                                      | 1.518                                                          |
| Z                                   | 18                                                                         | 18                                                             |
| Mu (mm <sup>-1</sup> )              | 3.350                                                                      | 3.350                                                          |
| F <sub>000</sub>                    | 5004.0                                                                     | 5004.0                                                         |
| F <sub>000</sub> '                  | 4995.43                                                                    |                                                                |
| h, k, lmax                          | 35, 35, 19                                                                 | 35, 35, 19                                                     |
| Nref                                | 5026                                                                       | 5018                                                           |
| Tmin, Tmax                          | 0.623, 0.715                                                               | 0.481, 0.745                                                   |
| Tmin'                               | 0.507                                                                      |                                                                |

Correction method= # Reported T Limits: Tmin=0.481 Tmax=0.745  
AbsCorr = MULTI-SCAN

Data completeness= 0.998 Theta (max)= 26.434

R(reflections)= 0.0440 ( 3046) wR2(reflections)=  
0.1004 ( 5018)  
S = 1.011 Npar= 299

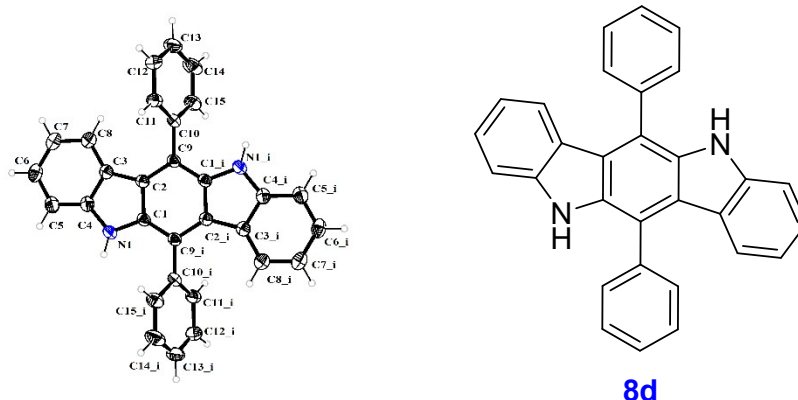

**Figure S2.** X-ray crystal structure of **8d**, thermal ellipsoids shown at 30% probability level. Sample preparation: 20 mg of **8d** was dissolved in 4 ml CH<sub>2</sub>Cl<sub>2</sub> and 1 ml CH<sub>3</sub>OH at room temperature for slow evaporation about a week. The crystals were

mounted on a glass fiber for diffraction experiments. Intensity data were collected on a Bruker SMART APEX CCD diffractometer with Mo K $\alpha$  radiation (0.71073 Å) at room temperature. Crystal Data for Compound **8d**: CCDC 2173150 contains the supplementary crystallographic data for this paper. These data could be obtained free of charge from The Cambridge Crystallographic.

Bond precision: C-C = 0.0041 Å                      Wavelength=0.71073  
Cell:                      a=12.108(2)                      b=12.563(2)                      c=12.924(2)  
                                    alpha=95.671(3)                      beta=91.801(3)                      gamma=90.084(3)  
Temperature:                      296 K

|                        | Calculated             | Reported     |
|------------------------|------------------------|--------------|
| Volume                 | 1955.3(5)              | 1955.2(6)    |
| Space group            | P -1                   | P -1         |
| Hall group             | -P 1                   | -P 1         |
| Moiety formula         | C30 H20 N2 [+ solvent] | 3(C15 H10 N) |
| Sum formula            | C30 H20 N2 [+ solvent] | C45 H30 N3   |
| Mr                     | 408.48                 | 612.72       |
| Dx, g cm <sup>-3</sup> | 1.041                  | 1.041        |
| Z                      | 3                      | 2            |
| Mu (mm <sup>-1</sup> ) | 0.061                  | 0.061        |
| F000                   | 642.0                  | 642.0        |
| F000'                  | 642.23                 |              |
| h, k, lmax             | 14, 14, 15             | 14, 14, 15   |
| Nref                   | 6915                   | 6856         |
| Tmin, Tmax             | 0.985, 0.988           | 0.632, 0.746 |
| Tmin'                  | 0.982                  |              |

Correction method= # Reported T Limits: Tmin=0.632 Tmax=0.746  
AbsCorr = MULTI-SCAN

Data completeness= 0.991                      Theta(max)= 25.025

R(reflections)= 0.0705( 4724)                      wR2(reflections)= 0.2472( 6856)

S = 1.035                      Npar= 433

---

The following ALERTS were generated. Each ALERT has the format  
**test-name\_ALERT\_alert-type\_alert-level.**  
Click on the hyperlinks for more details of the test.

## 7. $^1\text{H}$ and $^{13}\text{C}$ NMR spectra of compounds 4, 5 and 6

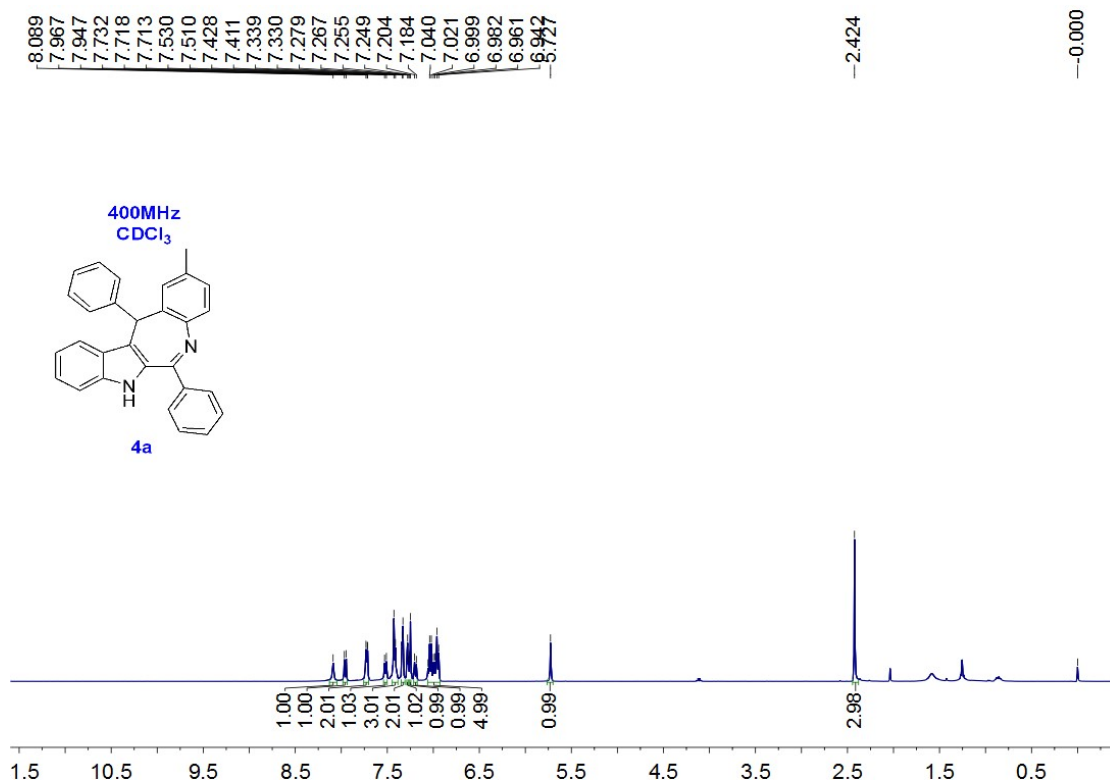

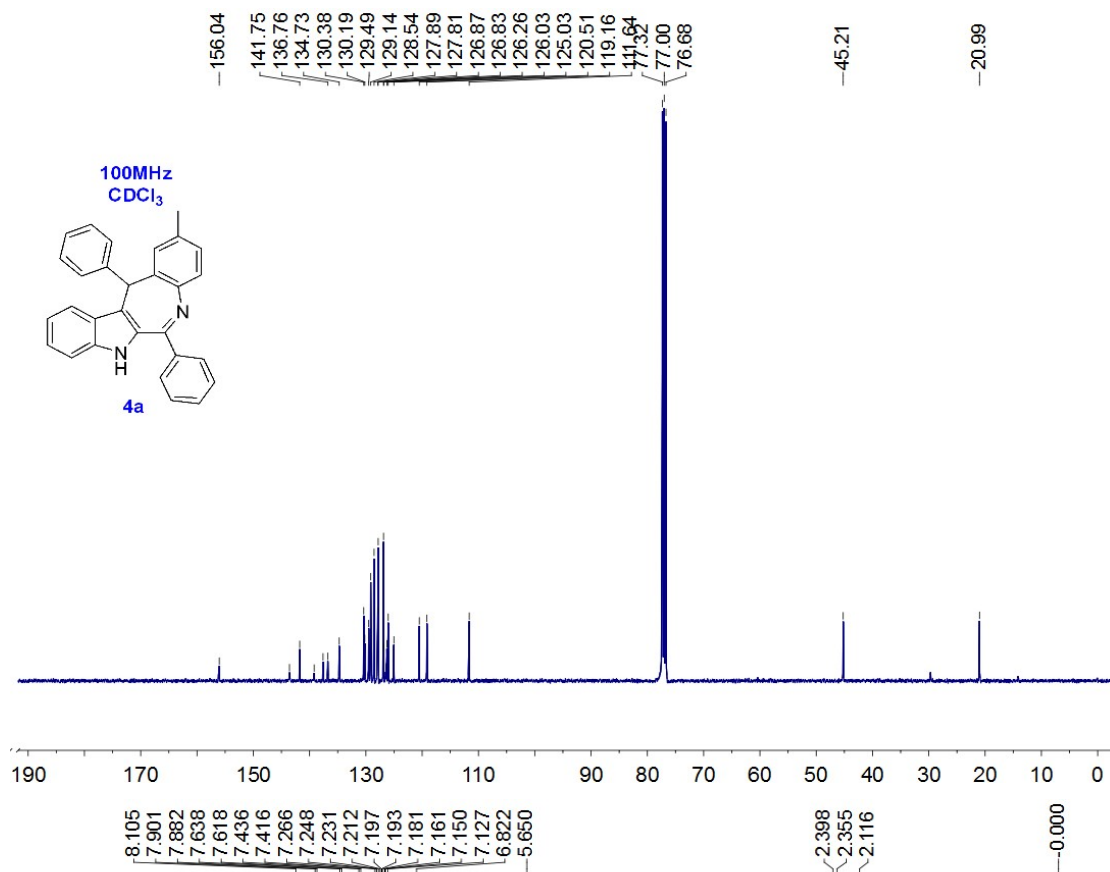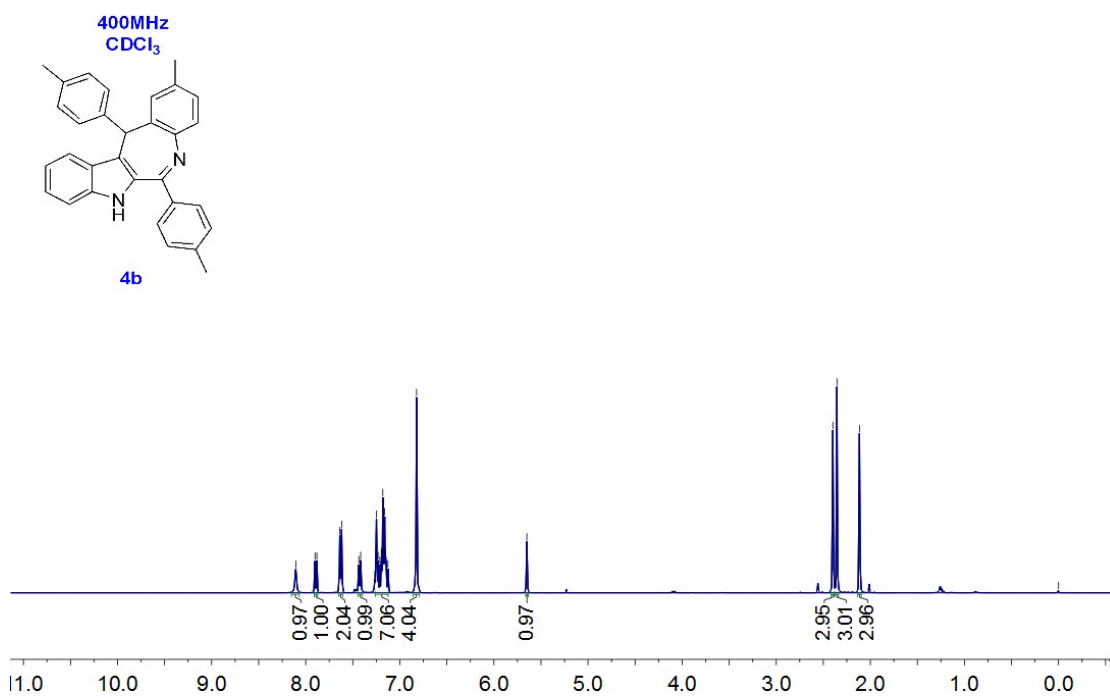

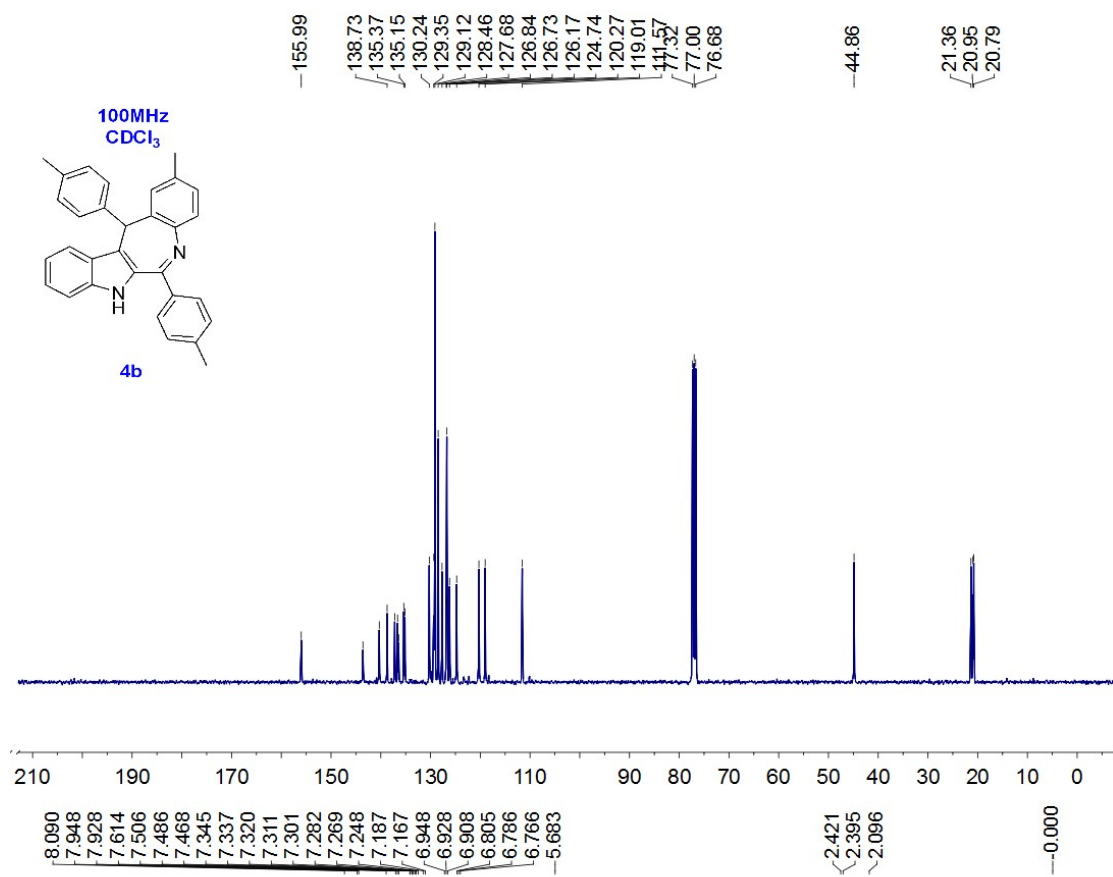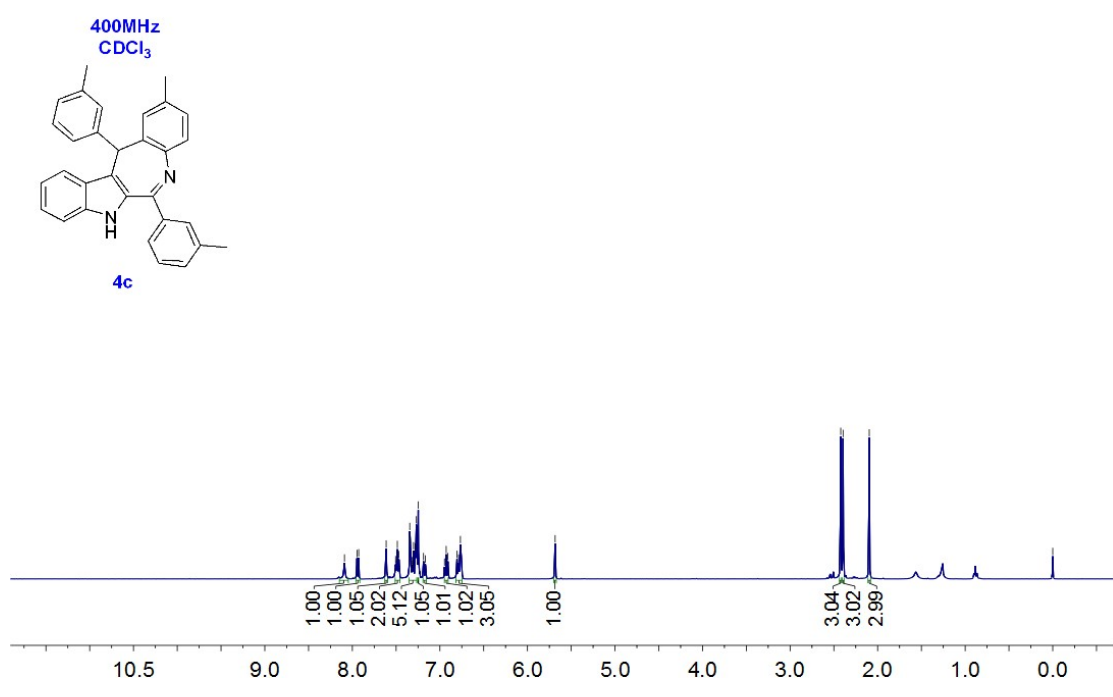

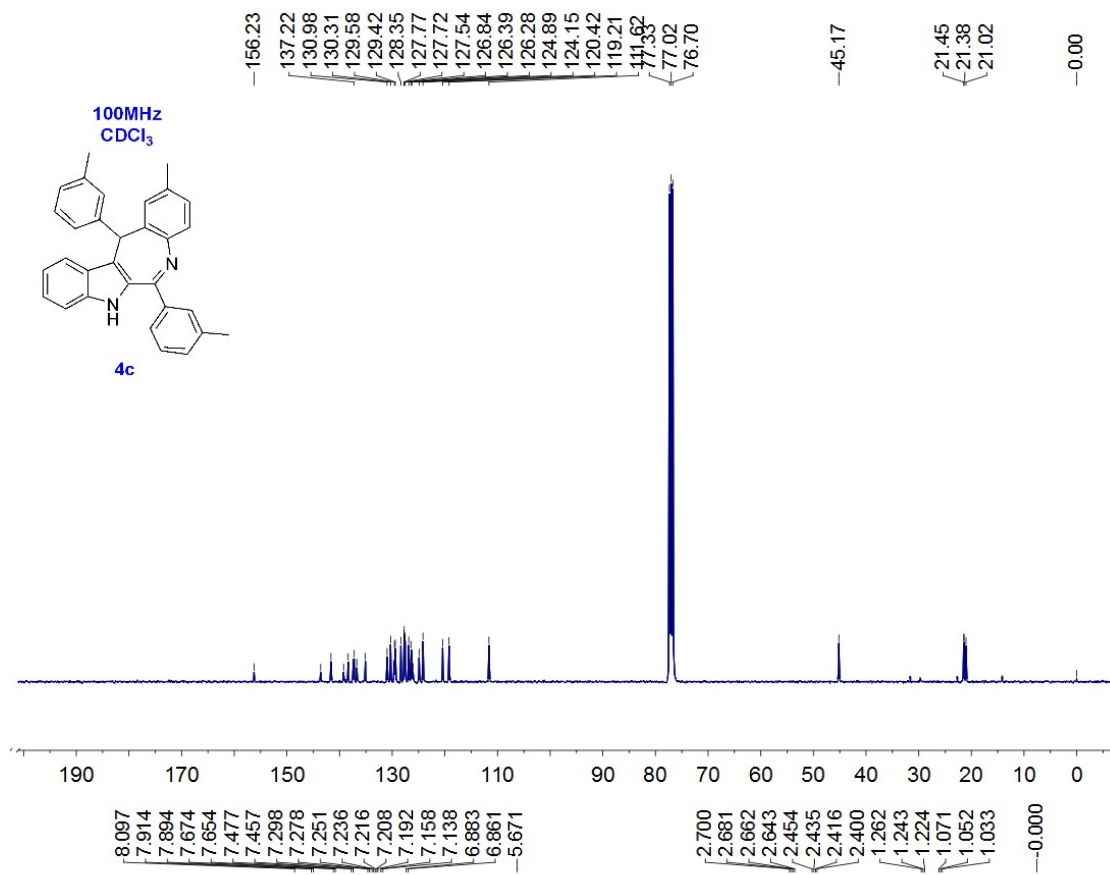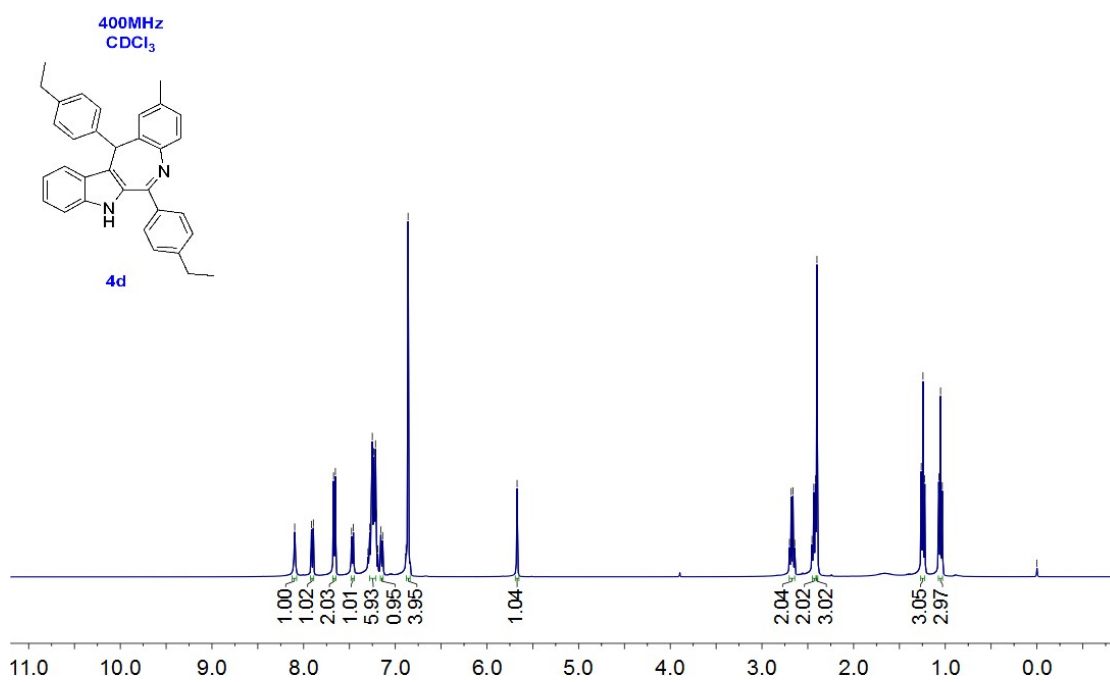

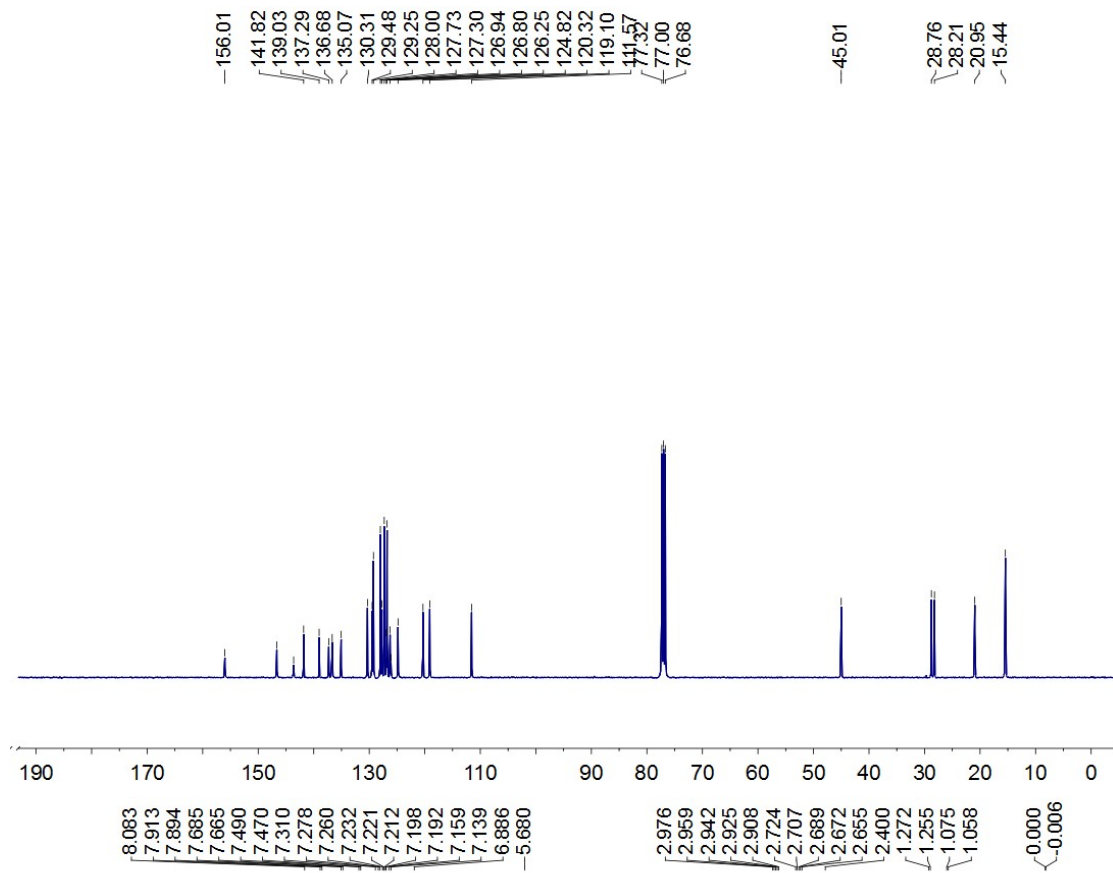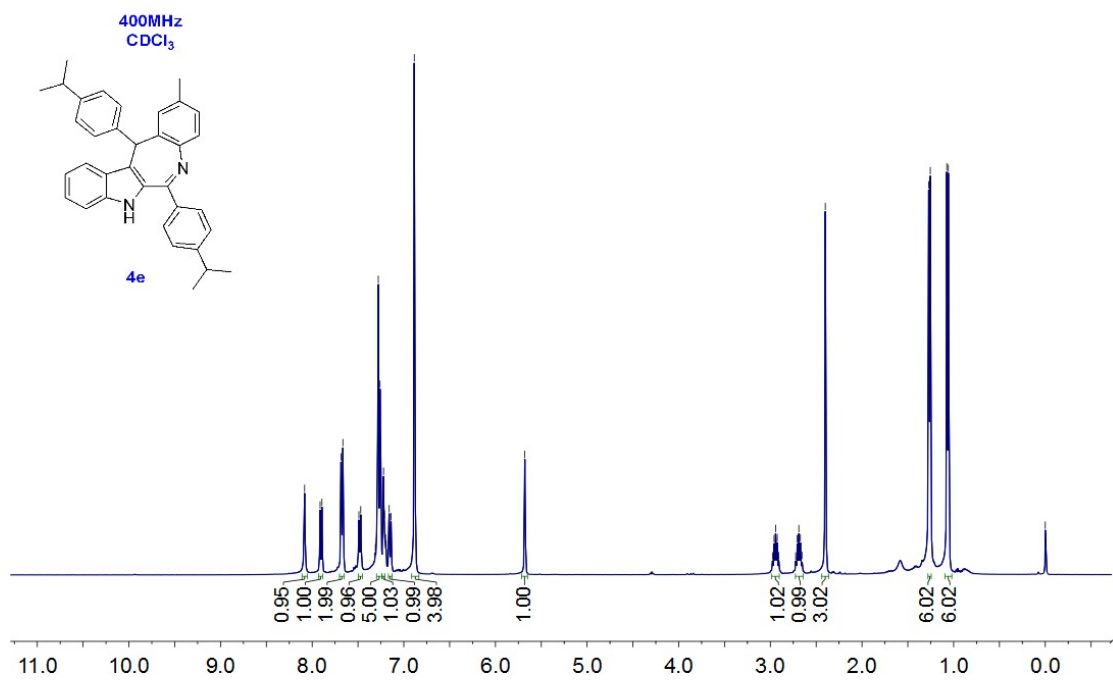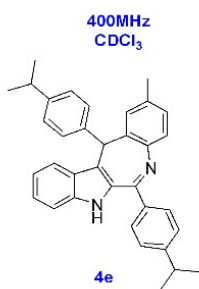

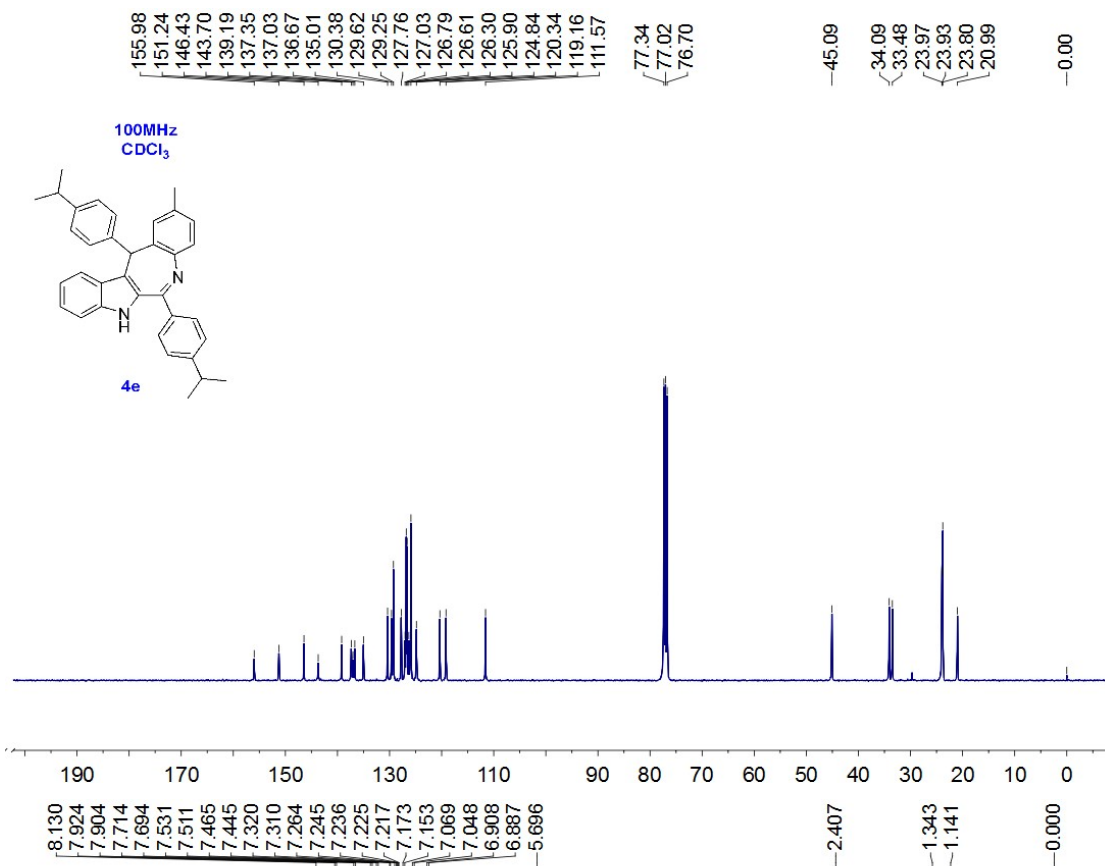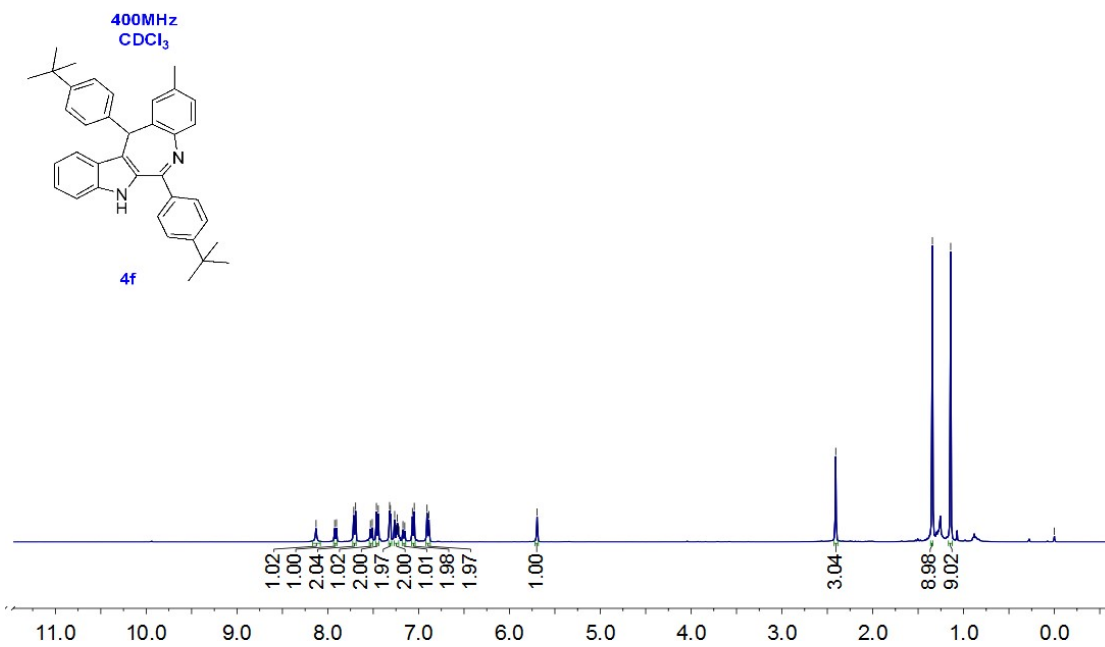



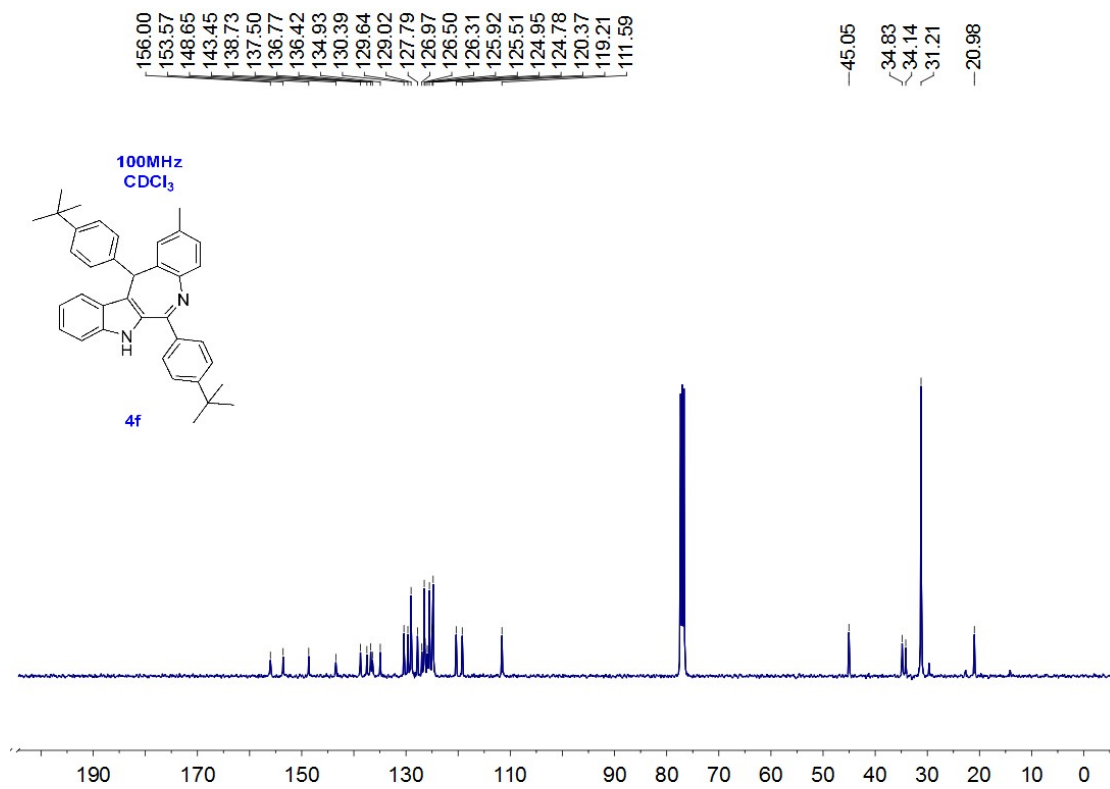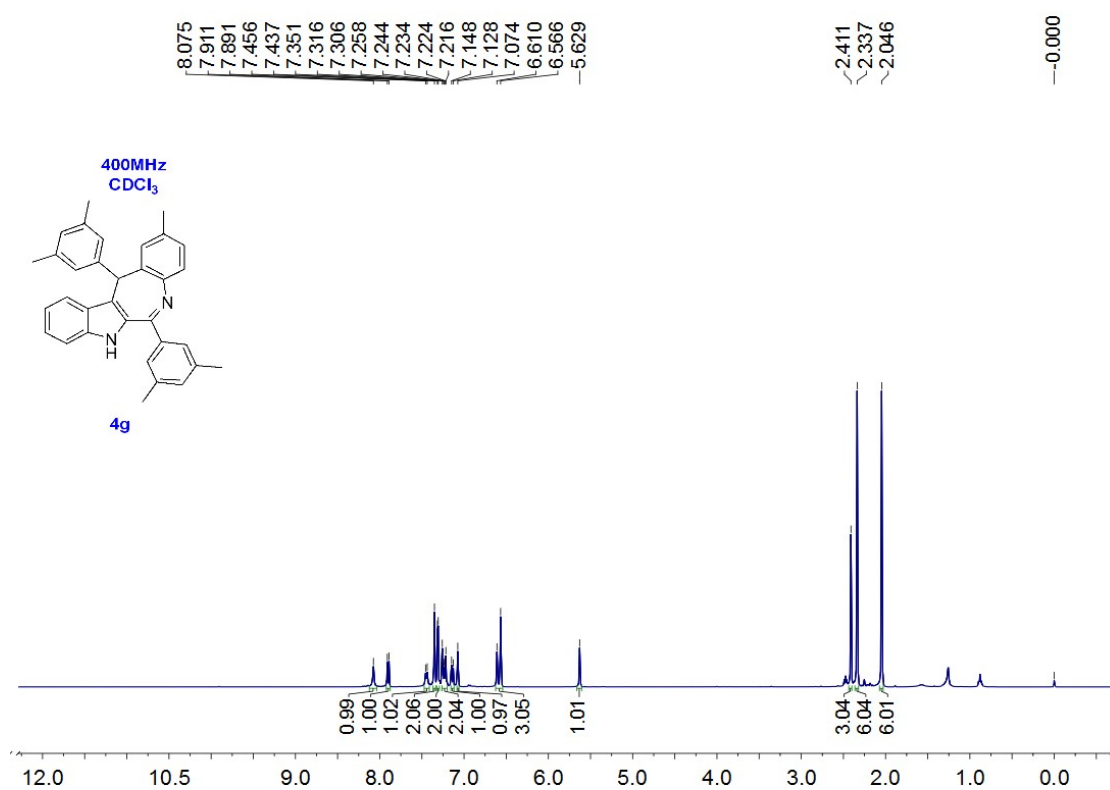

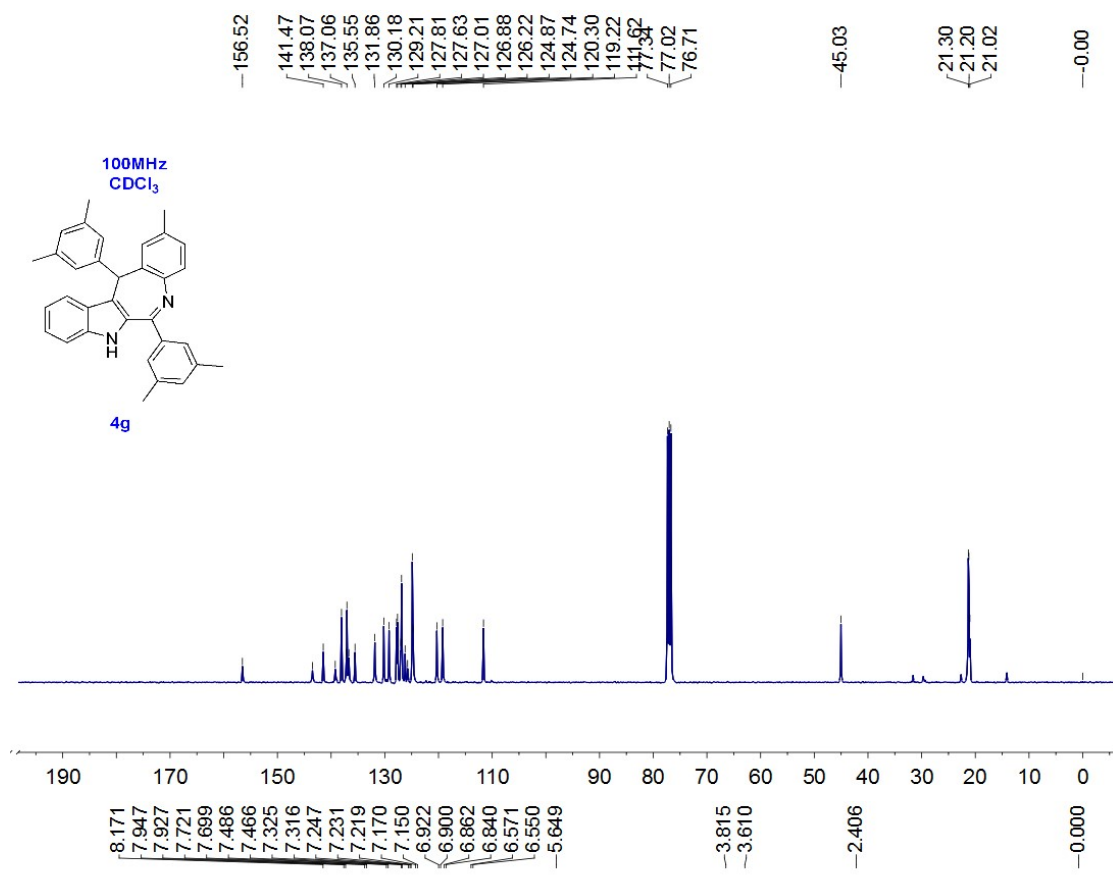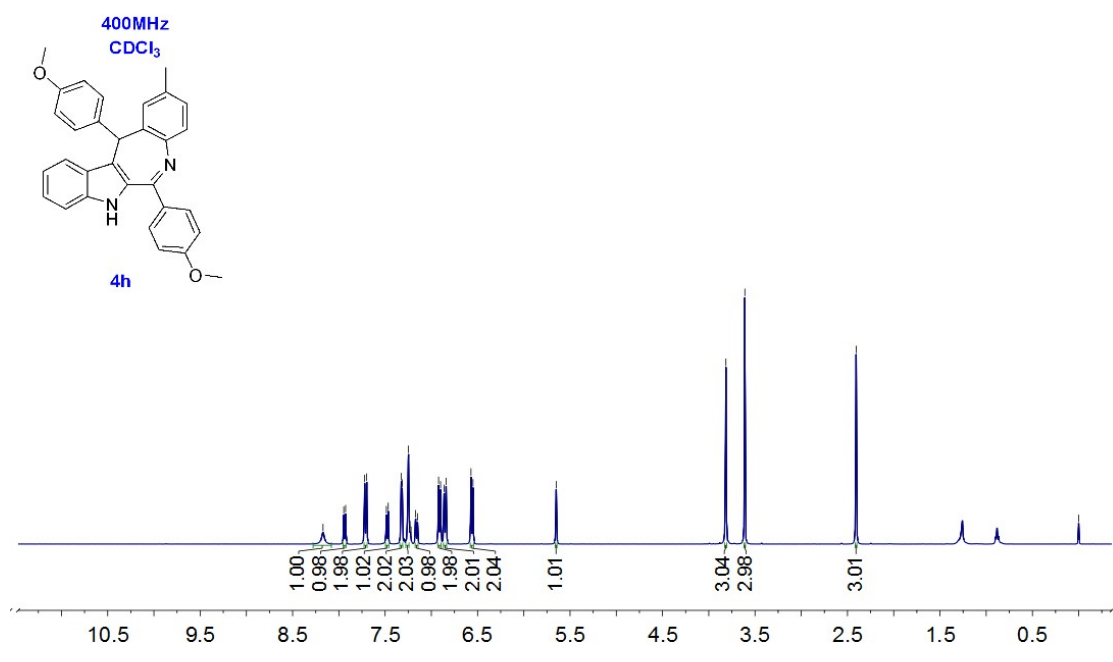

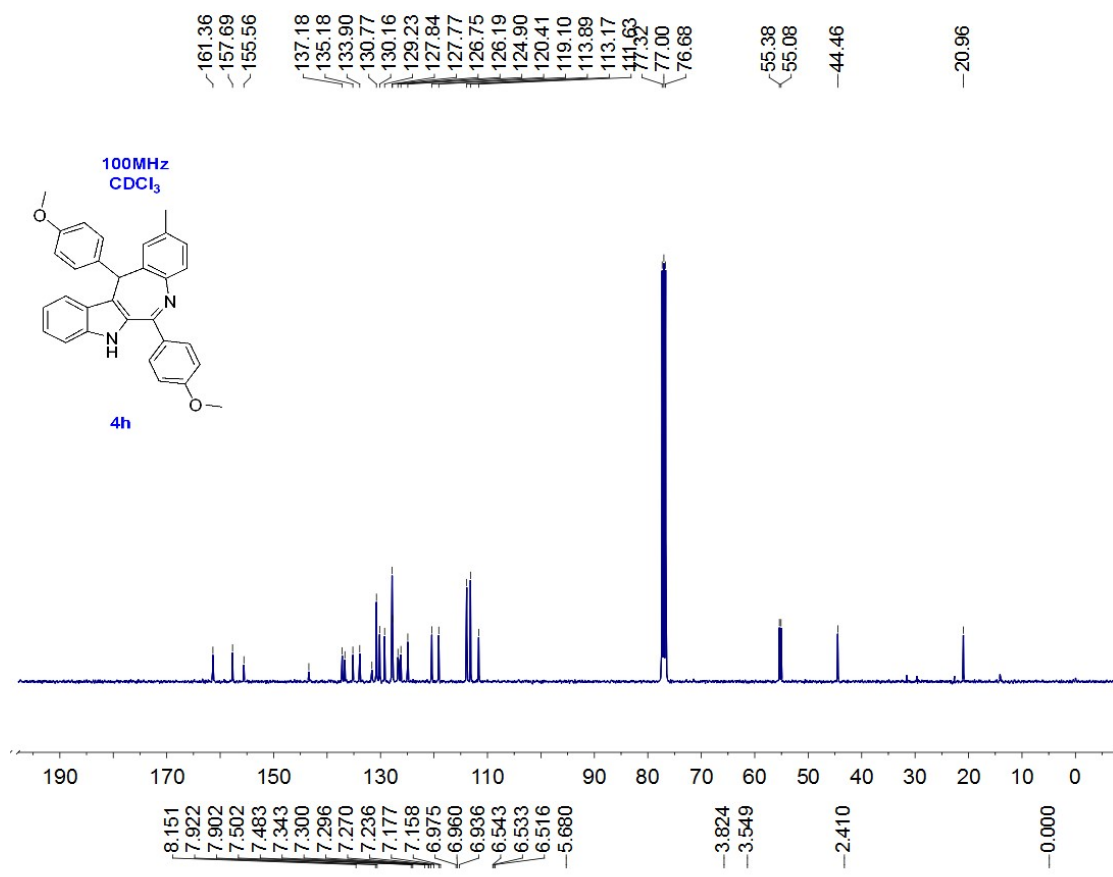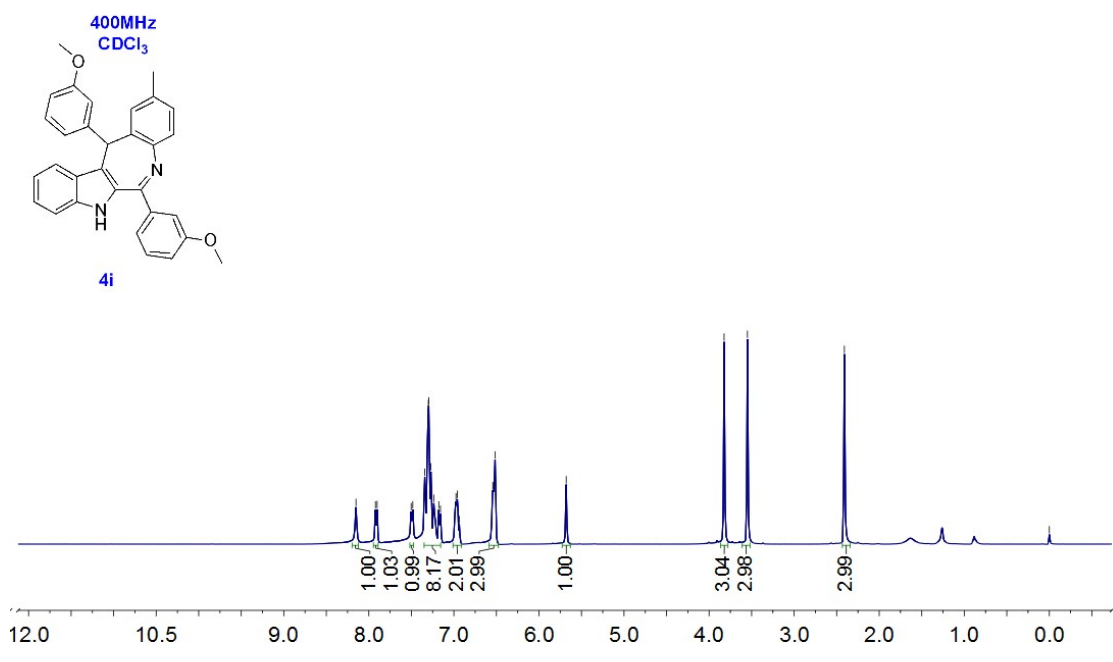

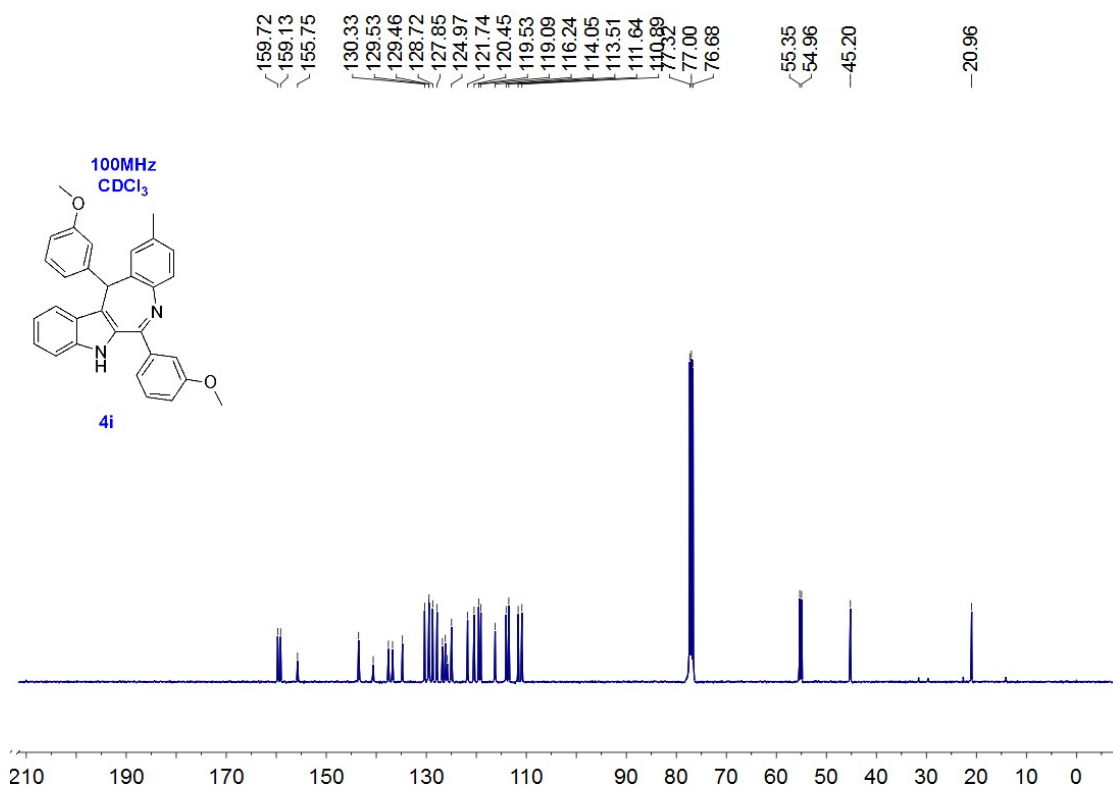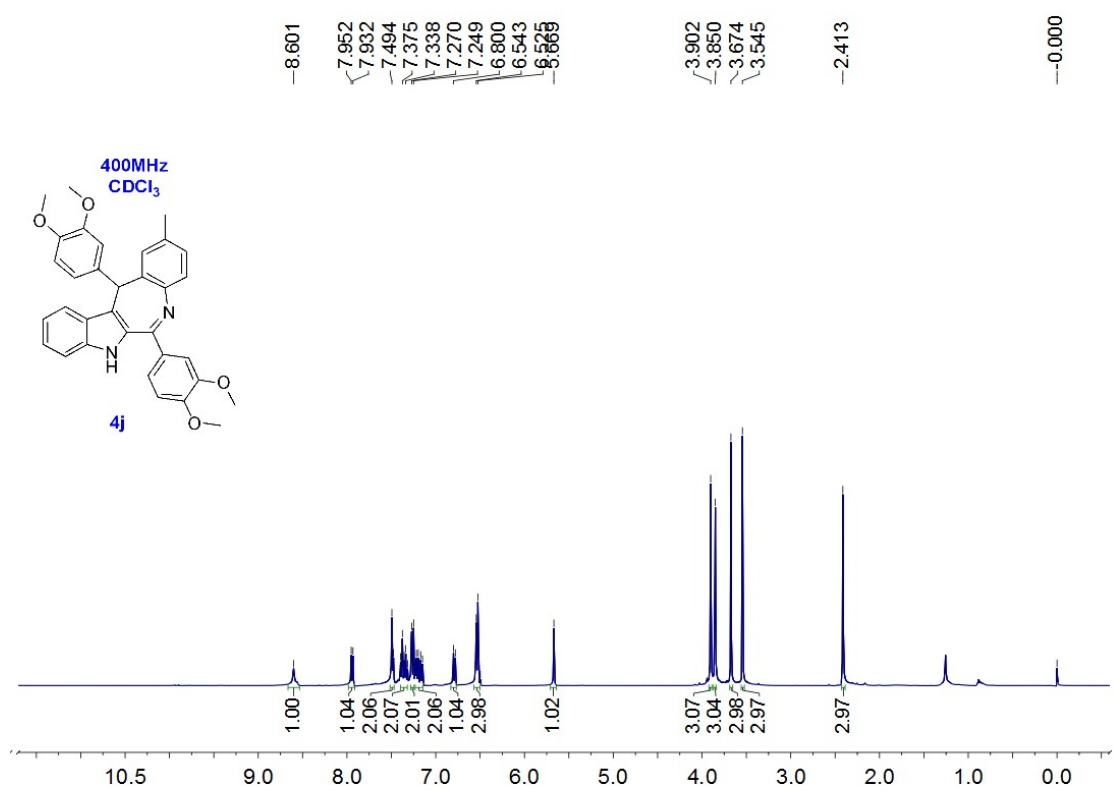

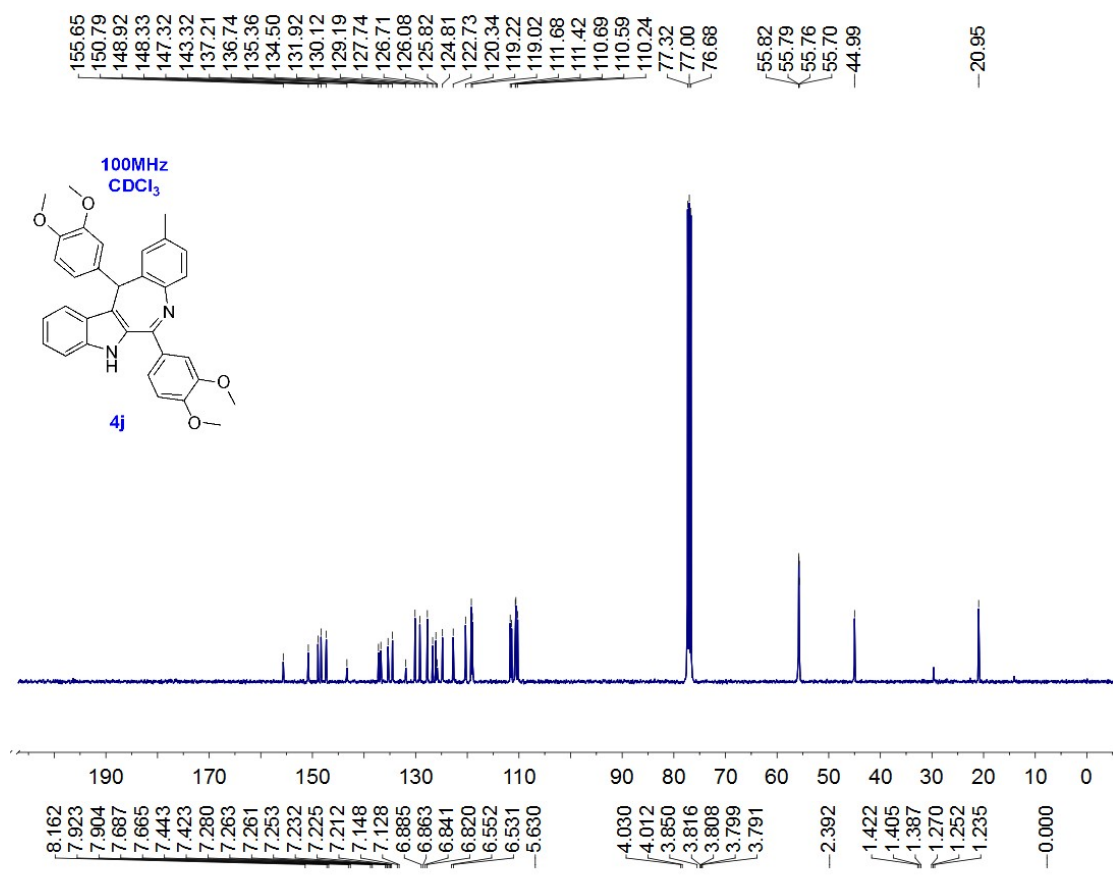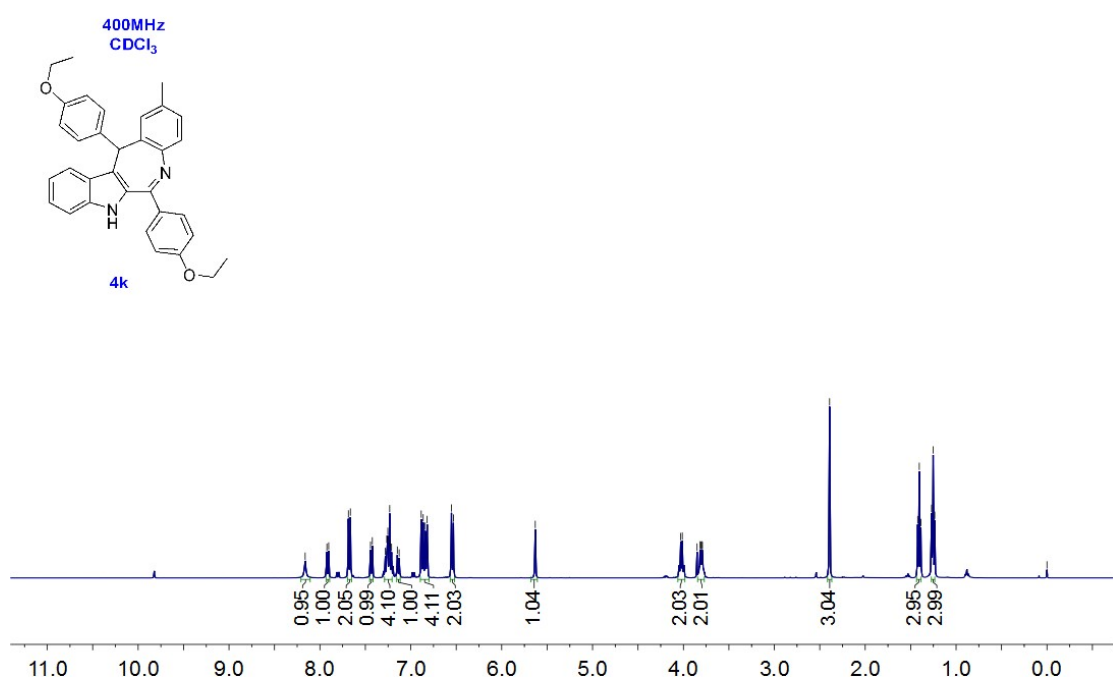

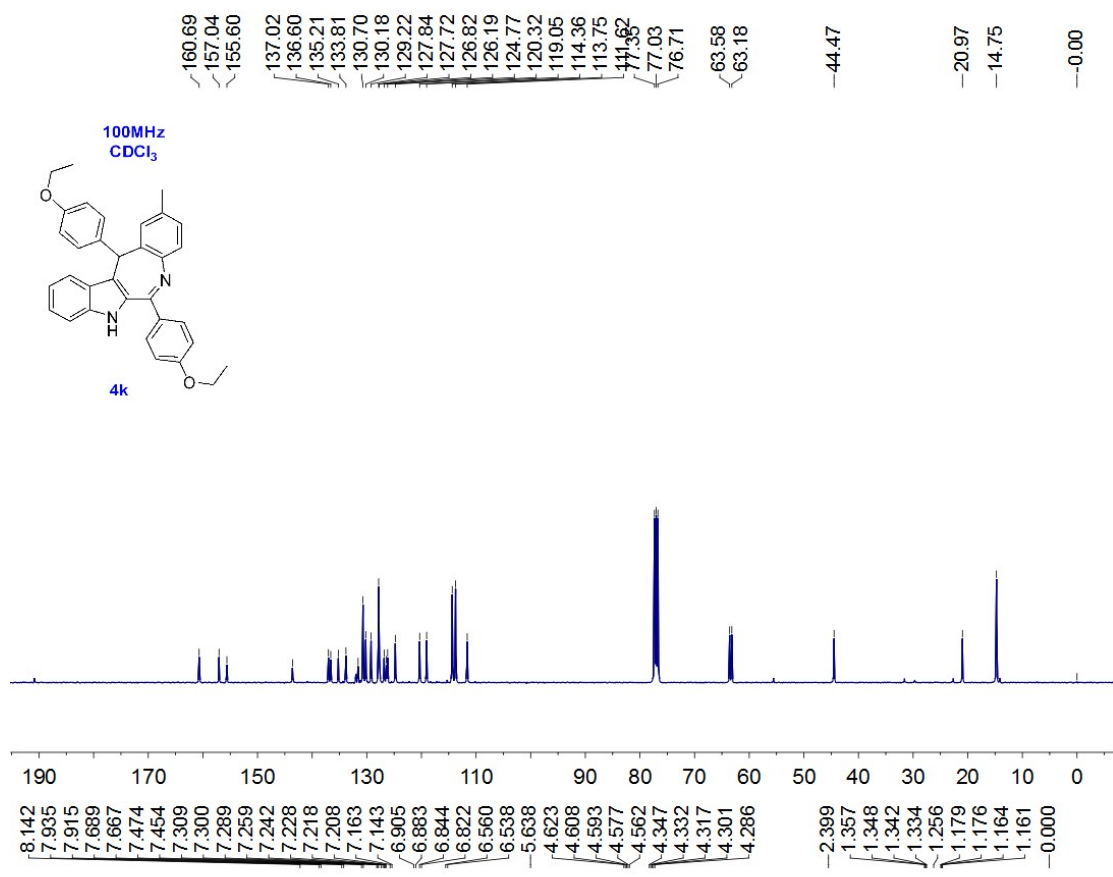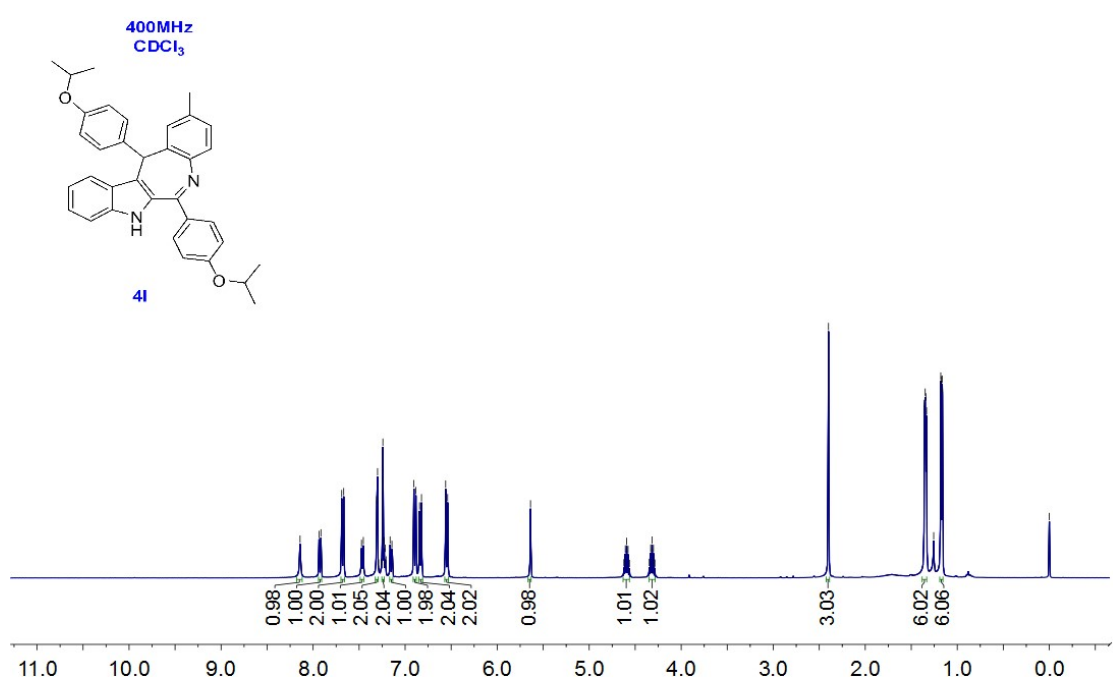

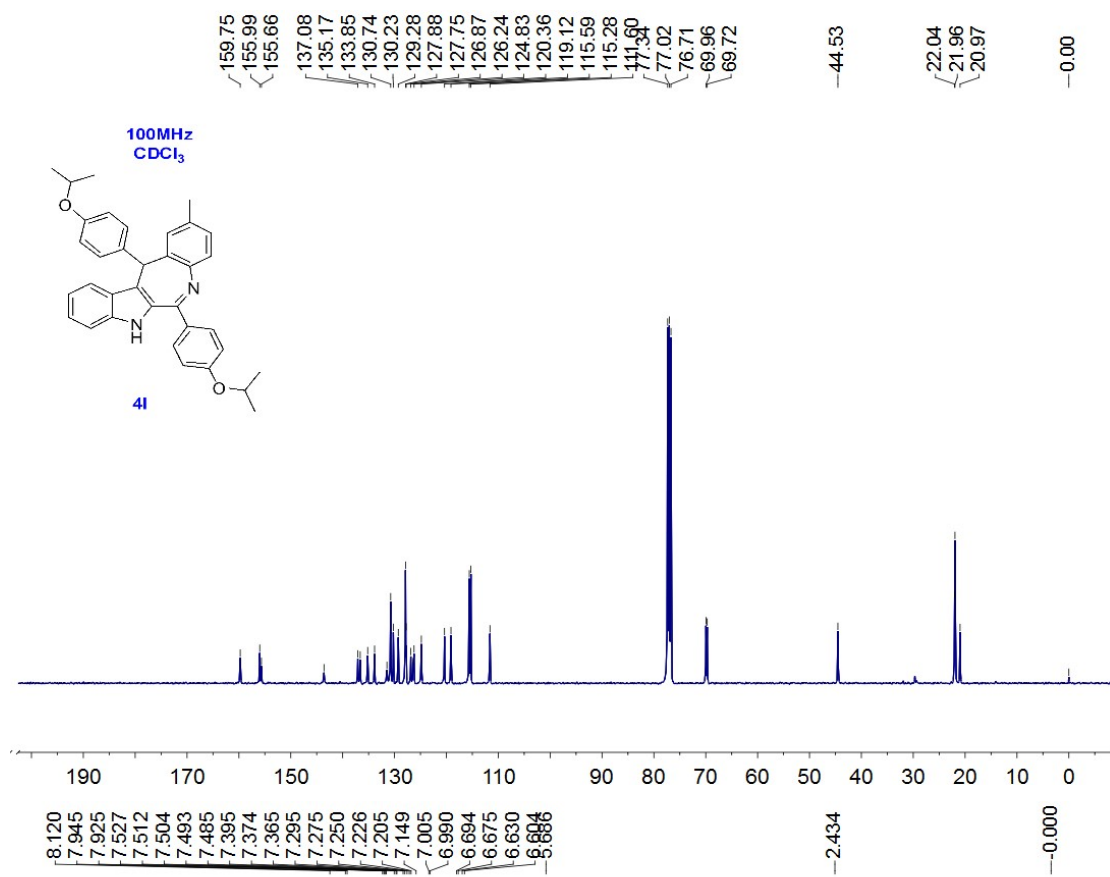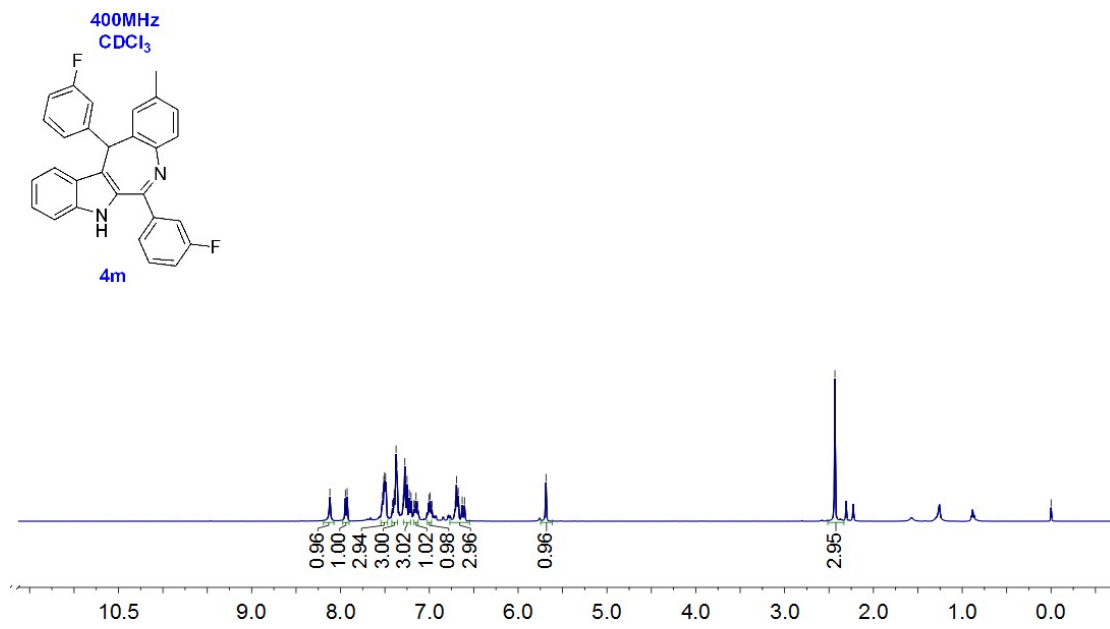

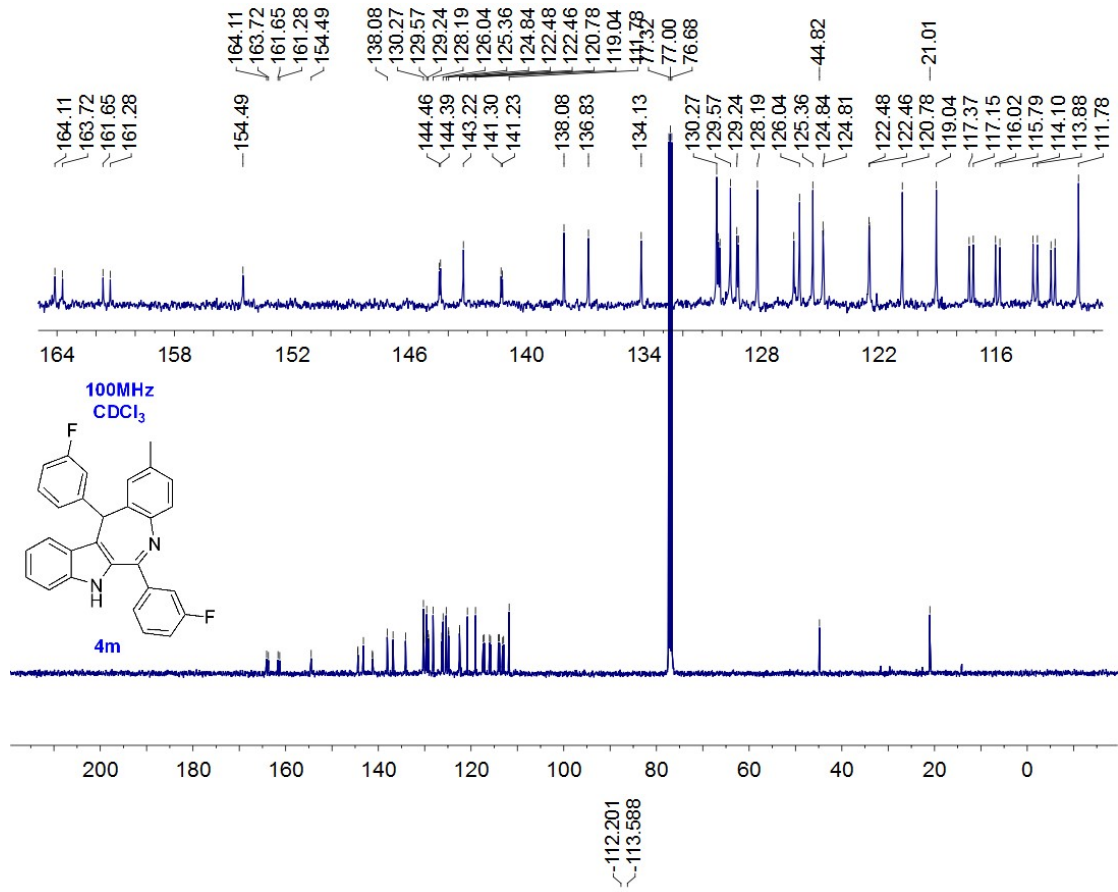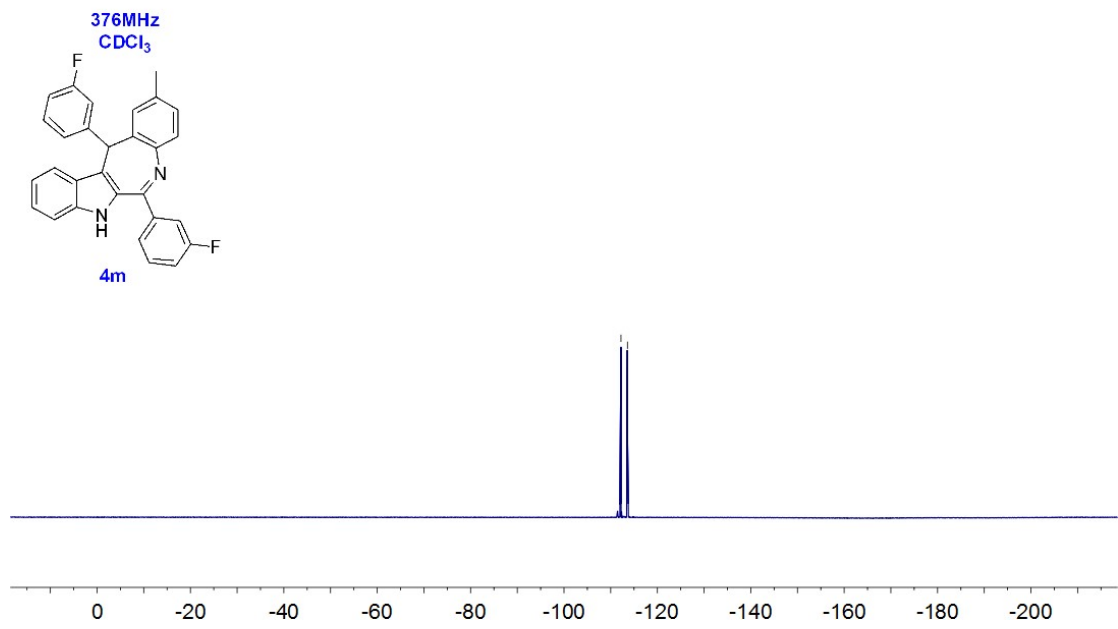



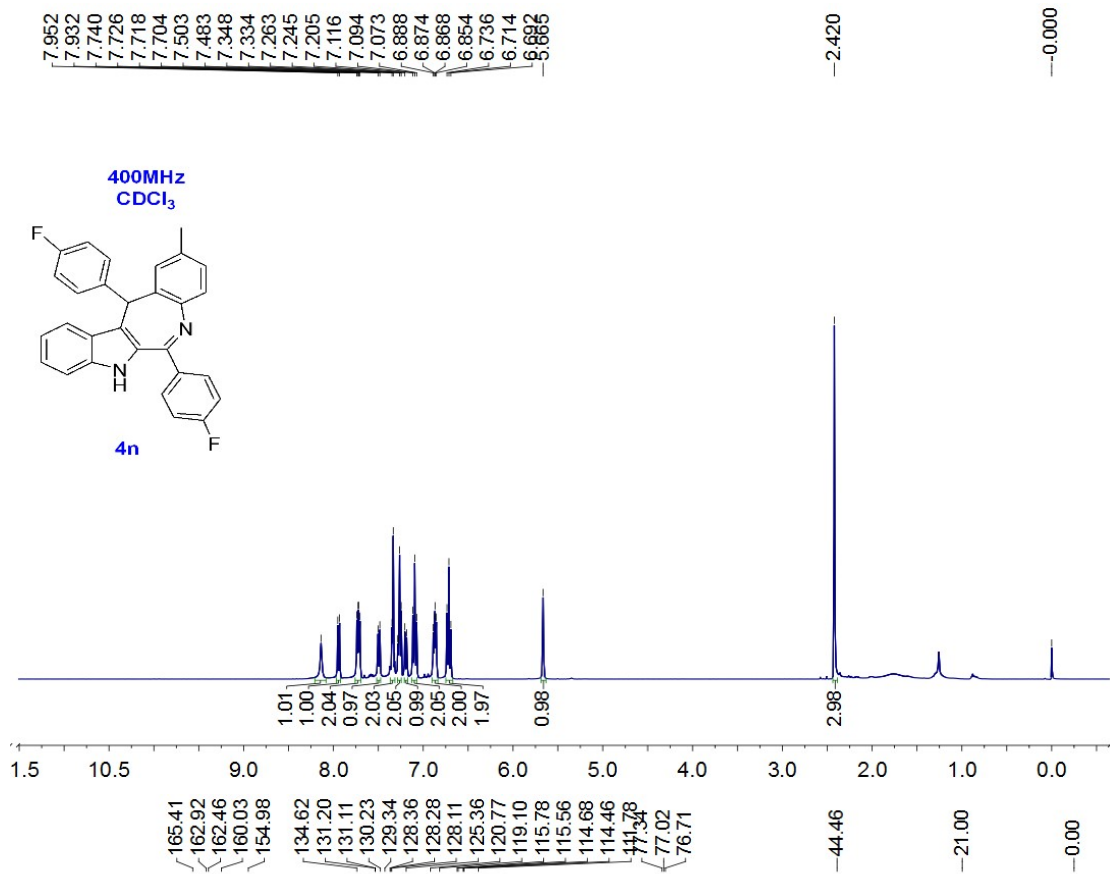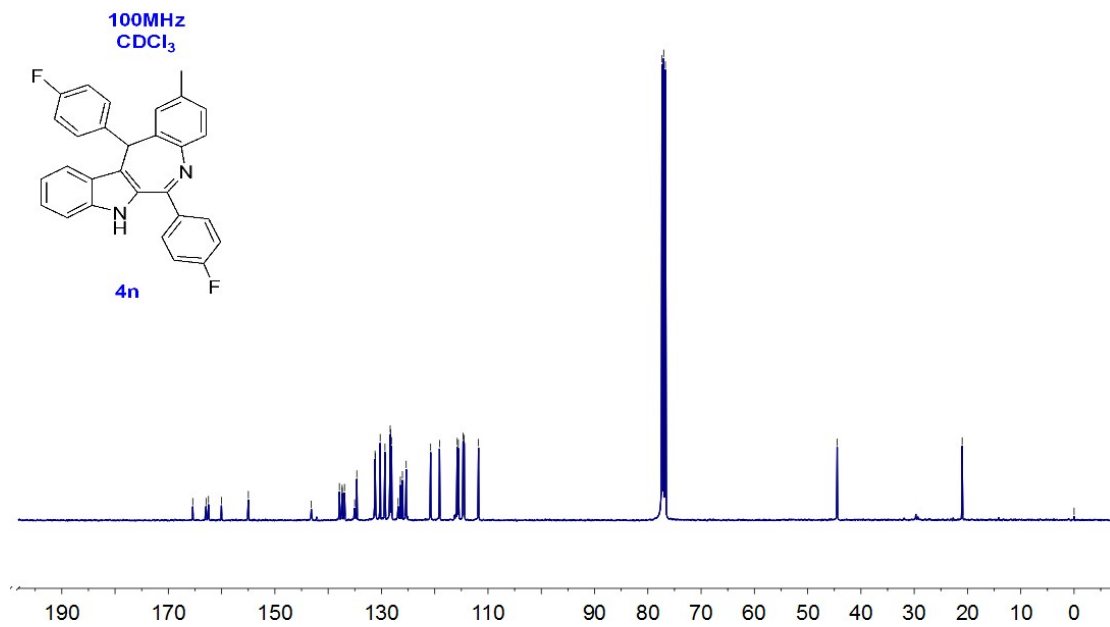

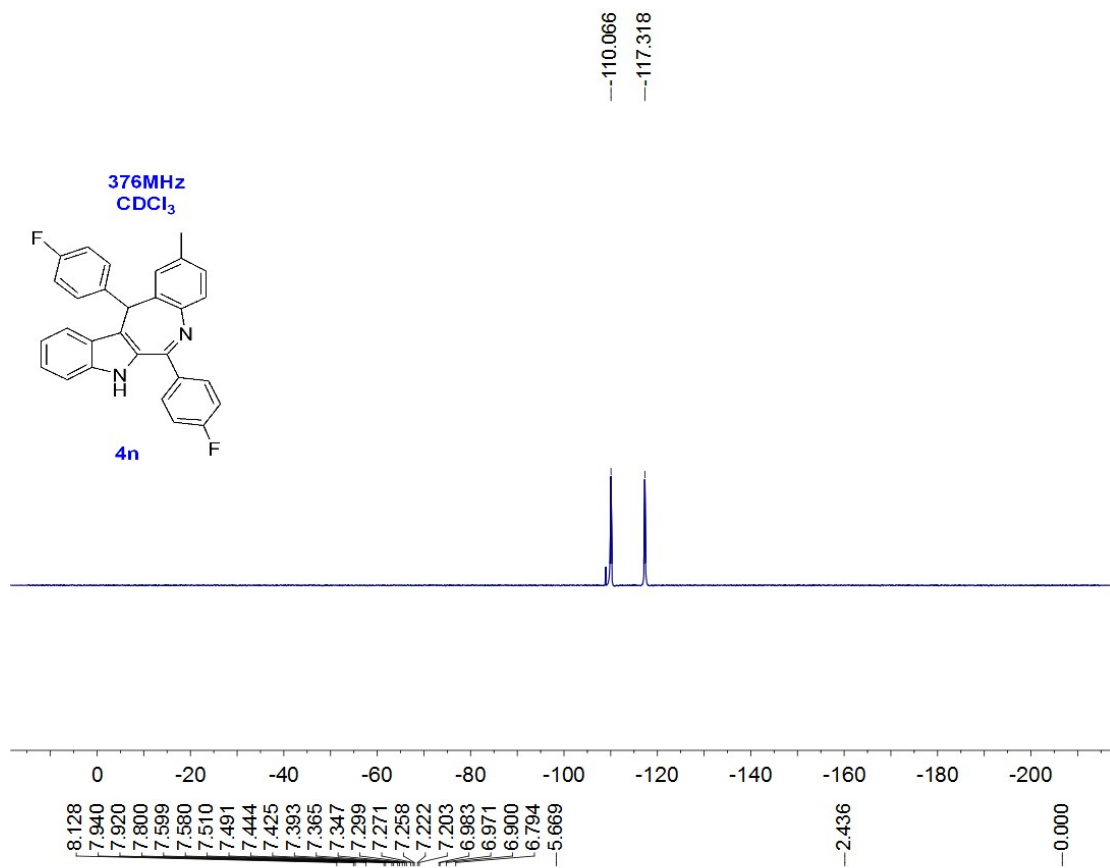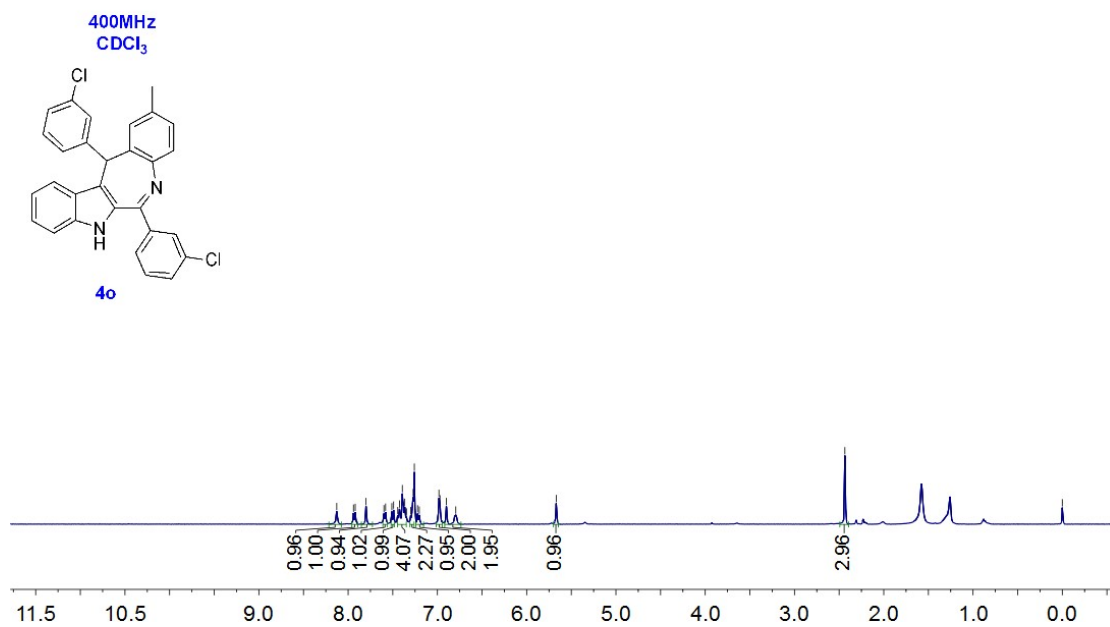

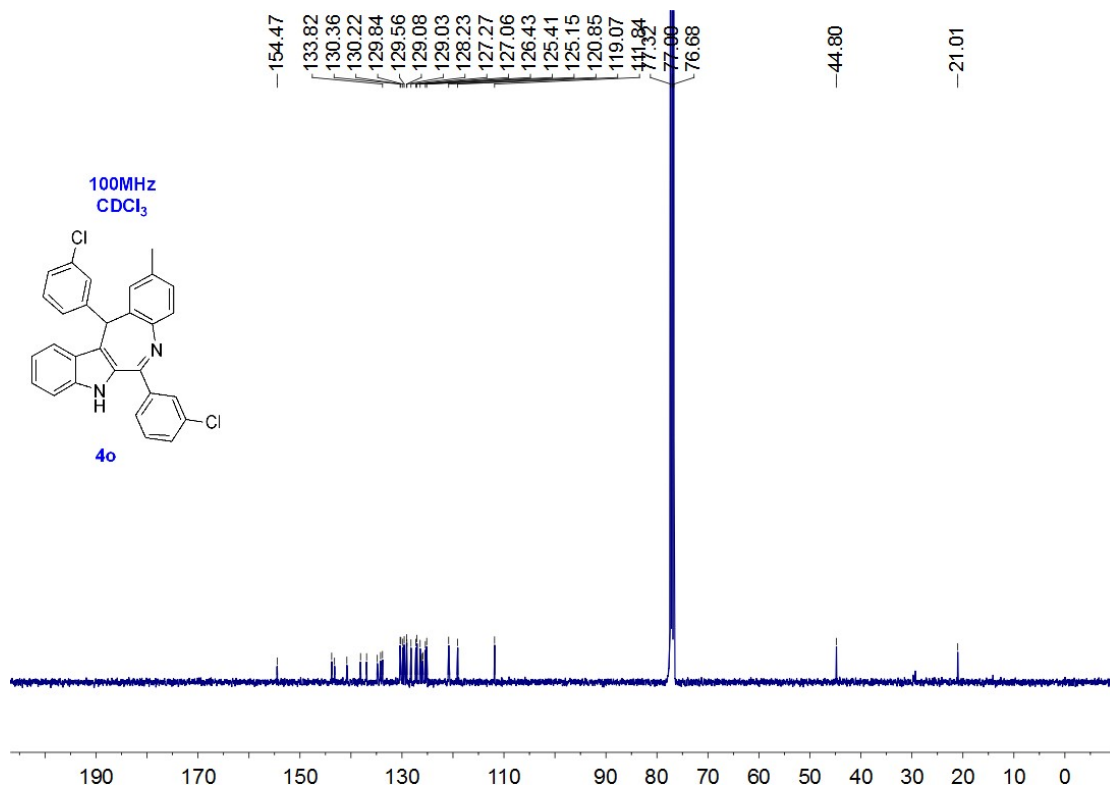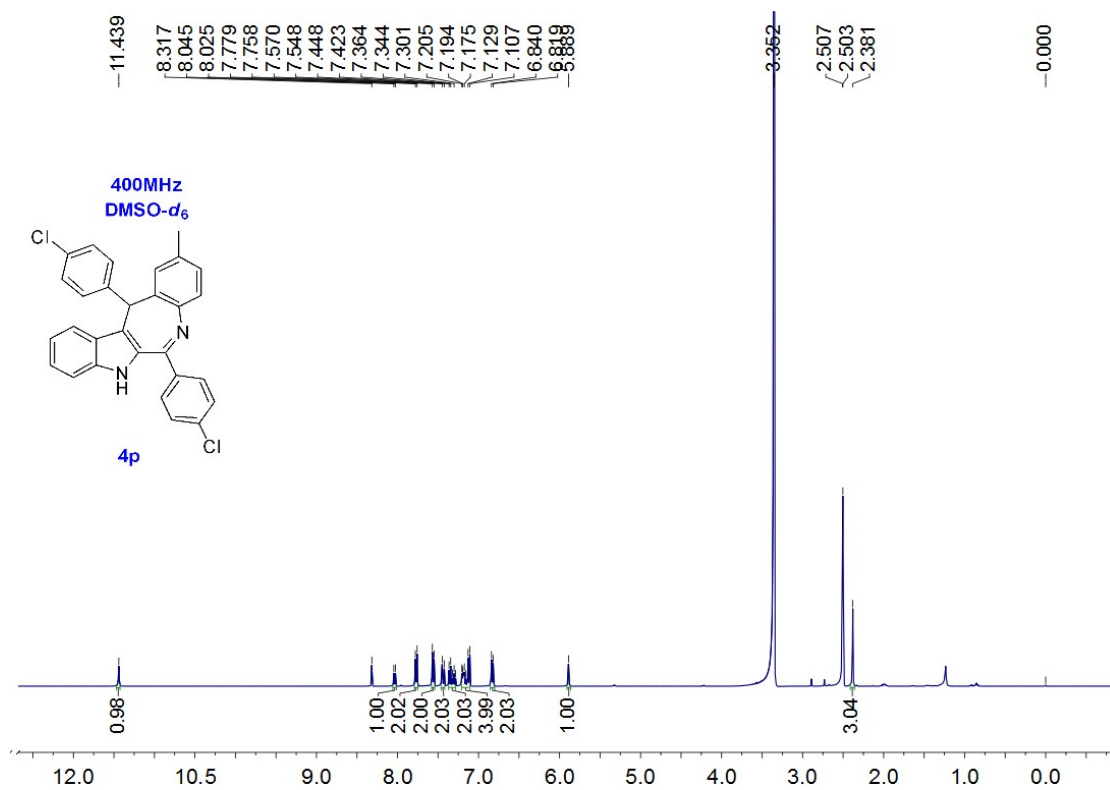

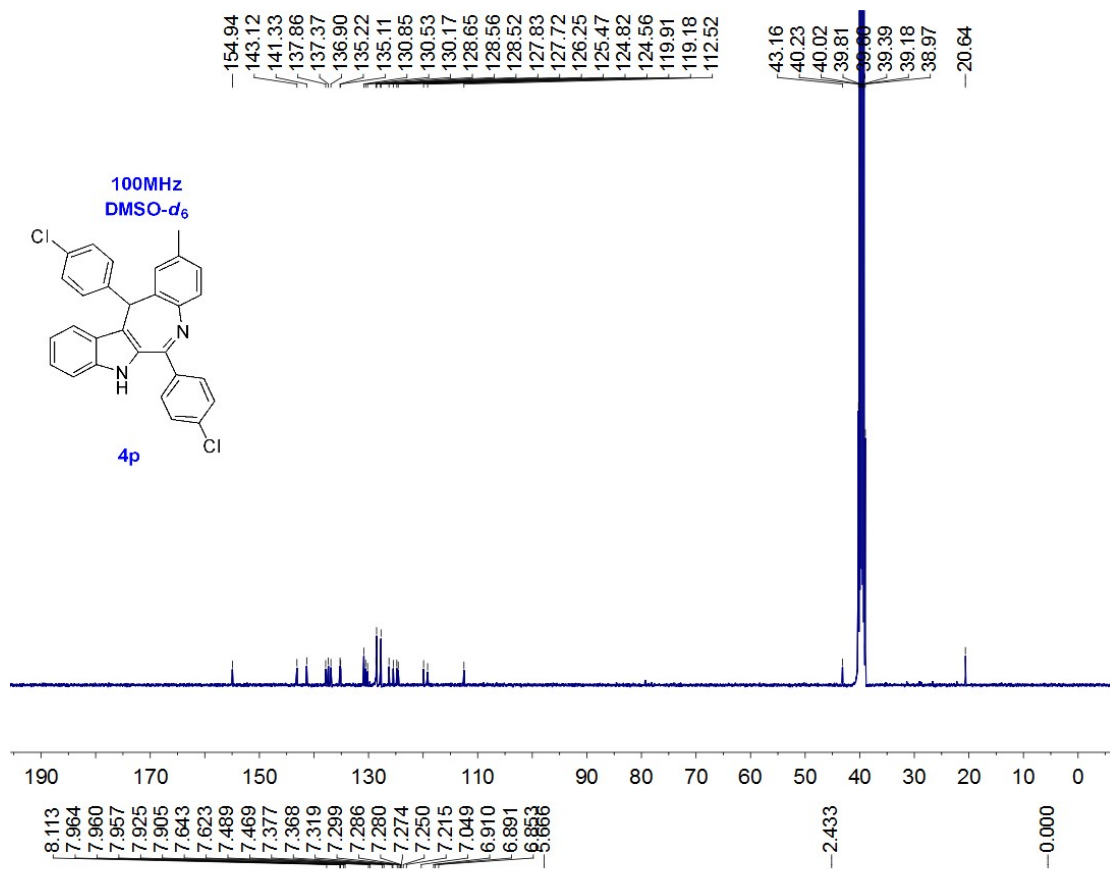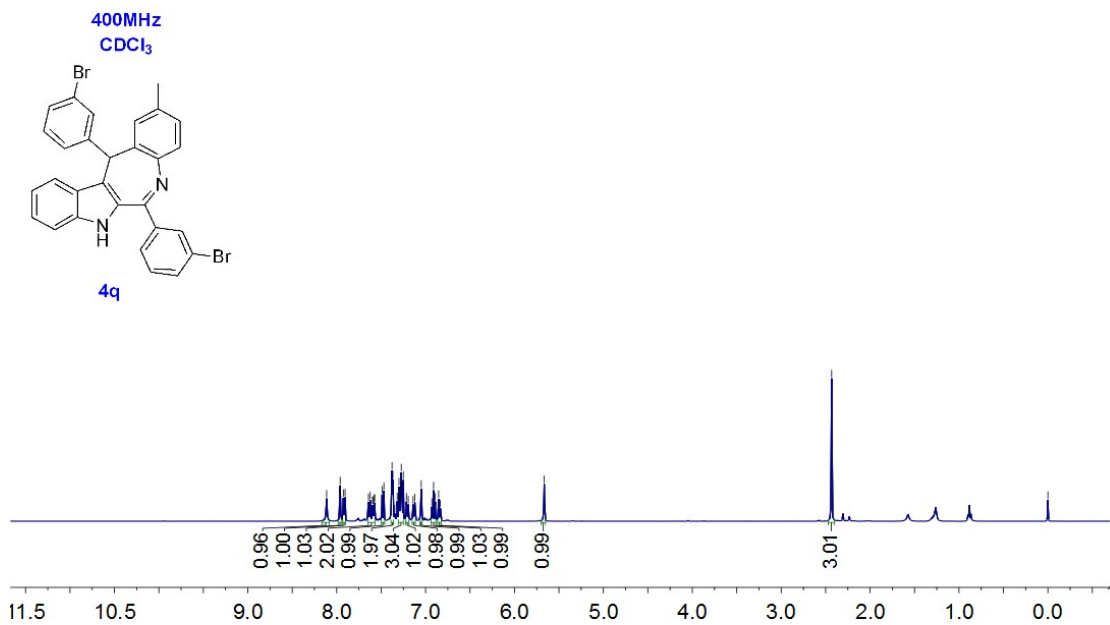

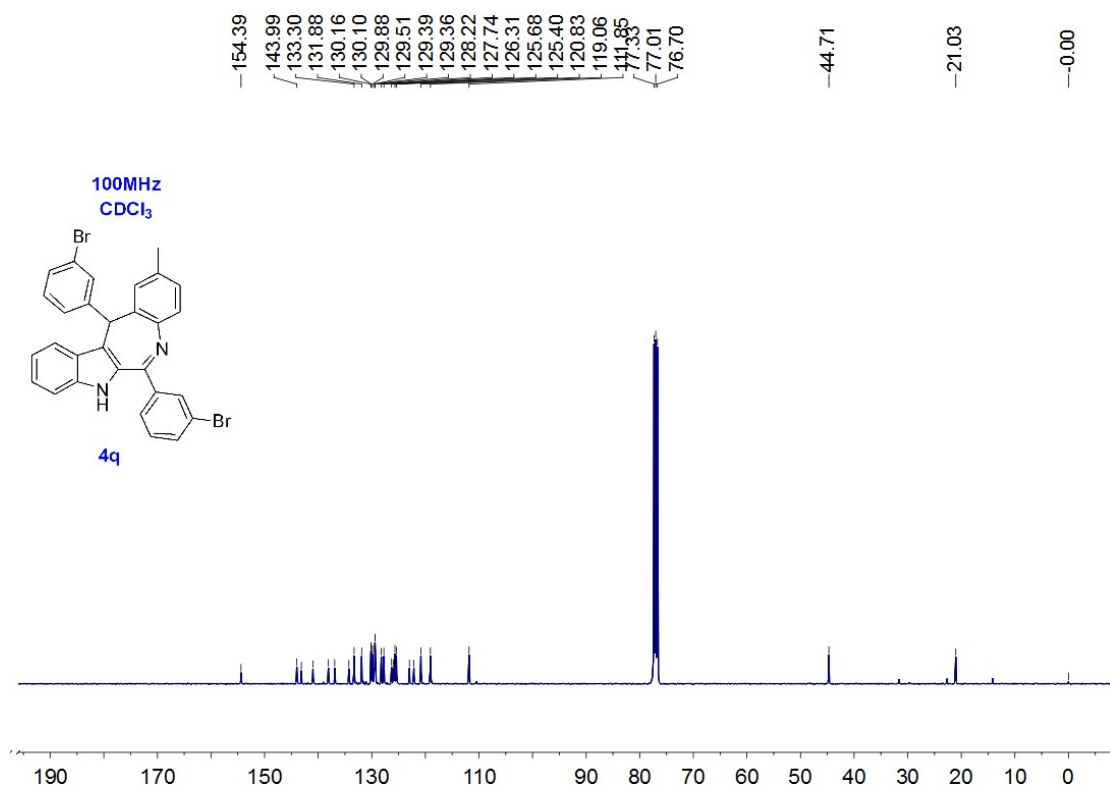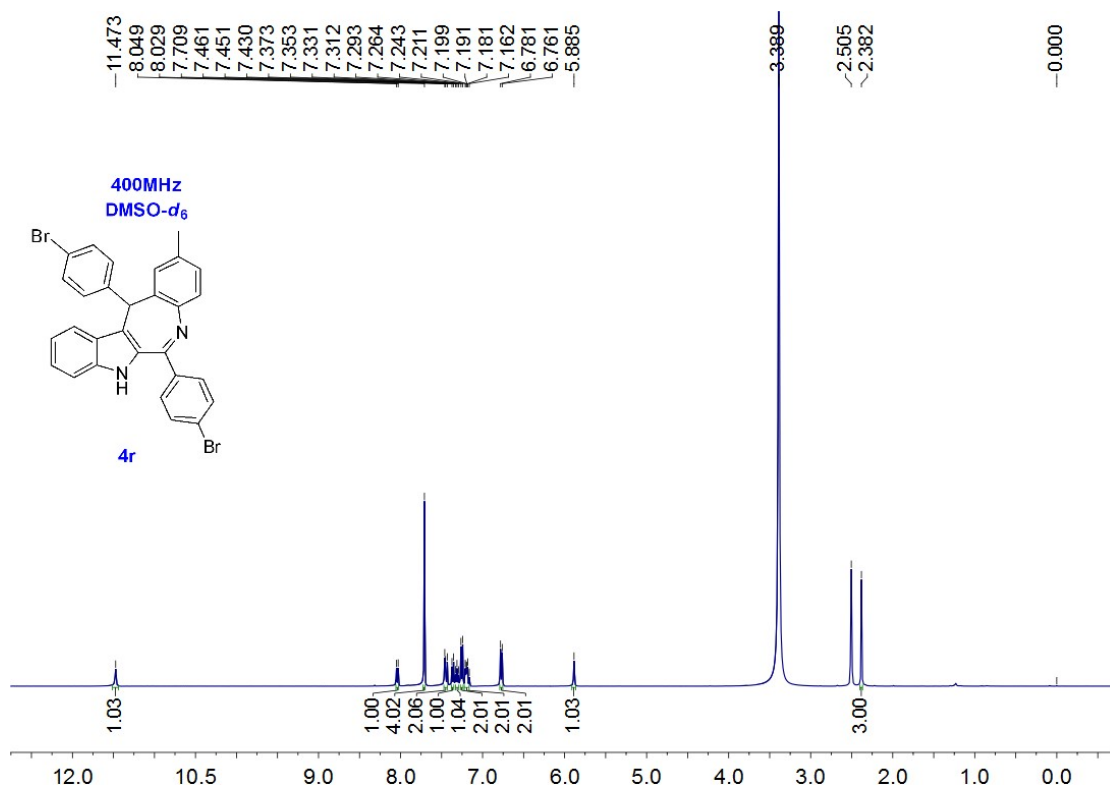

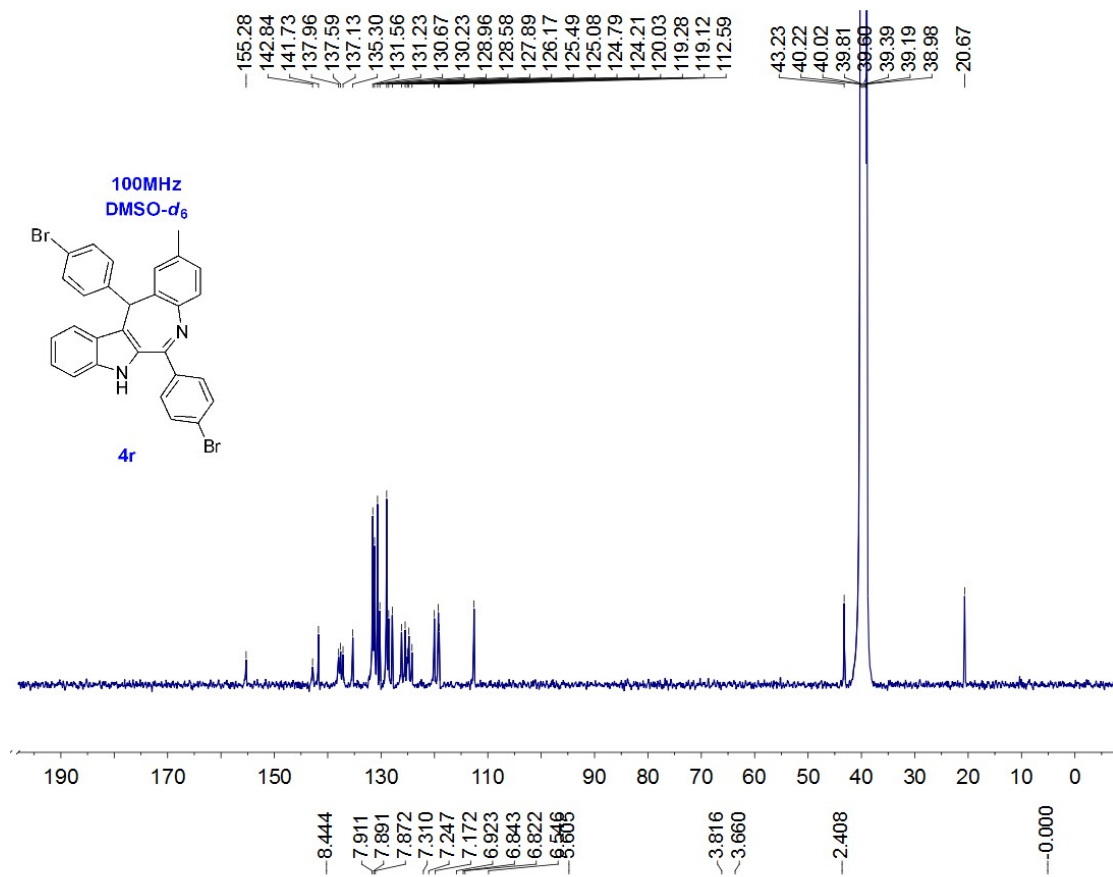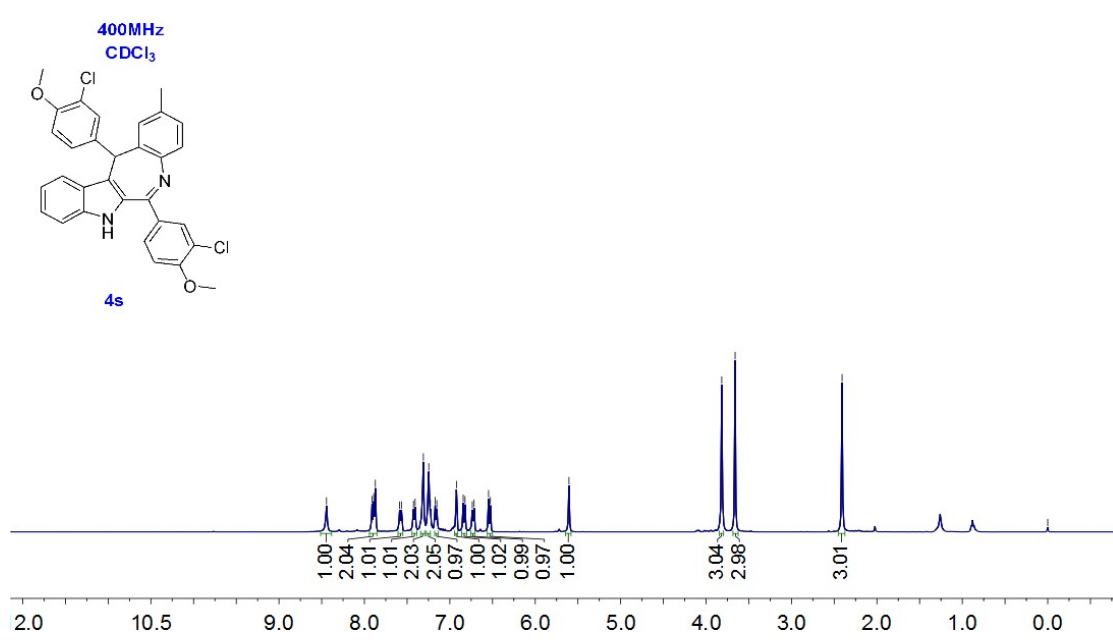

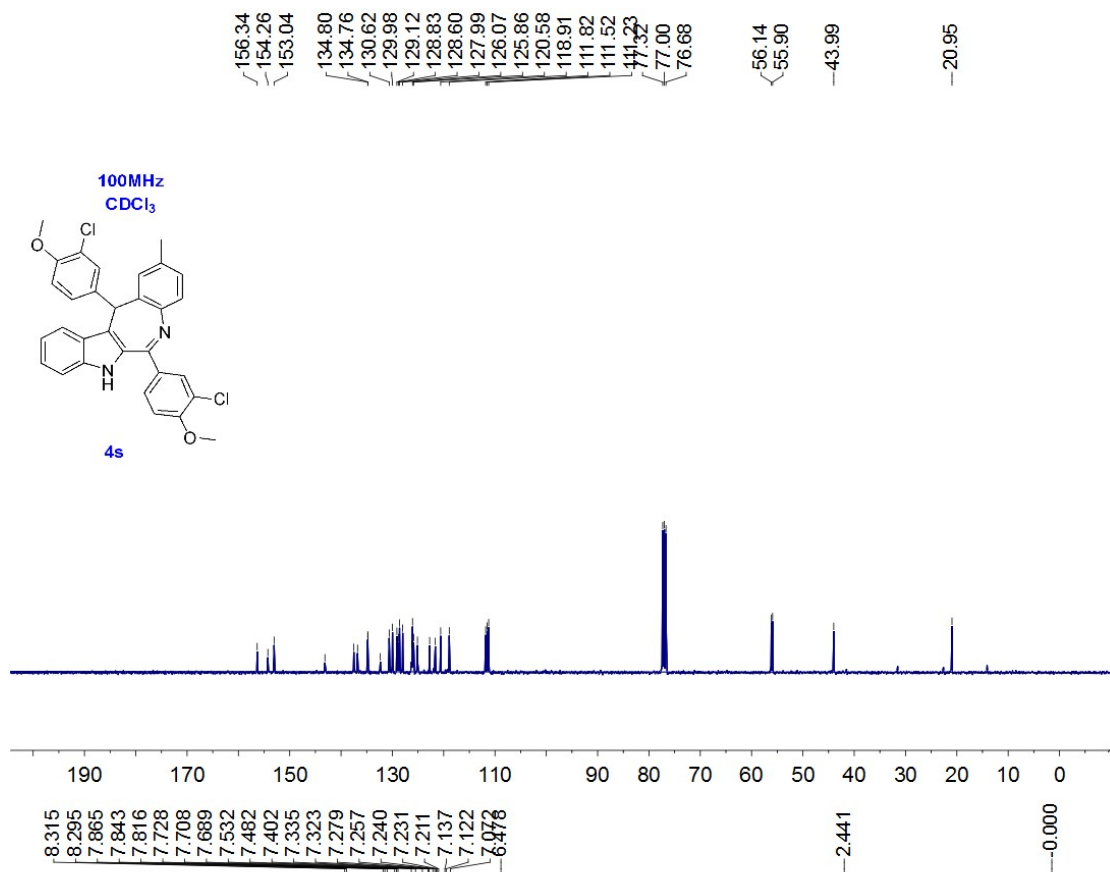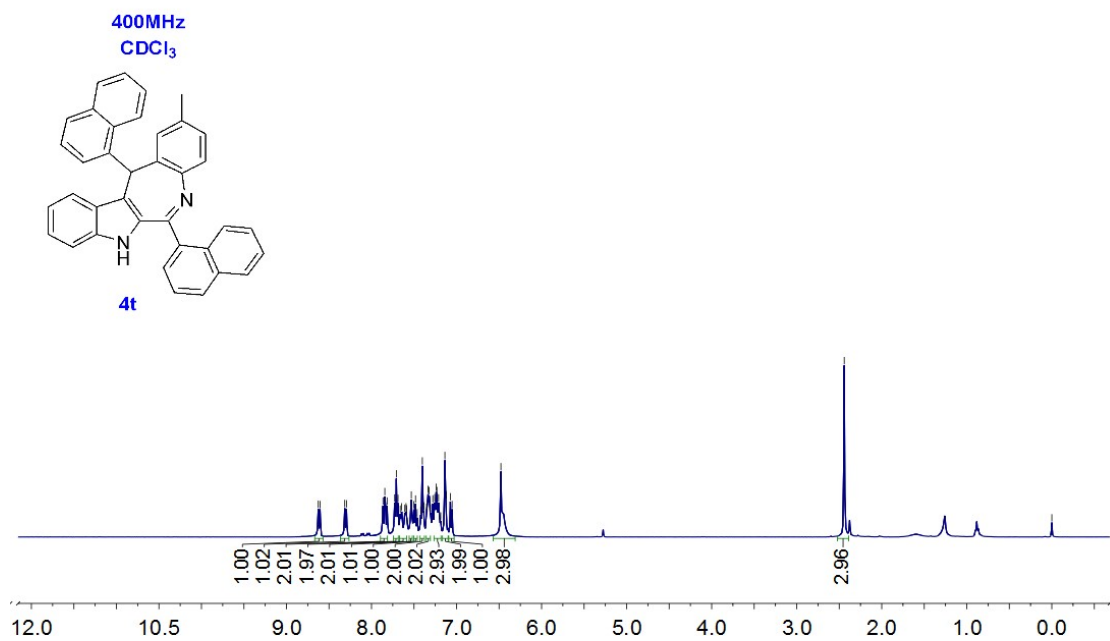

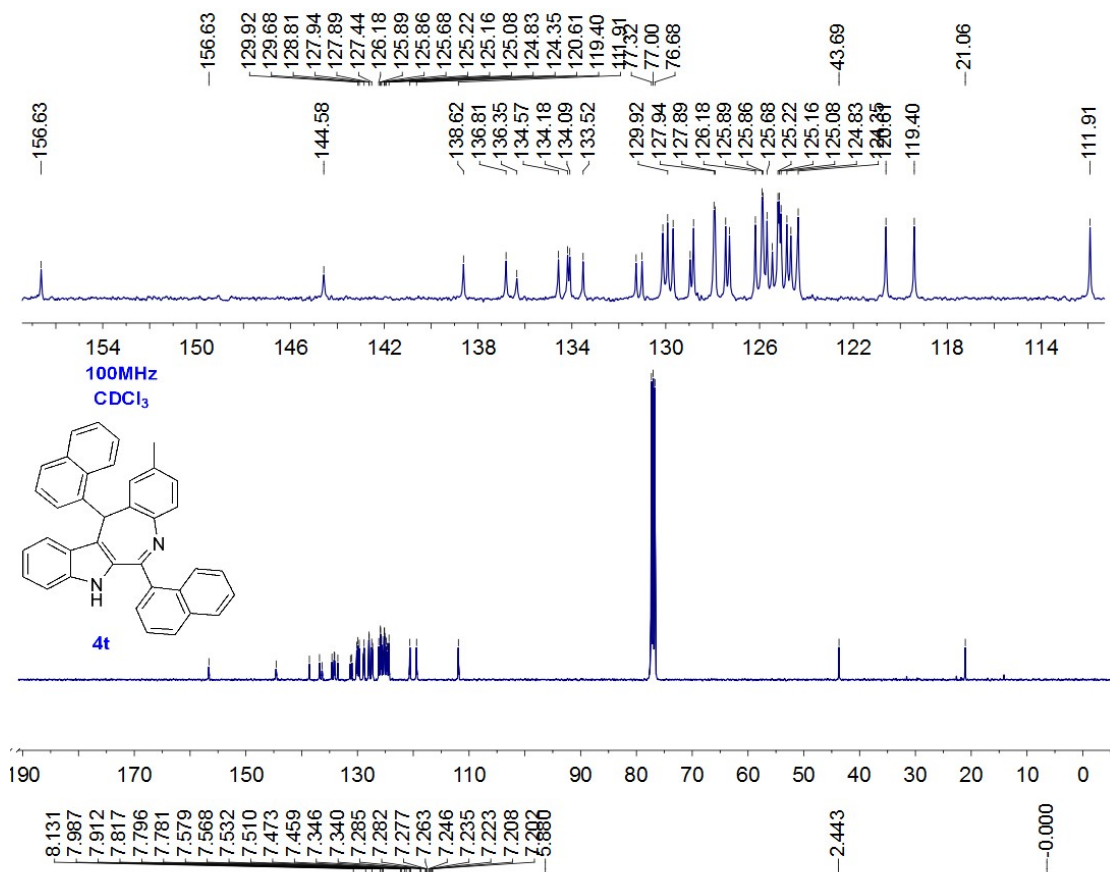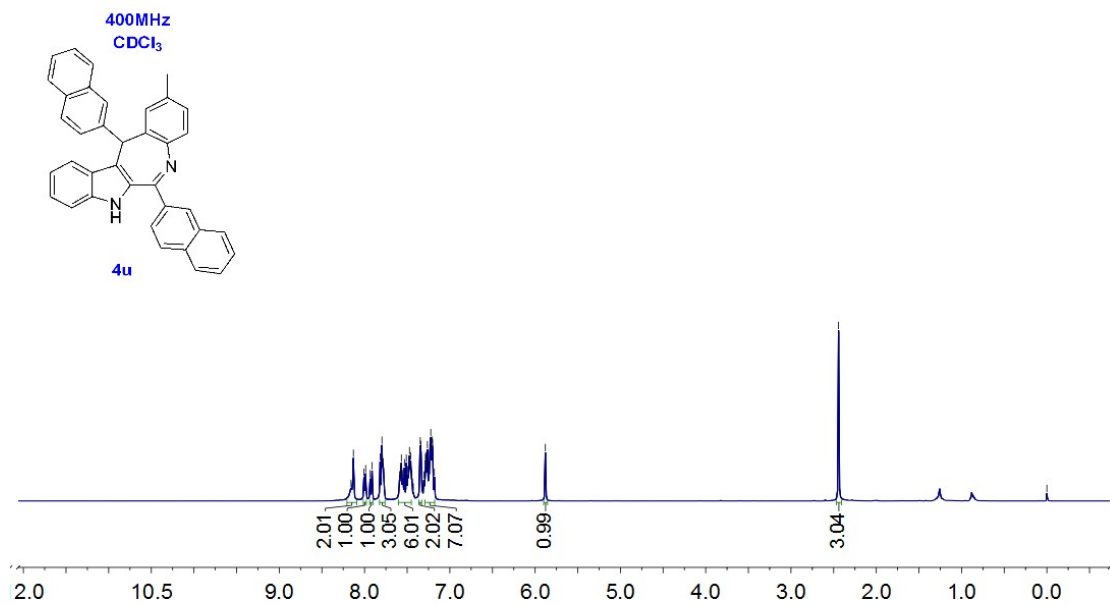



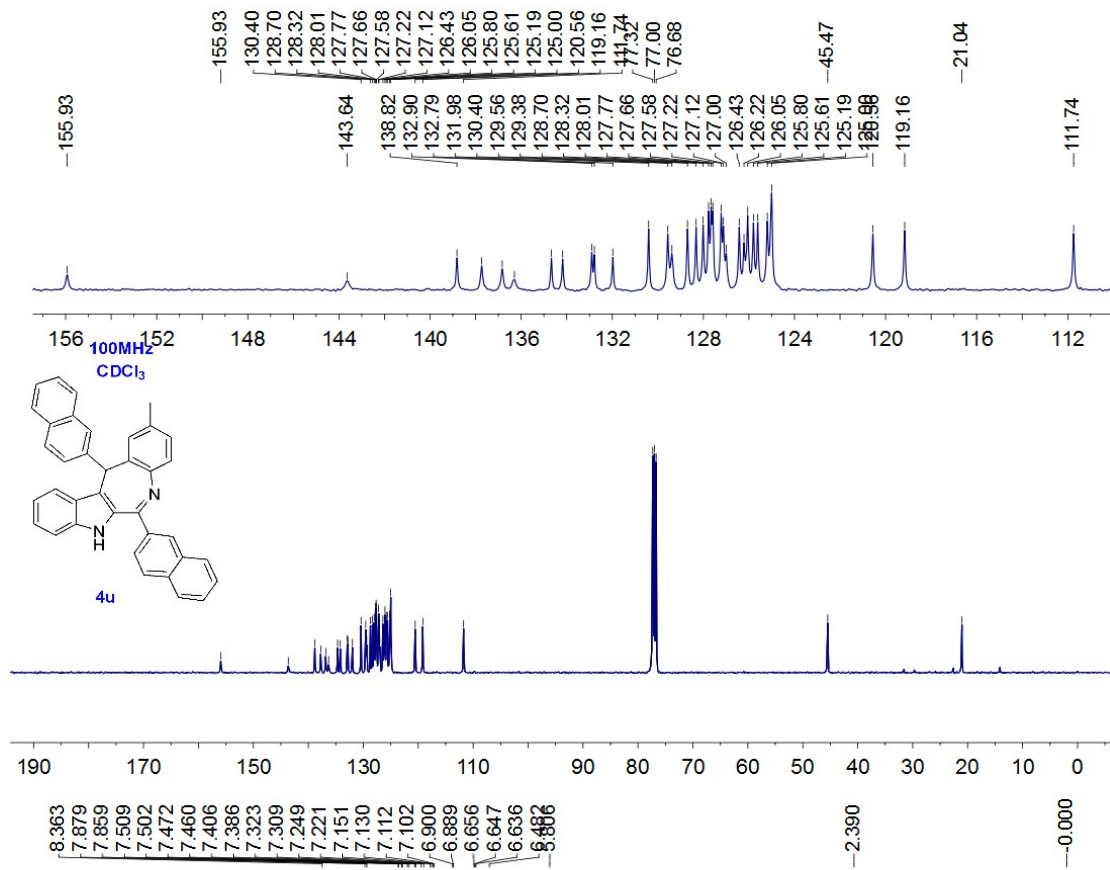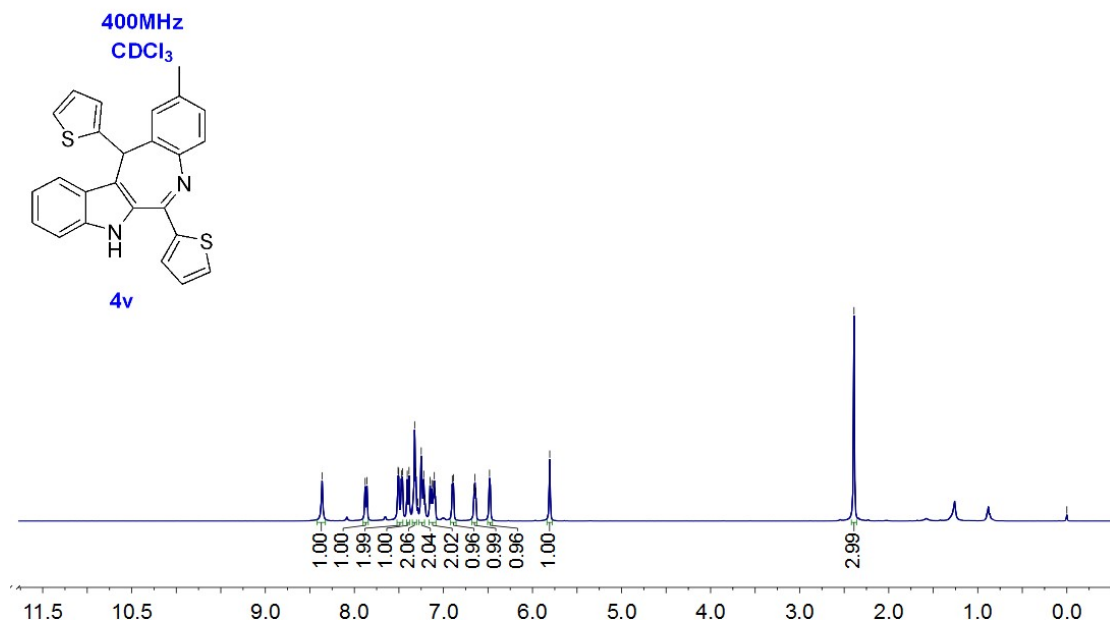

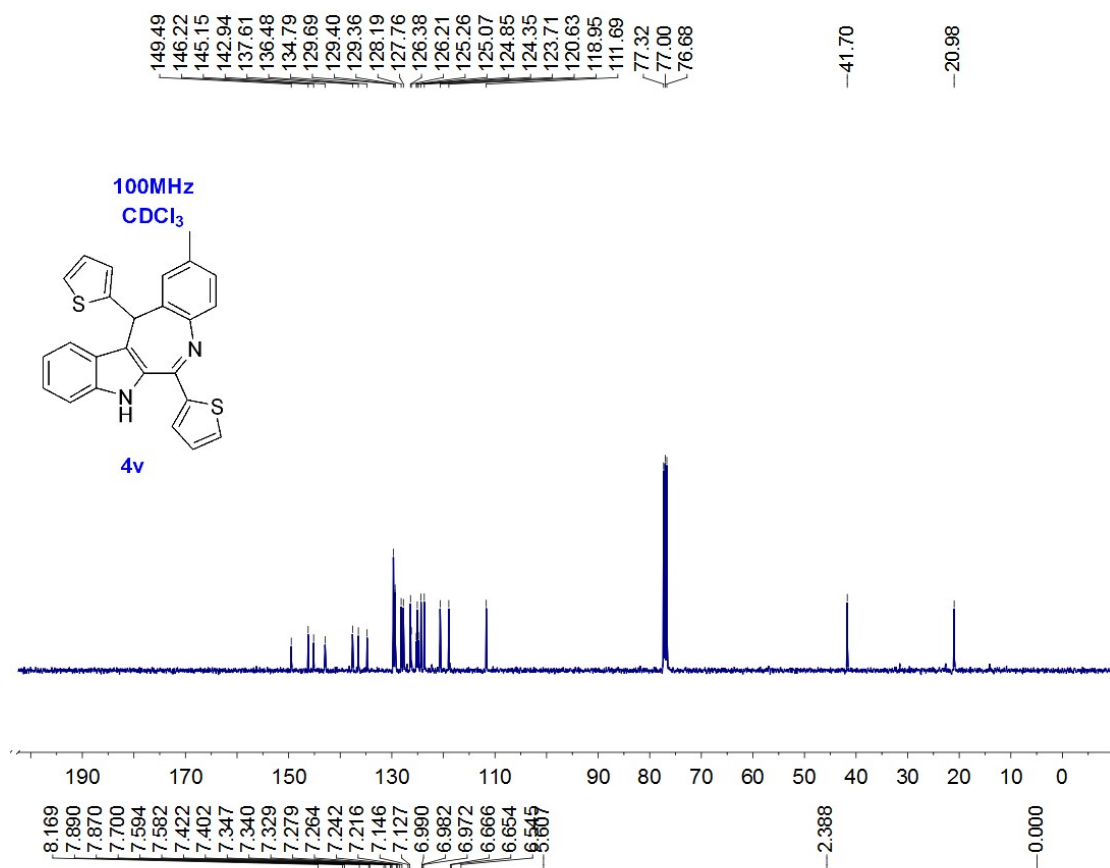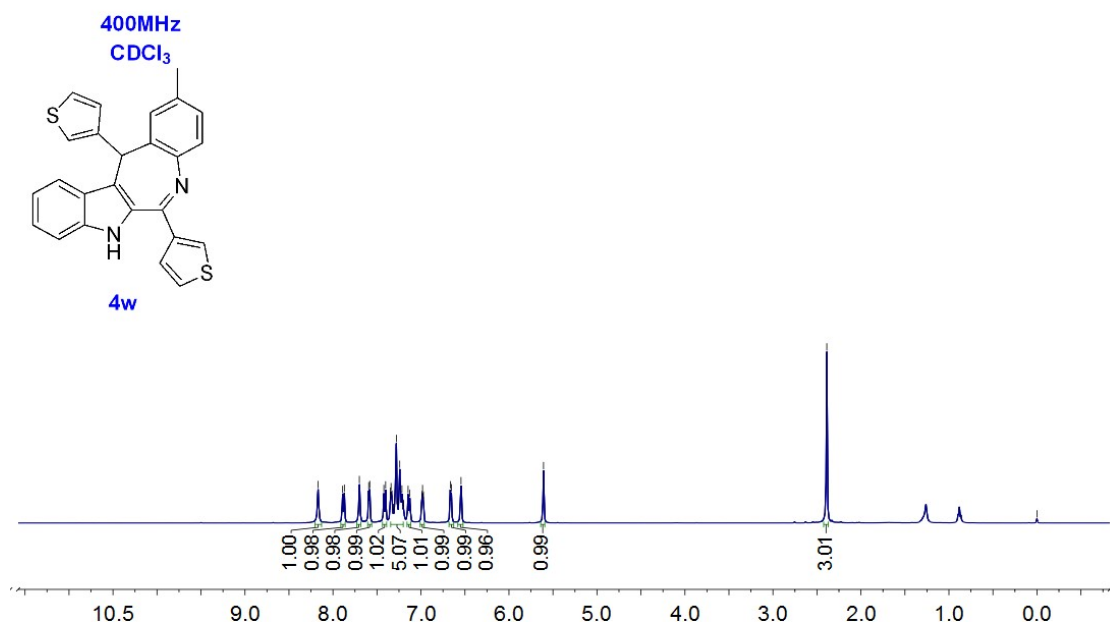

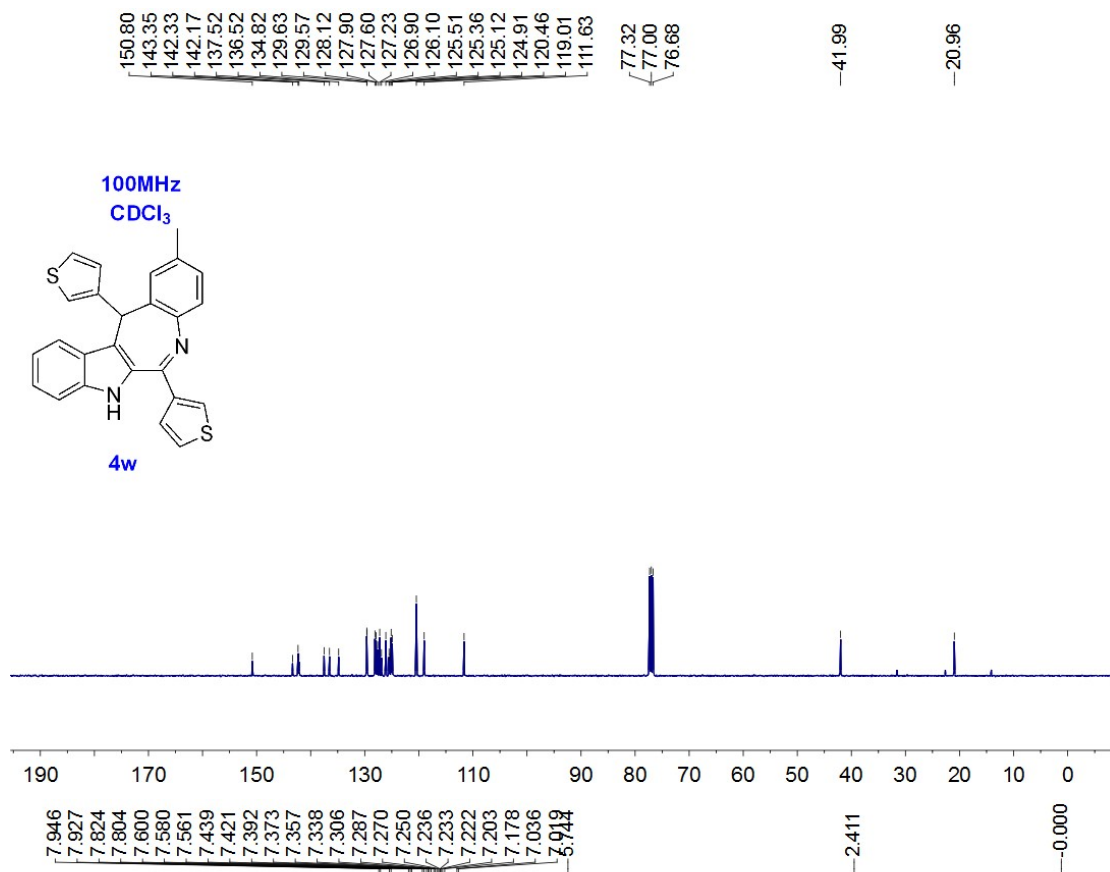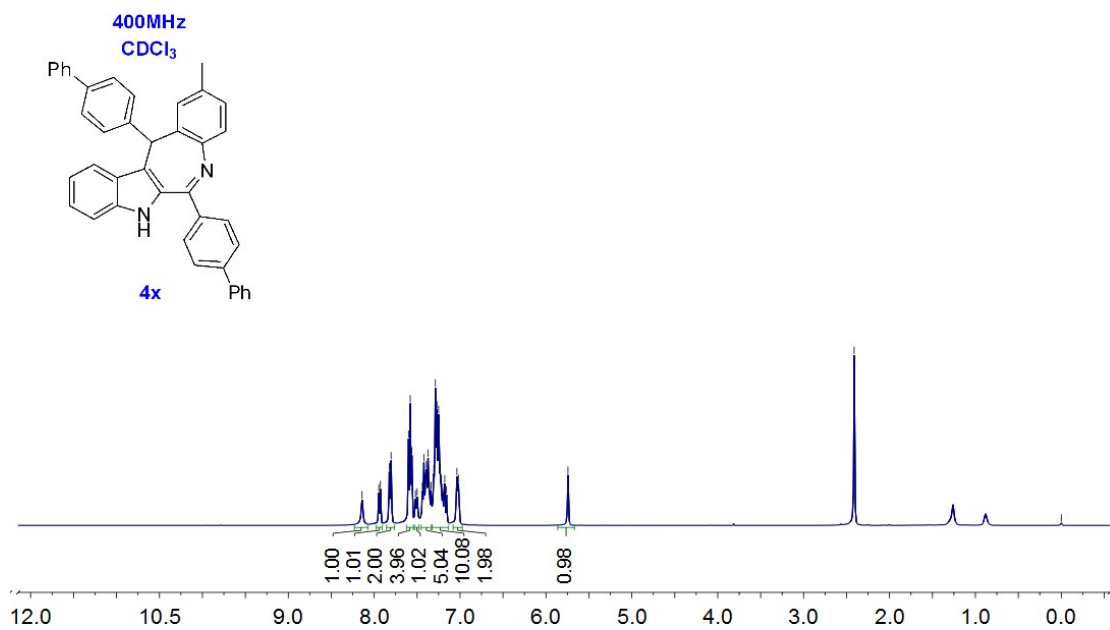

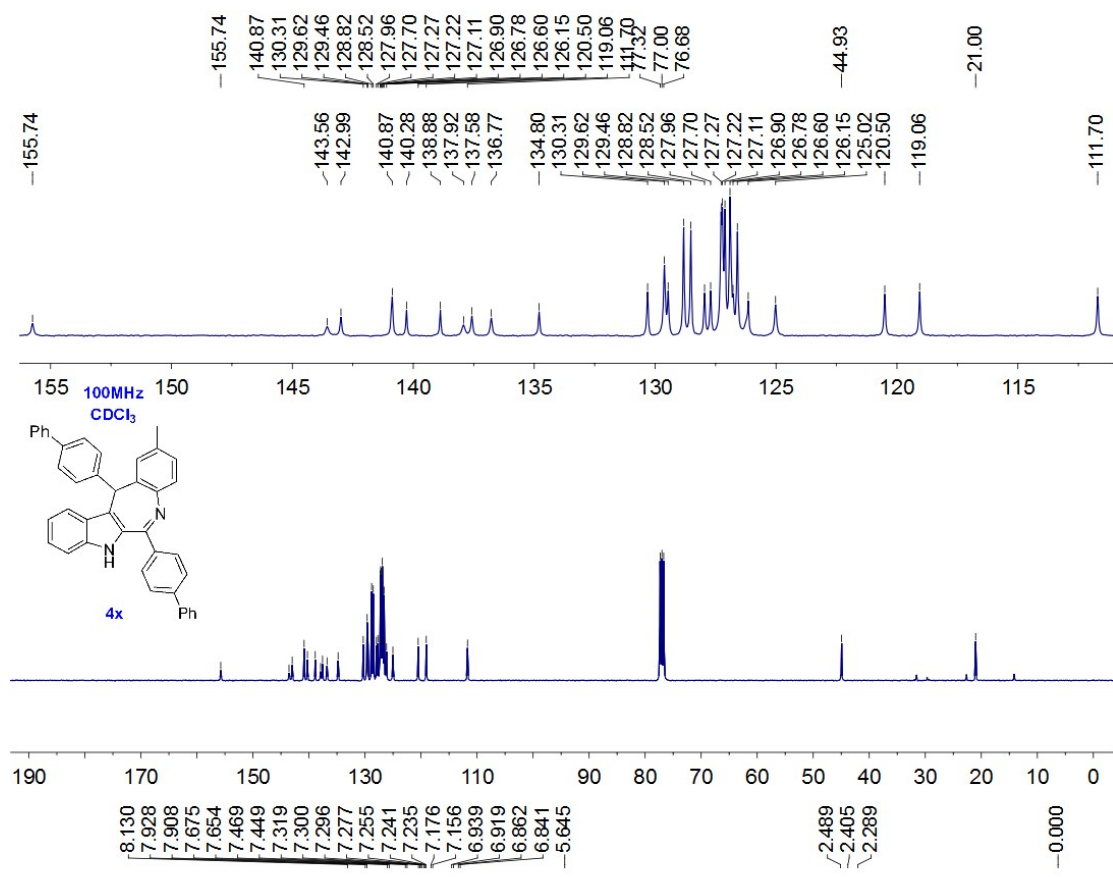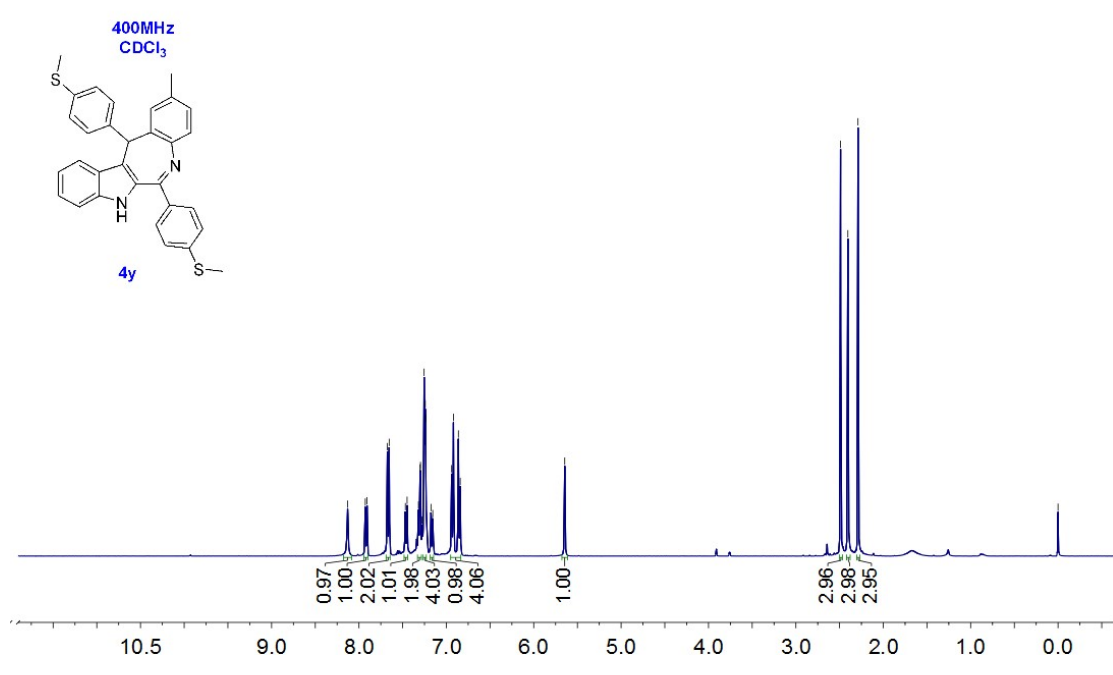

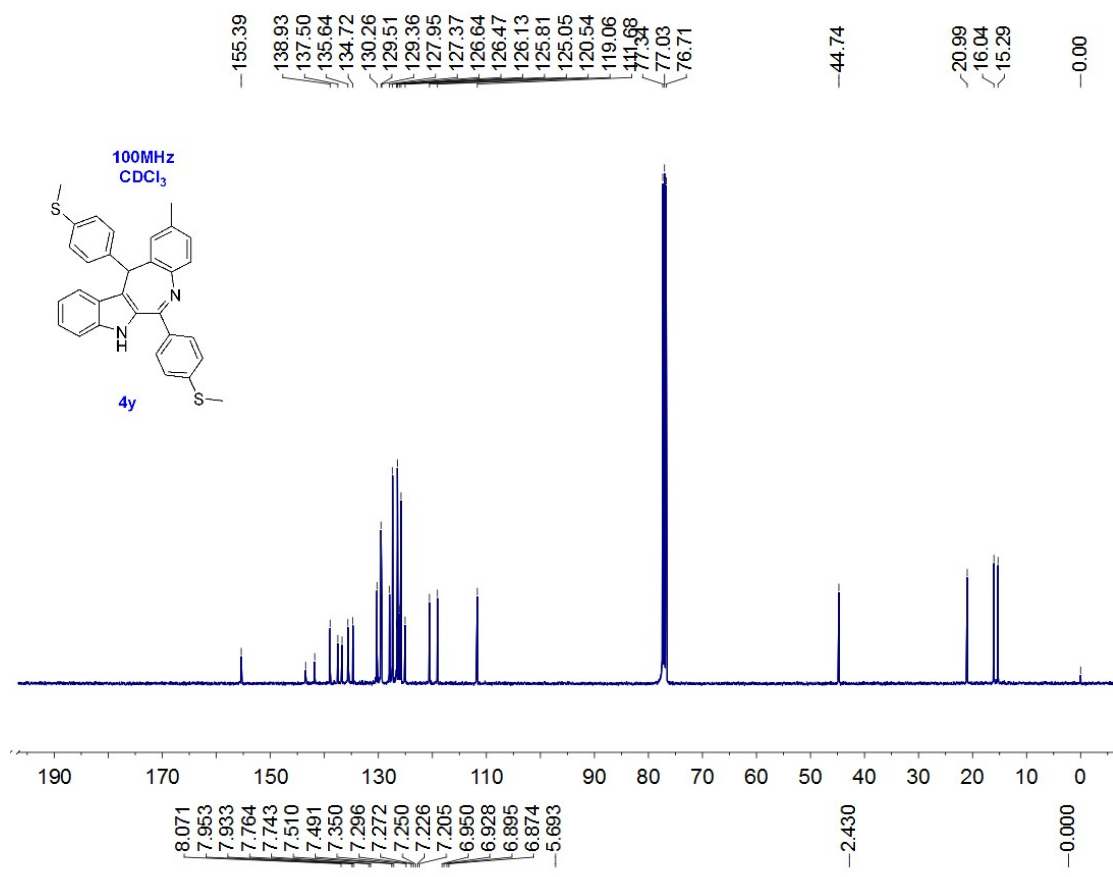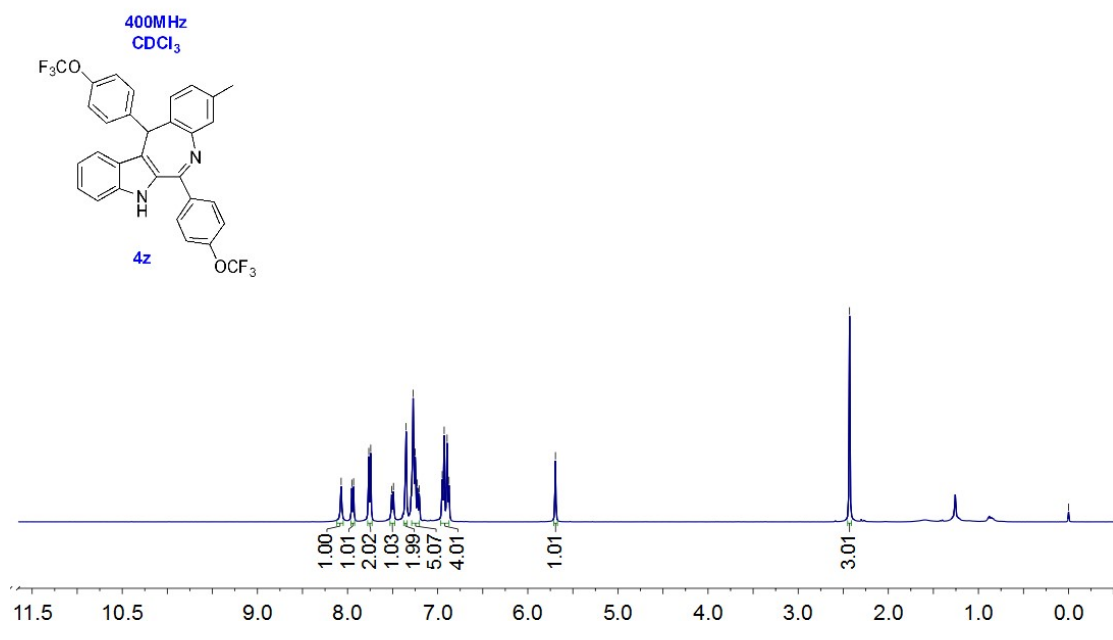

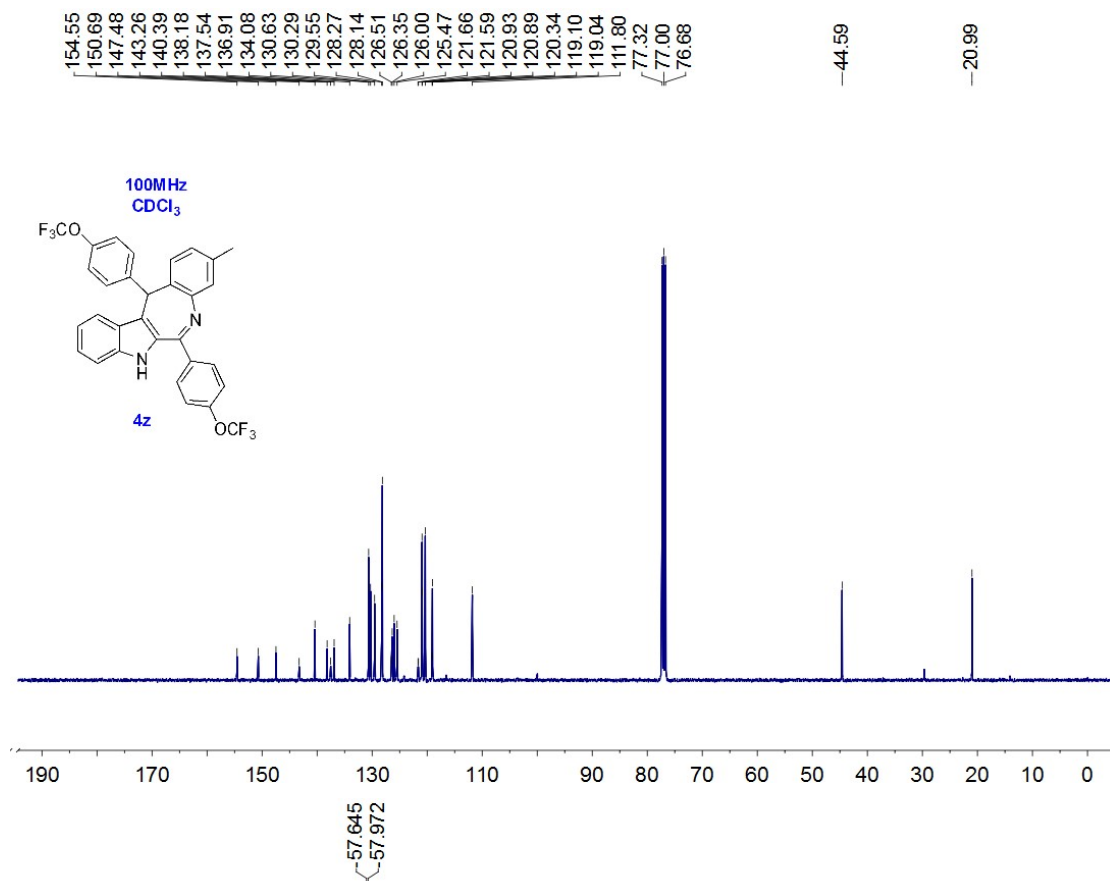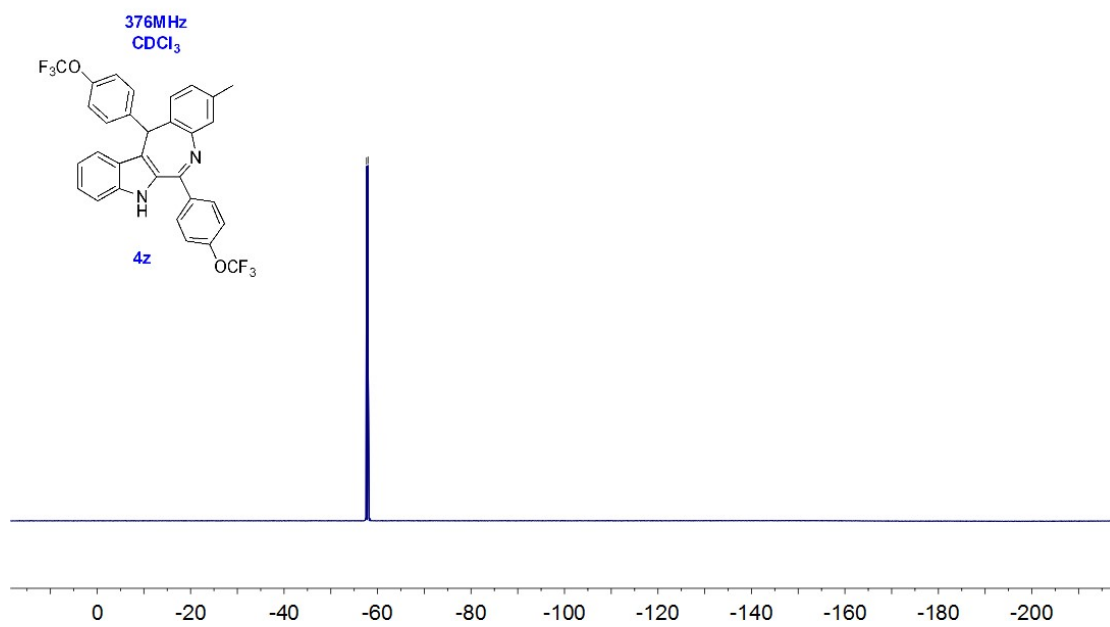

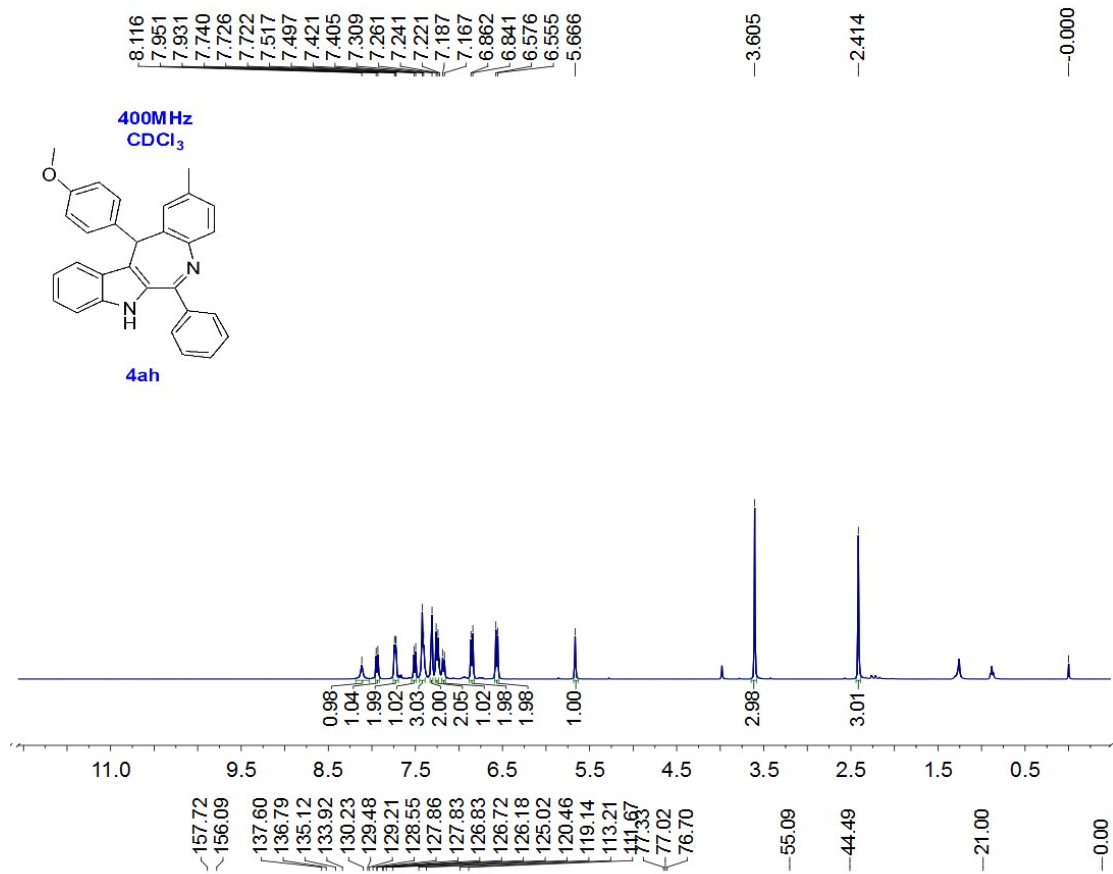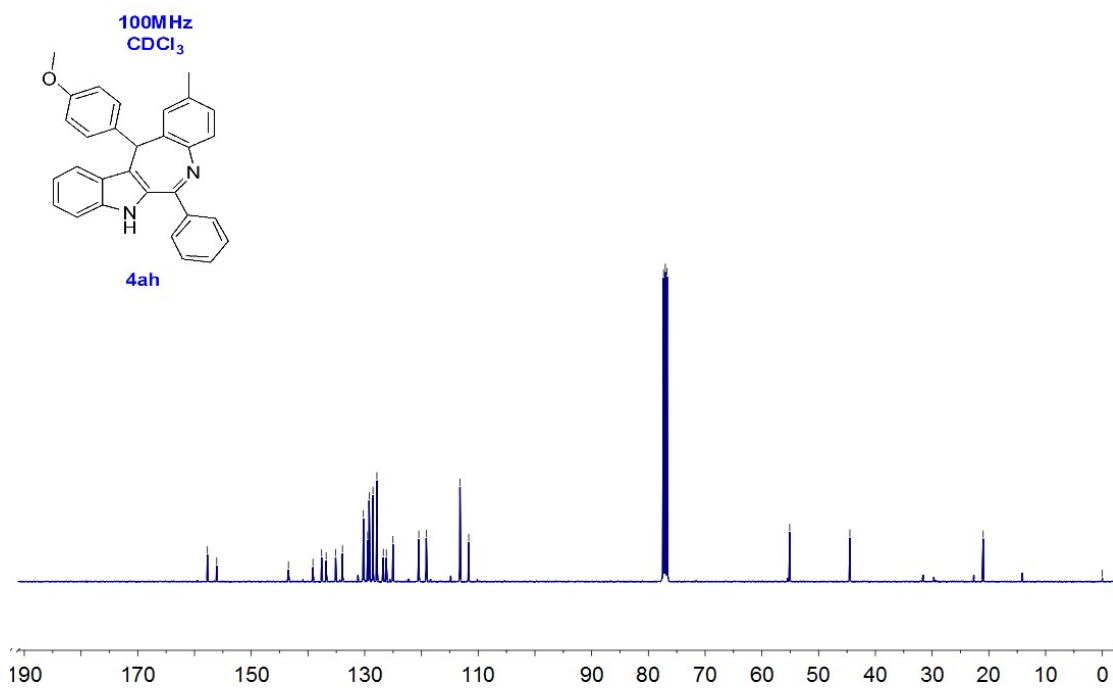

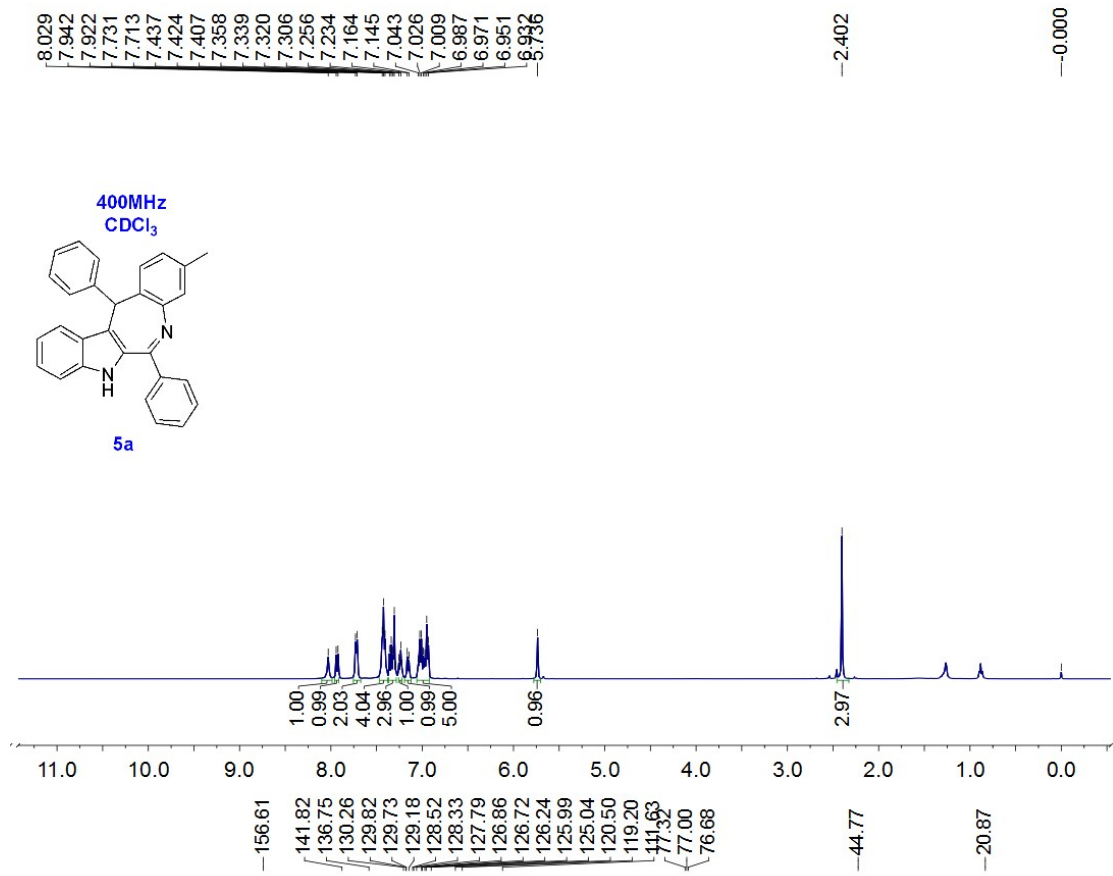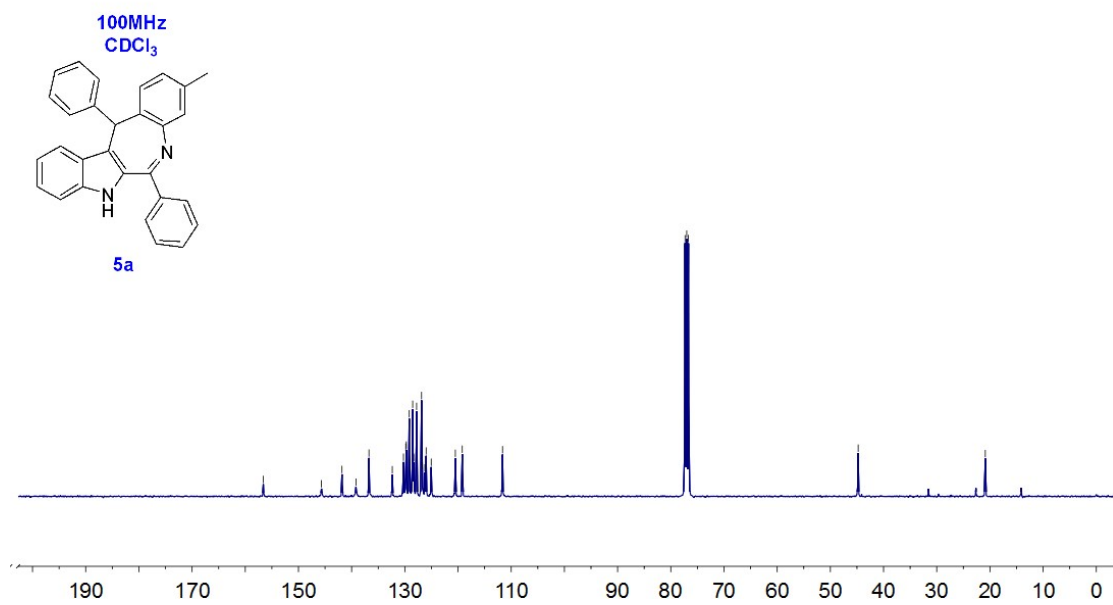



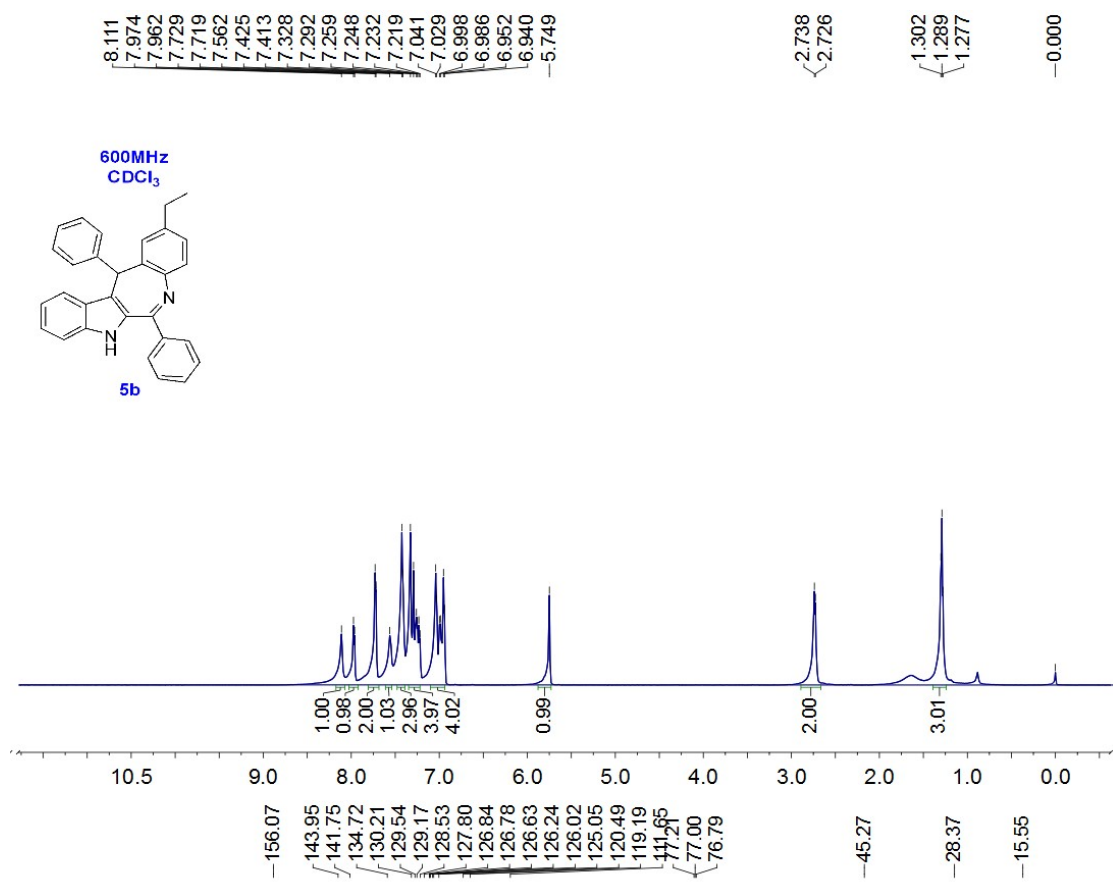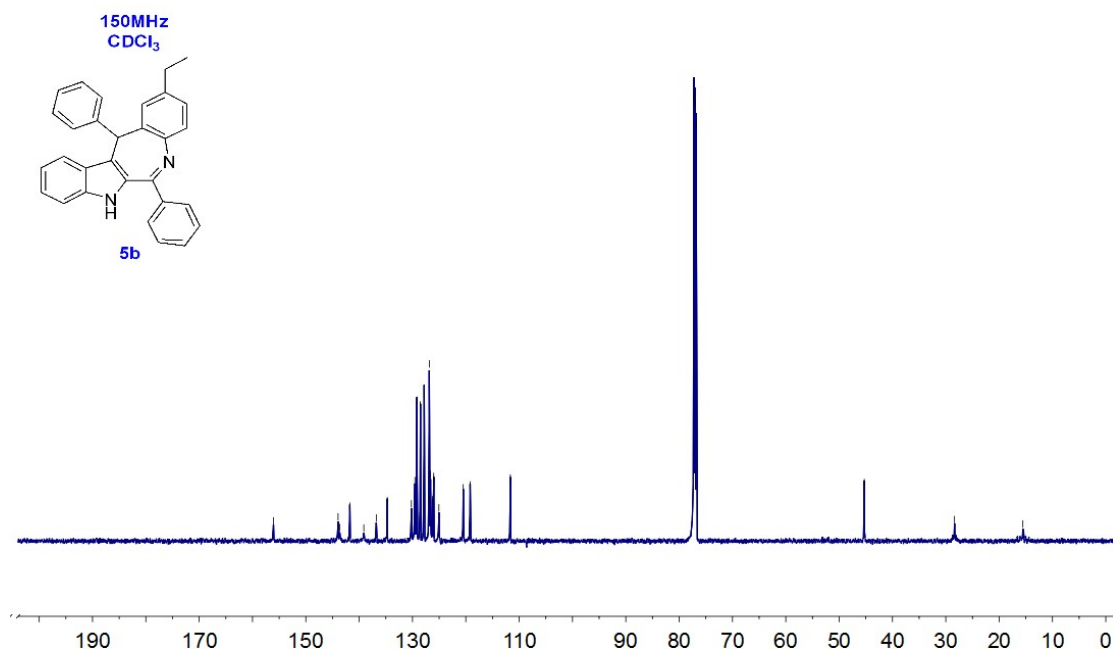

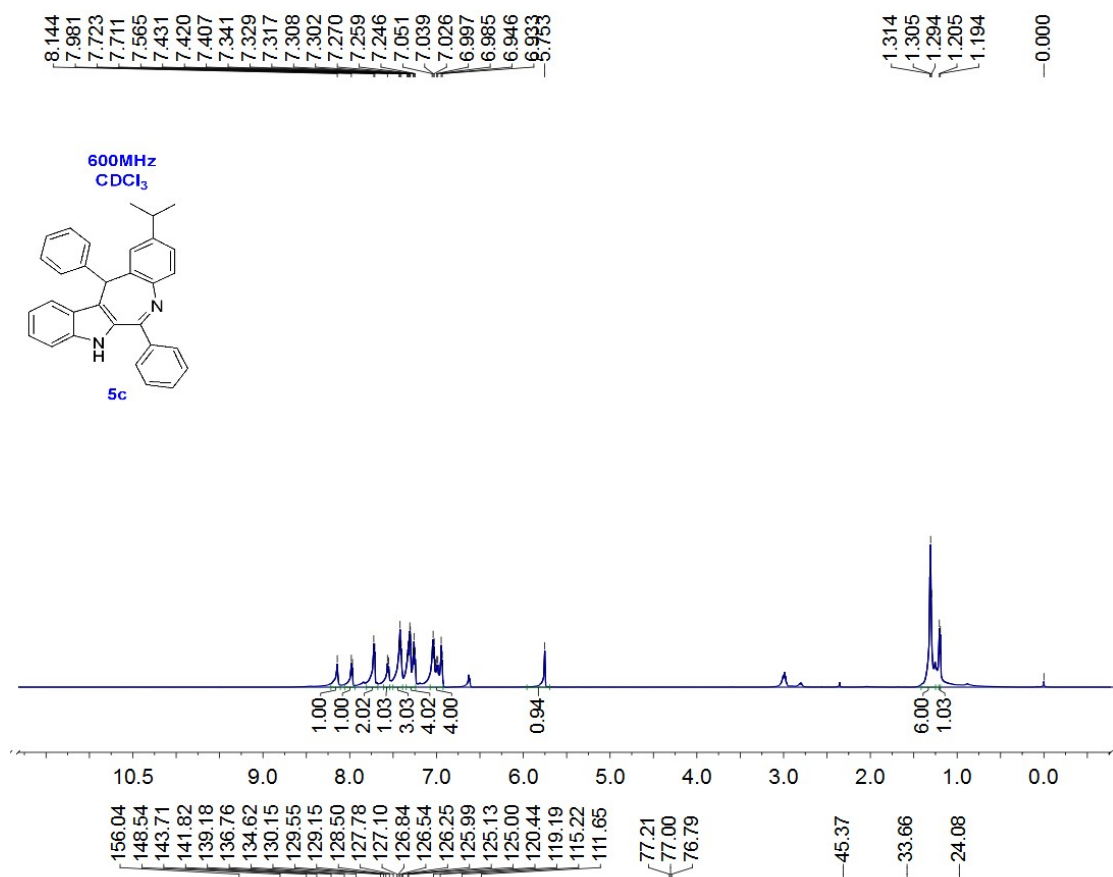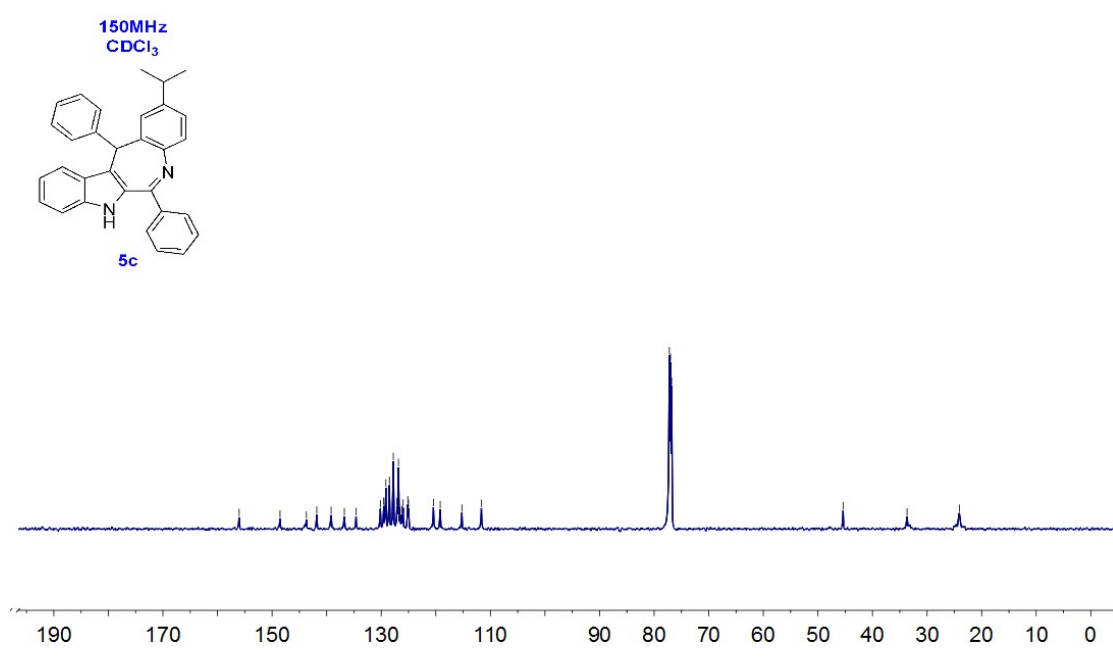

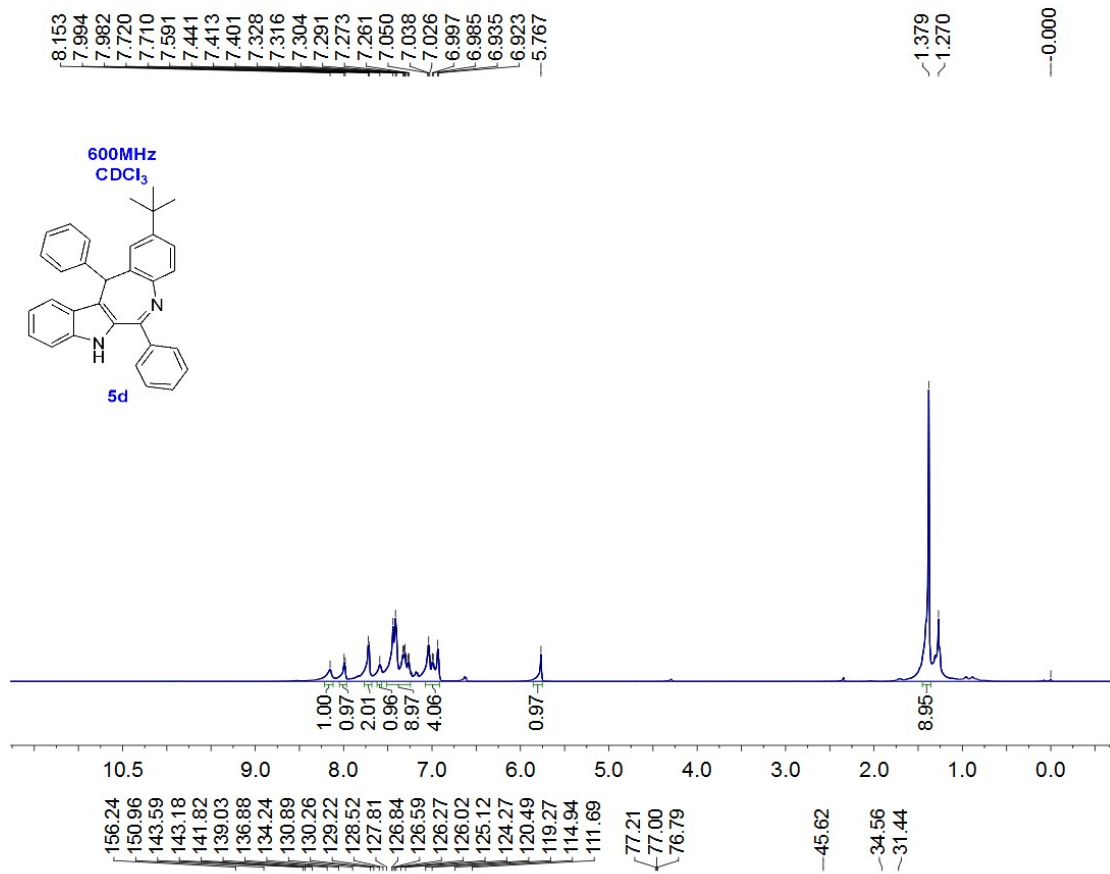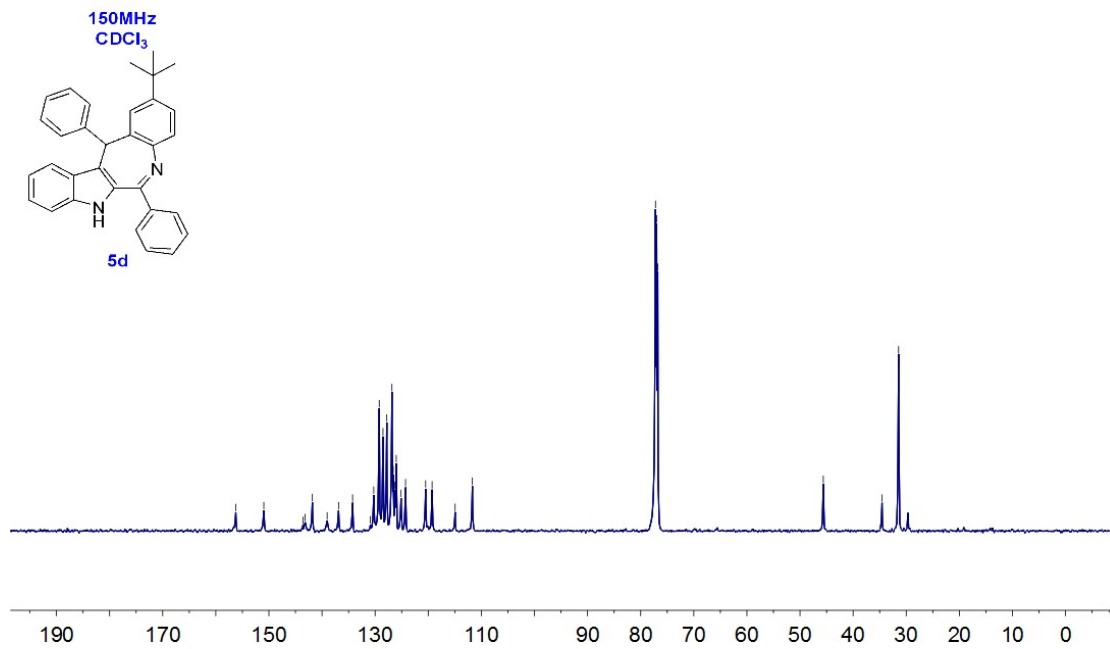

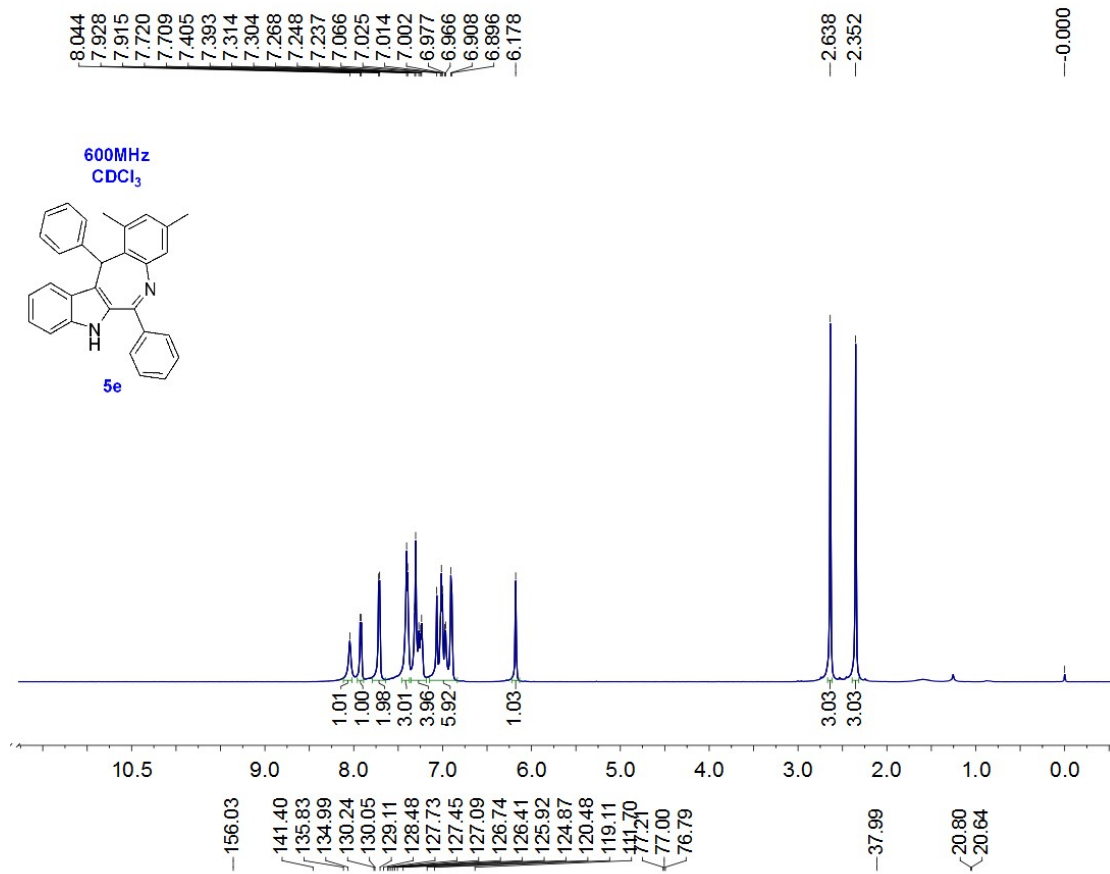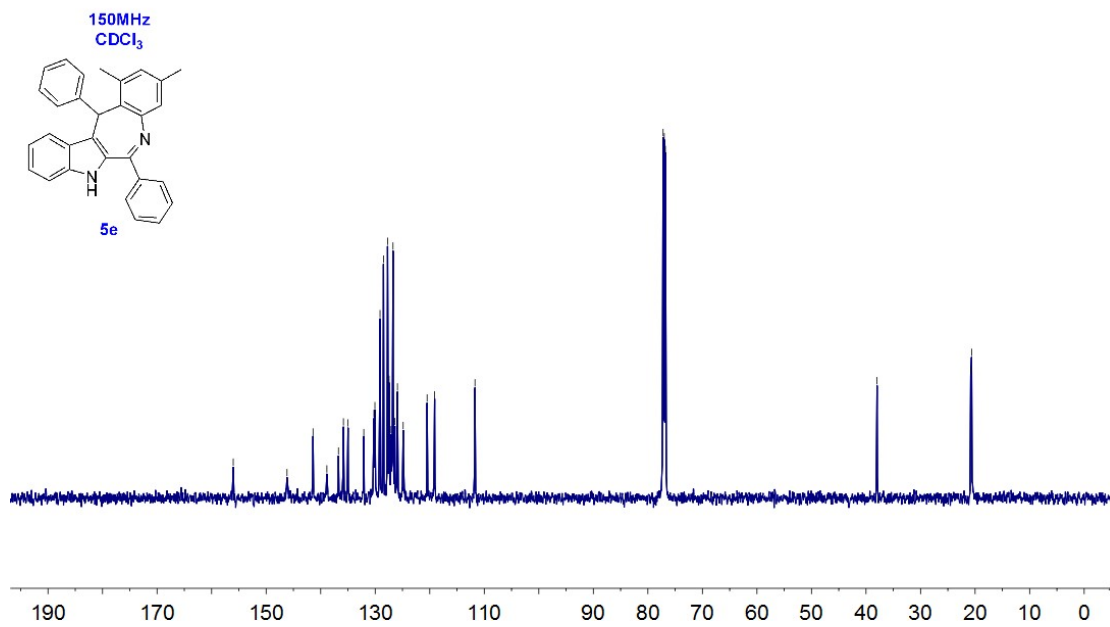

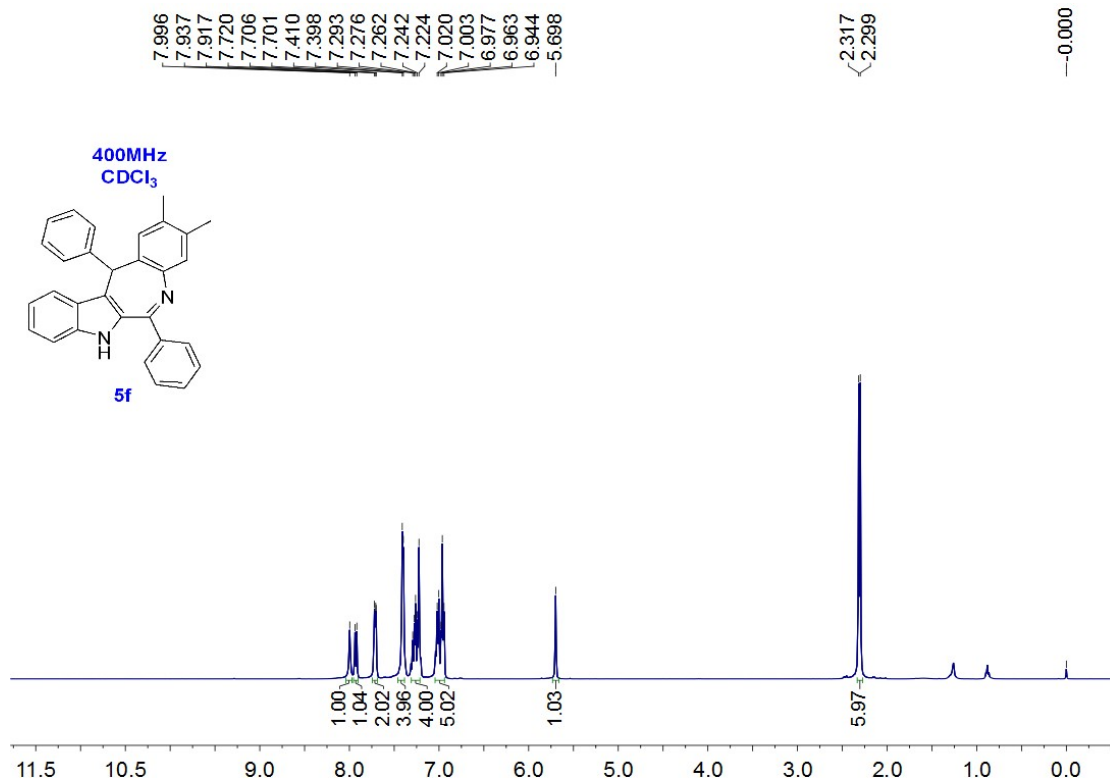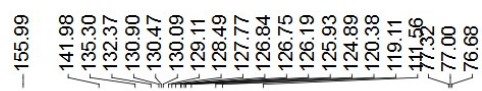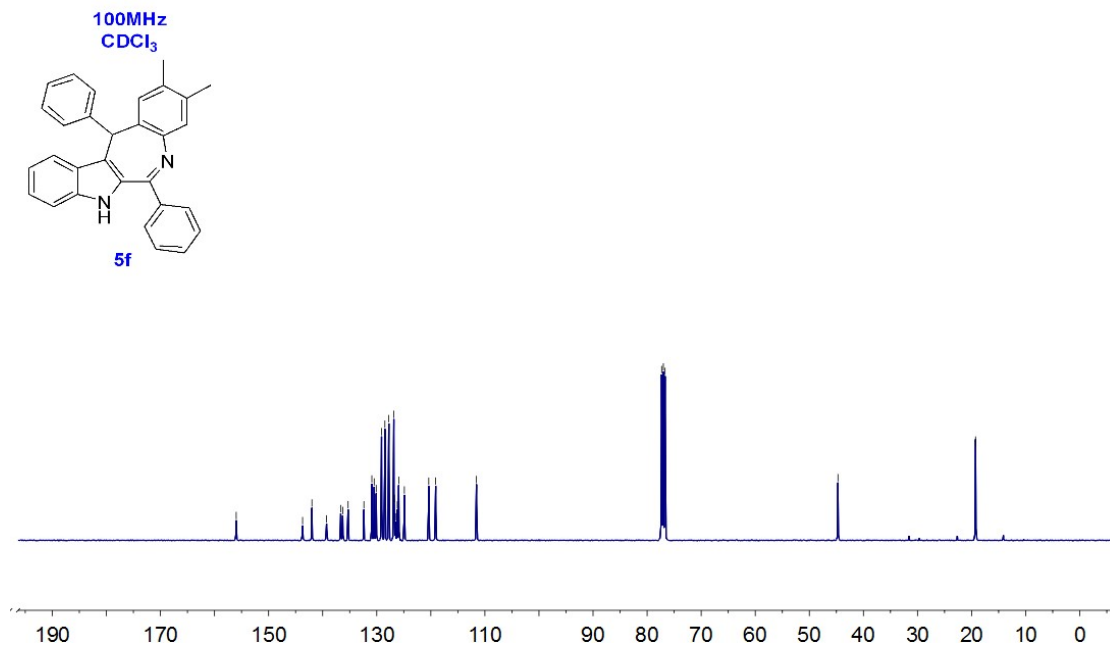

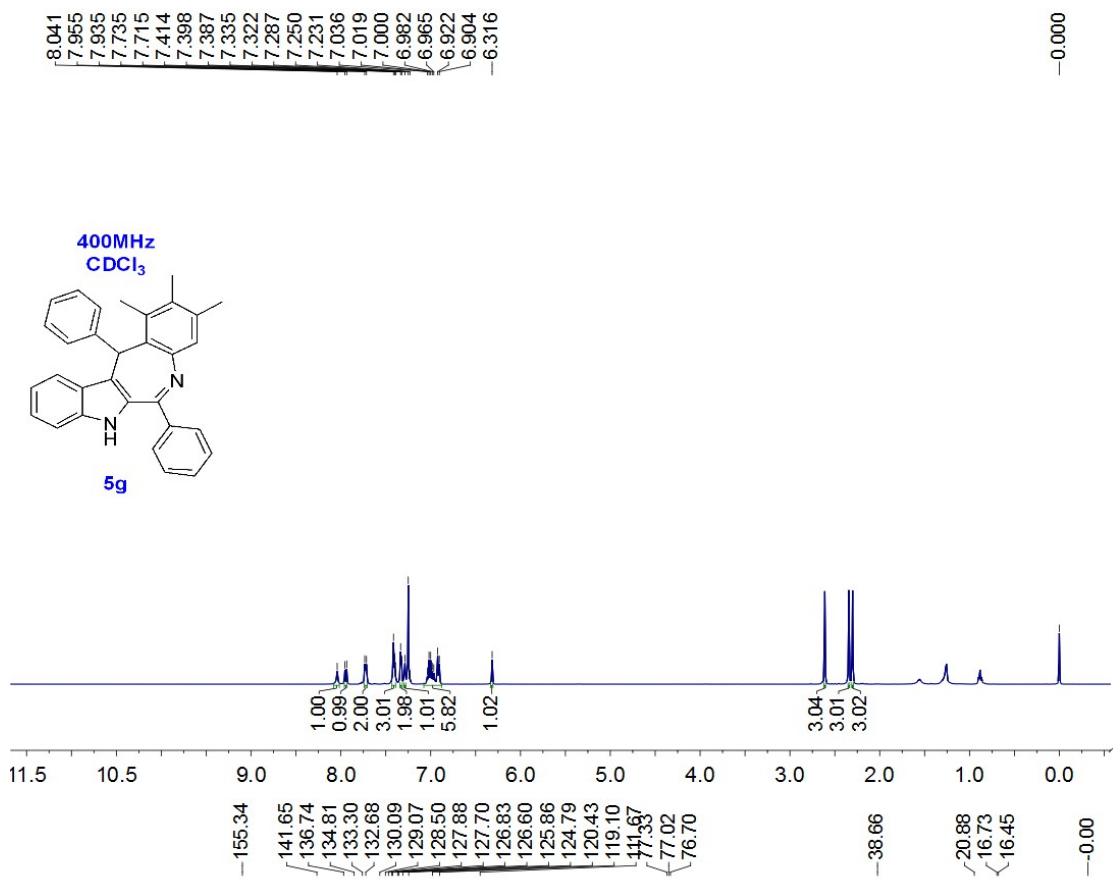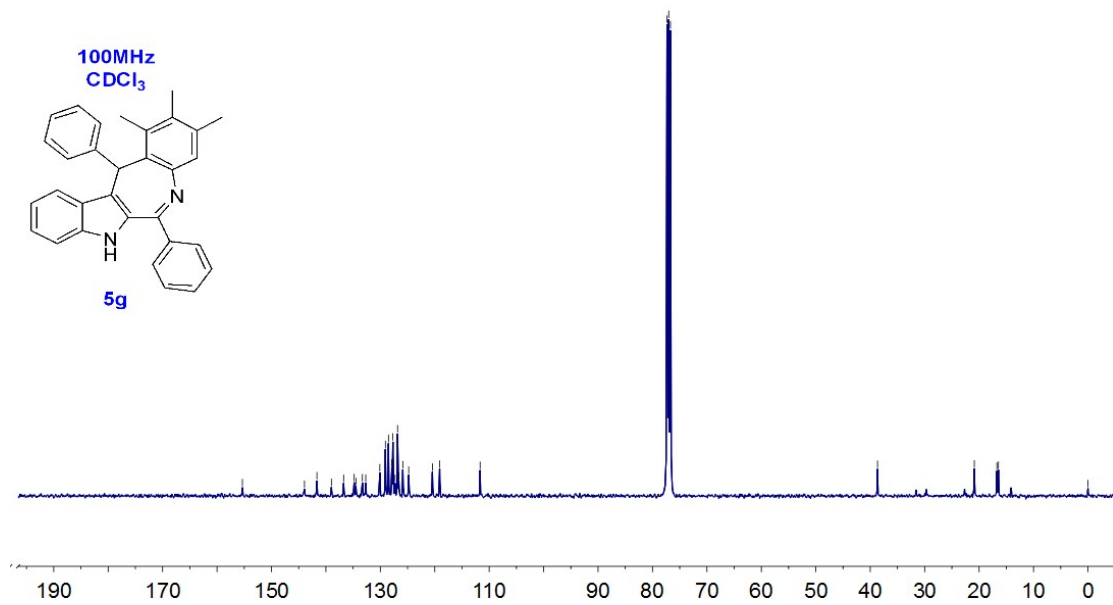

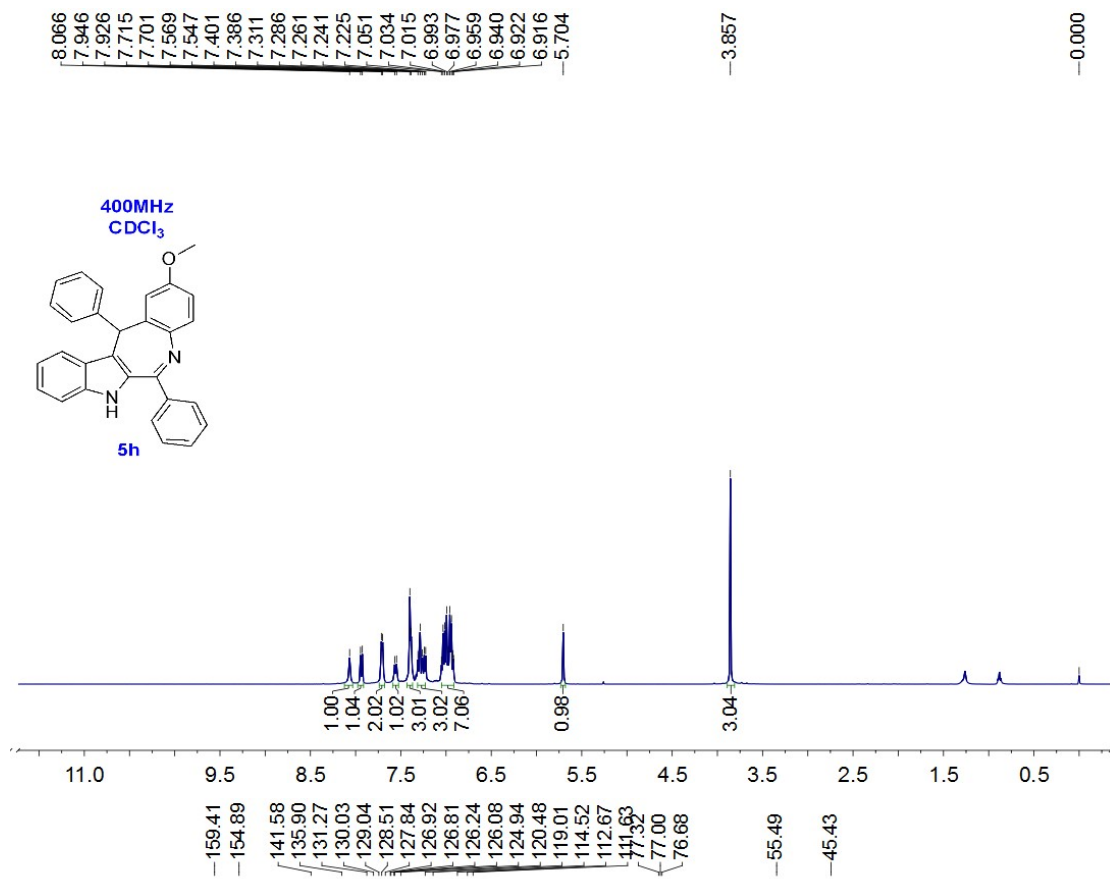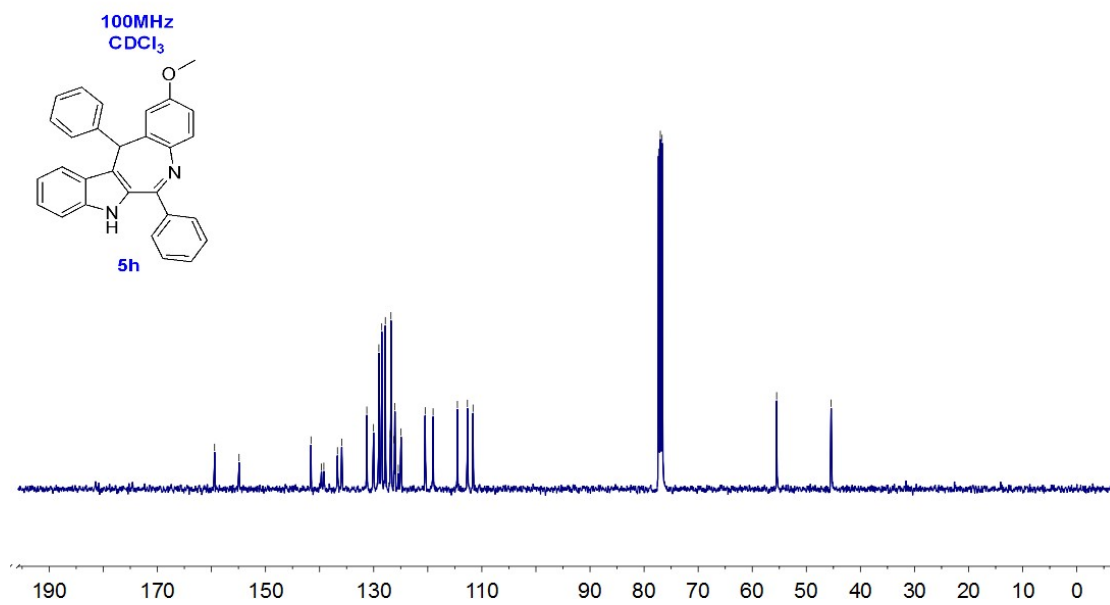

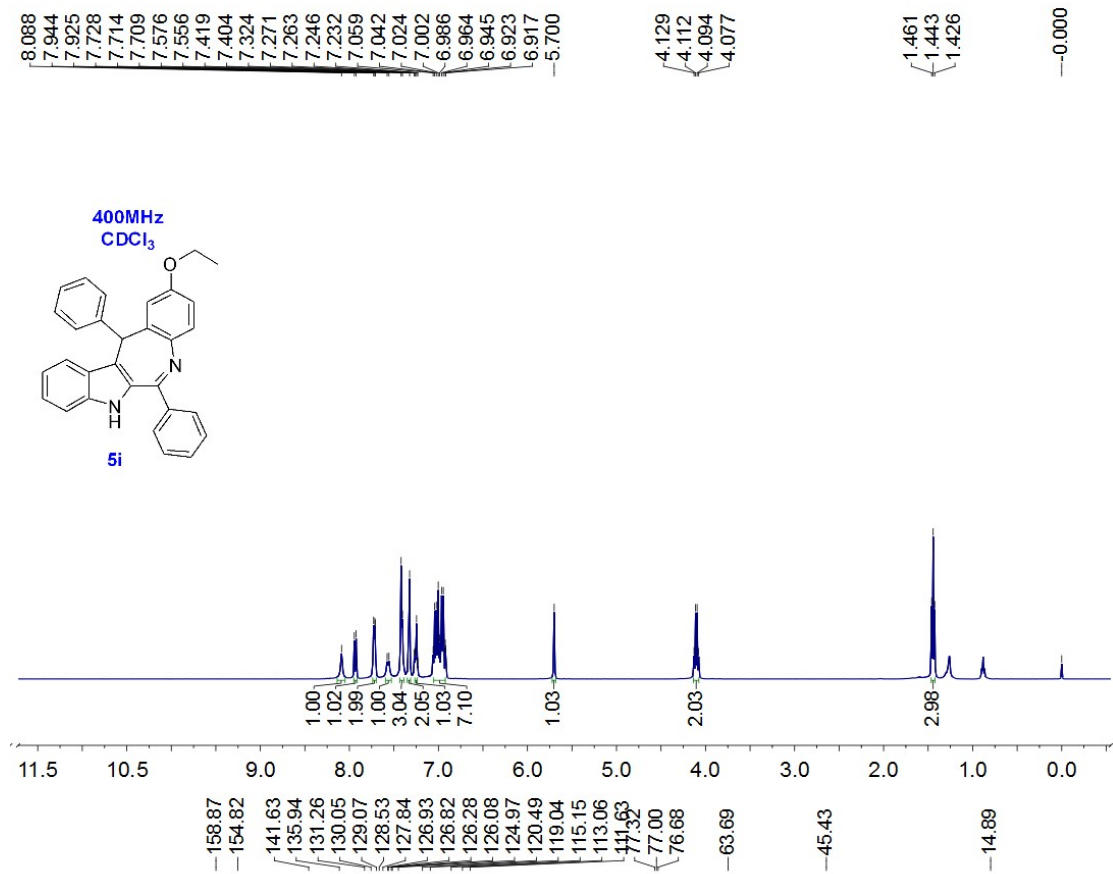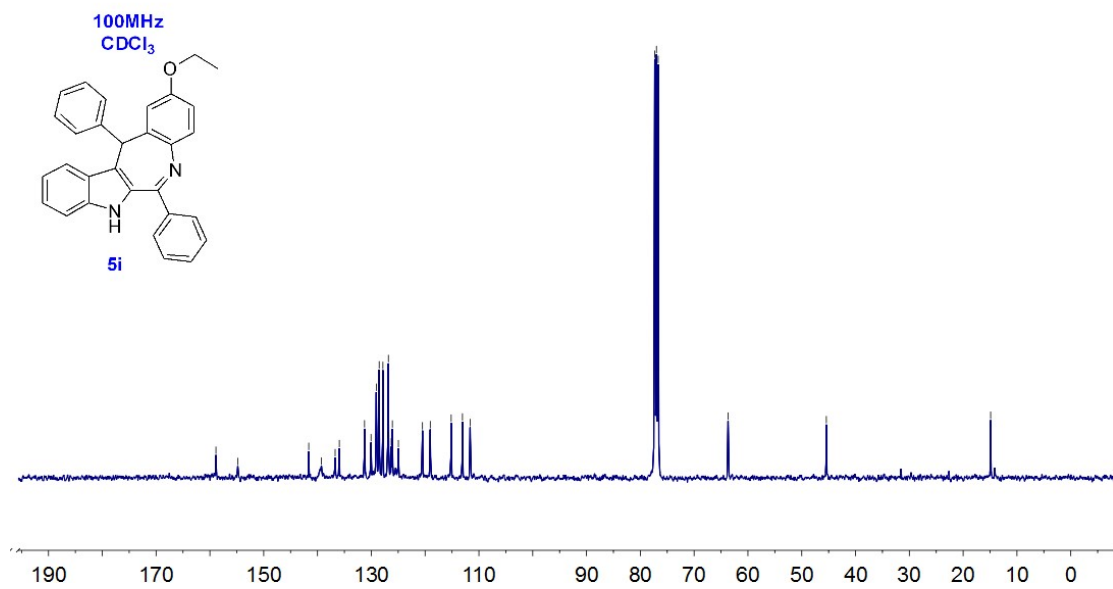



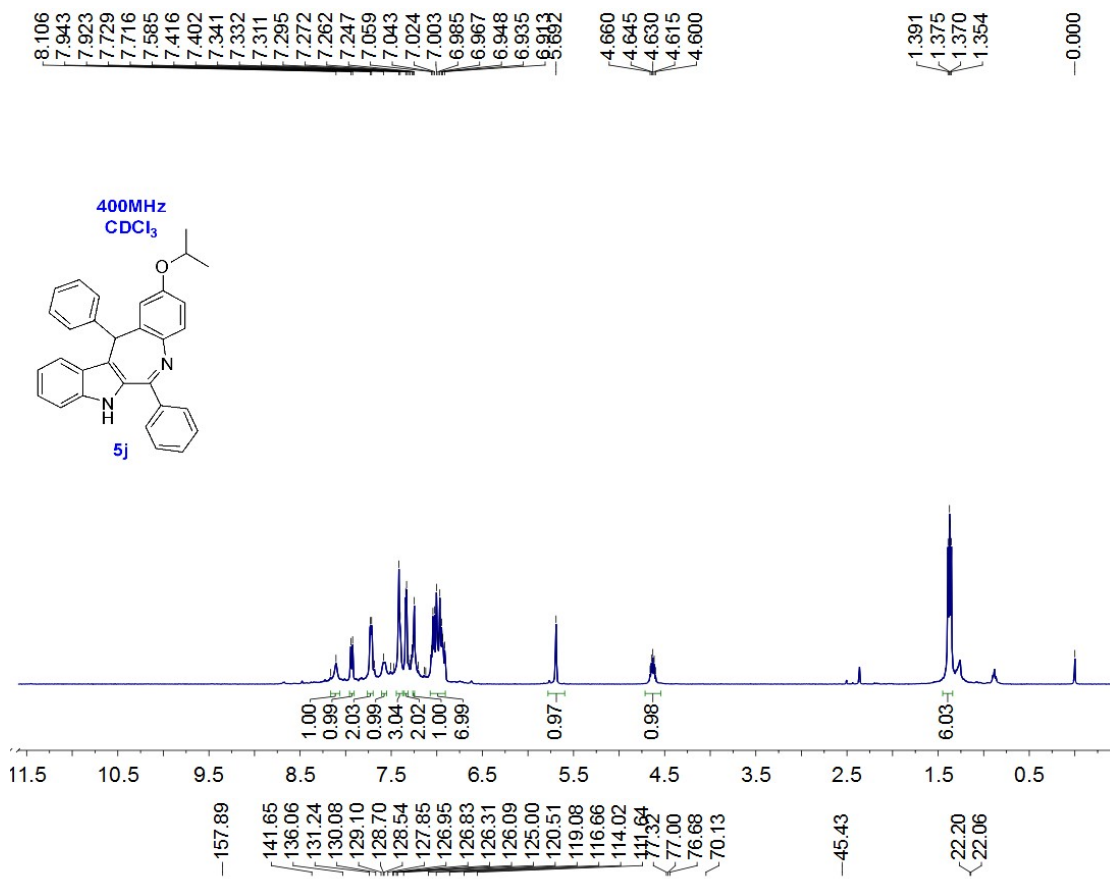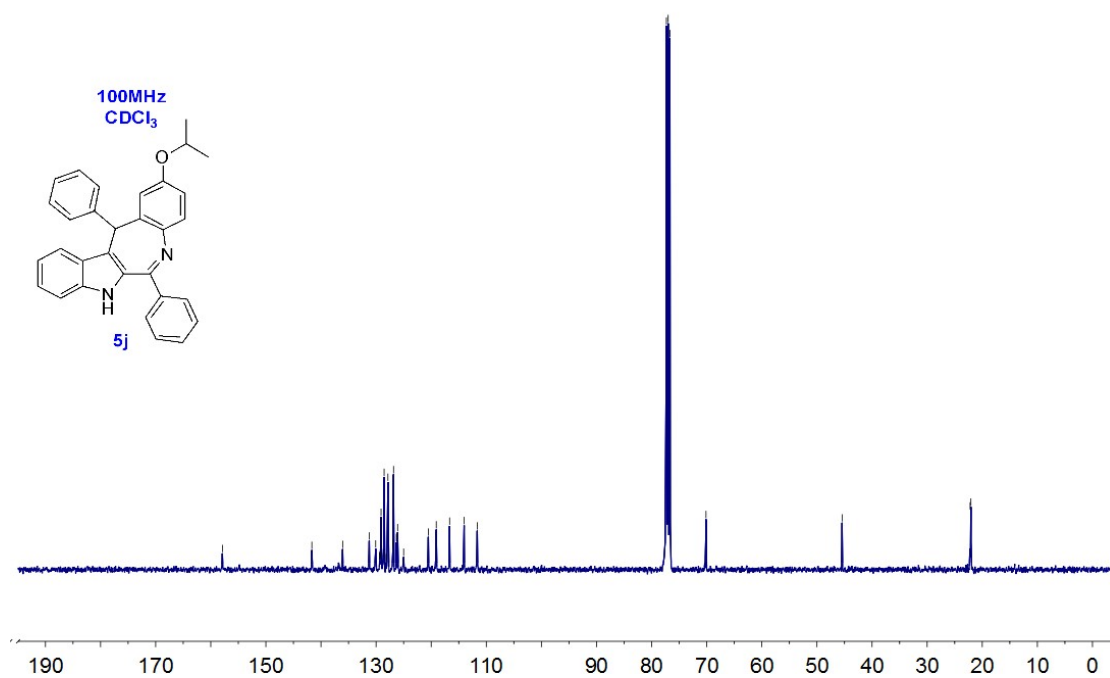

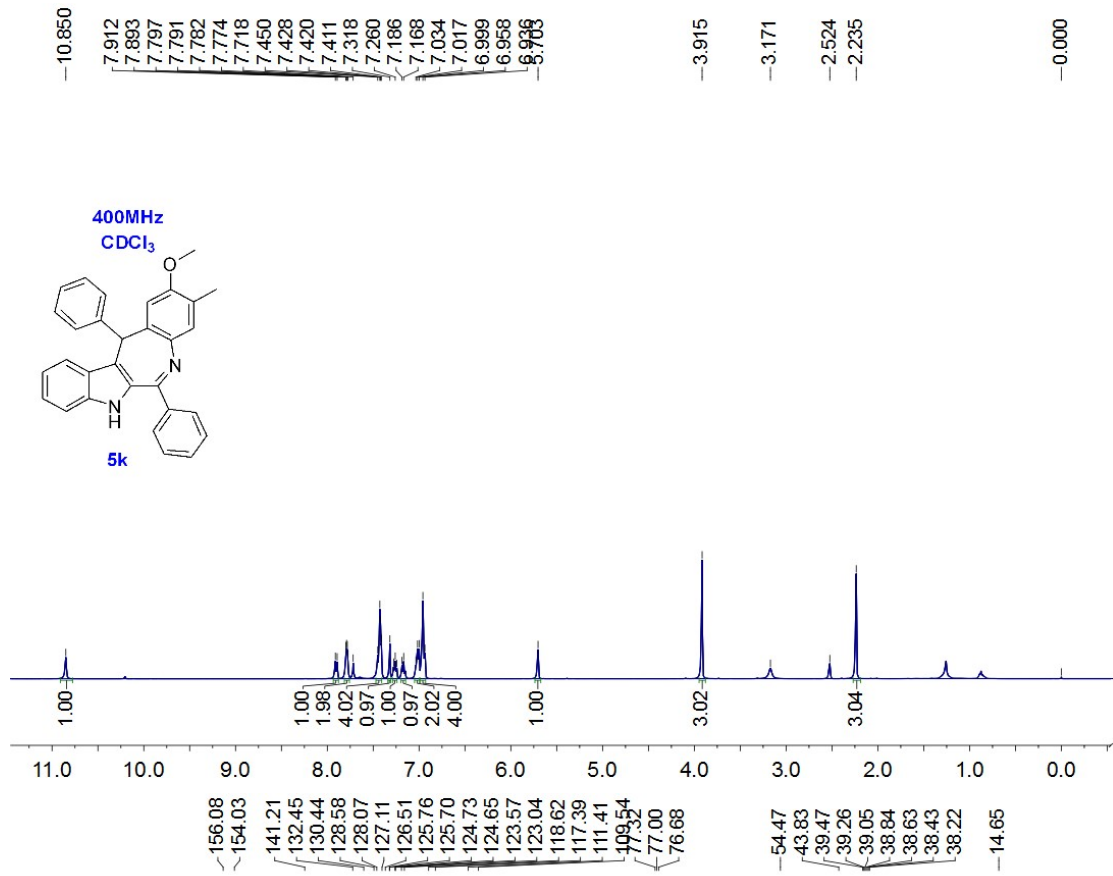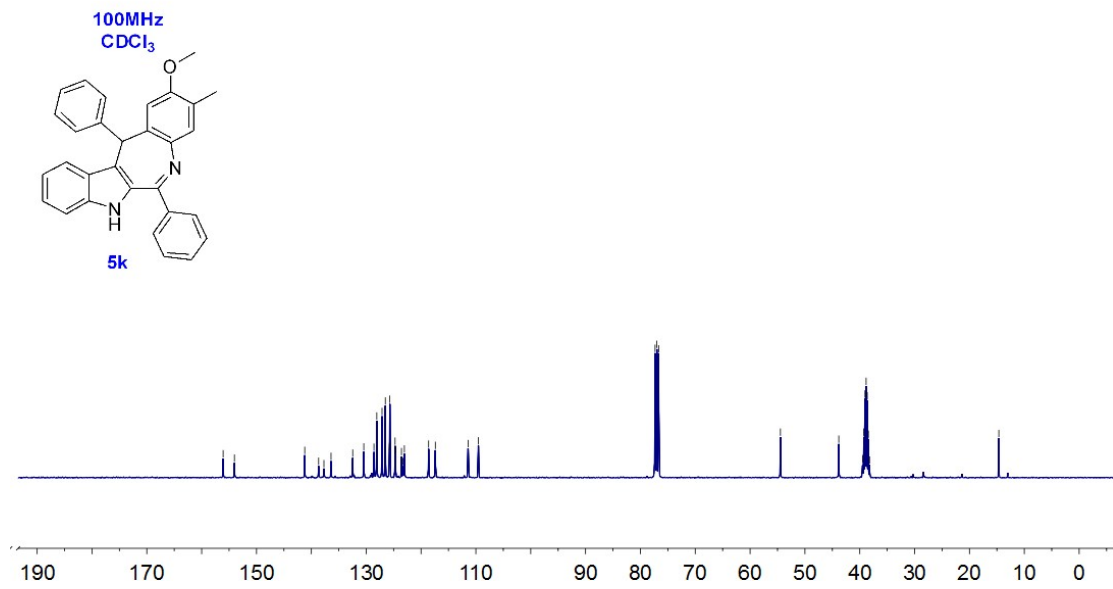

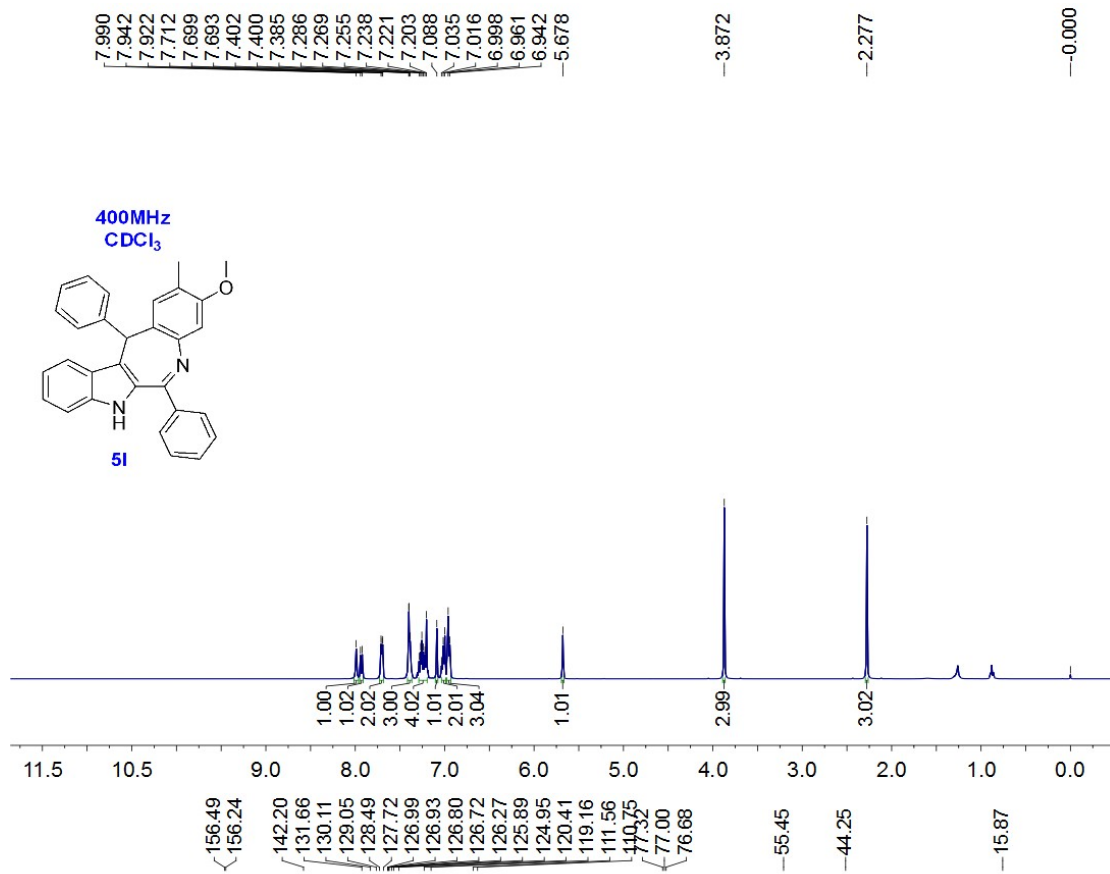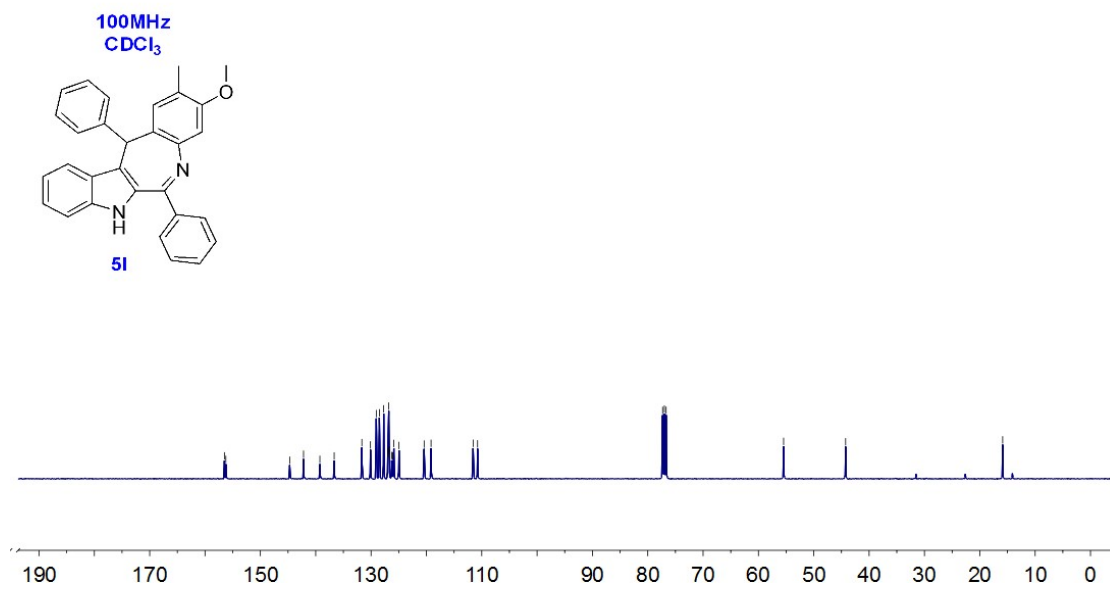

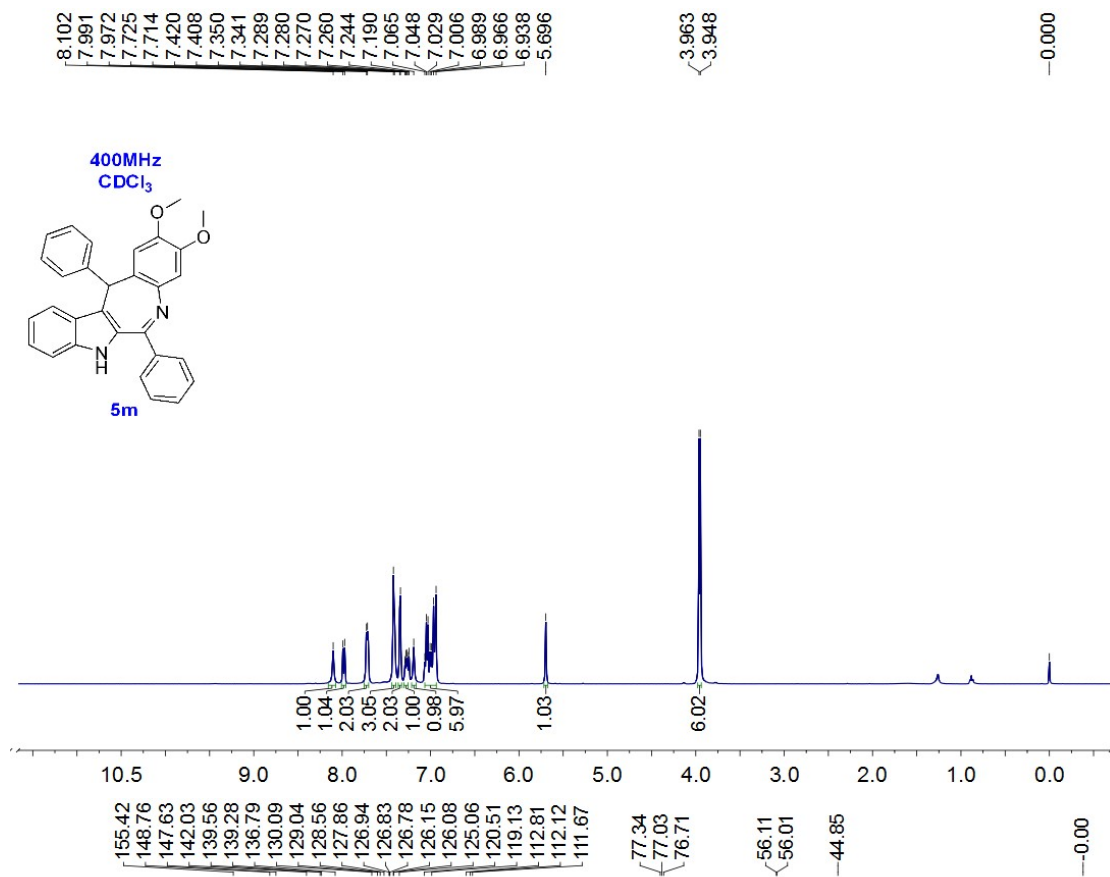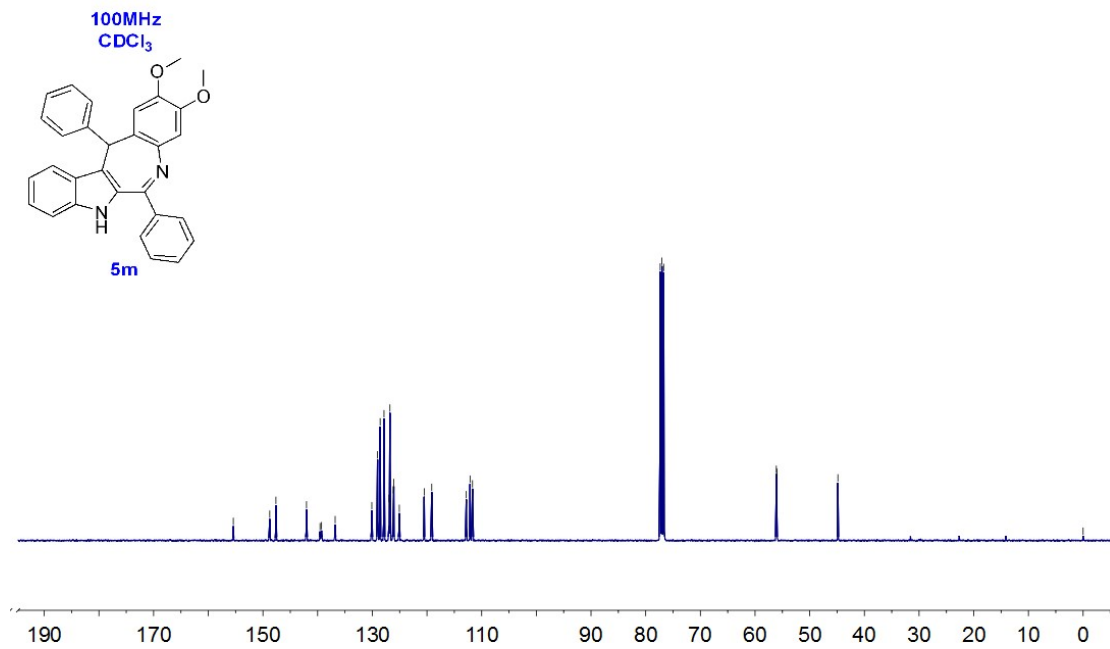

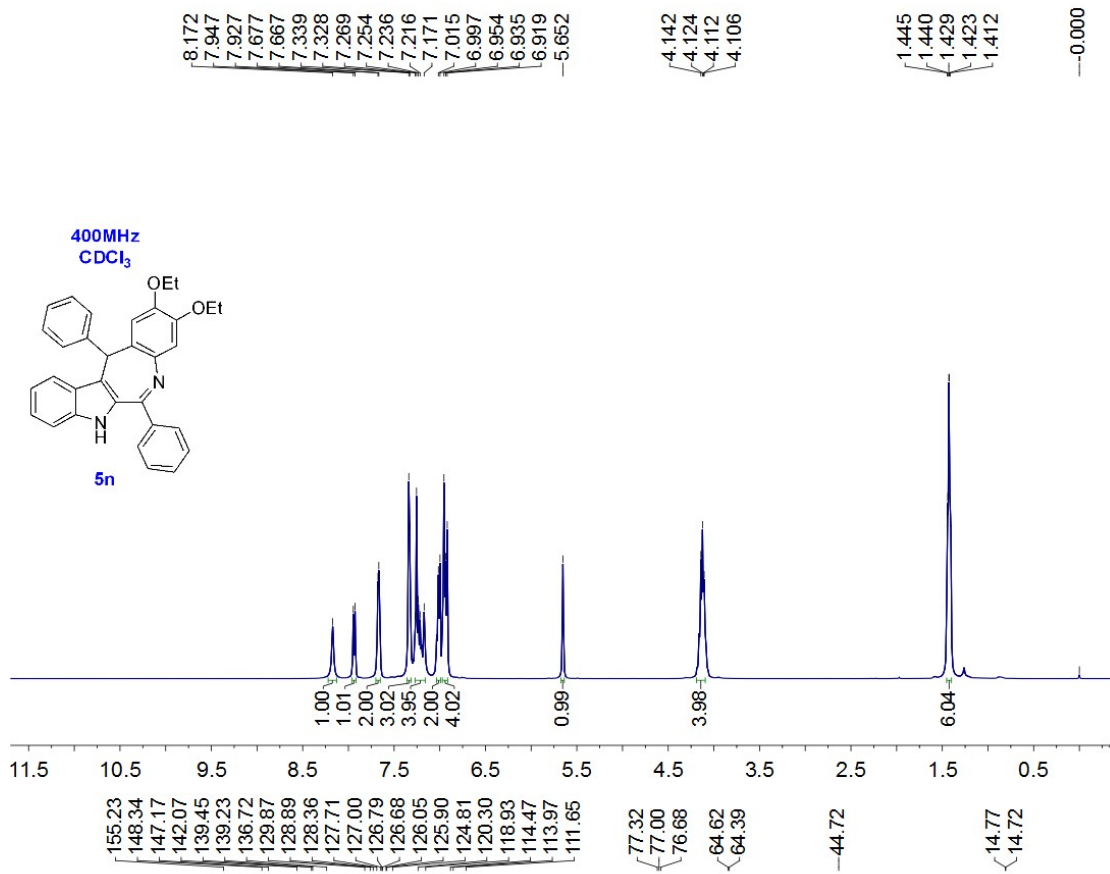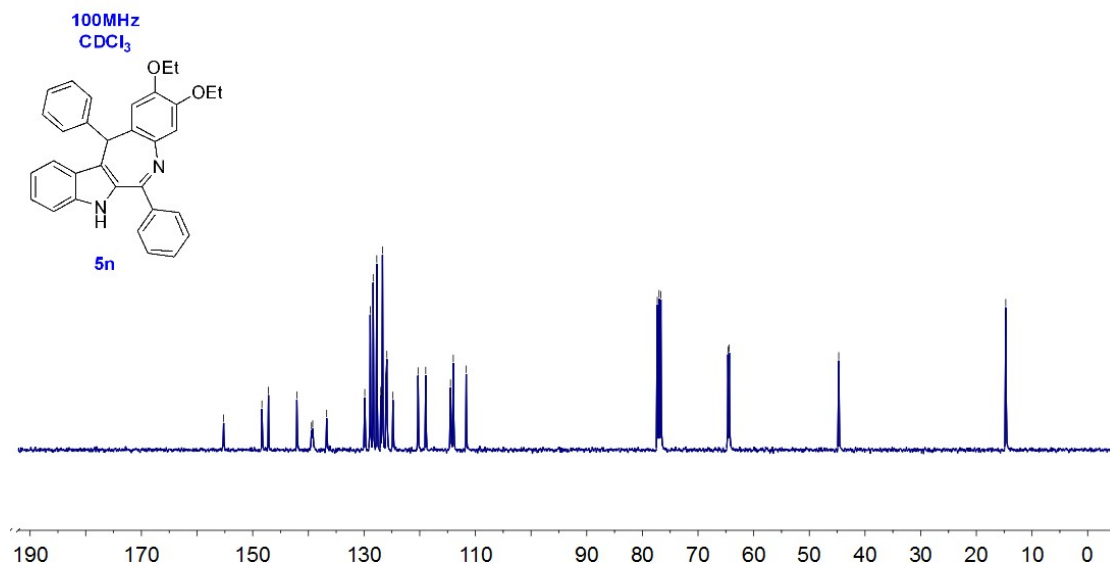

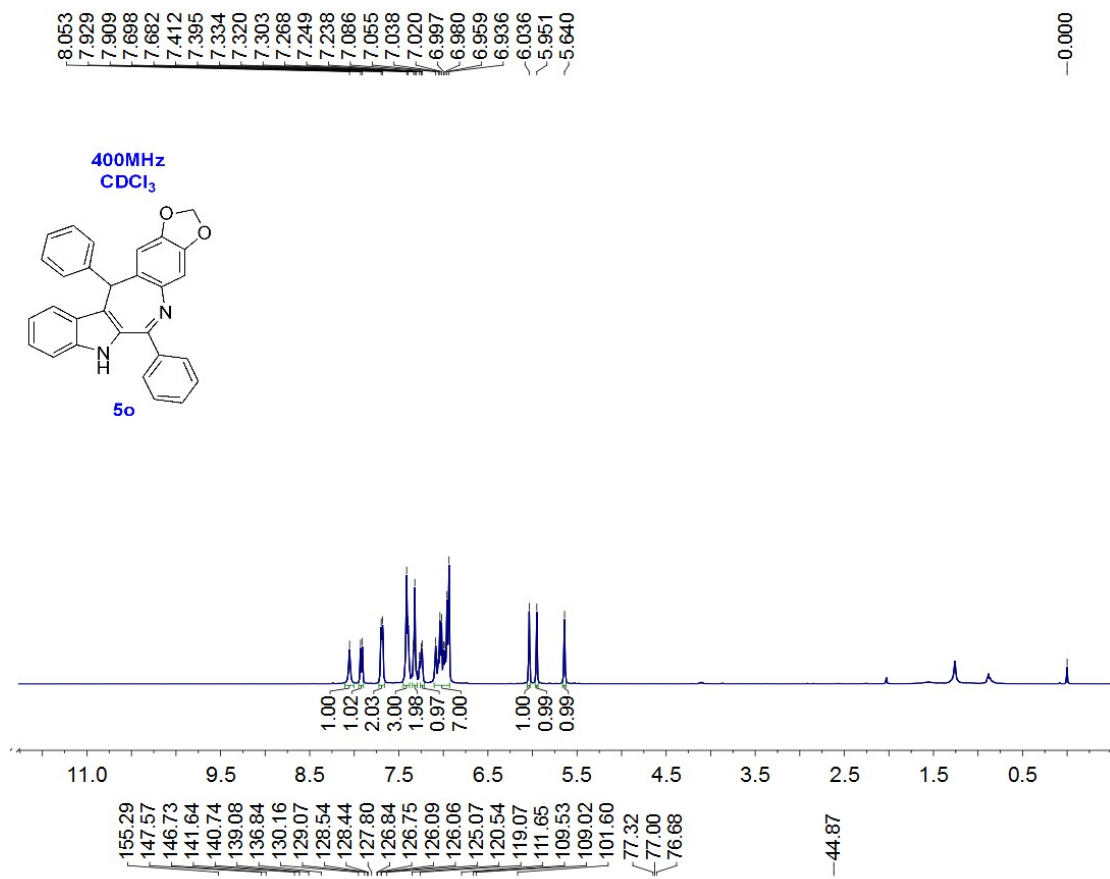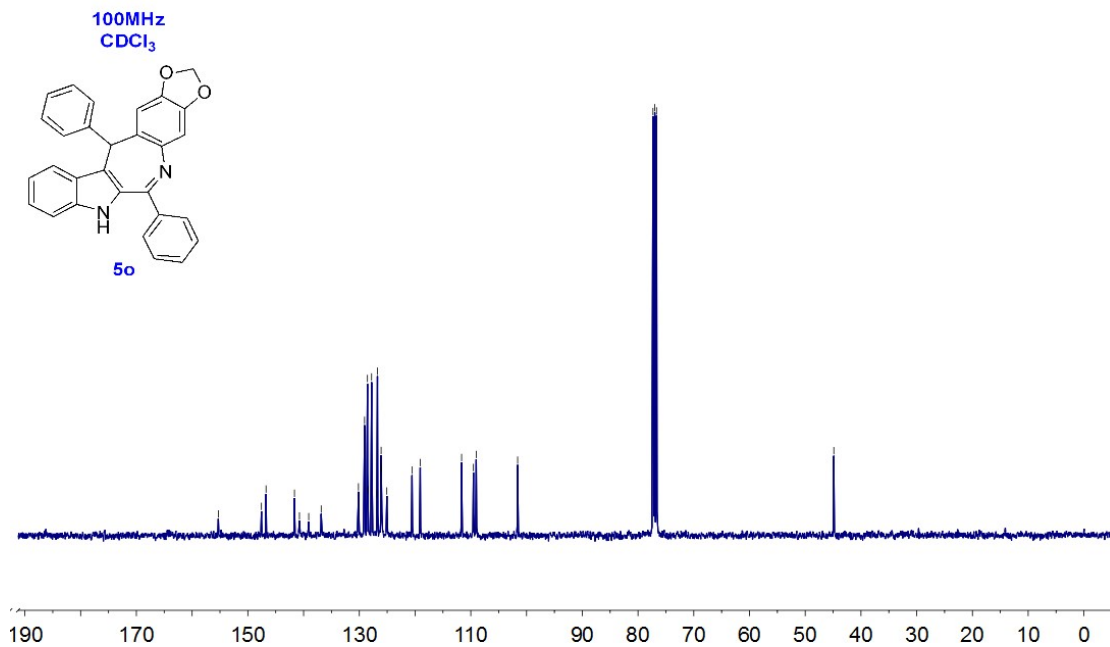

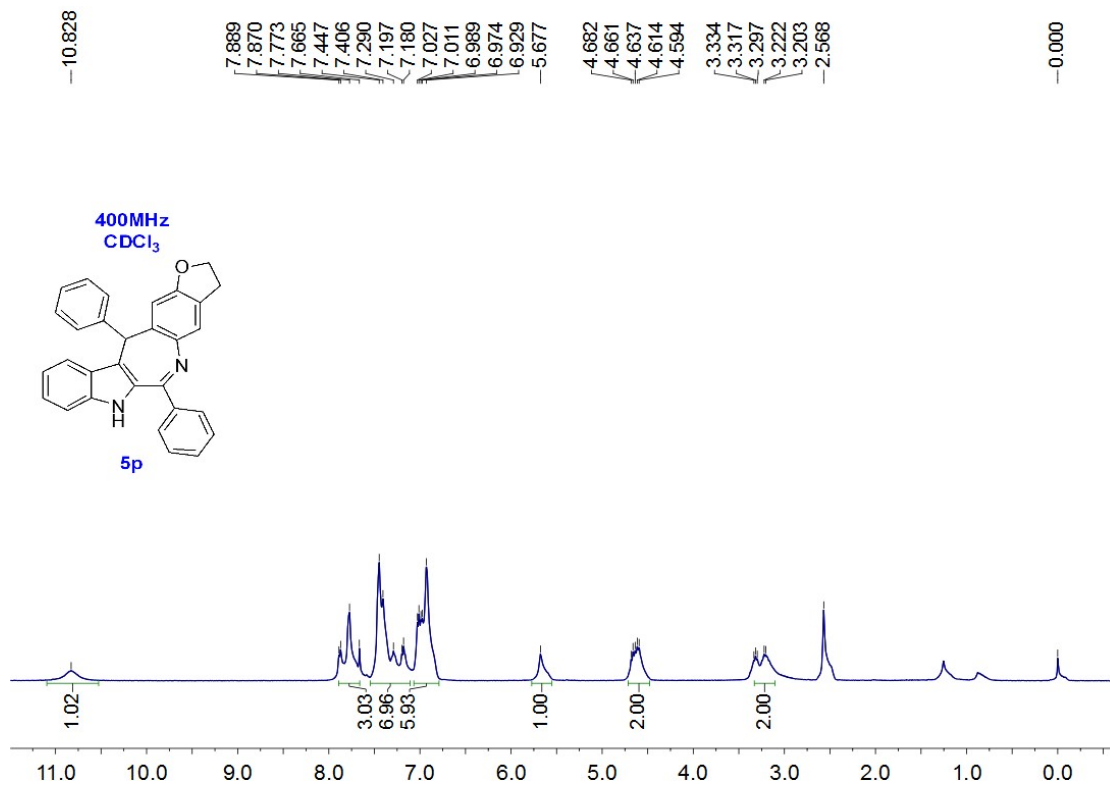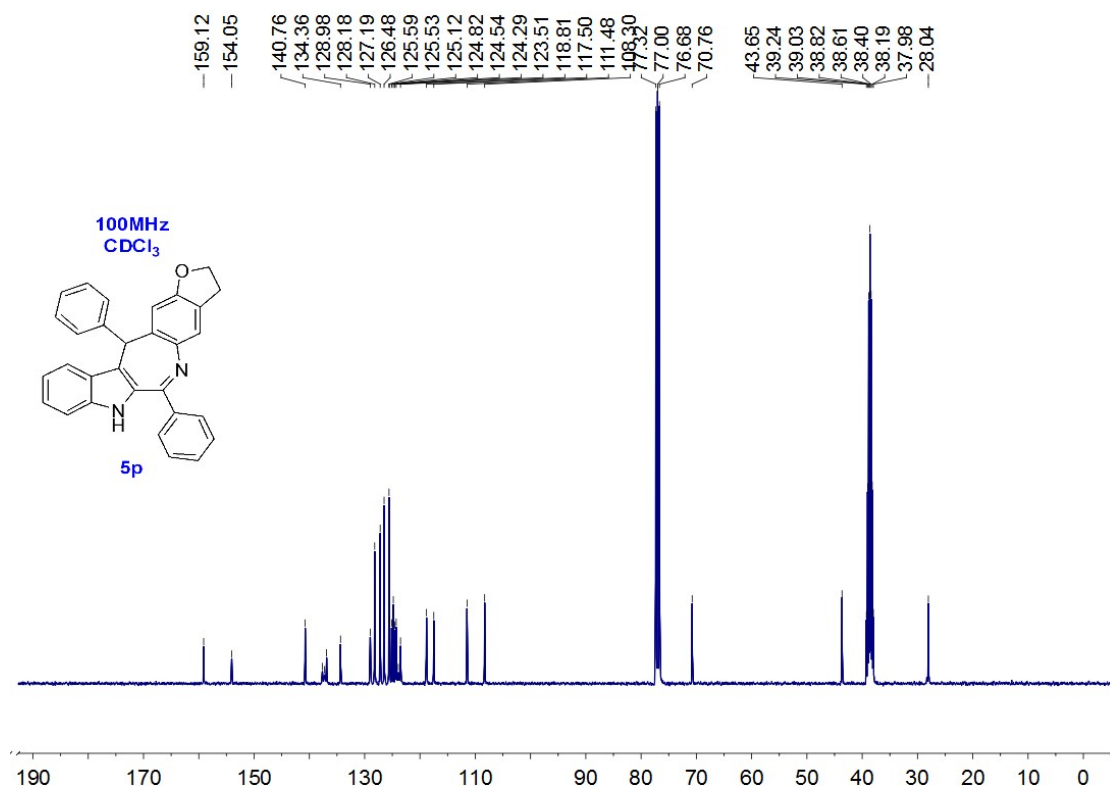

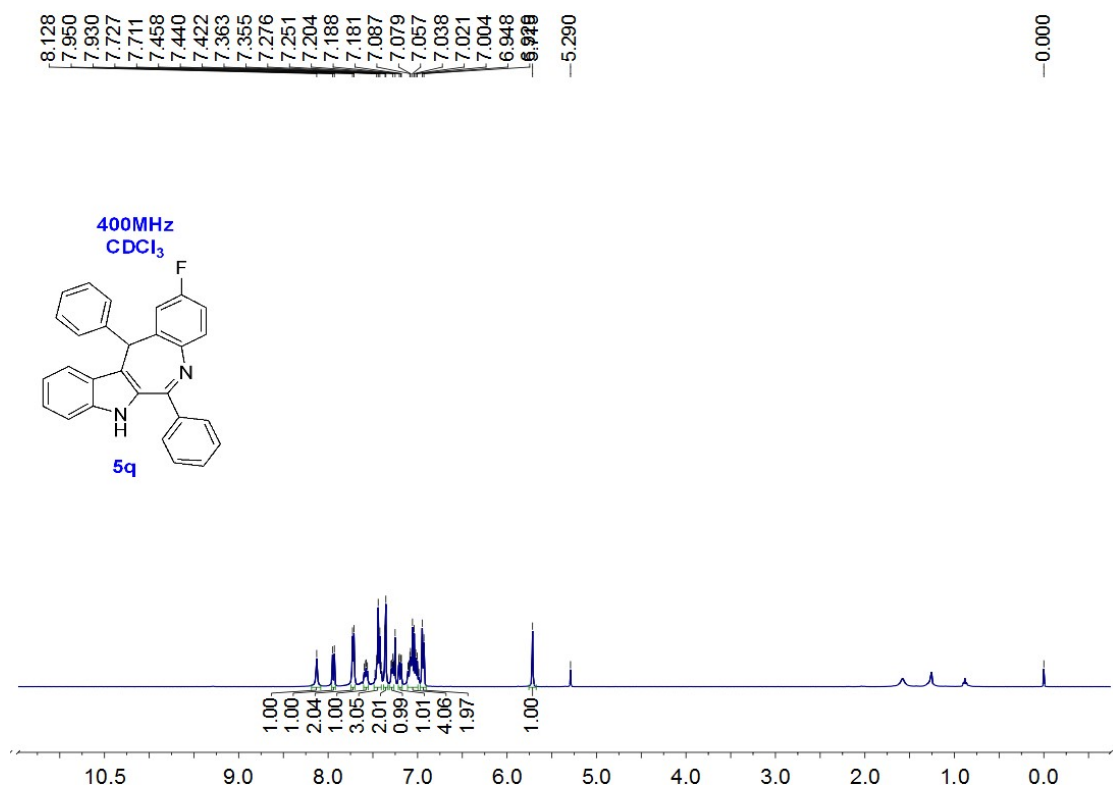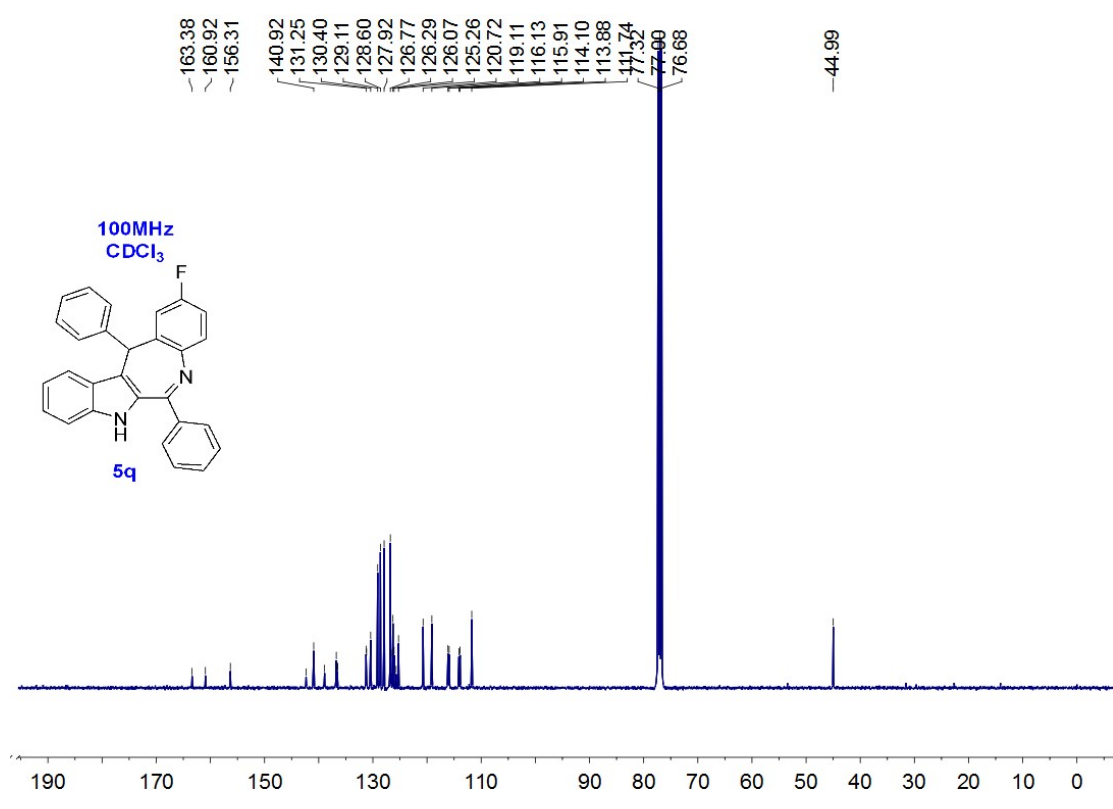



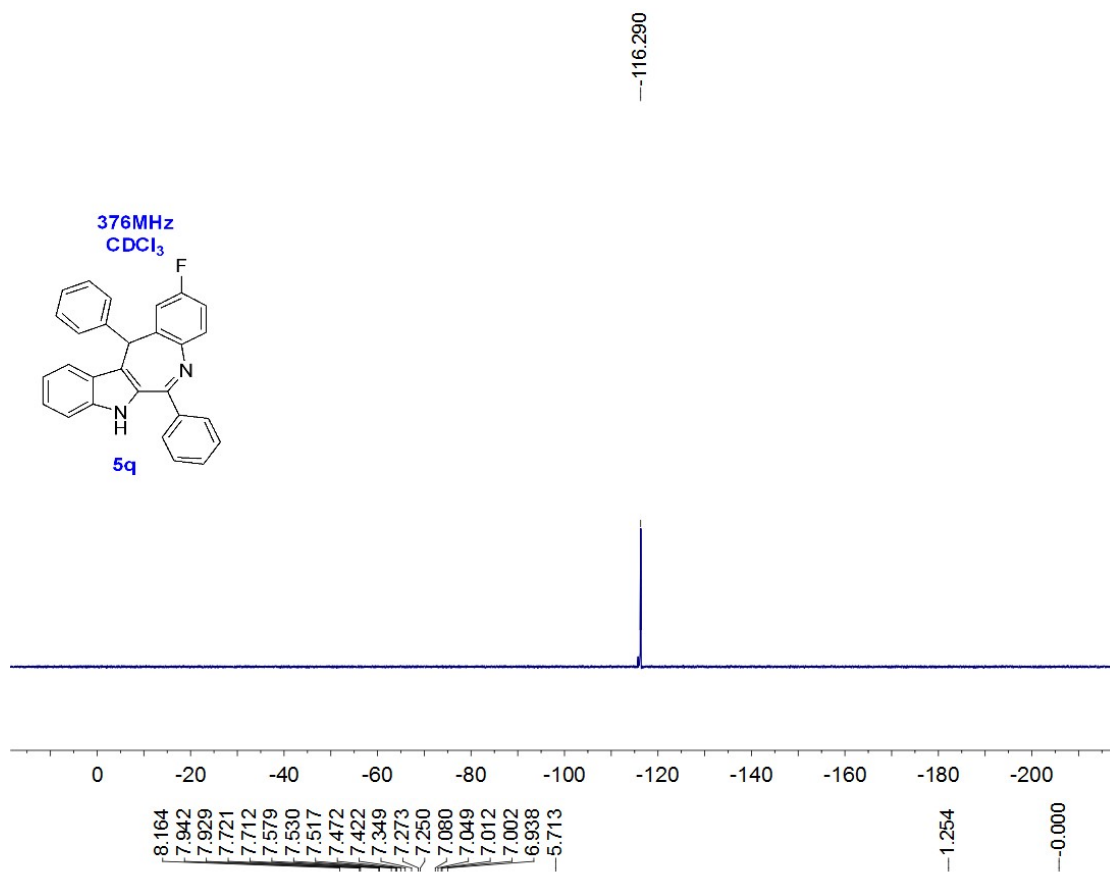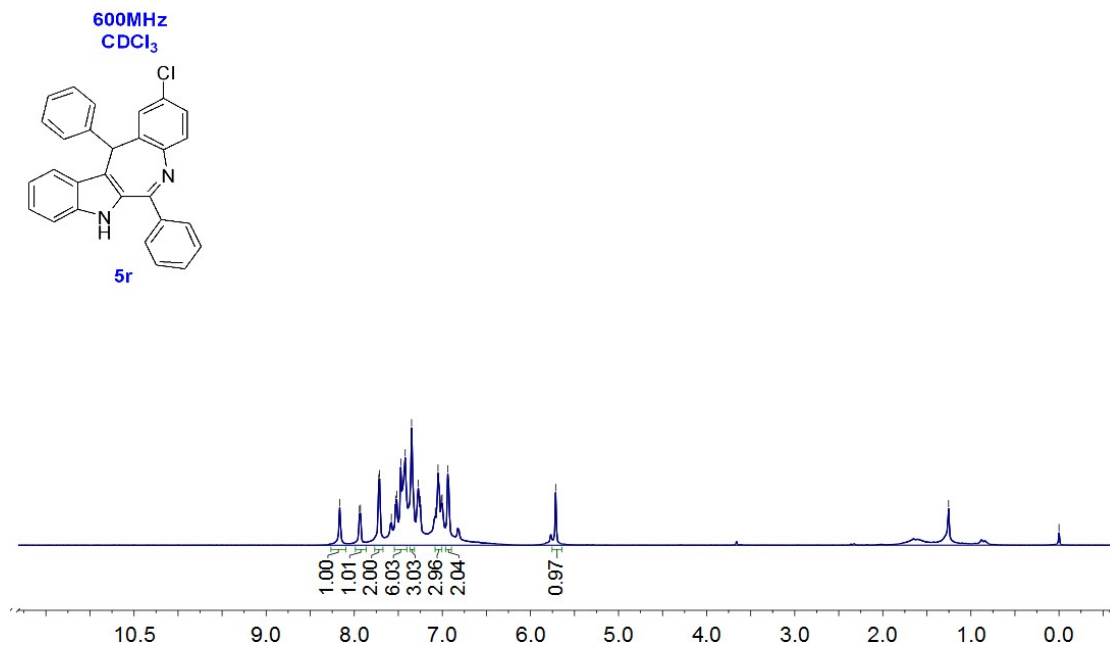

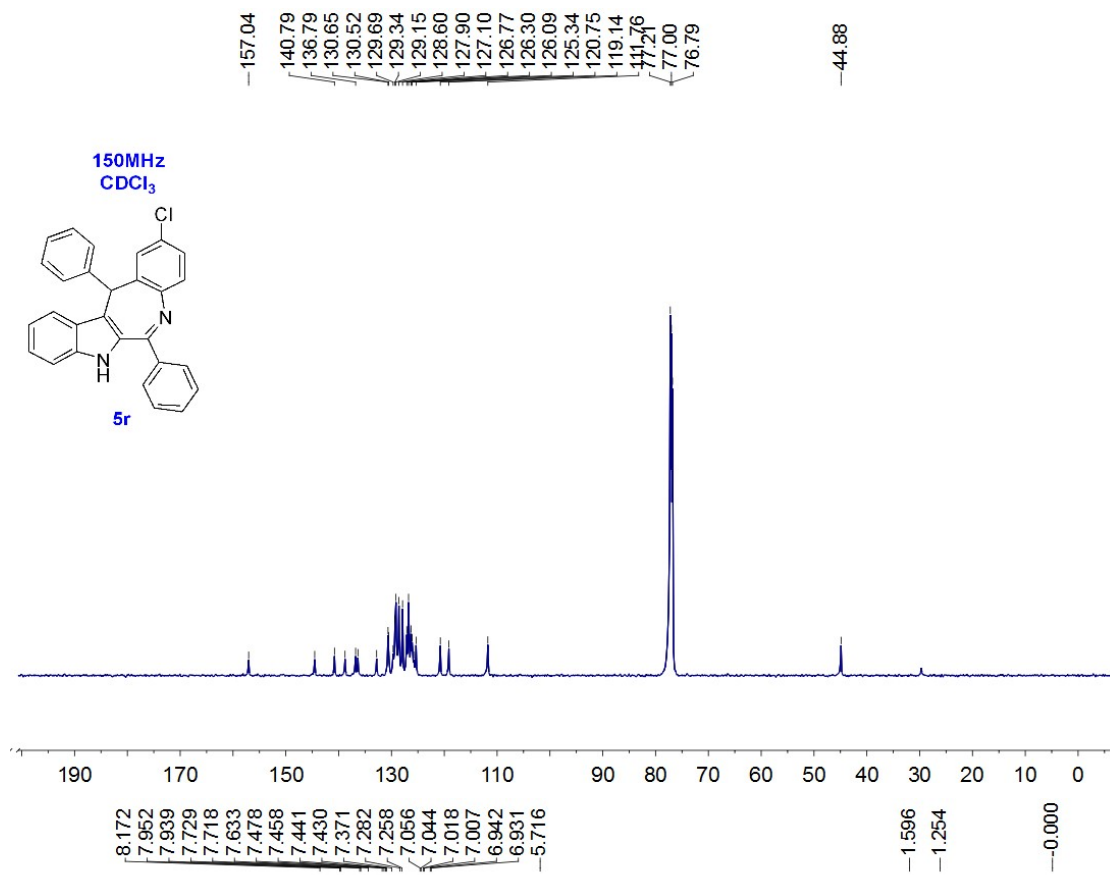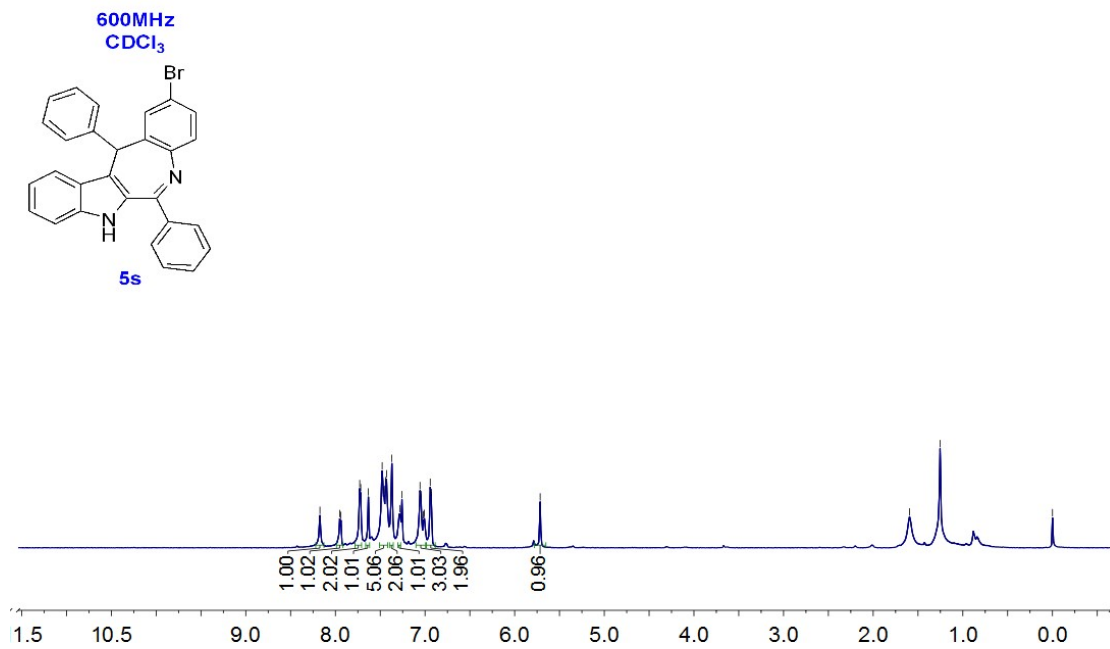

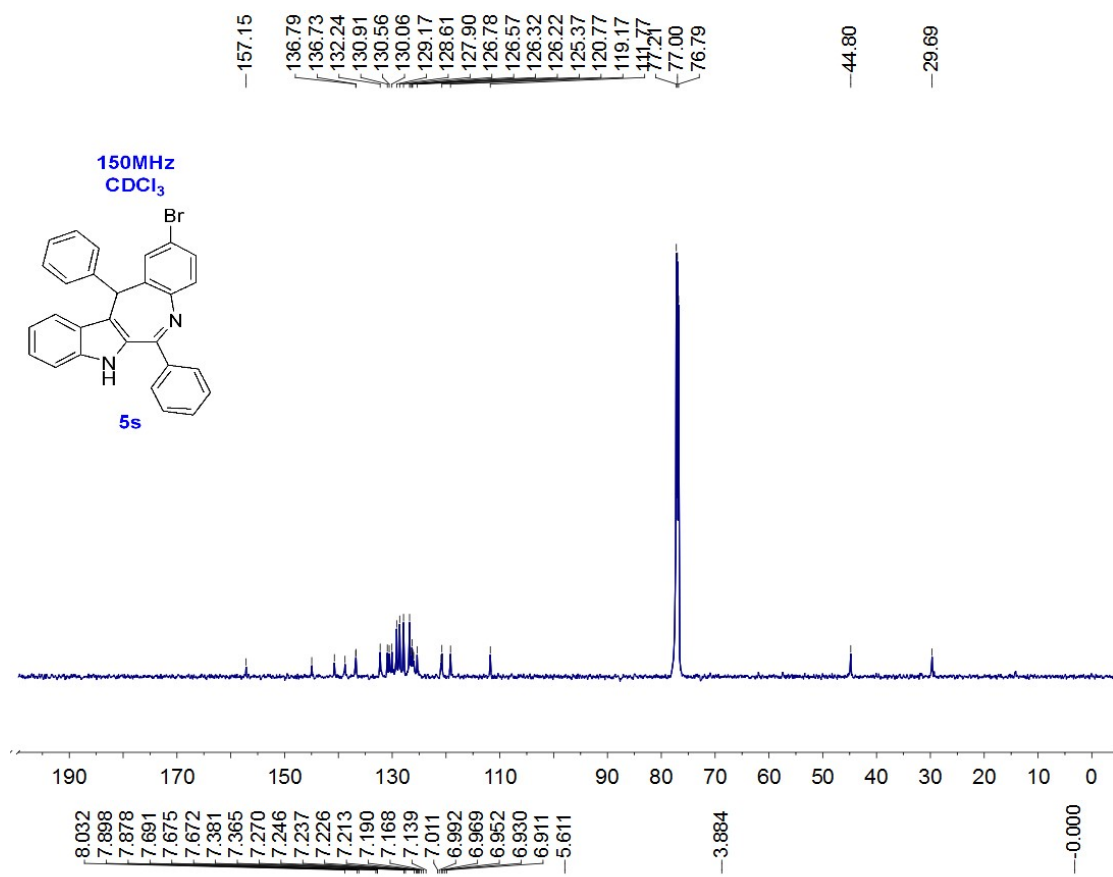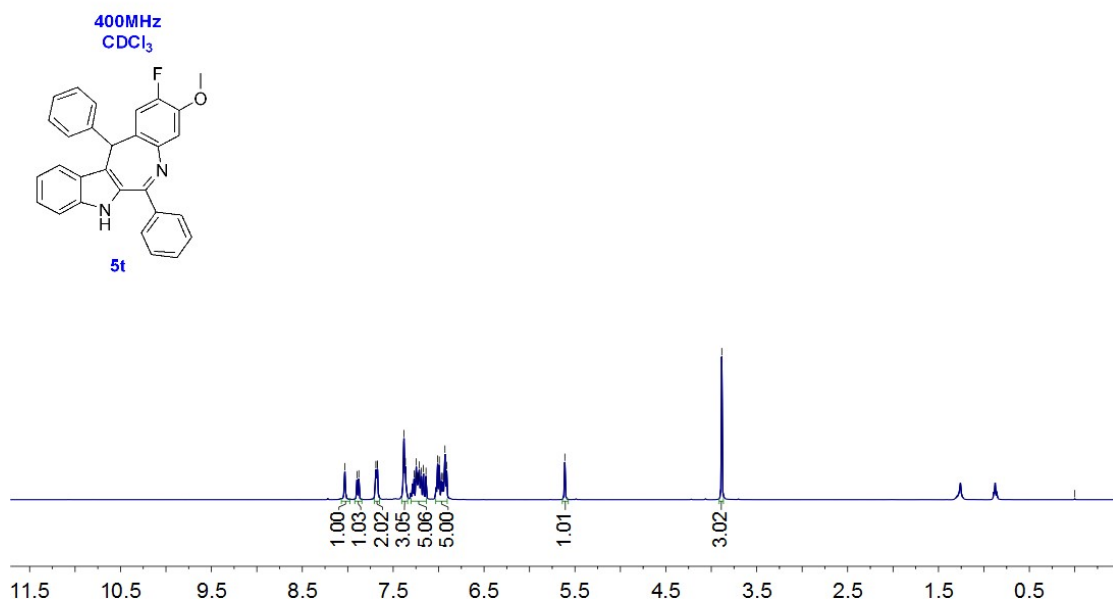

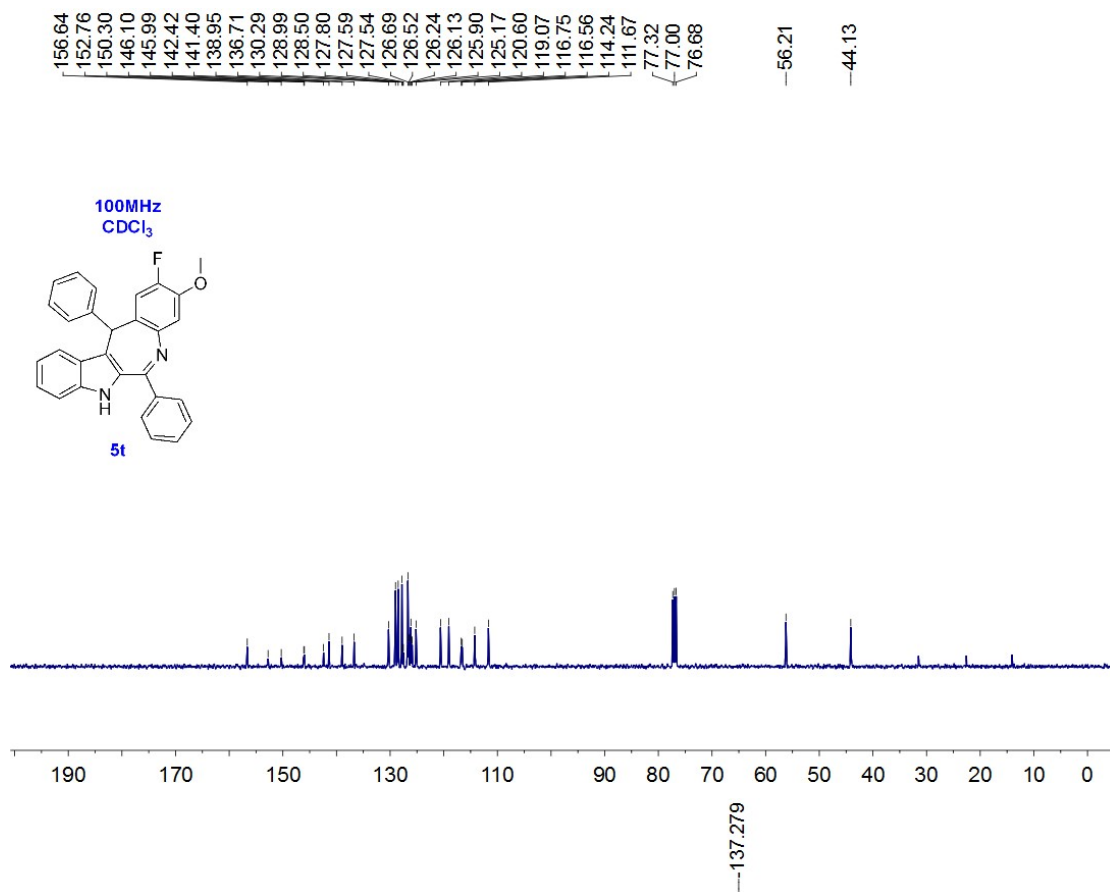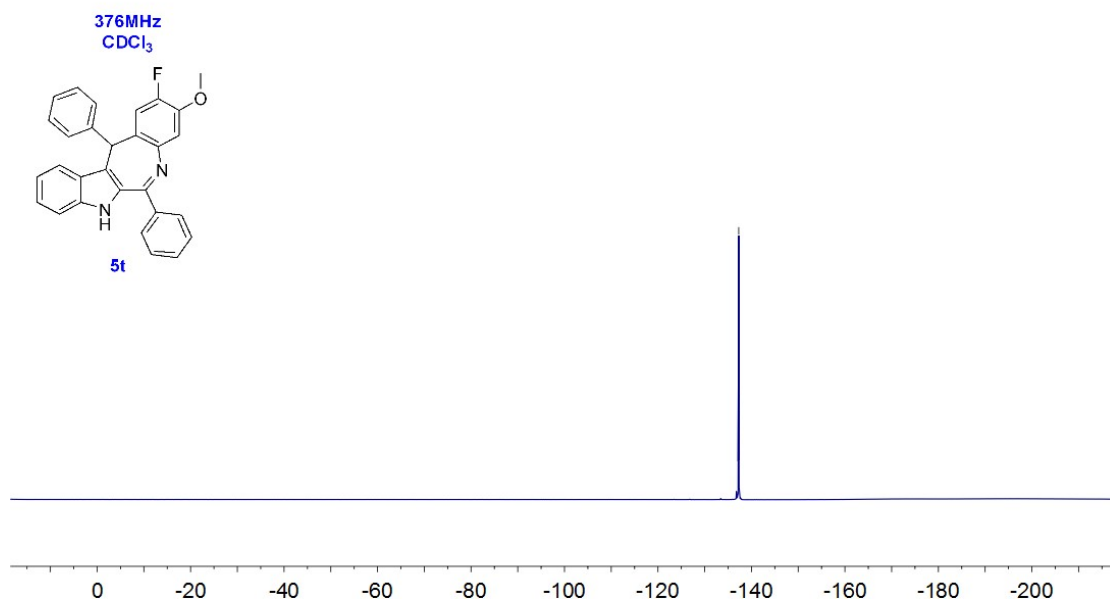

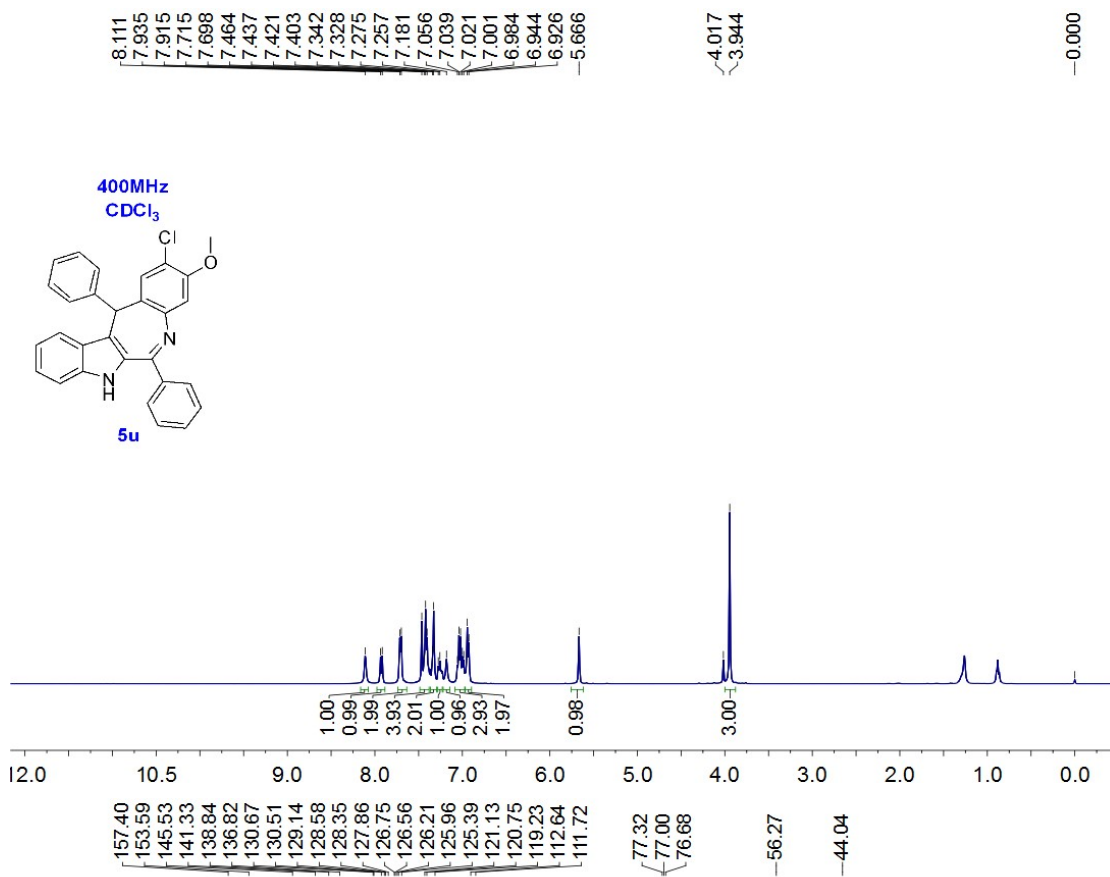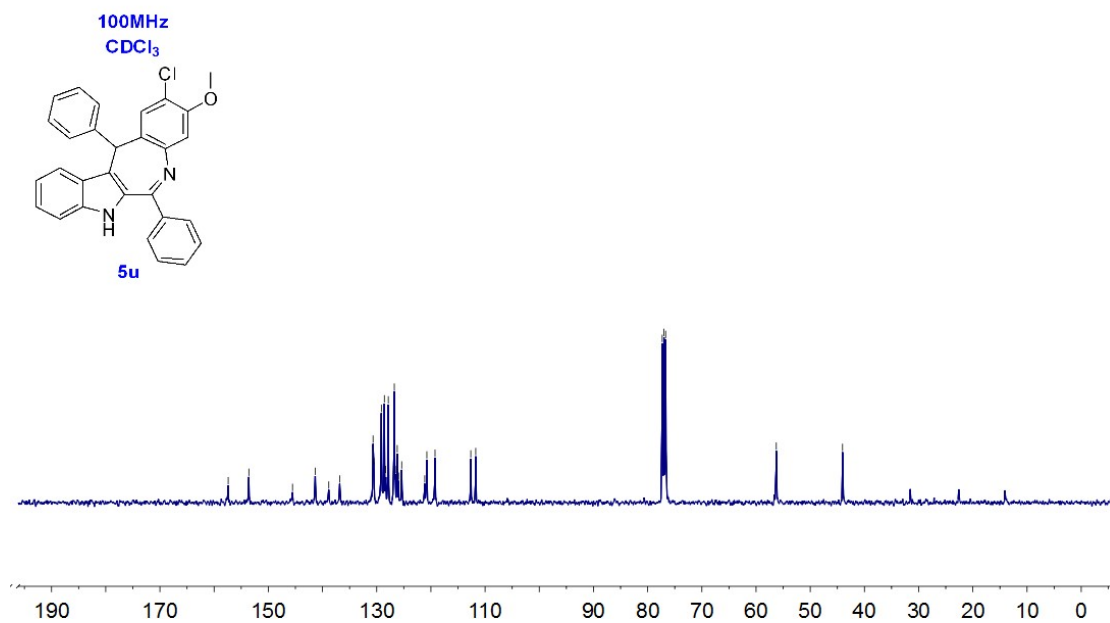

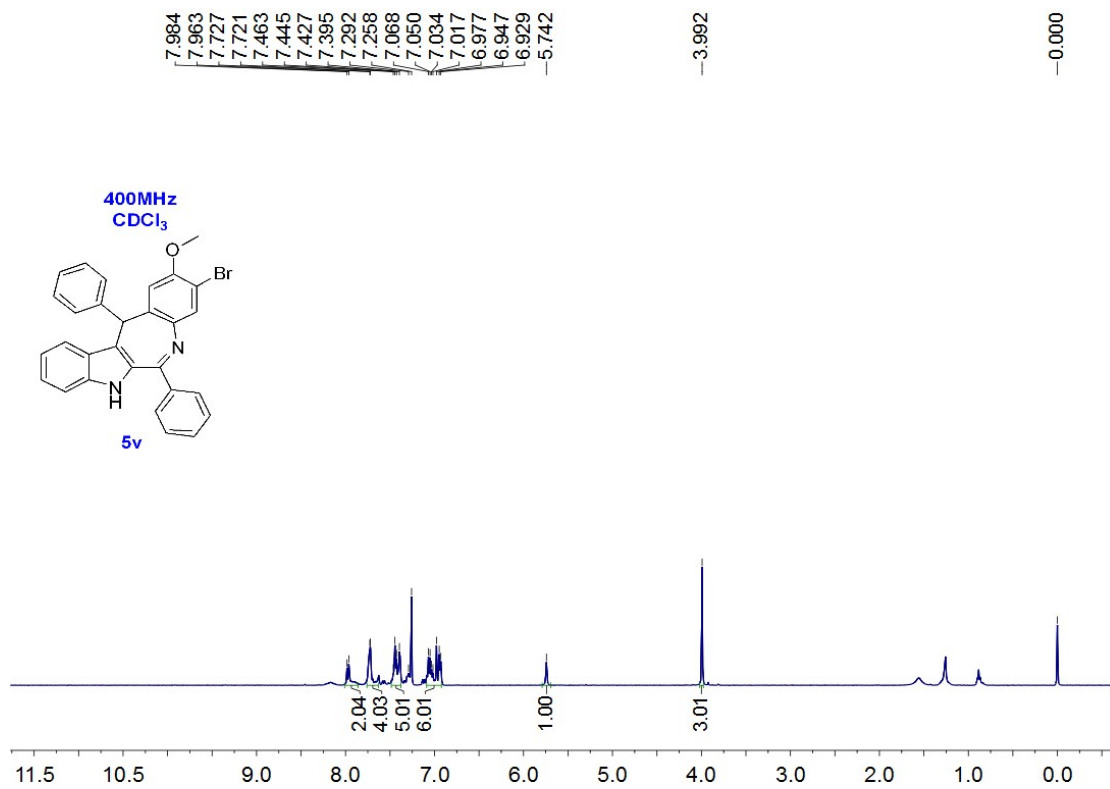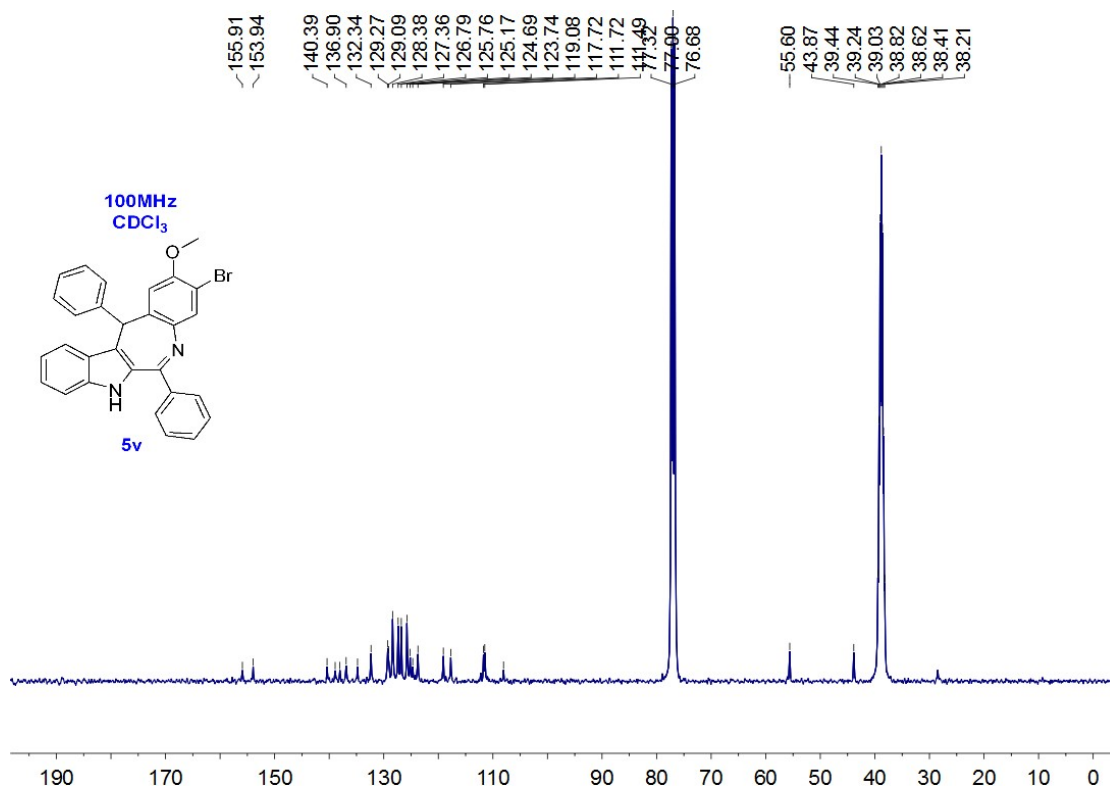

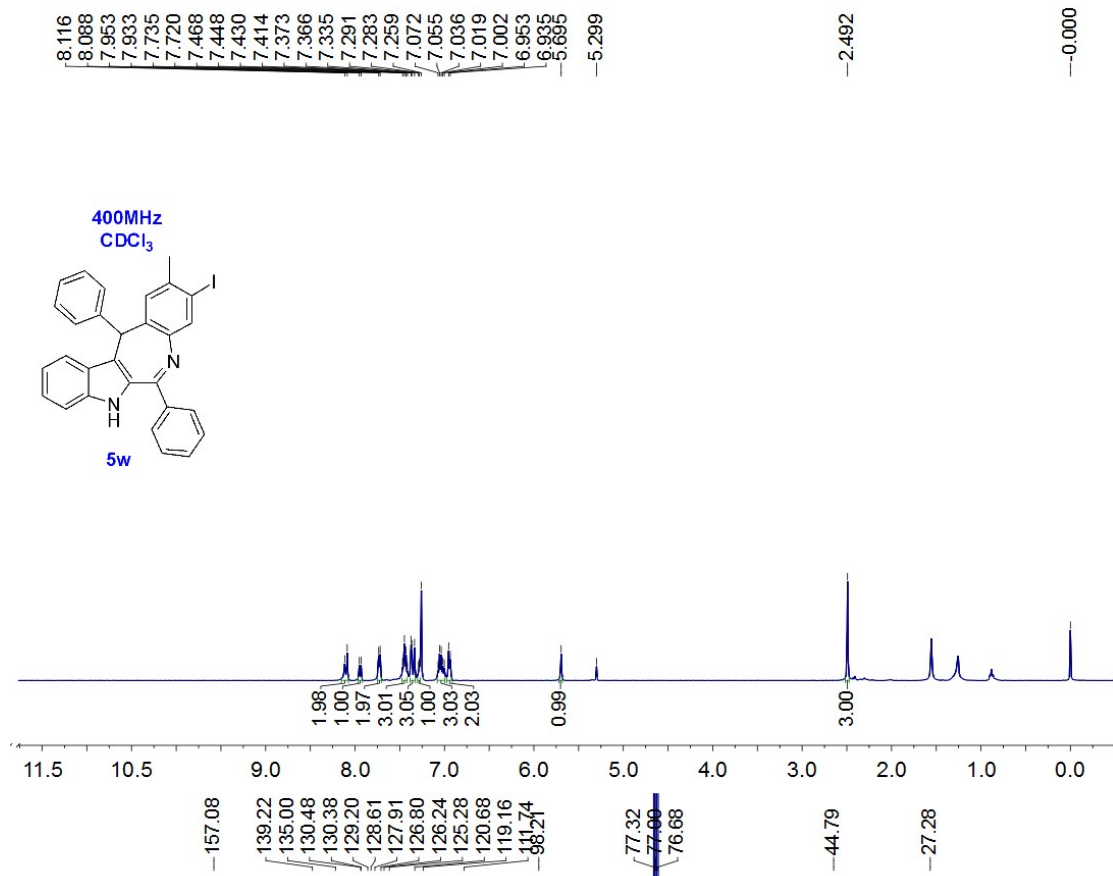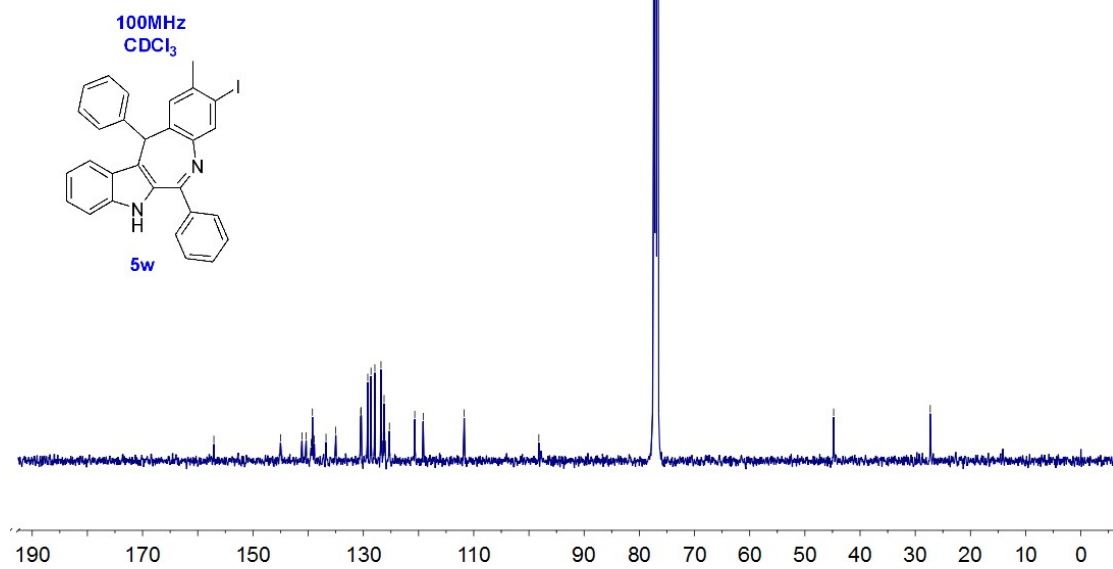

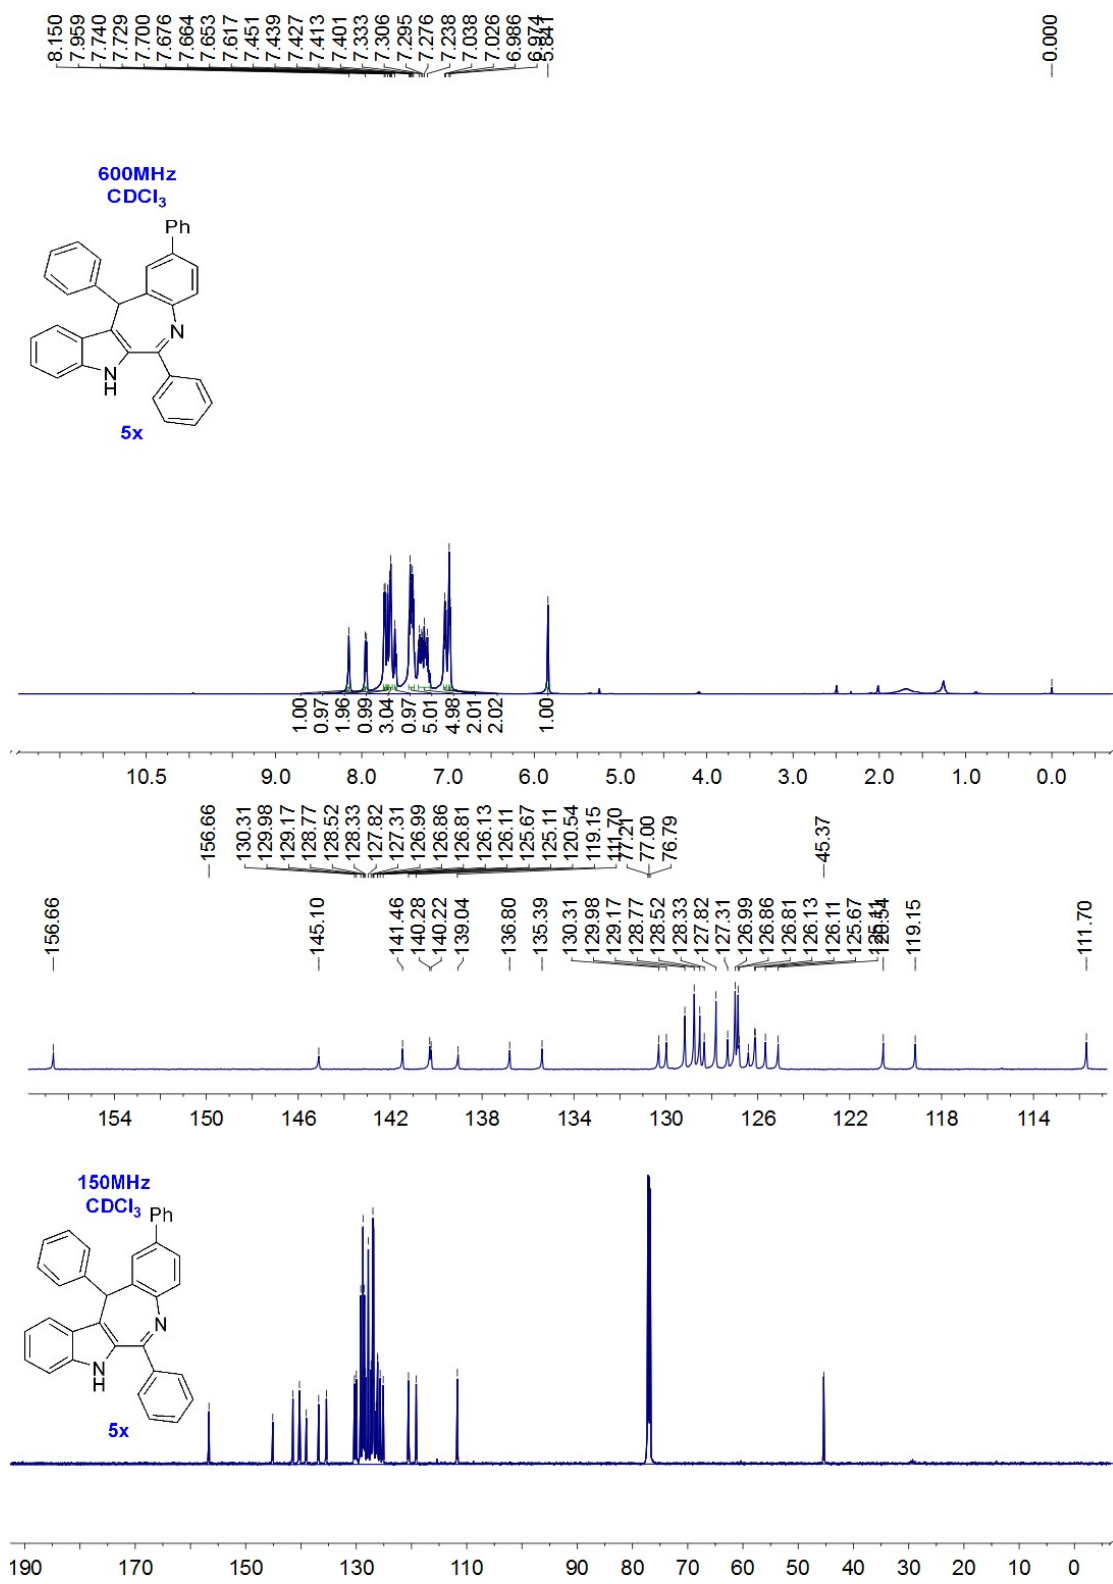



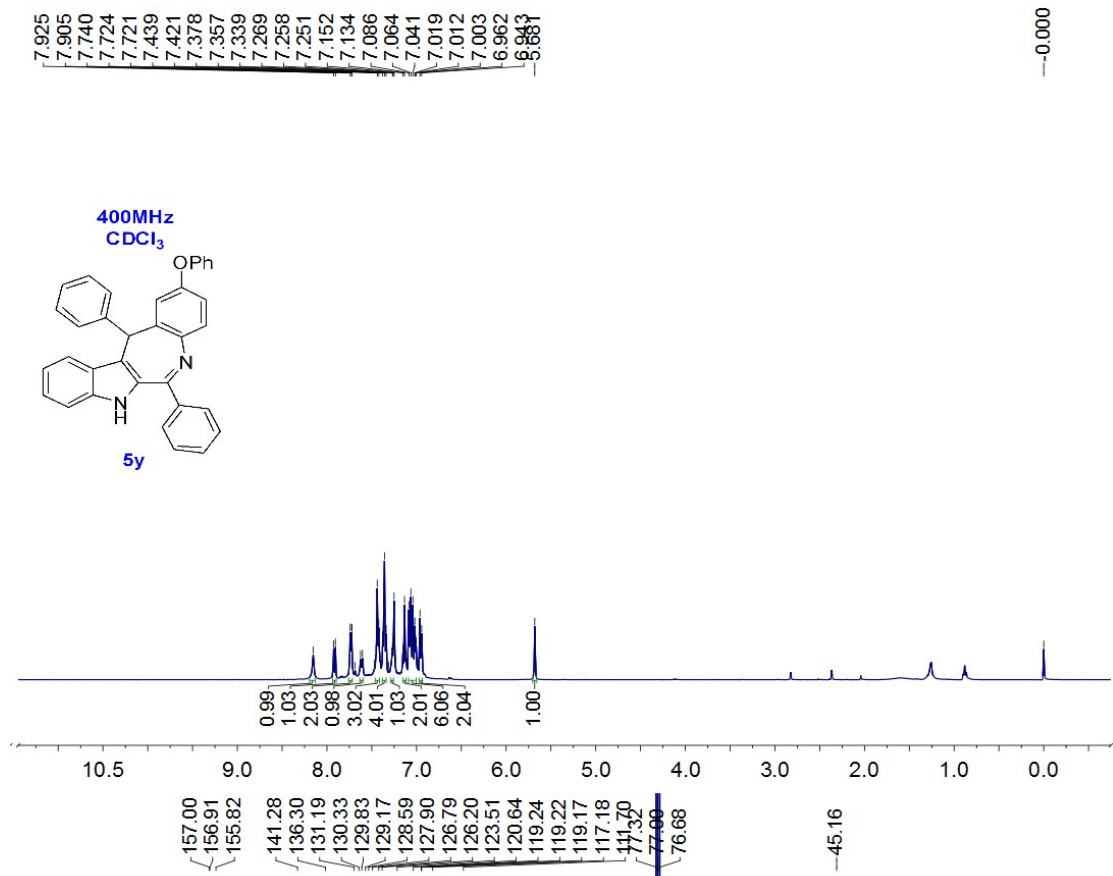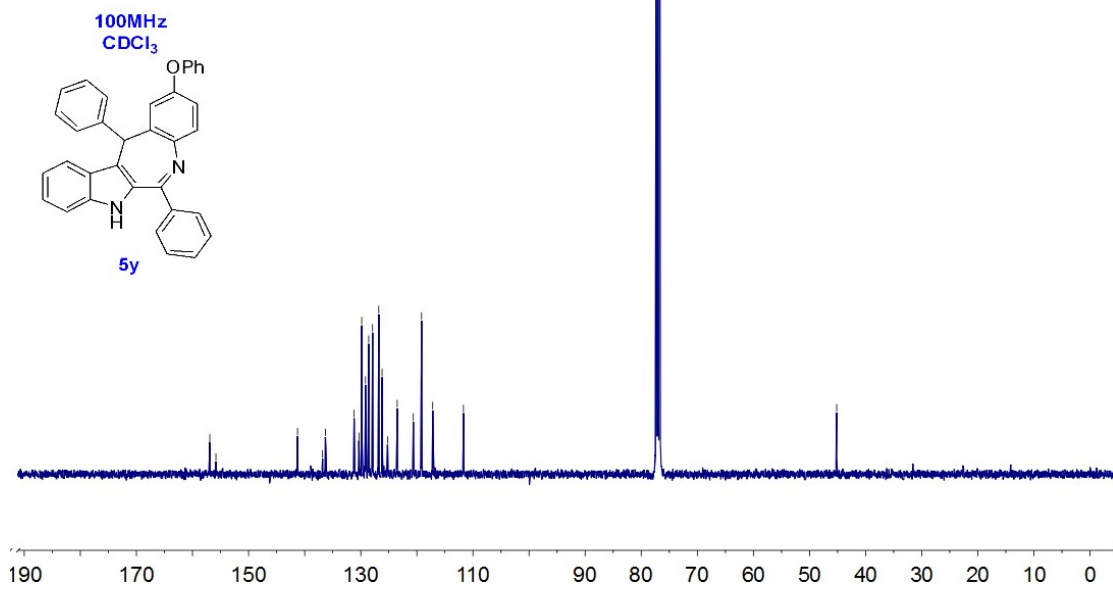

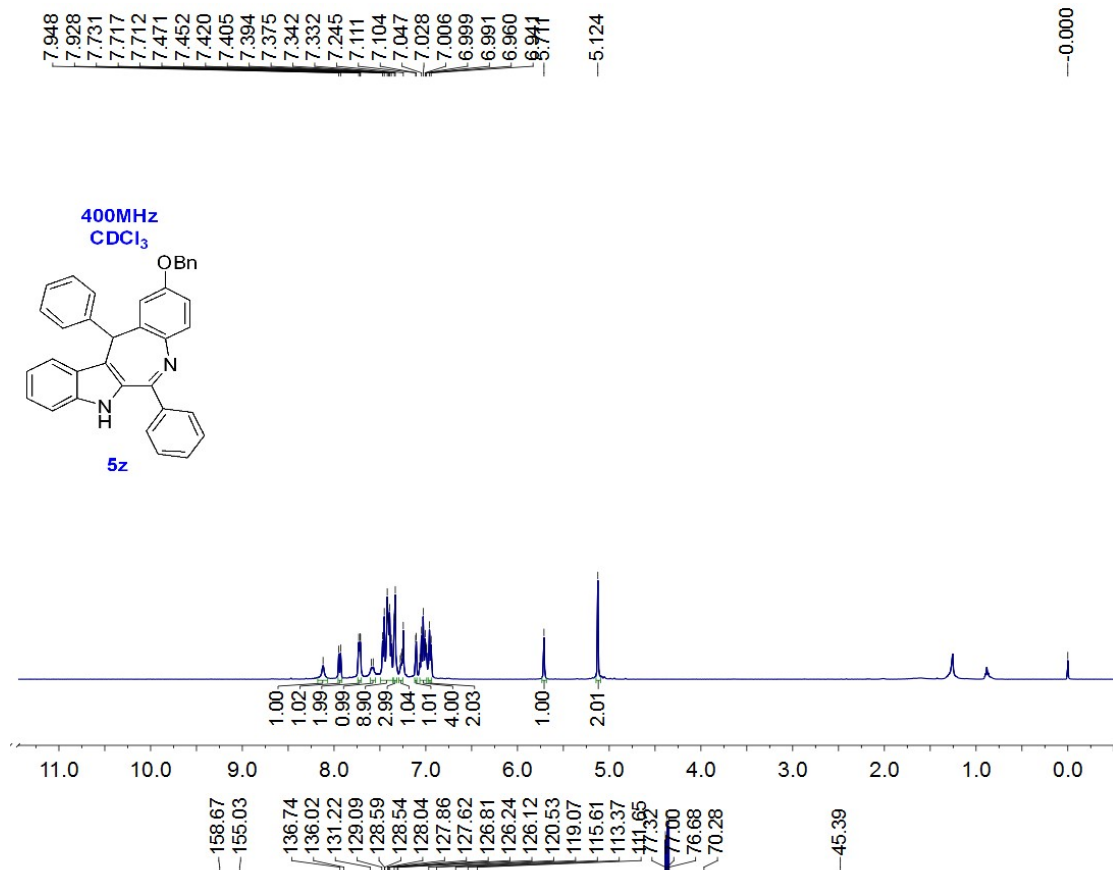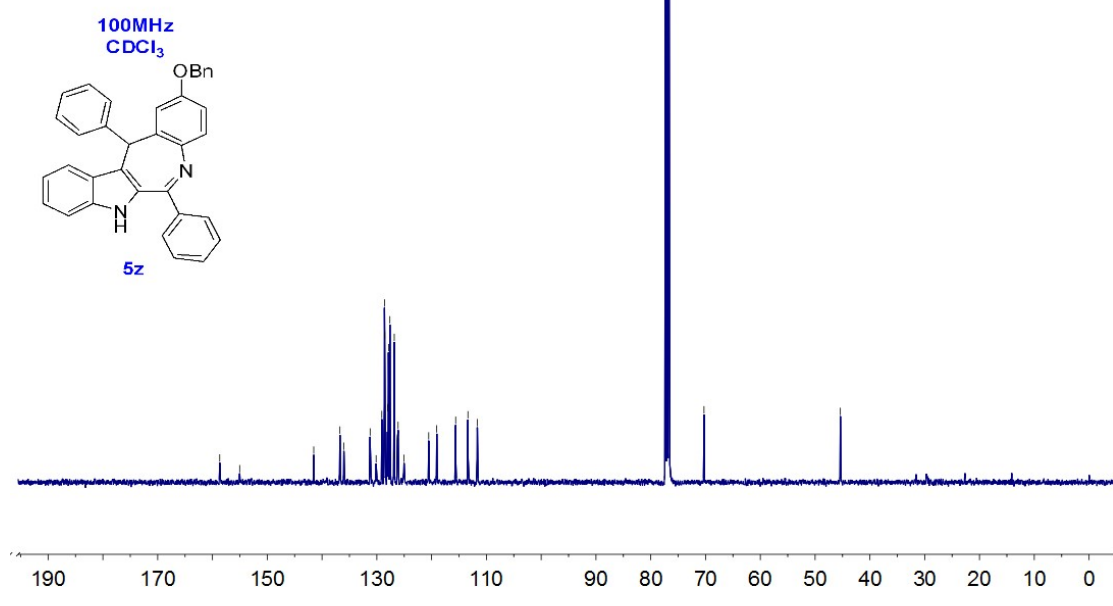

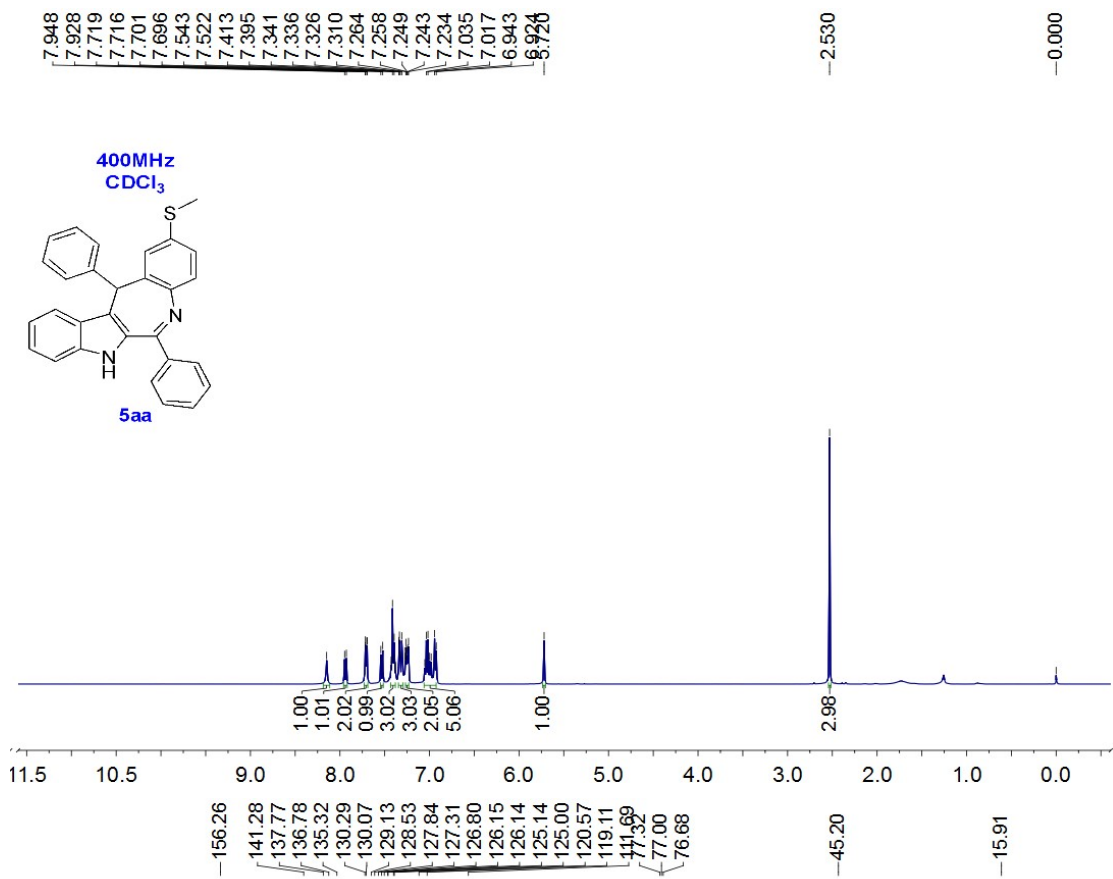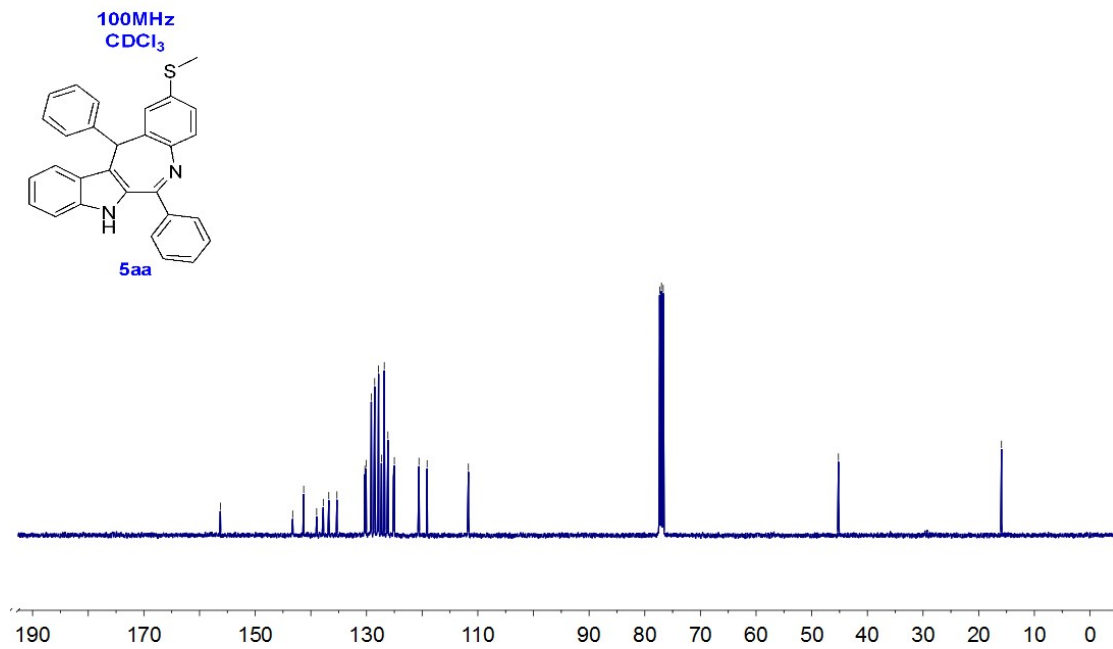

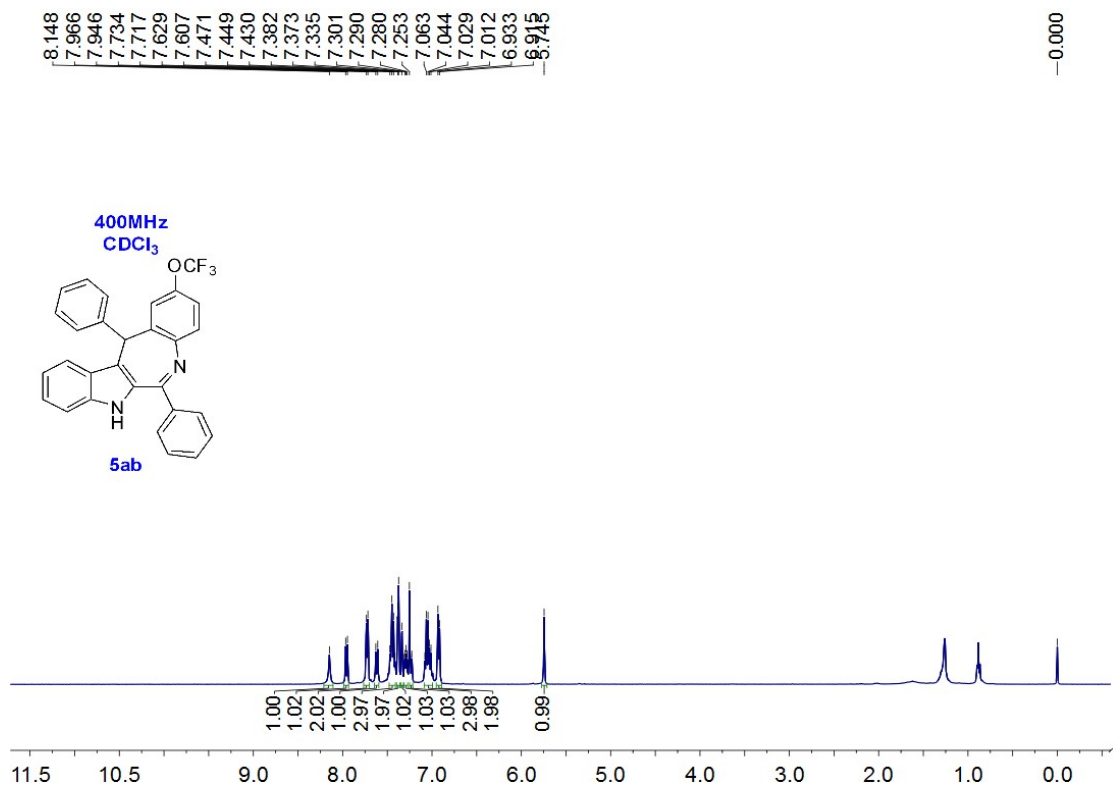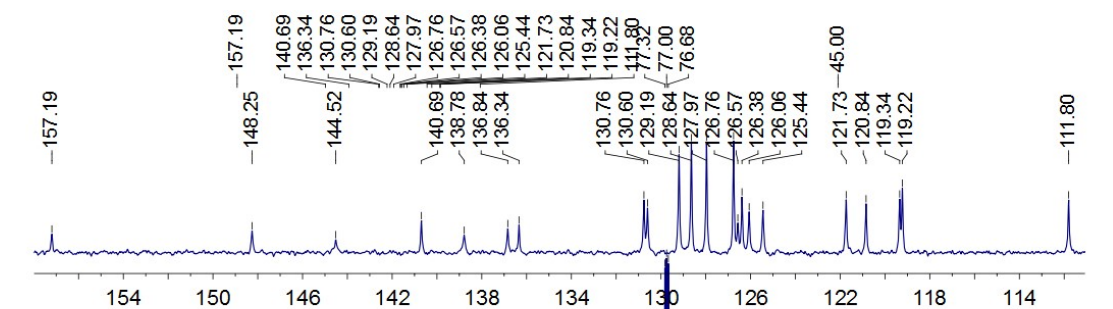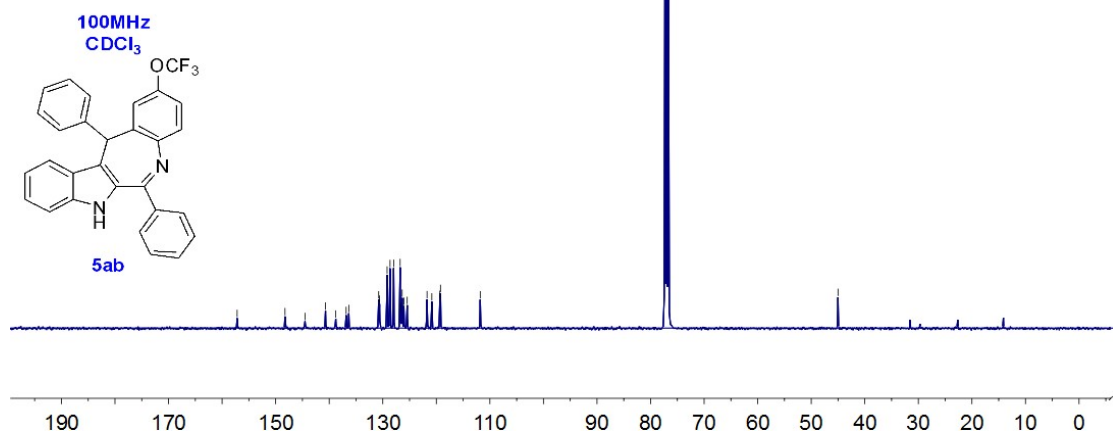

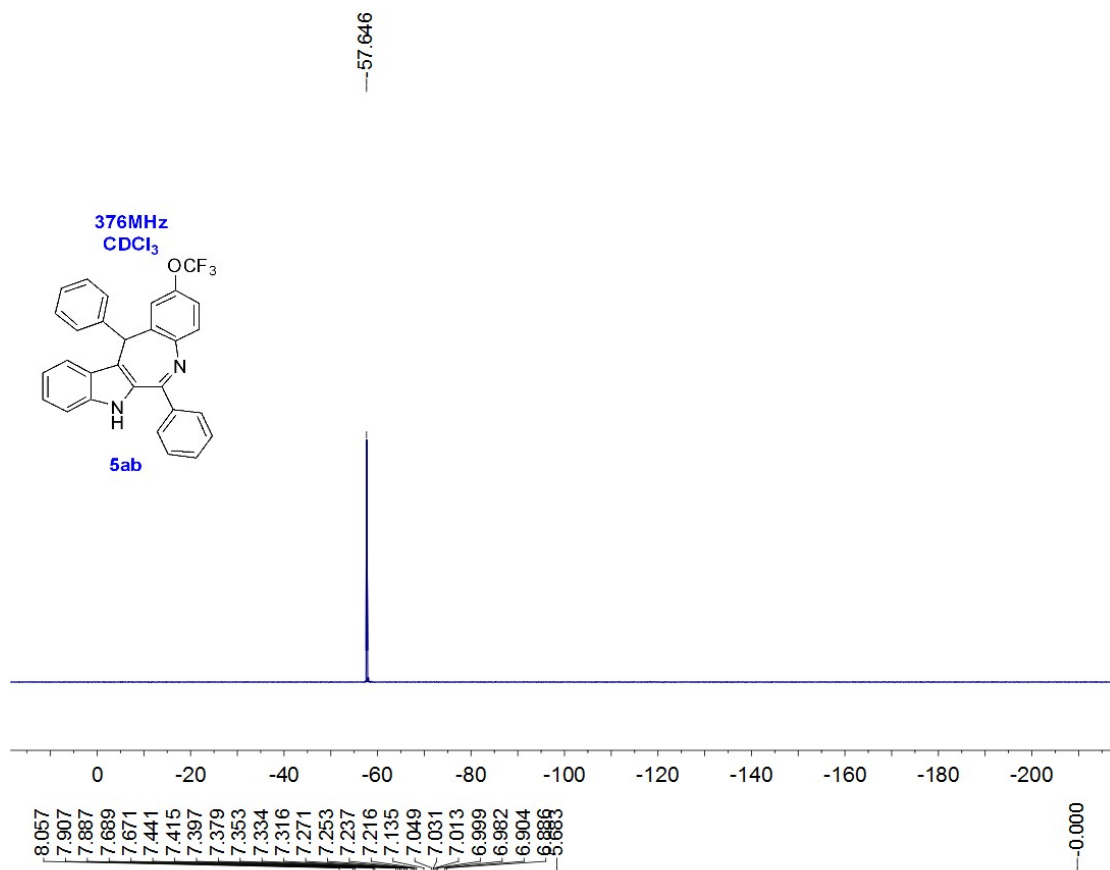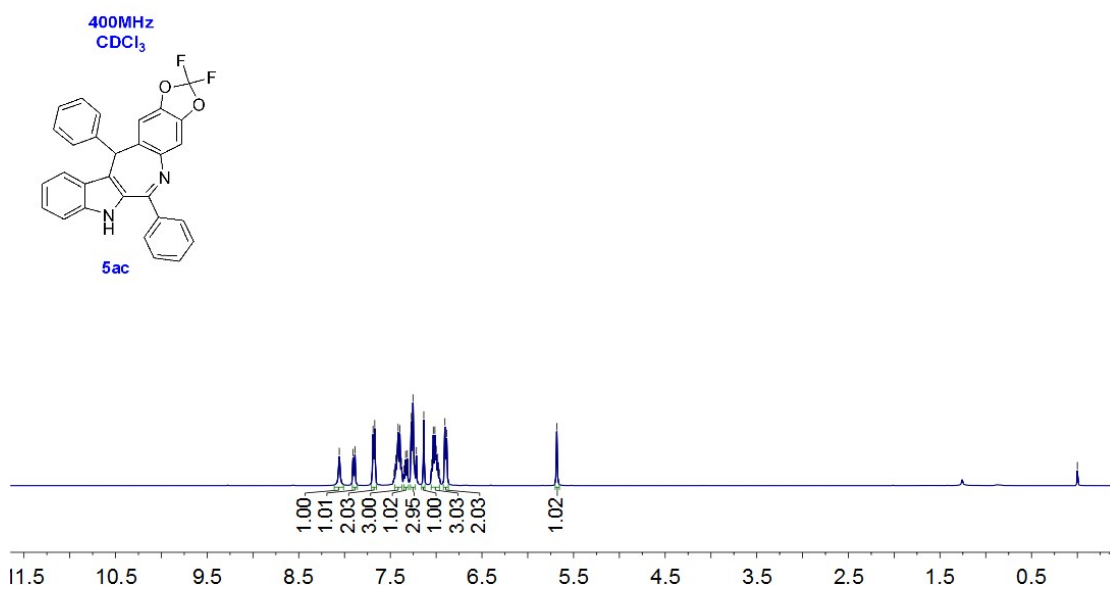

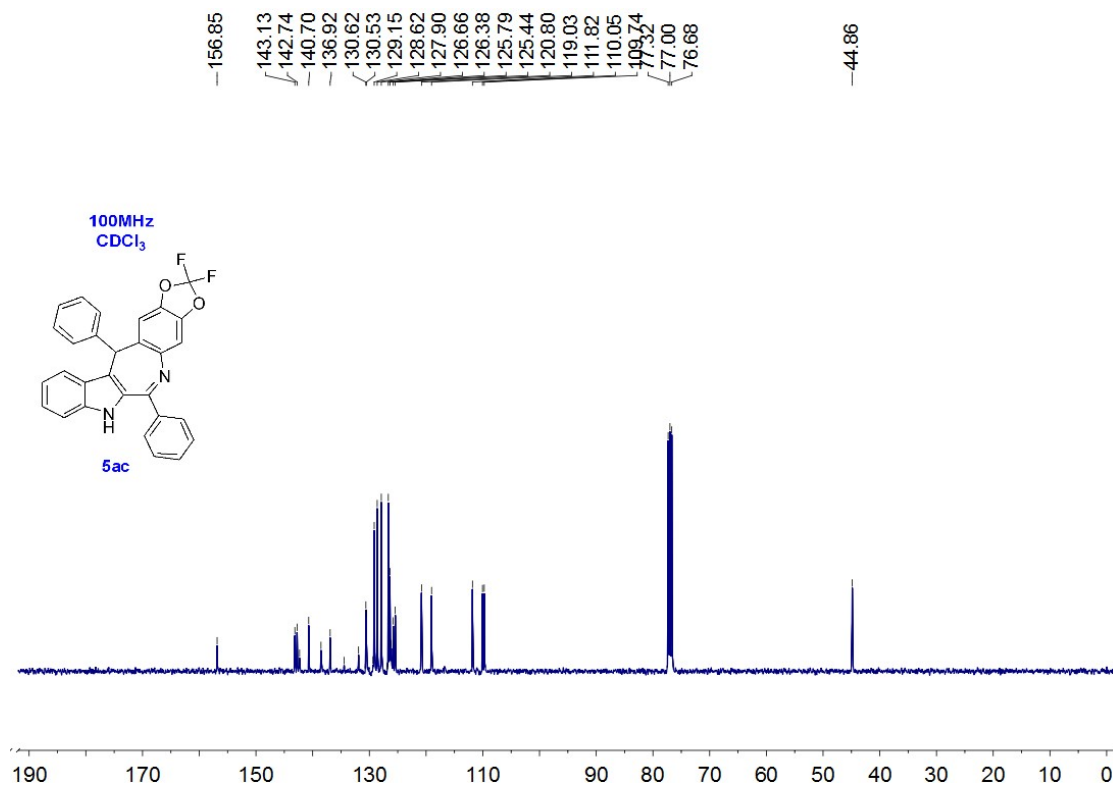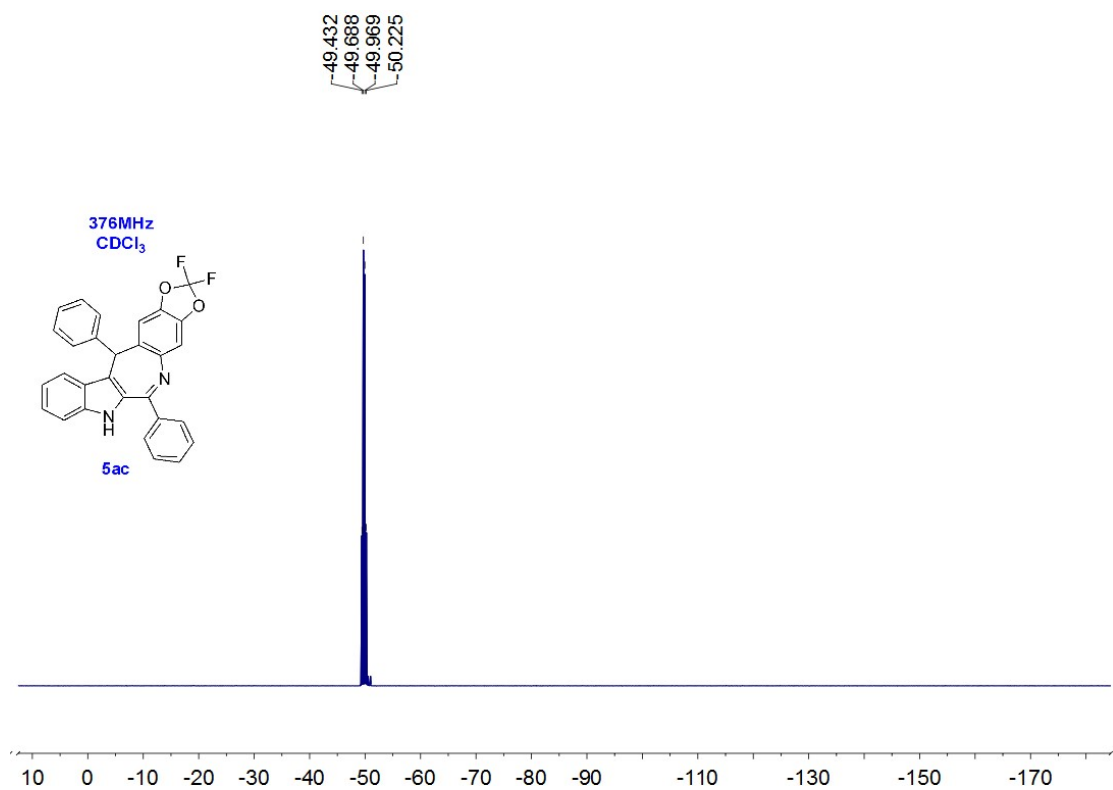

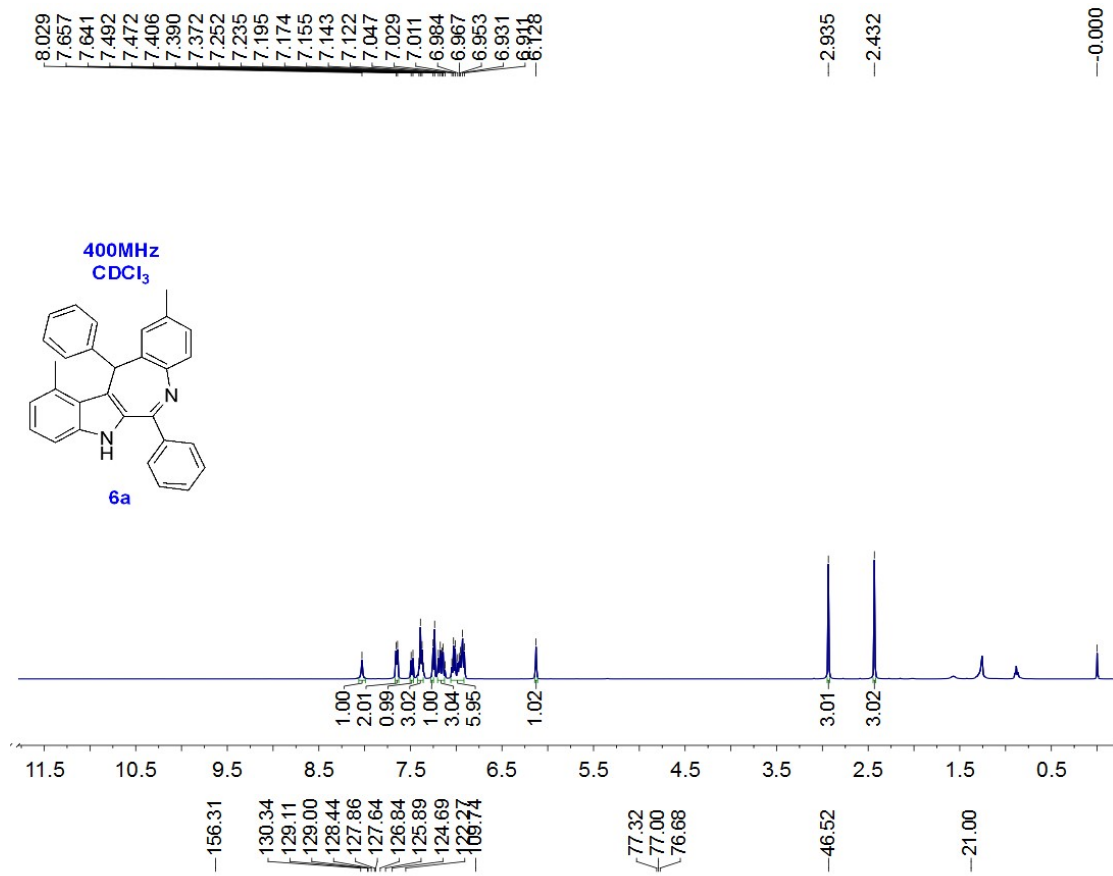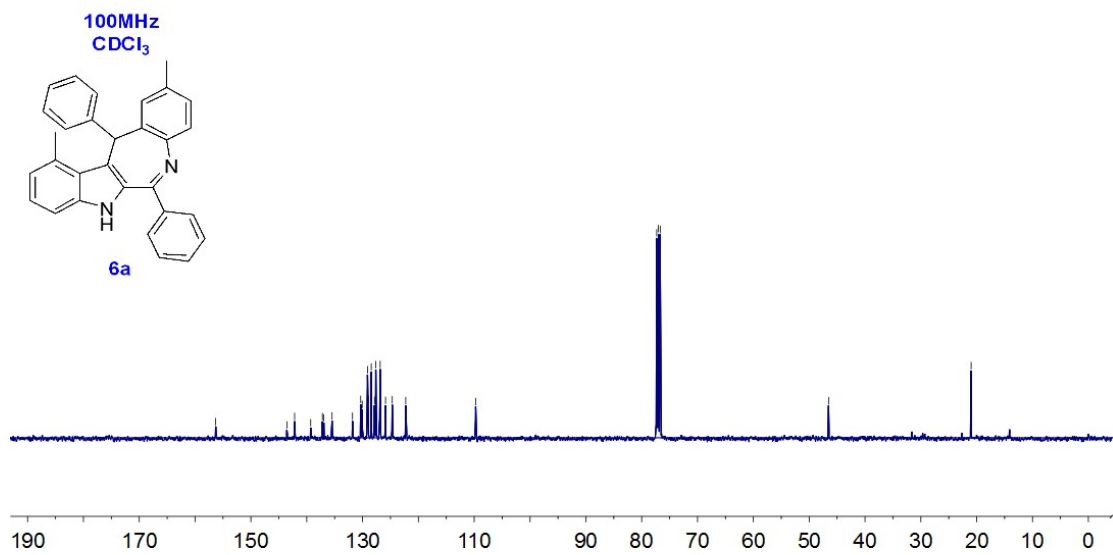

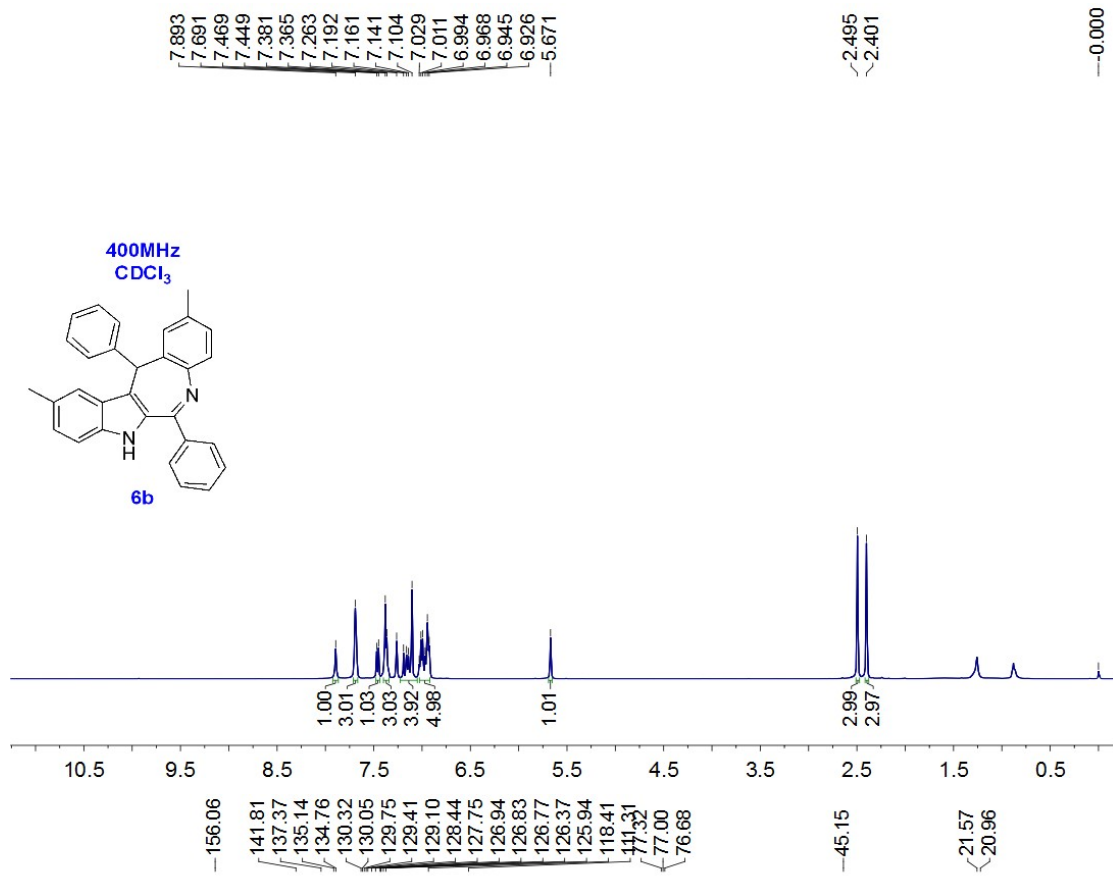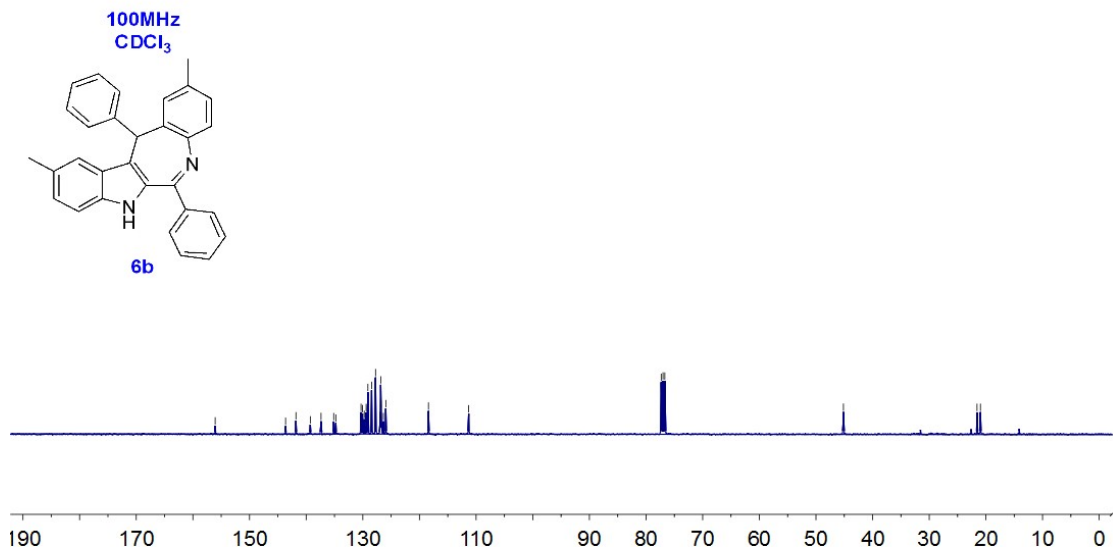



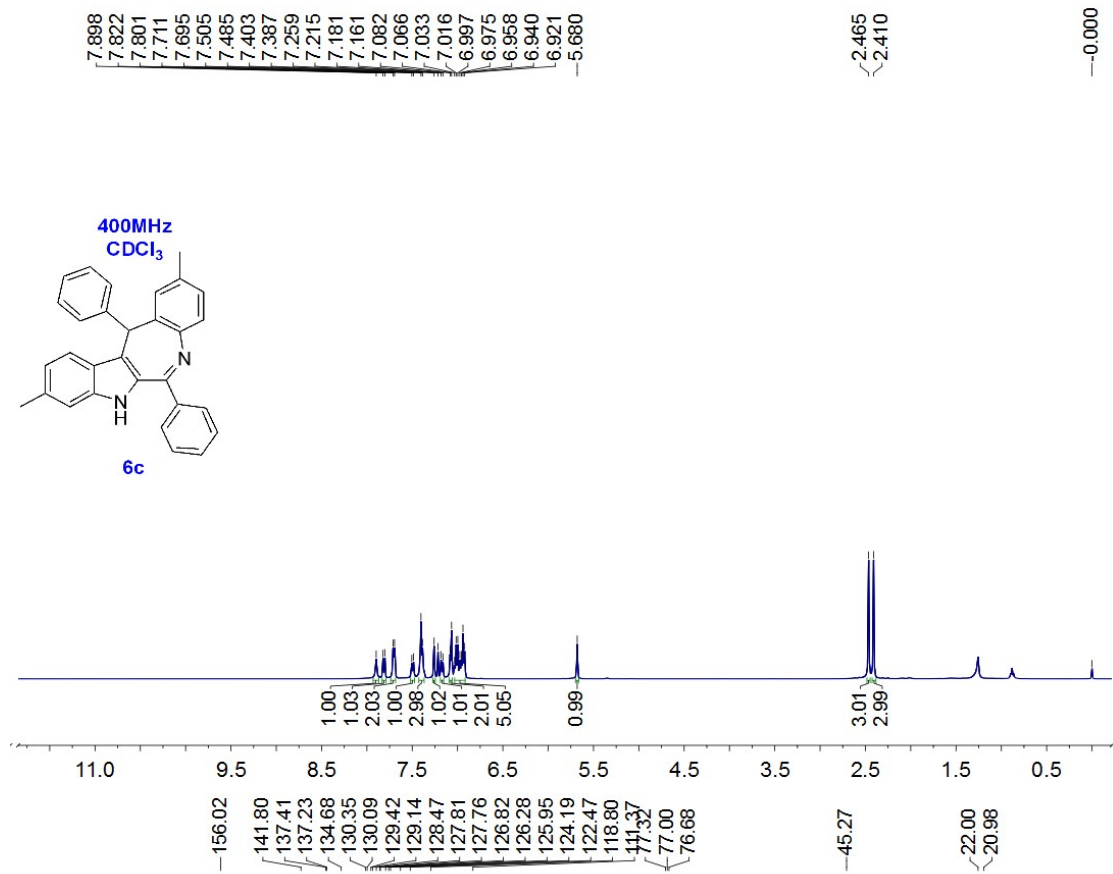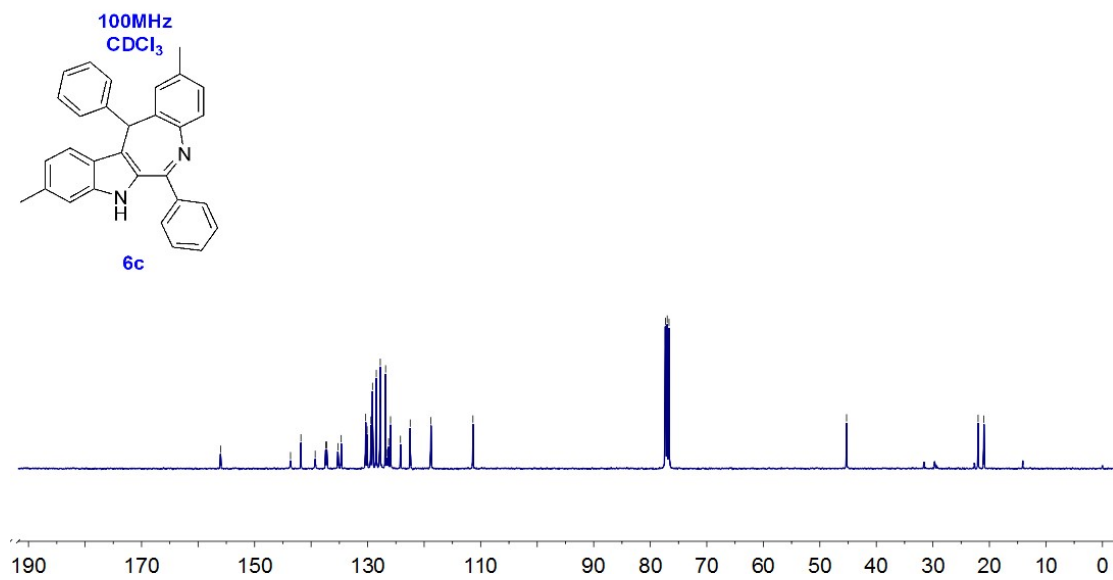

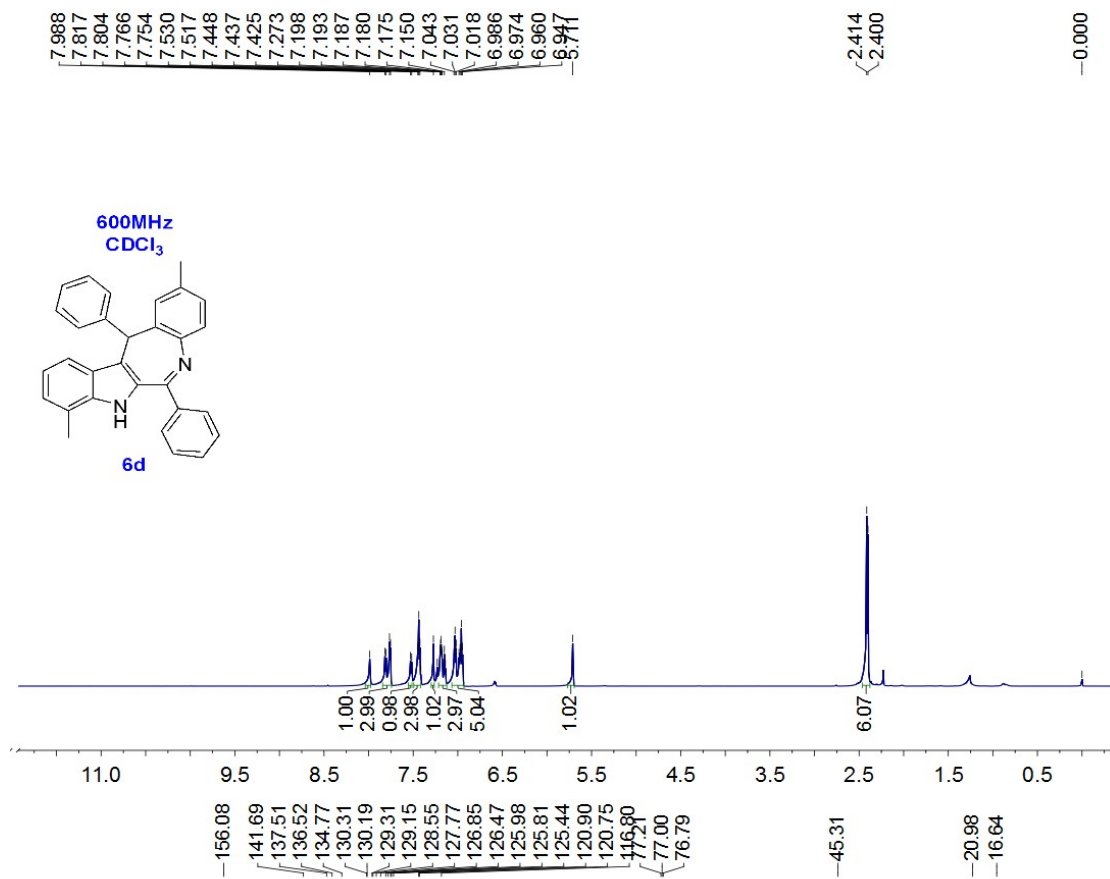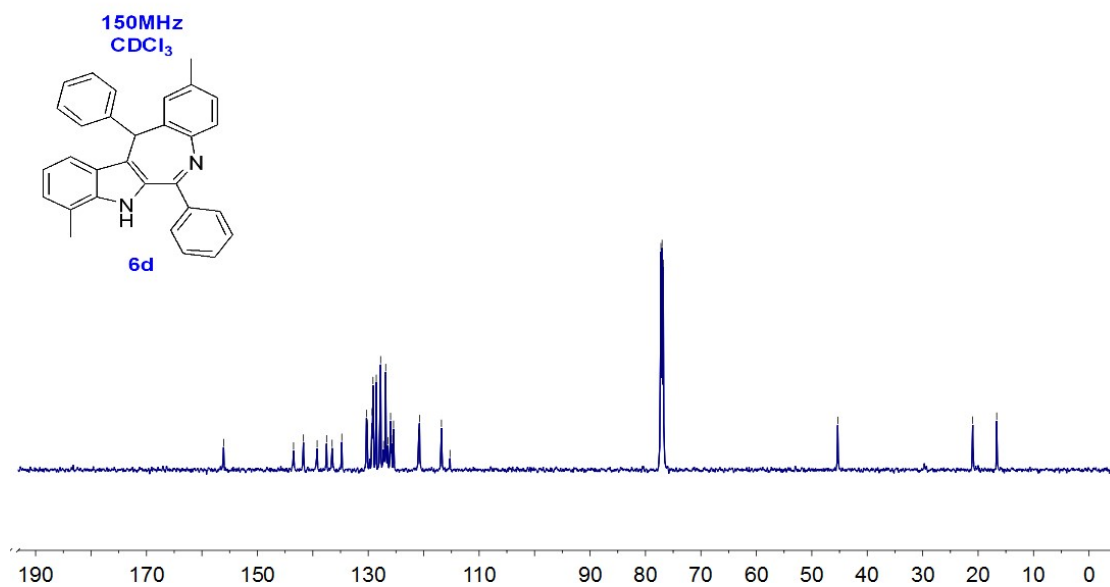

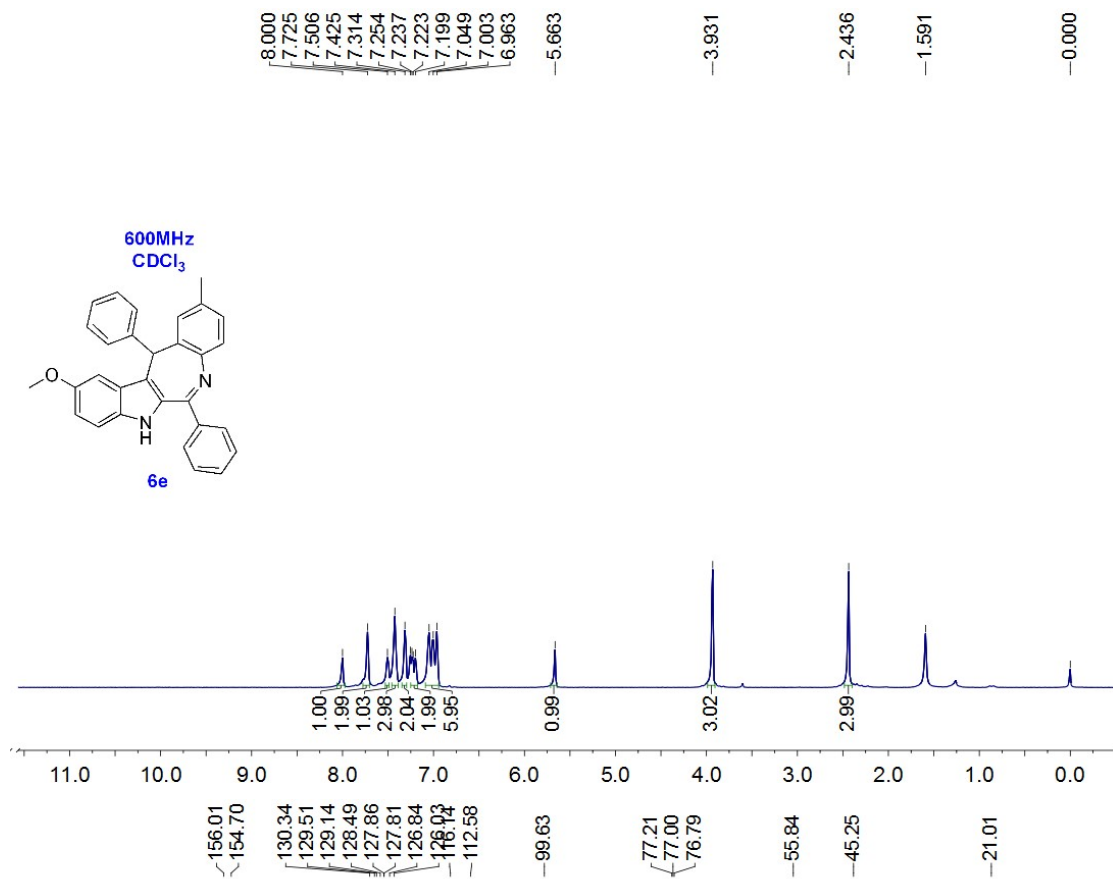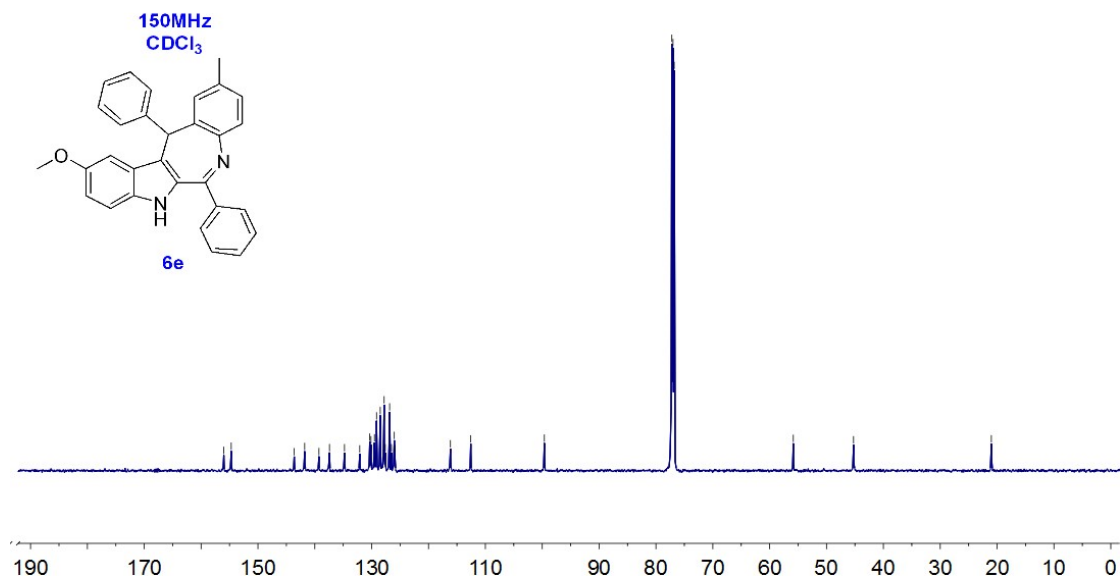

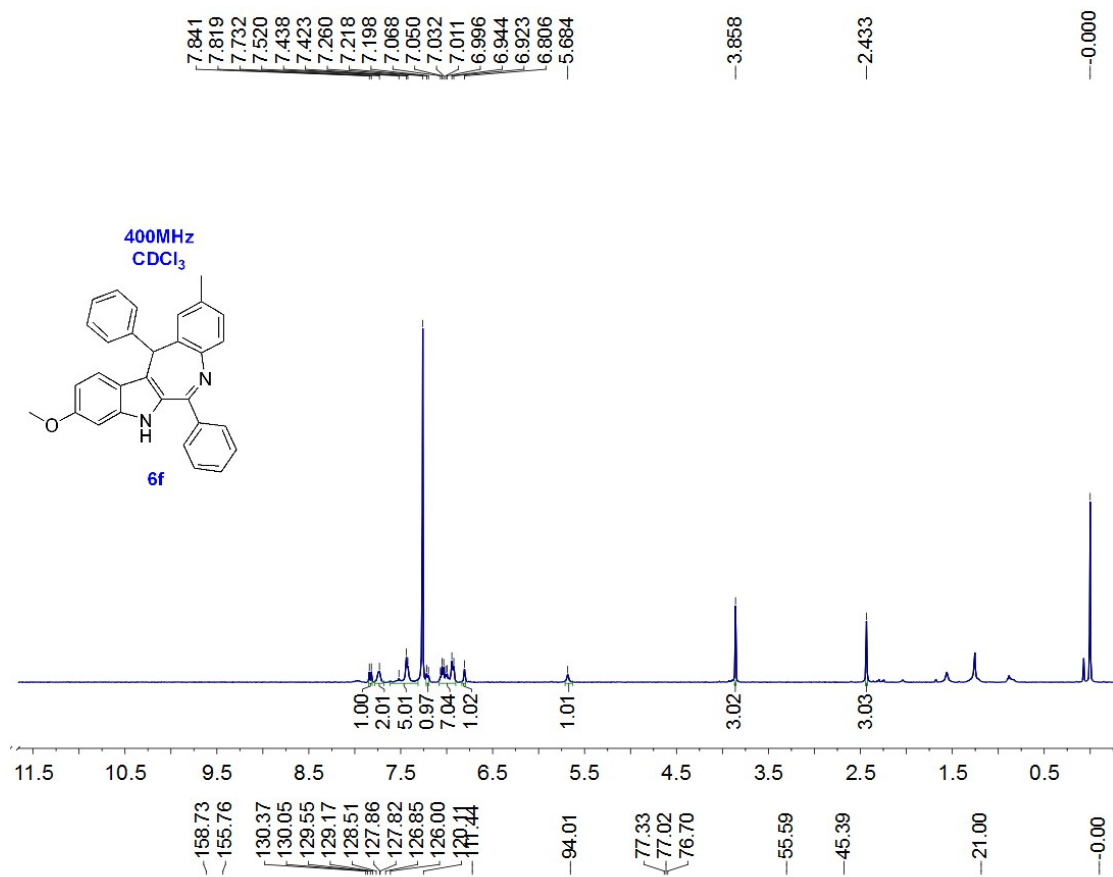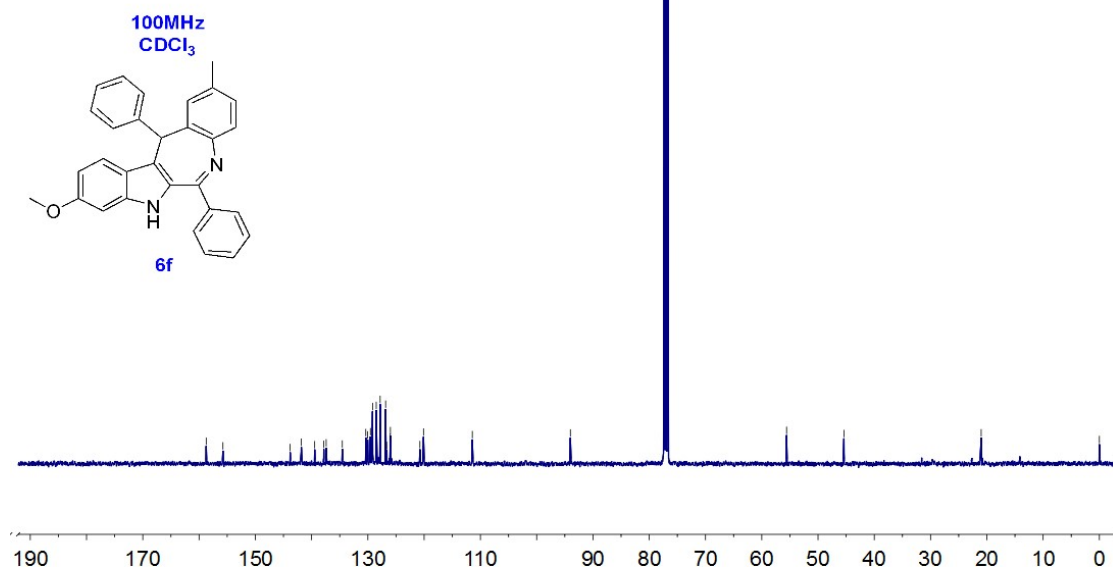

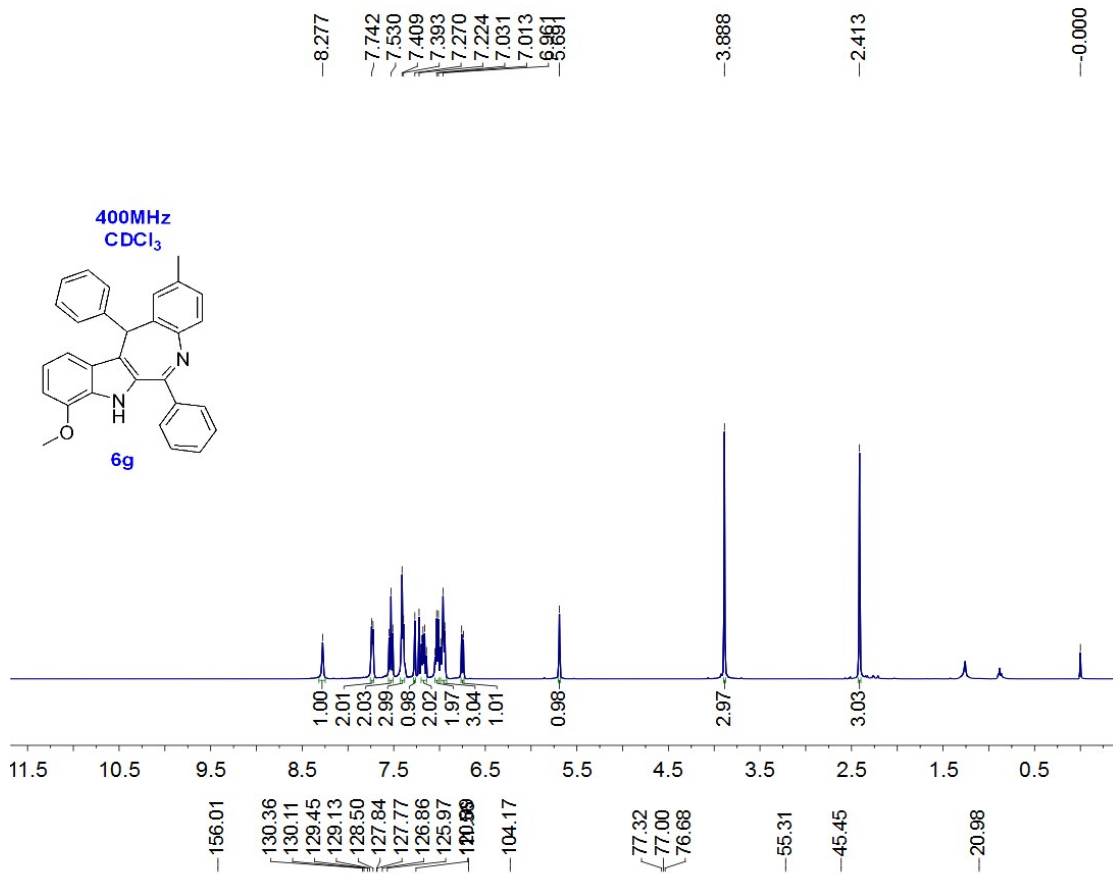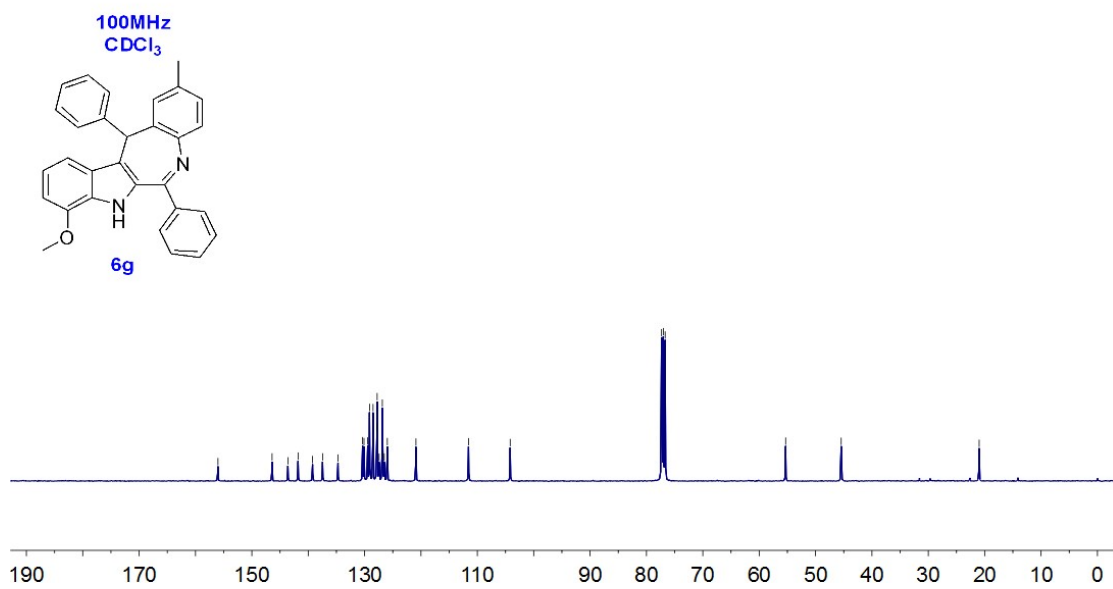

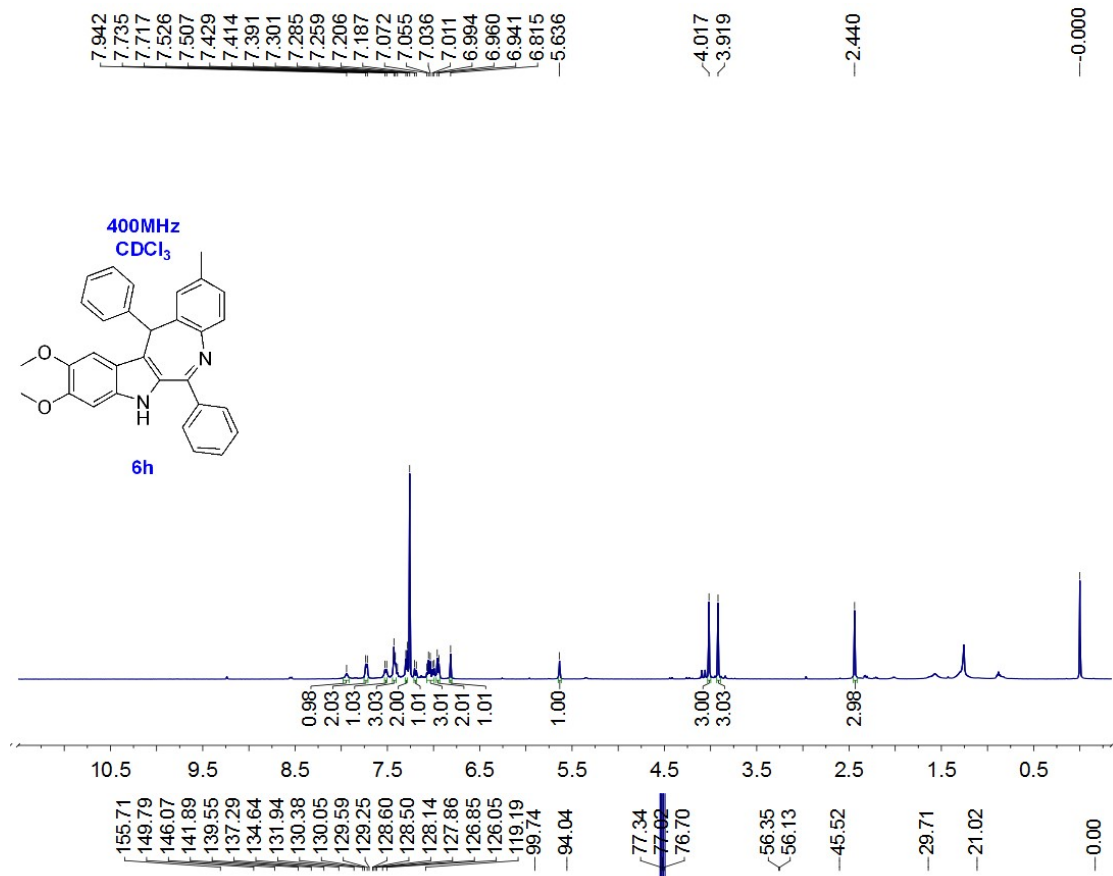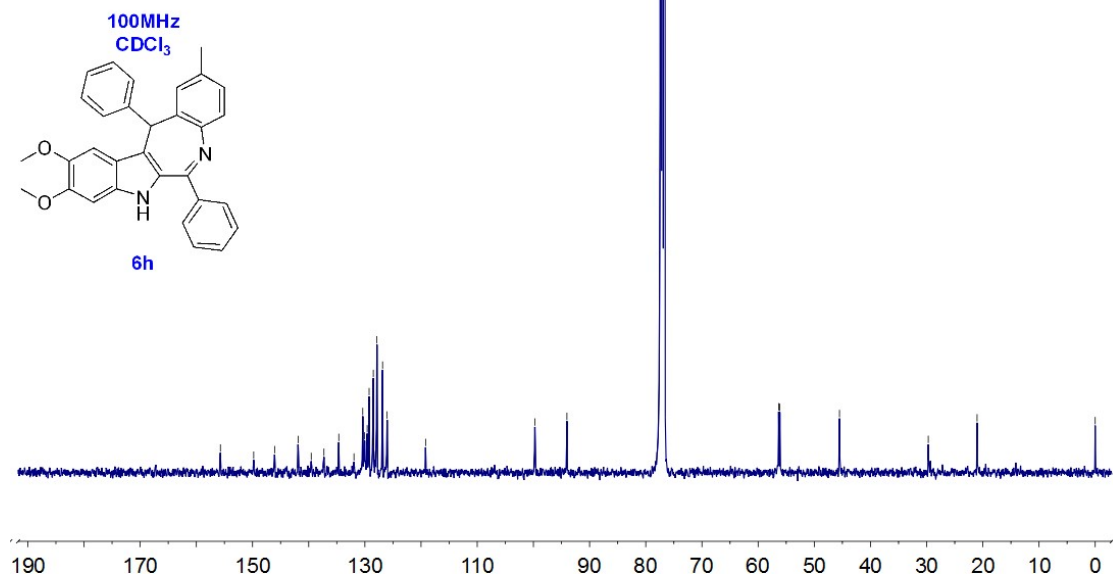

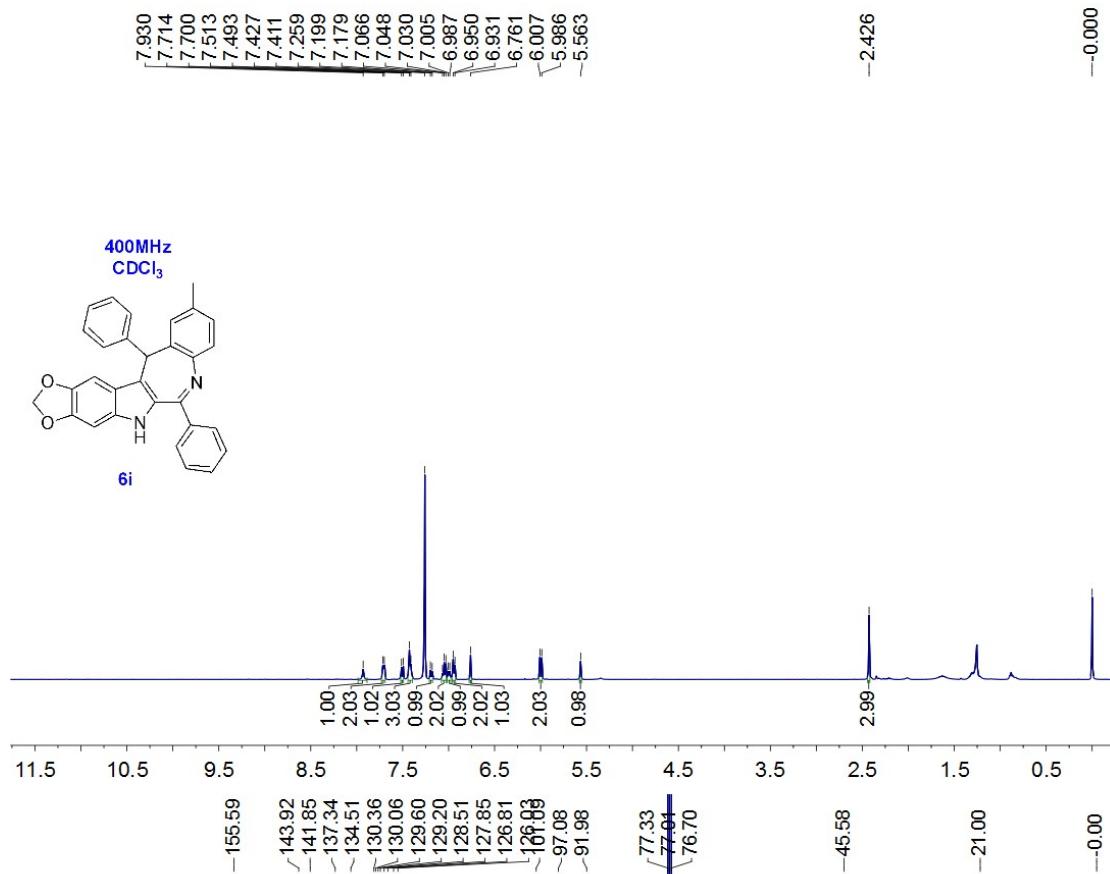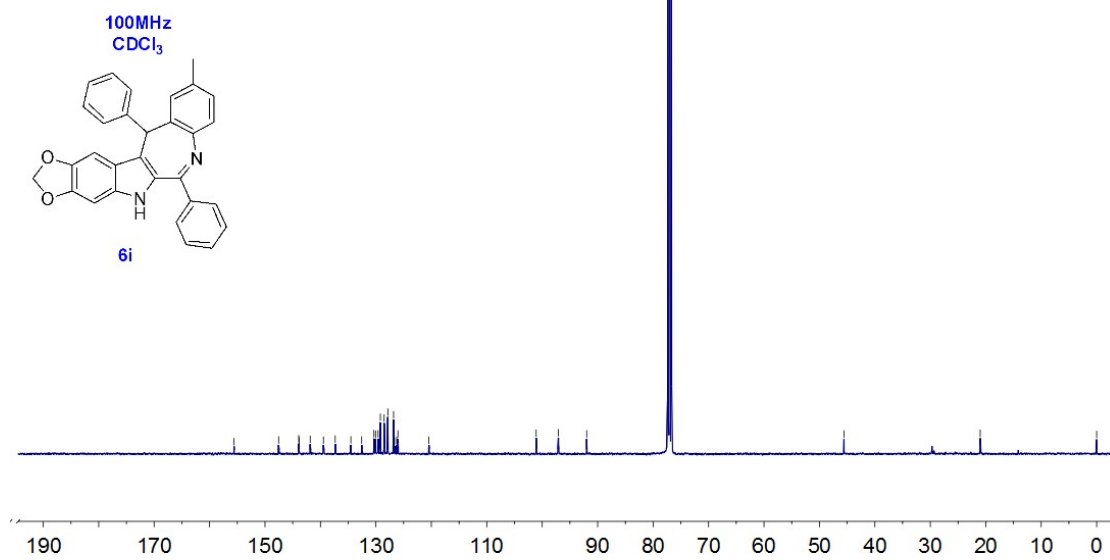

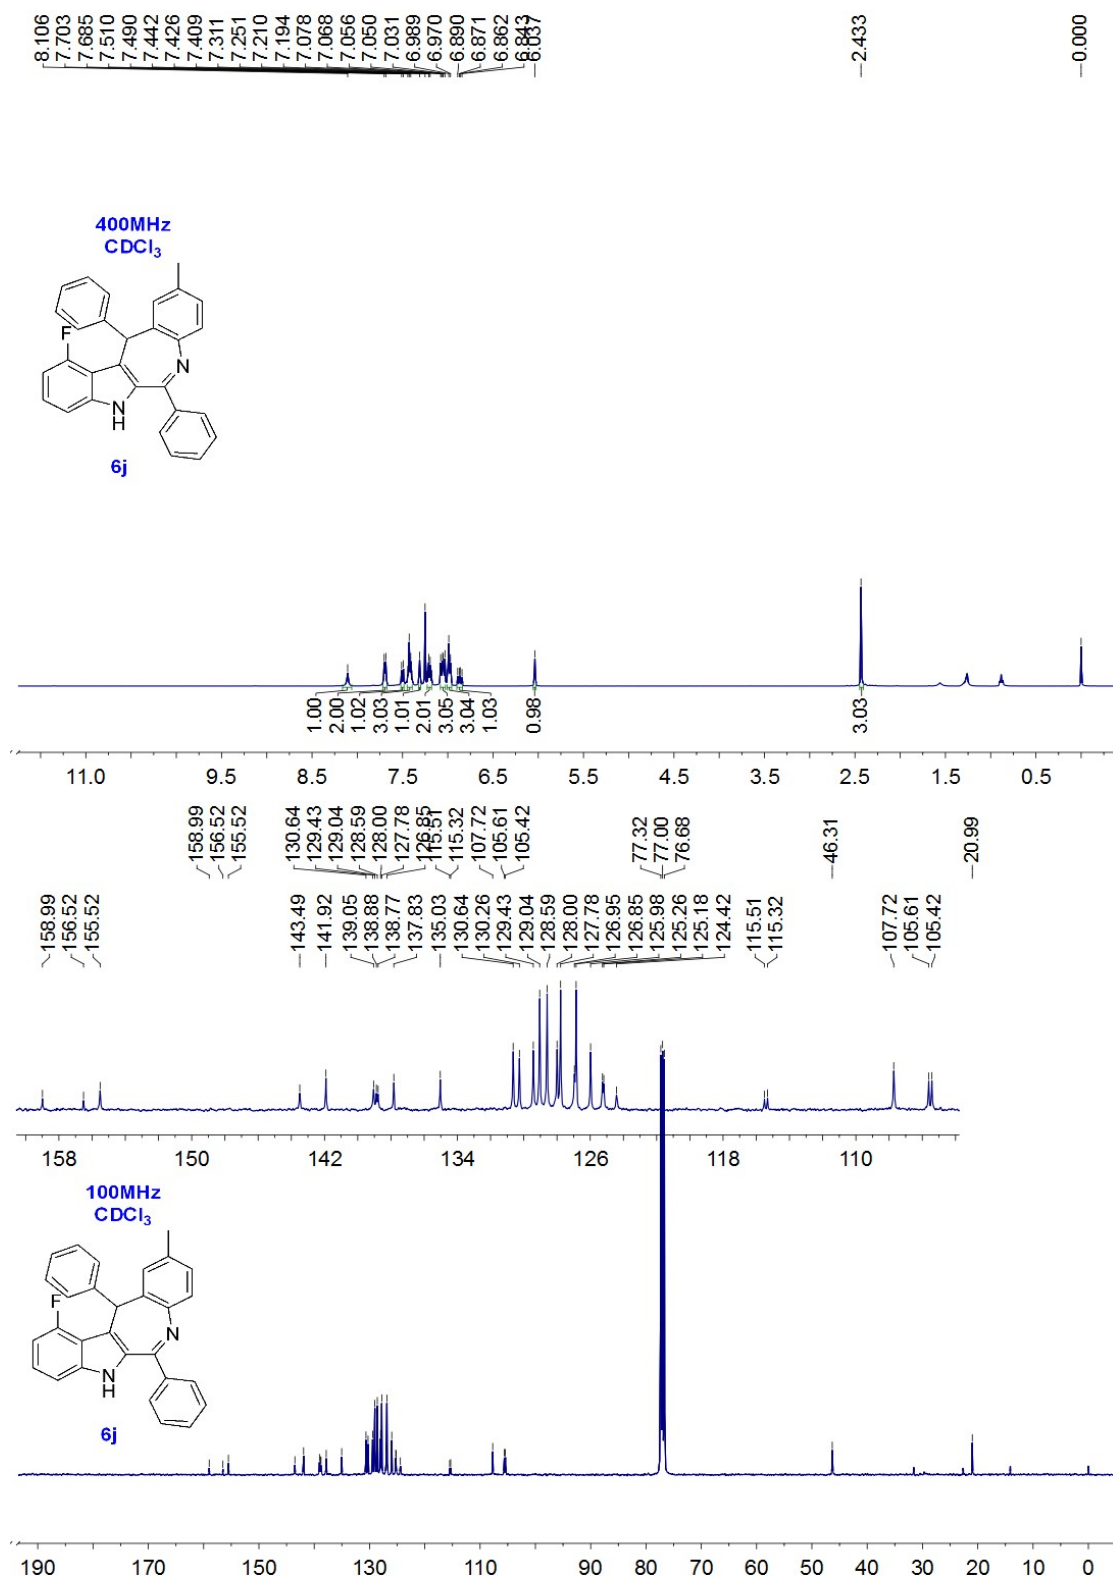



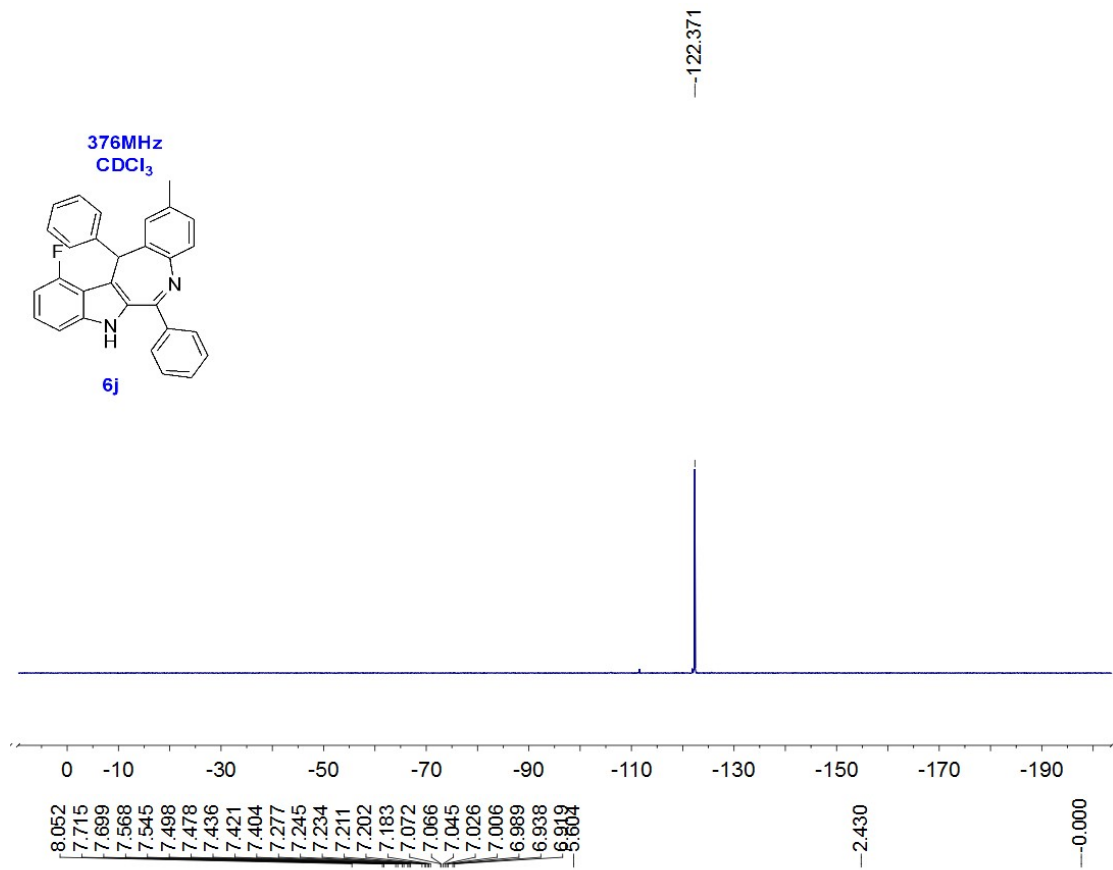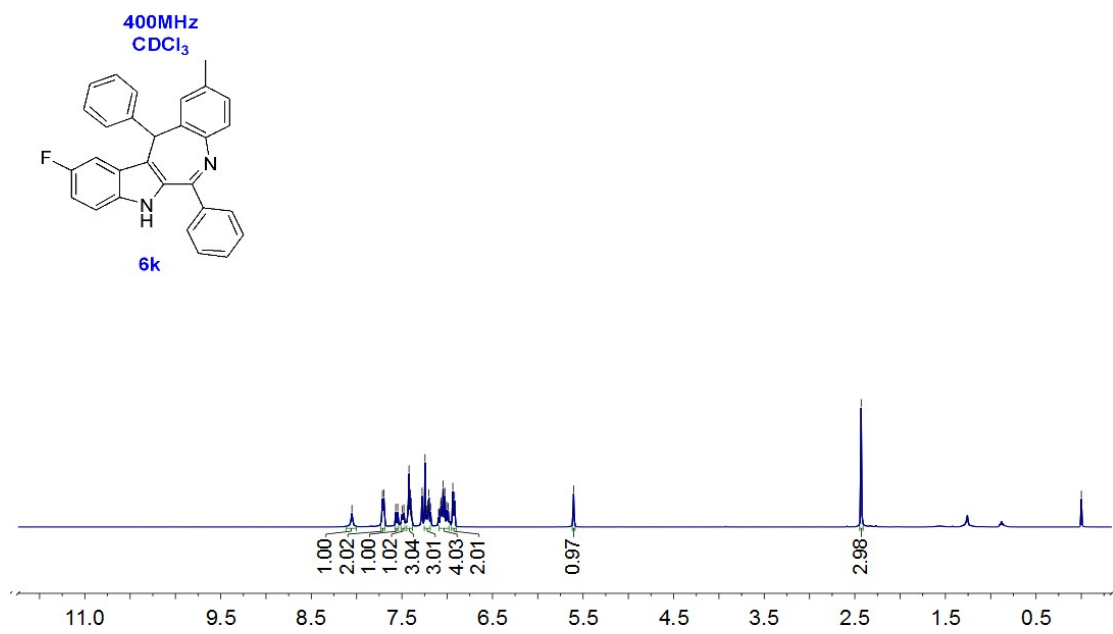

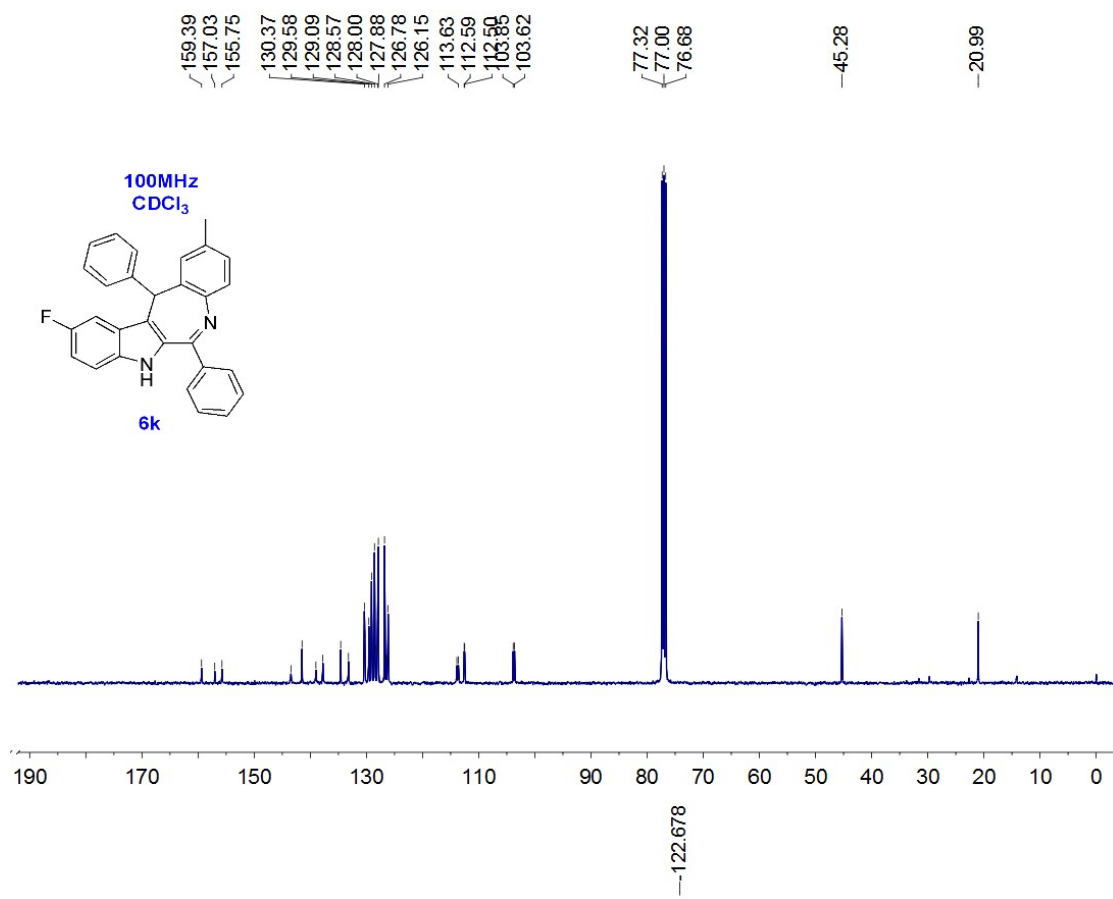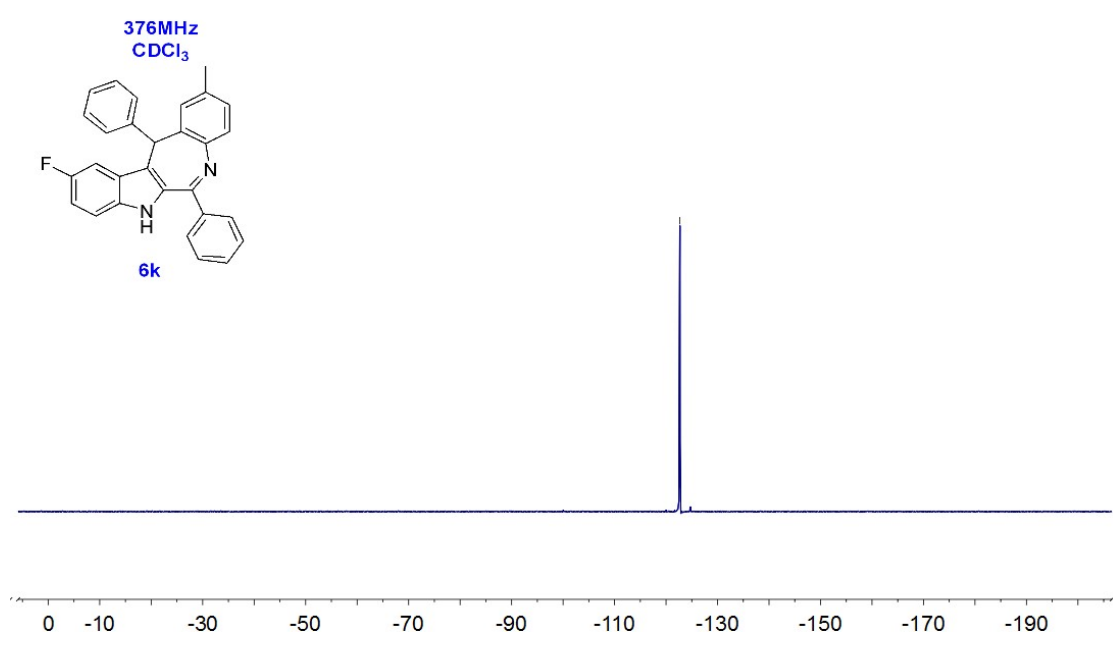

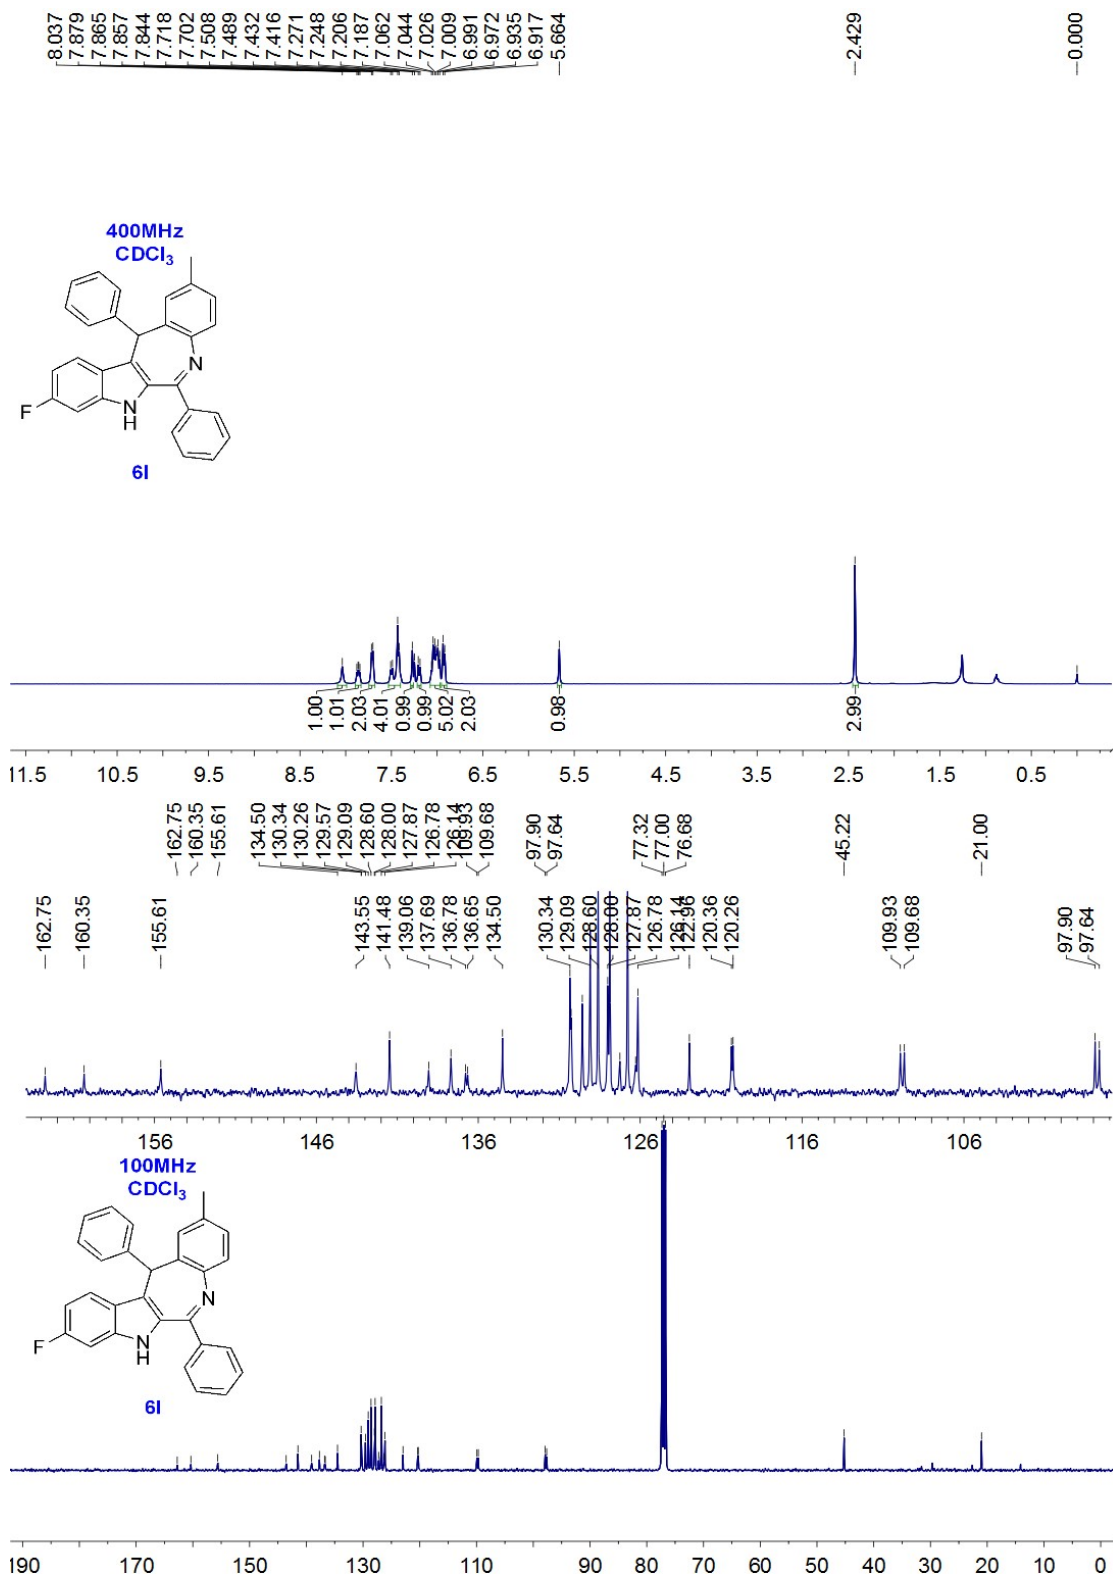

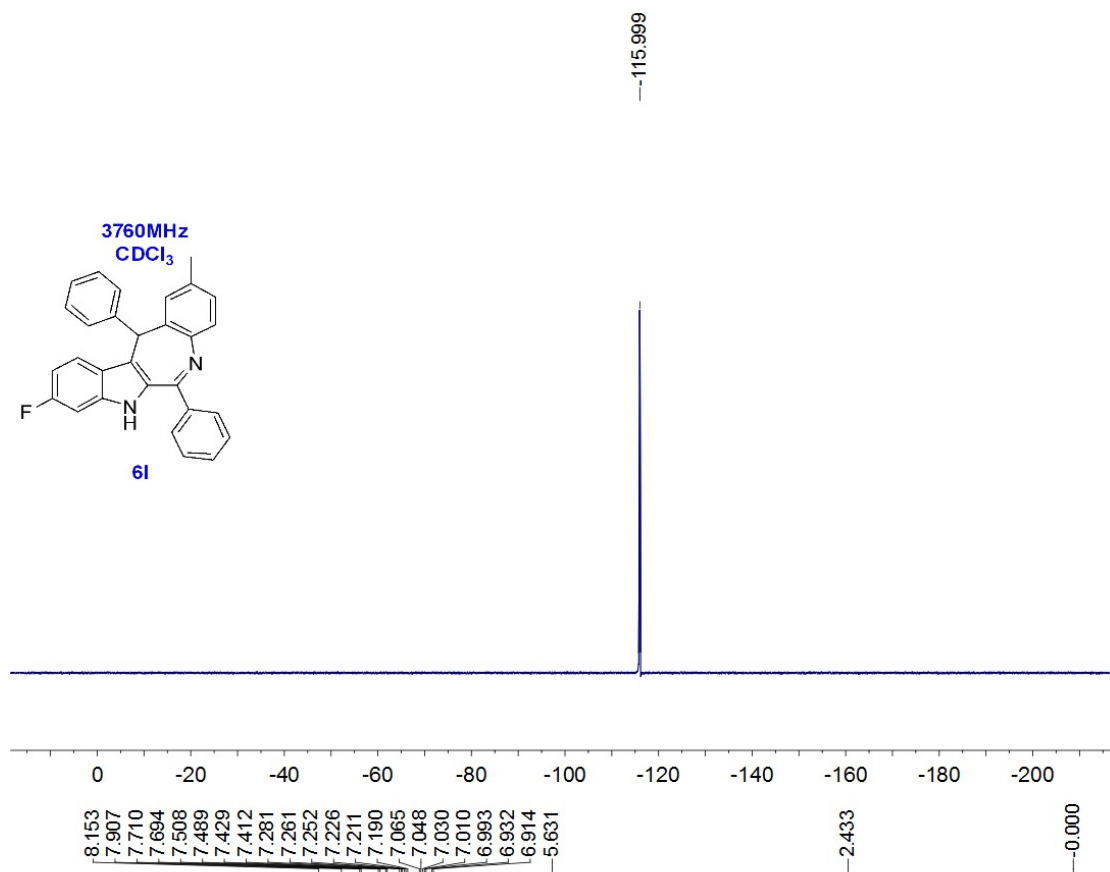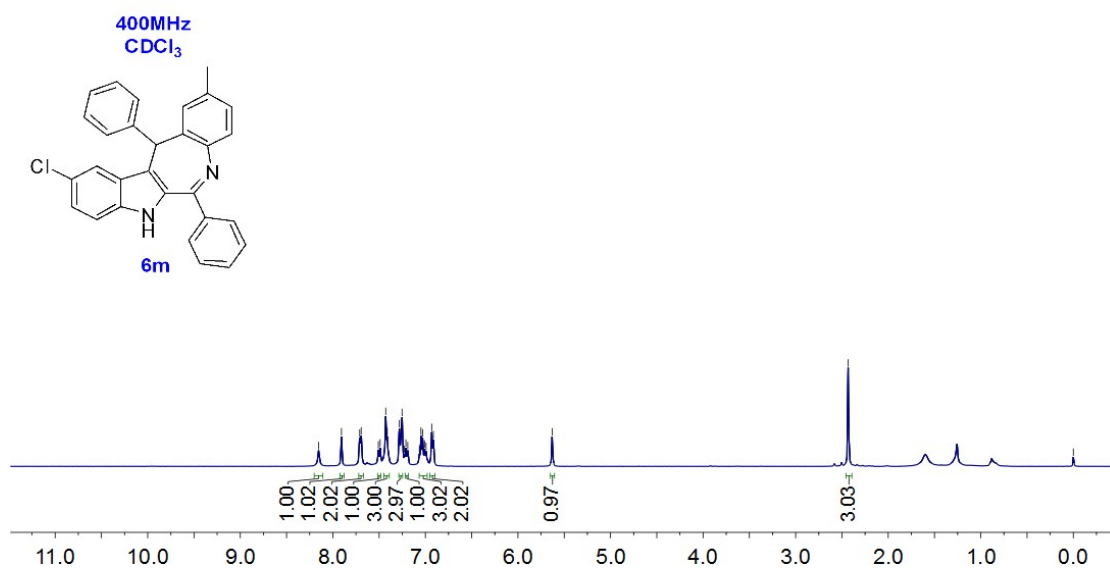

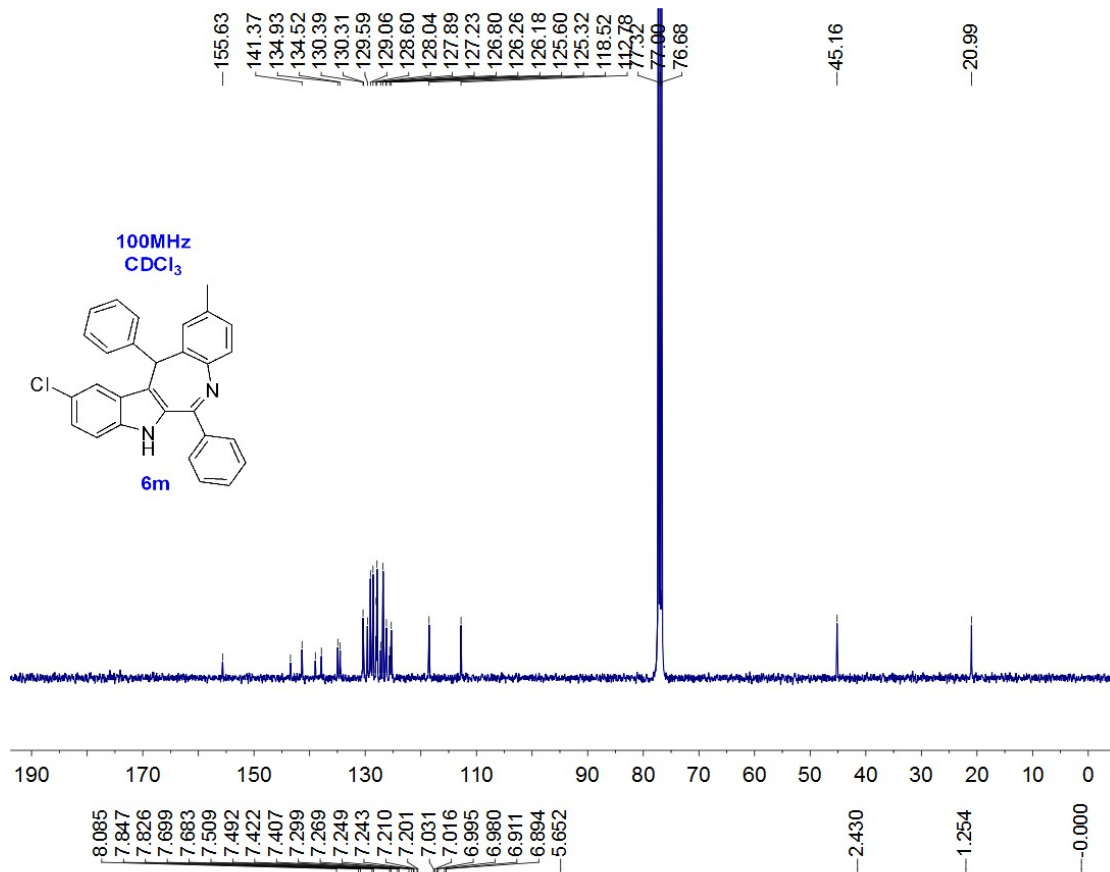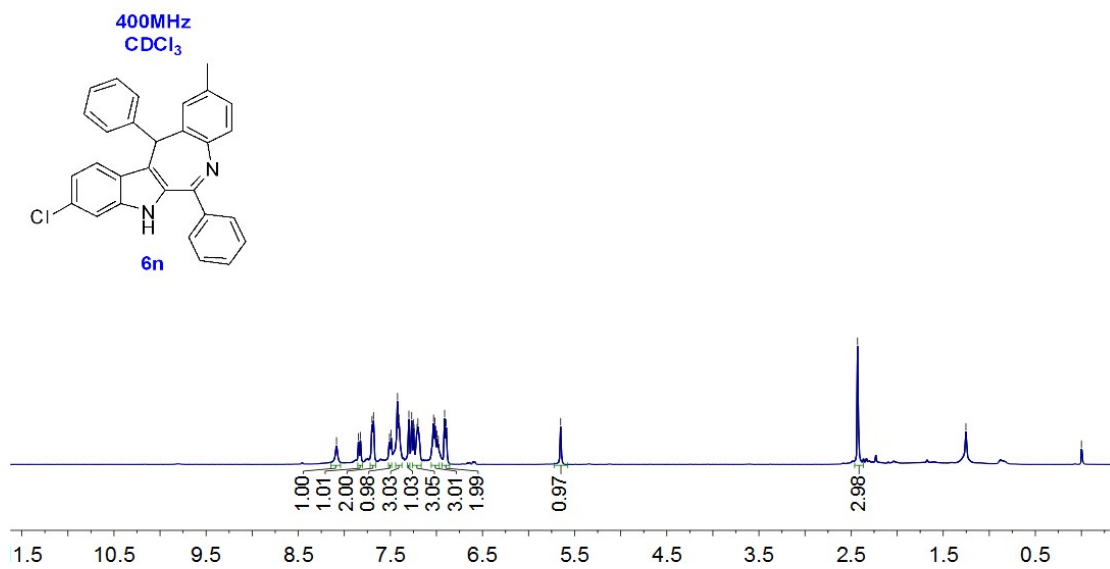

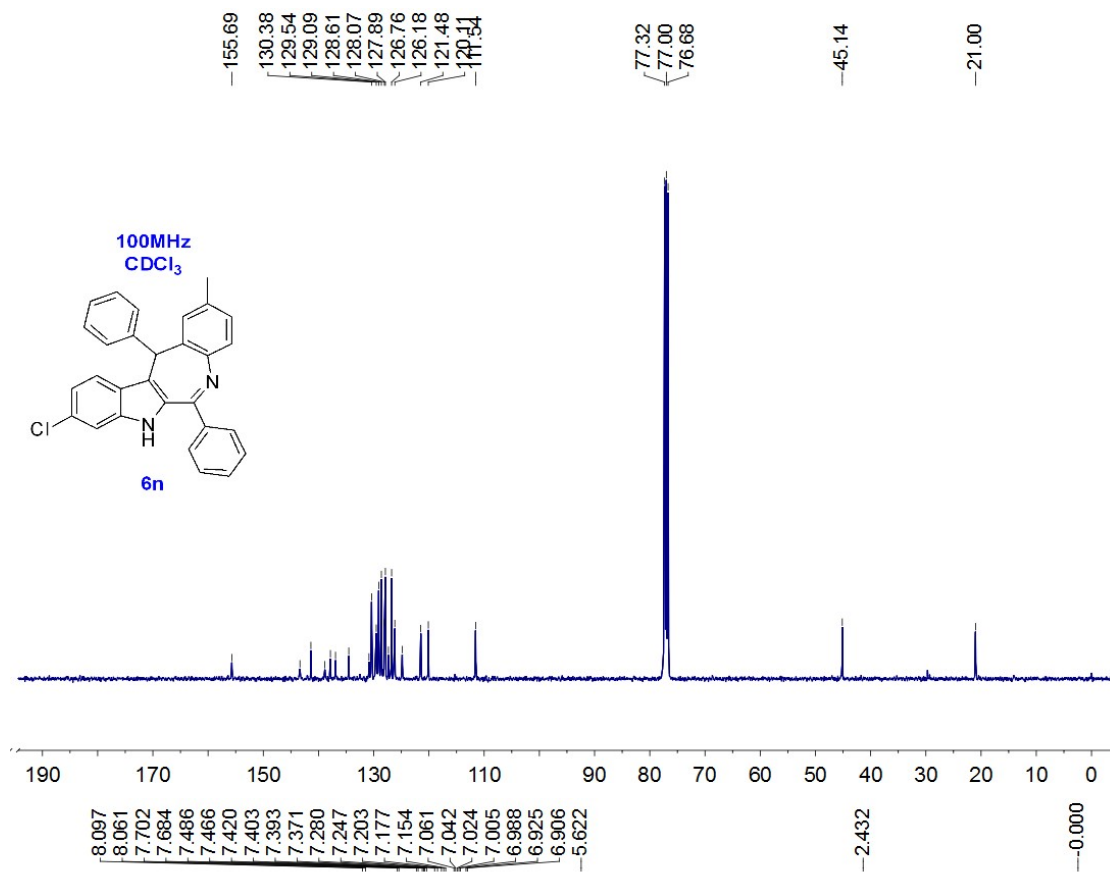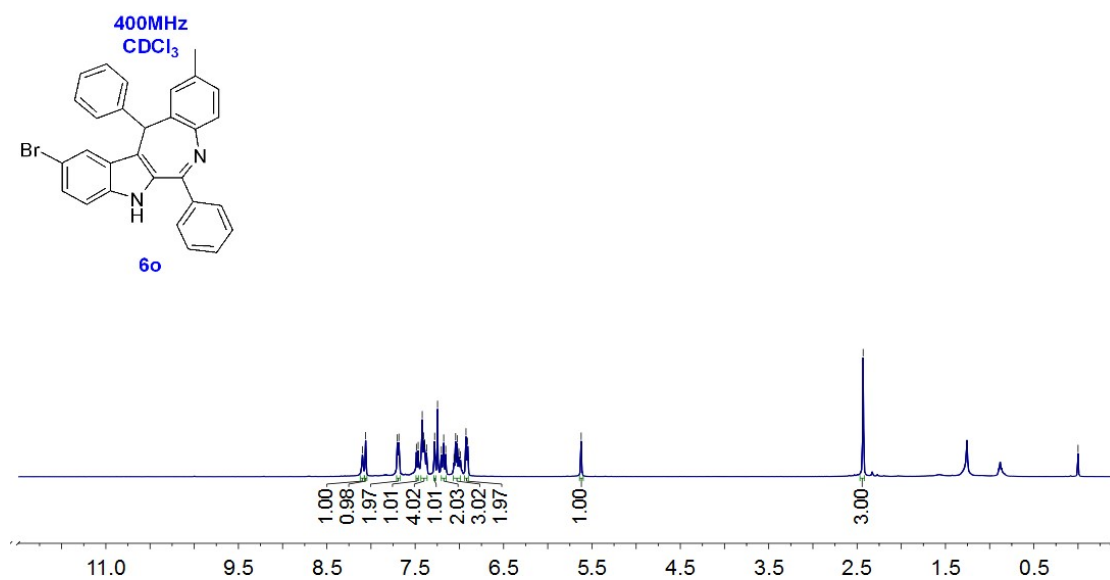

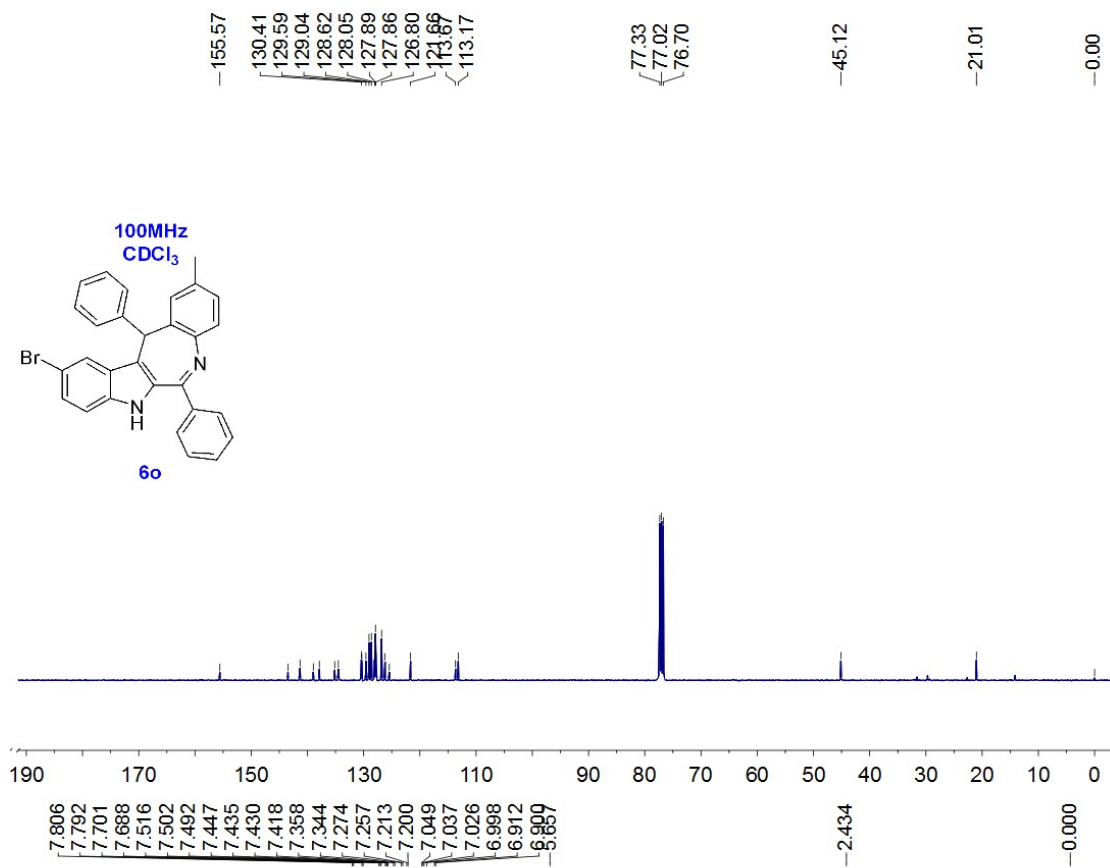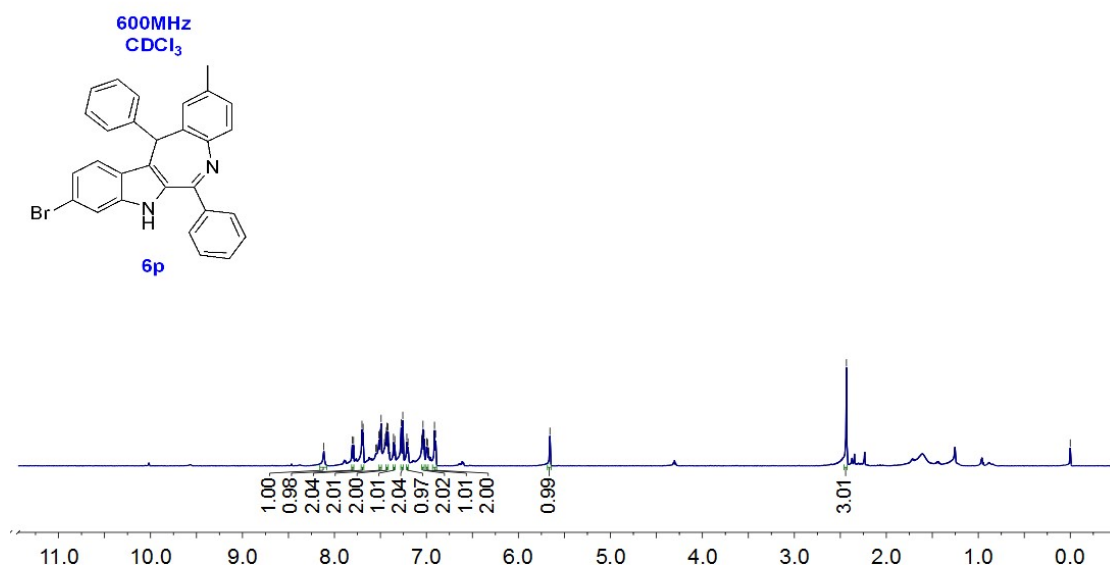

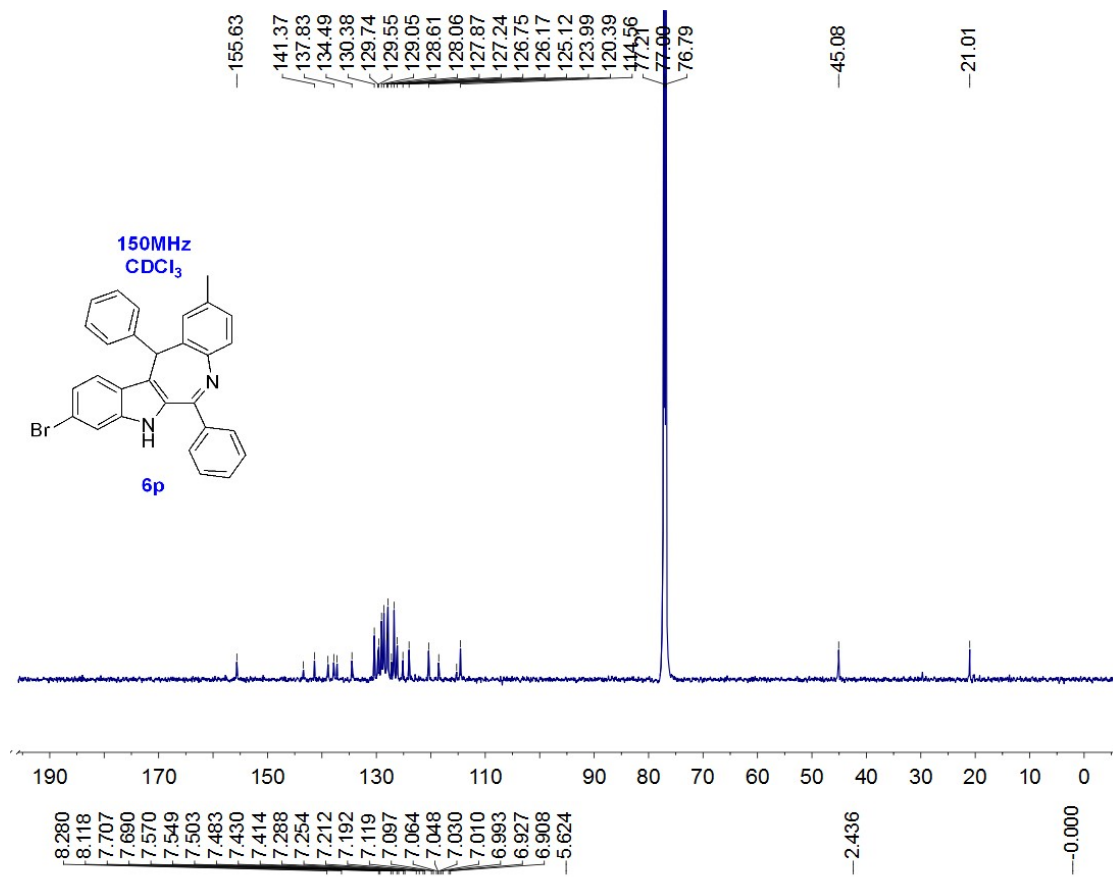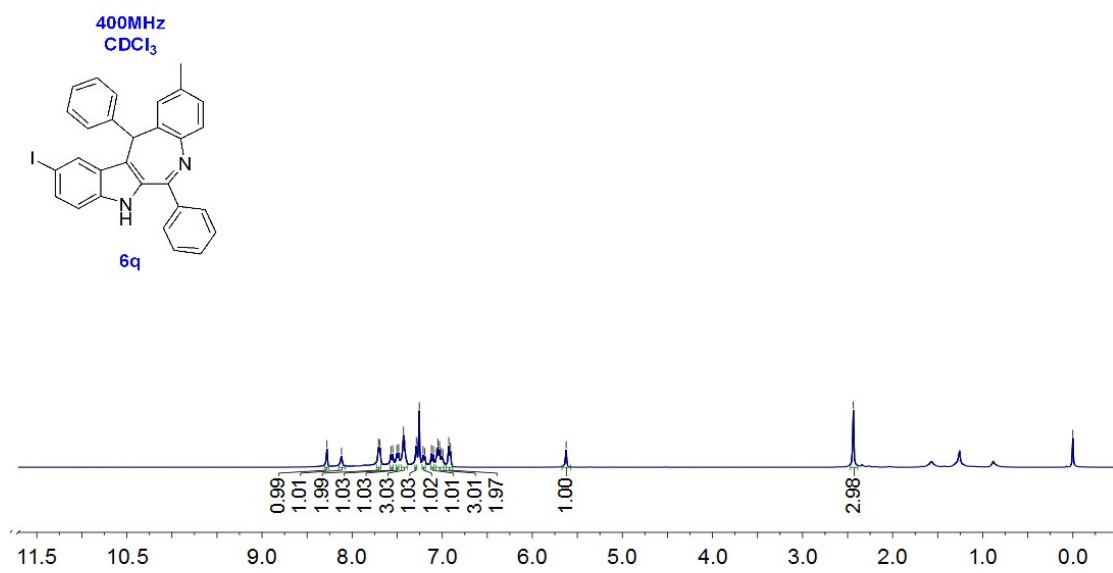



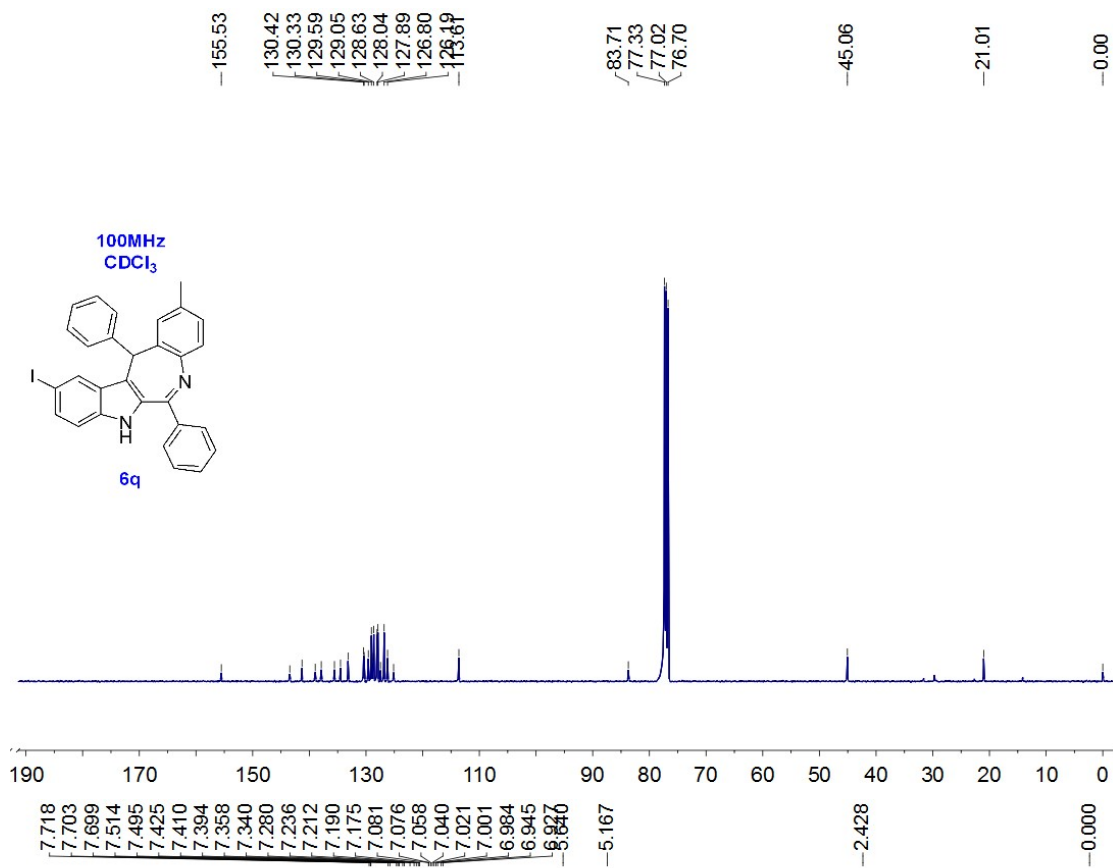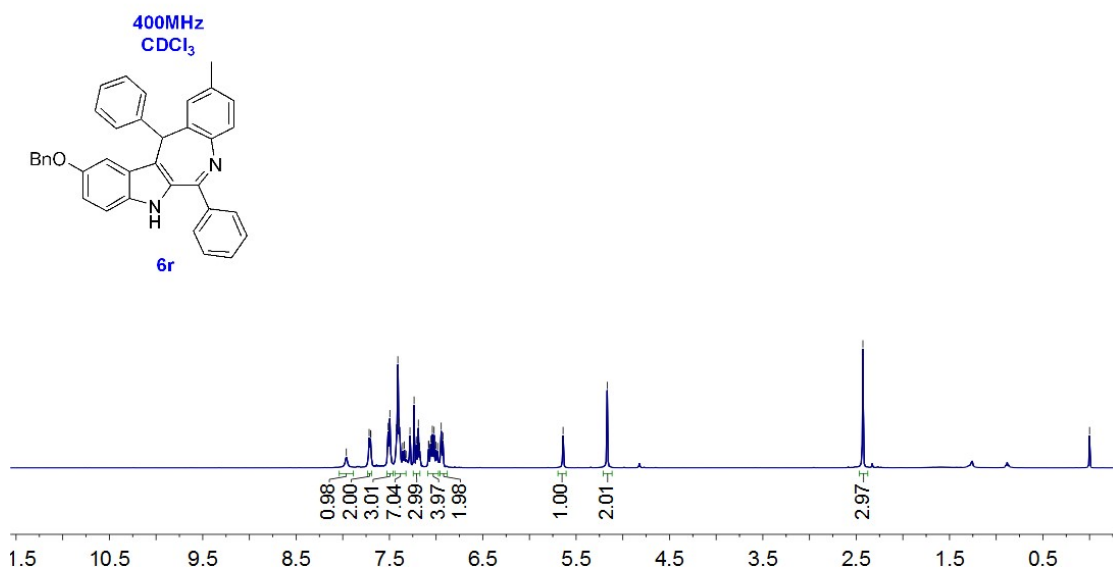

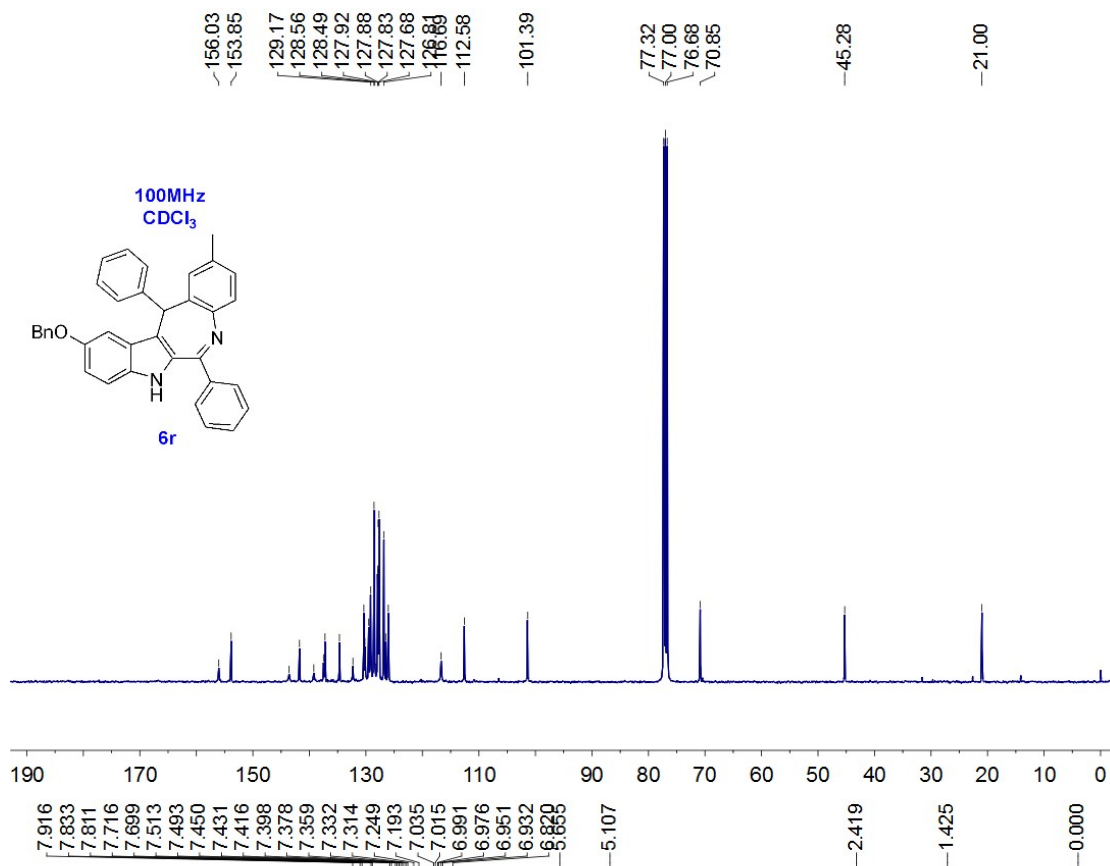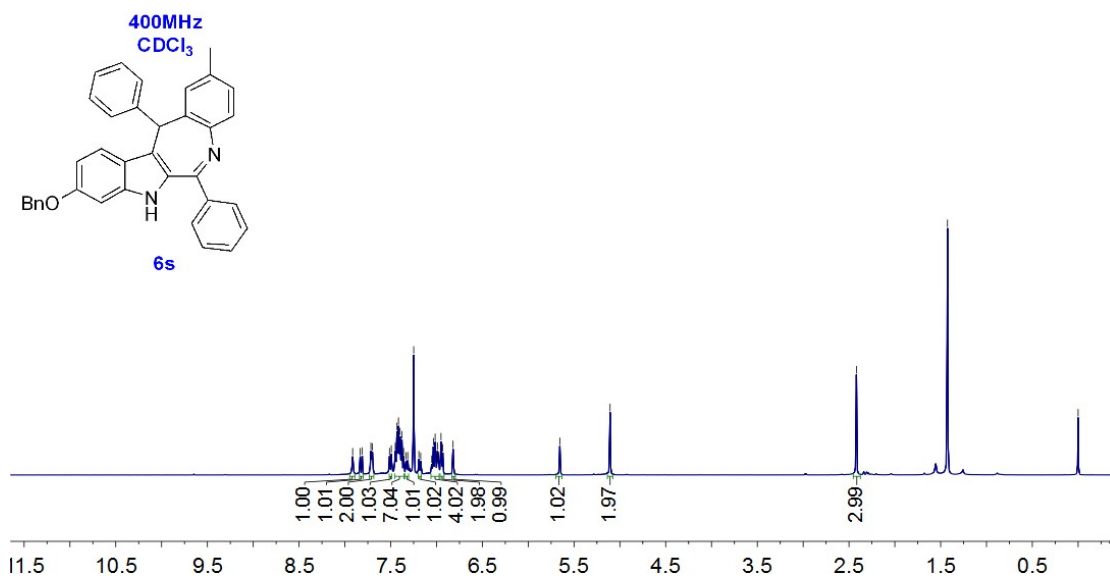

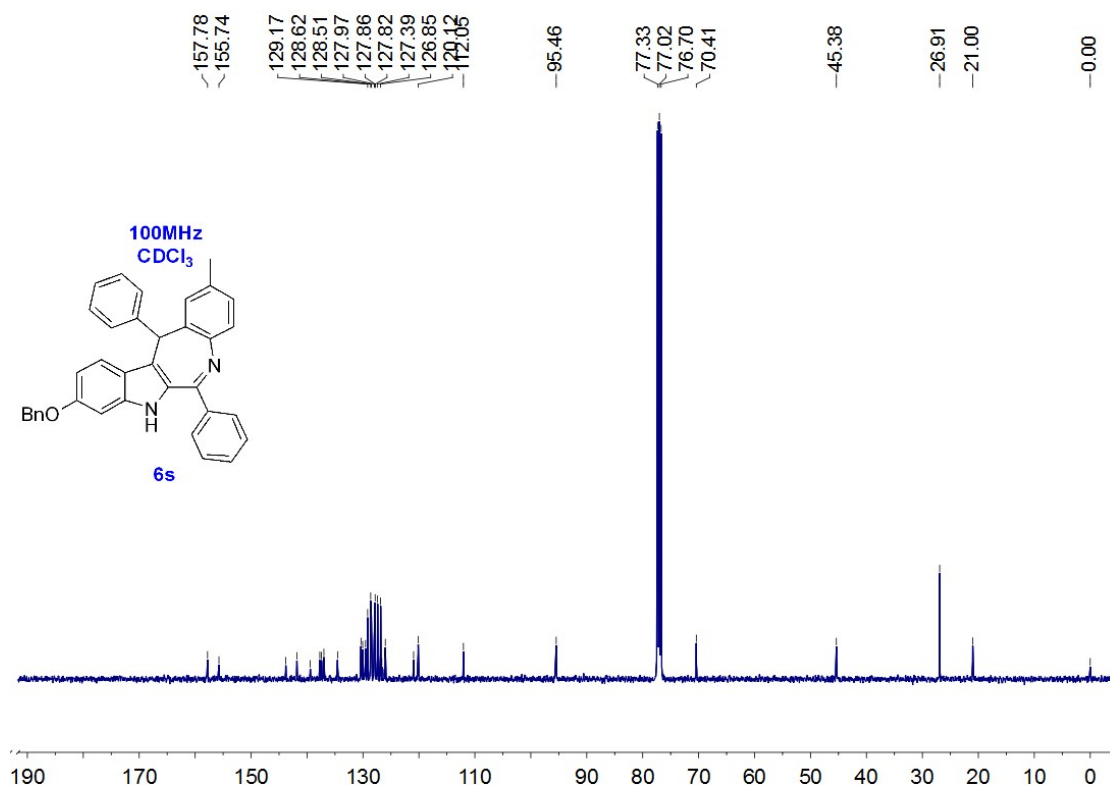

## 7. References

- (1) (a) J. C. Xiang, M. Wang, Y. Cheng and A. X. Wu, Molecular Iodine-Mediated Chemoselective Synthesis of Multisubstituted Pyridines Through Catabolism and Reconstruction Behavior of Natural Amino Acids. *Org. Lett.*, 2015, **18**, 24-27; (b) J. C. Xiang, Y. Cheng, Z. X. Wang, J. T. Ma, M. Wang, B. C. Tang, Y. D. Wu and A. X. Wu, Oxidative Trimerization of Amino Acids: Selective Synthesis of 2,3,5-Trisubstituted Pyridines. *Org. Lett.*, 2017, **19**, 2997-3000; (c) J. C. Xiang, Z. X. Wang, Y. Cheng, S. Q. Xia, M. Wang, B. C. Tang, Y. D. Wu and A. X. Wu, Divergent Synthesis of Functionalized Quinolines from Aniline and Two Distinct Amino Acids. *J. Org. Chem.*, 2017, **82**, 9210-9216. (d) J. C. Xiang, J. G. Wang, M. Wang, X. G. Meng and A. X. Wu, One-pot Total Synthesis of Streptindole, Arsindoline B and Their Congeners

Through Tandem Decarboxylative Deaminative Dual-coupling Reaction of Amino Acids with Indoles. *Org. Biomol. Chem.*, 2015, **13**, 4240-4247.

- (2) A. Schonberg and R. Moubacher, The Strecker Degradation of  $\alpha$ -Amino Acids. *Chem. Rev.*, 1952, **50**, 261-277.
- (3) (a) Li, W.; Lu, Z.; Hammond, G. B.; Xu, B. Unbalanced-Ion-Pair-Catalyzed Nucleophilic Fluorination Using Potassium Fluoride. *Org. Lett.* 2021, **23**, 9640-9644. (b) Z. Shen, X. Pan, Y. Lai, J. Hu, X. Wan, X. Li, H. Zhang and W. Xie, Chiral Ion-pair Organocatalyst Promotes Highly Enantioselective 3-exo Iodocycloetherification of Allyl Alcohols. *Chem. Sci.*, 2015, **6**, 6986-6990. (c) J. Han, Z. Lu, W. Wang, G. B. Hammond and B. Xu, Potassium Tris(triflyl)methide (KCTf3): a Broadly Applicable Promoter for Cationic Metal Catalysis. *Chem. Commun.*, 2015, **51**, 13740-13743. (d) Wang, X.; Zhou, L.; Zhang, H.; Ren, X.; Gao, G.; Wang, T. Enantioselective  $\gamma$ -Addition-Driven Cascade of  $\beta,\gamma$ -Unsaturated Ketones by Ion-Pair Catalysis: Access to Chiral 1,3-Dioxolochroman Scaffolds. *Org. Lett.*, 2021, **24**, 38-42. (e) Zhang, Z.; Liu, X.; Ji, L.; Zhang, T.; Jia, Z.; Loh, T. P. Metal-Free Access to (Spirocyclic)Tetrahydro- $\beta$ -carbolines in Water Using an Ion-Pair as a Superacidic Precatalyst. *ACS Catal.*, 2022, **12**, 2052-2057.
